# Supplementary material
Source: HighWire-hosted journal article supplement (https://www.jneurosci.org/content/39/50/9885)
Supplement: inline-supplementary-material-4 [file inline-supplementary-material-4.xls]

## Sheet: KO PTX rep 1
C1112	C2112	A3111	A3112	C3111	C3112	A4111	C1211	C1212	A2211	A2212	A3212	C3212	A4211	A4212	B4211	B4212	A1311	B1312	C1311	C1312	A2311	A2312	C2311	C2312	A3311	A3312	C3311	C3312	B4311	A1411	A1412	B1411	B1412	C1411	C1412	A2412	C2412	A3411	A3412	C3411	C3412	B4411	B4412	A1121	A1122	B1122	C1121	C1122	C2121
0	2	28	6	7	28	138	558	102	387	350	2	47	129	31	6	4	1298	1010	50	59	32	17	5	0	1	34	190	77	2	1	5	21	31	85	107	4	2	410	21	44	9	10	3	358	165	0	310	125	445
1	1	24	3	12	32	132	552	118	394	383	1	40	132	17	7	3	1285	983	48	59	13	17	3	0	3	20	201	74	4	0	8	31	22	95	99	1	3	422	14	65	9	9	4	335	173	1	371	146	429
0	4	34	5	18	34	125	555	118	391	431	1	48	131	25	4	3	1296	914	46	69	18	16	4	0	4	23	189	80	4	1	5	21	22	103	105	0	6	429	28	63	4	6	1	386	159	2	361	147	430
1	2	41	3	9	40	134	596	114	364	349	0	57	122	35	5	1	1202	988	40	63	34	11	3	1	2	34	214	72	3	2	4	18	20	97	107	5	3	424	19	65	10	5	2	352	159	3	345	119	414
0	4	25	6	13	26	147	591	111	359	391	1	48	139	21	1	0	1281	1033	59	59	23	18	3	0	3	31	187	78	2	2	4	13	25	103	117	1	4	405	15	53	12	4	2	346	169	0	374	145	423
2	4	29	5	4	28	160	535	112	351	387	1	32	135	30	3	0	1248	991	44	47	28	15	0	2	1	17	194	73	2	1	3	20	31	90	103	2	3	413	20	63	7	5	2	351	176	1	293	112	435
0	8	29	3	8	30	142	570	122	381	364	2	34	144	29	8	0	1266	1031	58	42	31	16	3	1	3	22	215	77	0	1	4	14	30	102	128	2	2	427	21	50	16	5	4	335	181	1	360	146	430
1	2	34	3	12	27	124	537	119	376	393	0	36	144	20	4	2	1217	1013	42	50	29	15	2	0	1	29	211	84	2	0	3	15	20	108	96	1	7	464	17	46	8	9	2	358	173	4	363	119	414
0	3	32	6	10	27	153	498	106	400	414	1	40	124	35	4	2	1156	926	39	52	25	16	7	2	6	23	206	88	3	0	8	22	16	96	100	3	1	459	23	52	8	2	6	351	158	2	322	115	472
1	0	41	1	13	34	148	473	115	350	368	3	45	116	30	5	1	1170	968	44	43	25	17	8	0	2	24	185	88	0	0	3	27	19	95	94	3	1	462	20	48	12	6	5	315	166	0	298	107	414
1	1	37	4	12	36	127	437	99	380	415	6	47	149	31	6	1	1185	950	37	37	33	13	5	0	6	29	208	77	5	1	3	20	28	83	95	2	2	447	18	64	6	5	4	359	164	4	277	110	493
0	2	28	5	11	30	146	366	88	374	398	2	49	126	27	9	5	1255	1054	32	31	26	11	2	2	3	22	173	89	3	0	2	23	28	77	57	0	3	433	25	59	6	4	4	364	185	1	199	98	482
0	0	40	8	5	29	111	392	79	388	372	1	33	135	19	5	1	1178	1011	43	31	25	14	3	1	2	24	232	69	2	0	5	15	21	76	68	2	2	435	16	65	9	3	2	384	155	5	245	99	519
0	7	35	6	9	32	151	518	117	367	444	1	50	129	24	3	2	1223	1031	68	43	30	14	5	1	1	24	227	86	4	2	1	15	21	96	121	3	4	446	17	52	8	4	3	354	196	2	327	131	438
1	3	41	3	10	39	131	363	105	384	406	0	50	151	23	8	0	1241	1064	38	32	24	18	3	2	2	21	194	87	8	2	2	17	25	65	76	0	5	428	23	51	9	7	3	381	220	2	228	91	479
1	4	31	6	8	37	144	494	117	362	399	0	45	145	31	5	2	1224	988	54	49	30	16	3	1	4	24	209	92	3	1	6	12	21	87	99	2	6	449	23	59	11	7	3	404	206	3	302	110	472
0	0	28	5	10	30	156	466	108	356	414	2	36	134	24	6	3	1146	978	47	35	31	12	4	0	3	20	199	78	0	1	2	20	26	91	96	4	2	468	18	61	7	3	3	419	165	1	269	120	448
1	1	27	8	6	34	131	358	78	388	404	0	40	115	25	8	2	1211	1021	43	26	30	15	1	1	0	27	196	90	6	2	3	16	26	68	82	2	1	444	19	71	19	3	5	434	202	4	216	82	428
0	5	33	6	14	28	139	537	120	377	415	0	48	153	21	3	0	1183	969	54	54	34	19	2	0	1	25	199	79	1	2	3	16	30	104	102	2	5	442	23	72	4	1	1	452	202	2	311	125	445
0	3	36	1	8	27	158	465	115	353	425	0	31	129	26	4	1	1158	1010	52	47	34	12	2	0	4	26	199	75	1	2	3	18	22	84	101	4	2	462	29	58	13	2	4	412	194	1	294	113	426
0	4	39	2	8	41	145	472	125	365	413	0	40	136	24	9	0	1305	984	63	44	24	16	5	0	6	26	205	73	2	1	4	23	23	98	95	0	4	448	14	66	7	3	3	477	217	4	268	117	433
0	3	29	1	14	23	141	442	102	381	394	0	46	144	18	5	1	1245	1073	62	32	28	17	2	0	2	22	189	77	1	0	3	14	23	91	94	5	0	460	28	77	6	2	2	407	205	2	283	114	501
0	5	38	6	14	27	129	452	124	402	446	1	48	140	21	11	2	1178	1029	49	56	28	19	5	1	4	20	208	74	3	1	4	21	29	86	108	2	1	420	20	76	5	7	2	392	200	5	312	101	492
1	1	25	1	7	27	122	504	129	393	424	1	30	116	35	8	2	1228	1030	57	56	21	12	3	0	6	22	178	85	1	1	3	21	19	98	105	1	2	457	20	58	4	6	4	403	198	1	312	108	526
0	1	34	5	10	24	109	377	86	387	463	0	42	145	42	5	2	1160	1002	38	32	37	15	4	0	6	18	178	70	2	0	7	18	21	78	83	2	3	459	18	72	12	6	3	447	205	4	215	92	494
0	3	42	6	10	37	128	353	73	376	410	0	40	135	28	4	2	1159	986	40	28	42	15	2	1	2	17	206	76	1	0	4	12	27	59	74	3	2	469	29	80	9	5	7	456	181	3	186	91	501
2	1	28	5	8	33	134	527	116	378	440	0	37	135	22	10	1	1055	984	72	42	33	13	4	0	1	17	175	82	1	0	2	22	26	104	114	1	2	421	23	58	8	5	3	411	160	0	343	118	532
1	5	30	6	10	35	153	503	110	368	418	0	43	123	27	5	0	1052	1051	50	48	30	25	5	0	7	24	203	68	2	2	5	23	26	84	107	2	3	433	35	81	8	3	3	388	165	1	281	124	531
0	8	37	6	15	31	145	312	69	401	409	0	41	105	24	6	2	1094	981	36	24	33	24	2	1	1	24	184	81	4	2	3	24	19	57	83	0	3	449	20	80	8	6	4	408	183	4	181	89	561
1	3	32	3	10	34	148	410	65	408	418	4	45	127	34	8	6	1044	997	57	39	24	21	4	1	0	21	187	91	3	0	4	15	22	75	85	2	4	465	16	79	13	3	8	460	175	5	249	99	517
1	3	45	7	11	30	146	459	101	381	397	3	50	124	25	9	3	1139	947	57	36	37	14	5	0	1	22	157	93	1	0	1	19	23	81	97	1	8	437	16	73	8	4	7	418	164	0	255	113	503
0	0	27	4	12	31	164	430	72	359	382	0	50	130	33	1	0	1086	999	55	37	26	16	1	0	7	17	178	77	4	2	2	23	29	94	72	1	3	437	22	90	14	7	3	451	178	6	239	89	487
2	2	28	6	13	28	134	374	95	394	413	2	51	118	42	7	3	1088	984	43	26	35	23	5	0	4	30	177	91	2	1	5	14	28	58	88	3	6	443	21	83	10	6	5	410	207	3	211	72	507
0	5	26	6	10	27	168	226	63	372	397	0	24	130	22	10	0	1095	1081	25	23	36	16	5	2	0	25	197	75	2	1	4	22	22	48	42	1	5	451	25	75	5	6	1	468	223	4	141	53	556
0	2	19	5	4	29	93	287	72	295	281	1	28	83	27	6	1	795	698	39	29	24	12	3	1	0	17	131	59	1	1	3	10	17	61	51	2	2	314	12	49	6	5	0	331	140	4	164	79	382
0	4	15	1	5	22	92	209	52	205	272	0	21	65	17	4	2	583	436	32	21	18	10	1	0	1	18	108	37	2	2	0	9	6	43	41	1	2	248	20	39	5	6	3	185	83	0	153	48	239
0	2	44	5	13	35	184	480	111	454	517	3	55	117	33	10	3	1287	968	65	49	67	32	7	0	3	28	249	100	2	1	5	26	28	80	114	2	6	443	29	84	11	13	4	372	182	1	339	95	511
2	3	42	4	15	32	199	485	112	421	508	1	48	144	33	4	4	1375	1014	69	45	48	30	6	2	1	25	219	91	1	3	9	20	24	99	113	2	7	453	30	85	16	11	6	403	204	2	310	117	514
3	3	44	7	11	44	188	623	134	463	567	0	51	150	36	5	1	1500	1060	71	69	51	43	4	0	0	32	250	91	0	3	8	18	20	116	116	0	4	459	35	105	10	12	8	416	193	3	379	130	501
1	4	46	1	18	45	186	781	161	495	619	0	40	139	32	8	2	1636	1033	122	78	65	41	2	1	1	35	225	98	1	3	4	23	30	156	142	4	1	484	32	106	18	17	9	427	215	3	498	197	521
0	6	47	8	12	51	159	639	149	535	632	3	45	168	20	11	3	1625	1052	105	65	60	40	5	0	10	30	216	104	4	2	6	22	23	117	140	4	3	421	36	100	10	8	11	437	189	2	411	169	504
1	3	48	7	14	43	200	581	165	570	658	1	71	154	36	13	2	1694	1016	100	63	68	47	5	1	3	26	232	79	2	4	5	30	31	128	137	4	7	467	28	94	16	10	6	457	207	4	392	175	539
2	7	42	8	17	48	178	618	153	553	627	0	59	188	26	13	1	1785	1037	110	66	86	38	7	2	6	42	233	104	1	2	3	29	24	115	148	8	11	449	40	100	8	11	7	456	205	2	410	162	556
0	7	43	7	19	48	164	616	154	562	702	0	51	138	45	7	3	1728	1074	115	46	69	29	6	2	3	39	219	92	4	2	6	23	28	116	131	3	12	462	30	108	8	11	7	435	193	1	445	168	534
0	7	51	11	14	46	177	699	163	593	643	1	60	190	26	10	3	1904	1096	135	69	92	29	7	0	5	34	222	90	4	2	5	29	31	122	161	7	11	434	42	106	14	6	9	417	207	4	464	187	524
0	5	65	5	12	46	183	681	180	570	670	3	52	196	39	8	1	1847	1118	109	52	78	33	6	0	2	35	229	91	3	2	6	33	24	131	142	4	4	439	32	118	16	13	6	391	183	7	447	194	539
0	3	35	3	16	49	201	699	174	568	676	1	69	177	35	14	3	1916	1186	114	52	91	48	1	1	9	35	232	94	8	1	8	27	29	109	151	5	6	416	28	103	18	11	6	397	181	2	447	180	515
1	10	46	7	15	52	197	716	155	571	705	0	58	169	37	11	5	2074	1107	132	59	78	36	3	3	4	38	230	76	3	1	13	21	32	145	130	4	5	440	37	120	11	12	7	399	188	4	474	173	510
1	5	64	7	20	30	197	522	152	554	677	3	66	198	38	10	3	2238	1187	91	68	84	32	8	0	2	39	205	108	3	3	7	22	25	90	103	4	9	457	27	129	12	8	8	418	201	7	366	170	505
1	8	41	3	18	48	177	674	176	545	698	5	58	192	26	10	1	2198	1146	127	60	71	38	4	1	9	50	249	64	7	2	9	27	34	122	162	5	7	454	37	117	11	16	12	413	190	3	488	203	564
2	4	57	2	16	45	218	734	193	612	662	2	67	159	34	15	3	2045	1138	120	68	78	40	6	3	3	38	230	89	4	1	10	22	31	147	140	7	9	434	31	120	17	11	6	399	203	1	499	210	517
2	2	48	2	16	41	192	655	171	588	642	2	57	177	31	13	8	1820	1202	126	53	86	42	2	0	12	37	253	92	4	3	6	24	31	126	152	7	4	425	31	148	15	9	7	349	214	5	445	203	474
2	7	54	5	16	48	199	632	162	543	681	0	70	171	33	8	2	922	1219	119	68	81	42	8	1	5	35	249	98	4	4	15	24	30	154	135	3	8	425	29	141	12	13	4	321	218	5	455	213	460
0	6	44	3	18	45	185	693	212	515	671	1	63	155	40	13	2	1138	1195	129	70	78	35	4	0	6	42	231	78	4	1	13	21	29	141	167	3	6	438	27	123	12	11	6	361	190	4	530	227	513
2	5	45	7	18	45	155	684	188	543	673	0	76	182	32	10	5	828	1151	151	64	85	38	5	2	6	44	222	83	5	2	3	24	35	131	167	4	5	422	25	121	13	14	9	335	179	4	516	216	515
4	7	48	11	13	46	174	671	178	540	650	1	63	175	34	12	3	756	1231	138	54	75	35	9	1	5	30	241	100	3	2	10	23	27	117	152	1	6	431	25	122	10	7	3	330	192	5	473	218	547
3	12	34	5	12	42	179	722	214	500	635	0	48	182	30	8	5	1500	1241	147	63	90	42	4	2	7	30	239	94	7	0	3	29	21	113	193	5	8	440	31	116	17	7	7	307	195	1	529	214	531
0	6	47	3	20	48	164	764	208	518	667	2	68	200	45	12	1	1131	1225	144	78	80	42	6	1	5	41	223	92	4	5	3	26	31	138	179	5	9	441	30	154	10	11	5	297	187	3	528	249	582
2	3	52	6	8	52	175	663	165	517	609	0	56	198	40	16	4	1566	1212	150	65	85	29	4	1	11	48	219	95	2	0	11	22	37	131	129	7	4	425	36	140	15	5	14	298	179	3	491	225	552
0	4	50	4	16	43	166	745	183	508	667	3	54	188	42	14	2	1875	1156	138	86	71	33	5	1	0	35	238	83	4	1	10	23	34	128	173	0	8	431	23	143	7	8	4	285	185	2	516	246	595
1	4	63	6	19	49	172	895	226	485	635	1	56	178	47	3	3	1812	1149	171	111	70	25	2	1	9	43	236	97	7	3	8	19	37	175	184	2	9	420	30	133	15	6	9	295	175	4	697	251	572
0	7	68	6	10	48	185	888	217	484	633	2	53	201	40	17	6	1763	1190	180	92	77	40	4	1	11	40	220	111	5	0	5	28	30	175	190	2	8	427	27	122	14	4	4	306	162	1	654	265	574
2	4	53	4	18	49	159	846	219	500	605	0	57	178	38	11	5	1784	1211	200	86	78	43	5	1	3	52	246	73	5	2	5	19	39	149	200	1	8	397	18	150	9	10	7	286	194	1	651	274	585
2	8	51	3	10	43	164	821	231	487	588	1	58	170	41	16	5	1649	1124	192	87	69	33	8	3	8	41	228	106	3	4	6	18	30	161	187	5	5	390	30	154	5	6	9	288	171	5	644	267	579
1	8	53	4	22	55	155	788	202	471	598	1	62	182	45	7	4	1659	1113	165	87	73	33	6	1	4	33	251	100	1	2	8	21	26	165	168	2	8	390	18	128	10	6	4	272	184	3	597	260	556
3	6	39	6	16	45	182	736	198	509	633	1	69	192	37	11	3	1687	1060	158	83	83	37	3	2	13	43	241	83	4	2	12	24	23	142	181	5	6	385	28	143	12	2	4	313	171	4	601	235	524
1	2	59	2	16	45	171	812	180	525	620	0	70	192	46	13	8	1727	1071	167	88	80	42	6	0	7	33	222	82	2	0	9	23	22	152	188	4	9	386	23	120	10	4	8	322	150	3	599	298	540
2	6	71	7	25	42	169	693	163	457	606	2	49	194	58	7	3	1544	1132	149	70	93	27	4	0	5	34	245	88	2	1	10	25	28	132	159	4	5	418	33	136	9	6	3	337	188	2	512	238	494
2	1	68	5	22	45	165	812	211	474	645	1	66	198	43	9	4	1759	1179	204	80	76	41	11	1	6	44	239	76	2	1	6	27	27	180	186	4	2	381	38	139	15	6	3	339	148	2	660	303	473
2	9	57	2	23	62	157	761	191	467	605	1	54	261	31	9	6	1657	1186	170	87	70	47	5	0	2	40	274	87	3	2	9	21	31	163	172	3	5	415	29	149	15	7	8	368	171	0	586	256	481
2	6	59	6	21	54	172	915	208	474	581	1	47	234	41	6	3	1790	1204	188	89	84	48	4	0	5	34	233	87	7	2	7	24	33	186	172	4	8	401	40	155	16	4	6	351	202	2	658	284	533
1	5	68	4	22	49	170	814	187	466	526	2	48	235	43	11	0	1743	1223	169	92	70	36	9	0	2	34	261	93	3	2	11	29	27	157	181	5	6	404	34	136	16	1	6	398	188	3	607	271	487
2	3	59	5	10	54	168	880	221	467	604	1	48	235	29	9	2	1631	1202	187	95	73	46	3	0	3	37	237	76	4	0	5	21	42	189	198	3	7	403	26	142	11	3	4	415	188	3	643	276	473
1	2	56	5	8	50	194	854	208	435	577	1	59	207	45	11	8	1555	1176	183	90	88	45	4	1	4	29	223	88	7	1	6	26	27	181	218	2	4	418	37	143	12	4	5	473	174	3	638	332	475
2	7	75	5	19	44	153	839	198	425	615	0	52	218	43	21	3	1599	1160	167	104	85	43	3	1	8	39	250	82	3	1	6	17	23	177	187	2	9	393	28	147	8	1	1	490	168	1	685	276	467
1	2	75	4	19	51	169	757	181	434	560	0	64	215	28	7	2	1540	1217	175	76	86	50	5	0	5	33	231	86	2	1	9	20	35	166	168	3	17	384	33	151	12	4	8	470	177	3	610	260	429
2	8	87	5	6	63	160	768	219	425	552	0	61	237	47	11	3	1617	1209	172	113	84	43	5	5	5	46	246	95	6	0	6	19	22	154	194	5	4	402	29	143	13	6	8	467	161	1	614	310	501
1	3	61	7	10	46	161	870	228	434	551	1	48	232	40	9	3	1656	1248	212	80	89	42	3	0	6	33	252	109	7	0	10	22	29	176	214	3	8	432	27	151	15	6	8	479	165	2	675	278	445
0	4	81	6	16	40	142	728	180	410	556	3	61	207	52	12	2	1581	1190	173	78	71	34	6	2	8	31	251	113	5	0	8	23	26	183	145	5	5	424	33	146	11	4	5	441	172	1	605	272	451
1	7	73	4	18	50	151	828	200	410	527	1	48	237	31	10	2	1697	1224	201	92	75	39	5	1	5	37	240	99	5	2	11	35	22	215	172	3	6	406	35	143	9	3	5	498	157	0	640	322	438
2	7	71	7	20	54	149	779	211	445	494	1	47	204	52	7	2	1544	1138	173	88	59	26	2	1	6	43	236	107	6	0	9	21	29	181	175	2	8	406	20	138	14	2	4	433	174	7	660	280	443
1	6	84	2	8	37	153	685	158	404	491	1	47	194	44	9	2	1607	1211	177	77	77	27	6	1	6	37	225	91	4	2	12	26	25	155	155	6	11	410	35	115	14	5	3	431	151	1	575	239	451
1	5	60	3	13	54	179	733	191	410	499	0	37	200	55	14	8	1504	1157	210	76	67	32	6	2	1	30	209	93	7	0	5	24	30	180	197	1	13	391	31	131	8	7	8	429	170	0	634	270	439
1	2	69	5	16	56	176	619	163	389	486	1	47	177	40	10	3	1469	1155	151	60	71	39	4	3	7	34	254	87	4	3	5	35	30	142	136	4	7	379	34	146	9	4	7	419	153	2	521	208	450
2	4	69	10	10	45	170	658	186	358	504	0	47	194	53	14	2	1524	1200	173	66	72	28	7	3	4	30	241	91	4	1	6	18	23	170	153	0	6	376	24	143	19	6	6	433	170	4	541	234	460
0	5	92	7	15	54	145	658	165	389	518	3	51	206	50	10	2	1462	1196	161	78	63	38	5	0	5	32	233	89	4	2	7	24	29	153	152	3	9	387	29	134	18	1	9	470	172	1	514	230	433
1	6	61	8	14	57	143	594	155	369	490	0	55	206	56	7	4	1571	1134	137	66	80	34	6	0	10	31	248	87	6	0	10	21	25	113	149	4	5	364	40	136	11	11	4	445	167	3	454	193	440
1	4	88	11	20	50	150	575	149	382	498	0	63	220	46	14	3	1504	1157	153	60	65	37	6	2	7	39	220	87	4	1	2	22	22	149	153	4	2	383	31	125	15	5	8	413	164	3	432	194	431
2	7	77	5	19	45	152	450	108	381	505	2	42	206	48	8	4	1442	1223	103	68	68	23	8	2	7	25	257	99	2	1	5	31	25	109	102	1	9	378	21	119	23	7	6	398	158	1	326	171	474
1	10	63	6	14	53	135	634	130	415	484	2	51	167	44	14	3	1553	1195	150	72	64	38	3	2	4	26	217	110	4	2	8	27	31	129	146	2	10	385	26	136	8	7	7	452	148	2	490	202	461
0	9	72	4	20	48	150	532	161	377	491	2	45	189	33	14	5	1461	1240	136	60	58	31	3	0	2	37	227	94	5	0	9	27	38	131	118	4	8	363	36	128	16	3	3	441	164	2	415	176	446
0	4	79	5	20	65	140	535	159	339	496	1	56	211	40	9	1	1609	1199	139	63	62	24	3	0	3	29	248	83	6	2	8	28	26	117	139	2	8	369	30	145	14	6	7	473	172	2	437	184	490
3	7	82	6	11	64	140	608	156	347	482	1	47	178	47	13	3	1453	1139	172	58	53	27	4	2	5	21	255	104	2	2	9	26	23	113	142	2	3	384	15	138	18	4	4	404	170	2	488	202	498
0	1	73	5	19	50	130	572	163	374	464	1	48	171	50	6	5	1459	1163	148	76	52	19	3	1	3	38	258	103	4	1	5	22	28	147	124	3	4	401	38	121	22	5	5	435	137	1	475	190	471
1	5	73	2	22	51	140	588	183	403	472	4	62	183	51	11	2	1431	1137	164	75	63	28	7	2	2	26	253	89	4	2	6	25	31	129	140	4	12	380	26	117	21	4	5	416	168	3	512	203	501
3	5	78	9	18	52	123	598	145	355	453	0	47	189	46	8	5	1467	1172	138	78	73	36	6	3	7	26	230	94	6	2	6	32	27	126	146	1	11	404	24	128	15	6	13	407	173	3	457	180	441
0	7	75	8	13	40	130	562	171	349	421	0	56	190	41	13	1	1430	1153	150	68	74	21	4	2	6	32	220	88	2	4	7	24	26	147	138	1	7	389	40	117	28	2	9	408	185	2	508	194	455
1	7	78	6	27	36	142	575	154	358	437	1	55	191	39	8	4	1445	1051	182	67	66	30	6	0	4	30	241	92	1	2	8	28	32	166	128	4	9	377	18	120	19	8	2	384	157	3	501	206	444
0	6	73	7	18	55	158	434	119	338	465	0	49	194	42	20	2	1388	1127	126	53	67	35	6	2	7	35	212	89	5	5	4	21	17	105	106	1	6	374	26	118	14	11	10	381	138	6	346	164	493
1	8	78	2	20	48	127	580	179	396	417	3	60	183	48	10	2	1371	1150	159	86	70	23	4	0	1	22	236	82	2	1	2	32	28	137	150	5	16	353	23	129	14	1	7	386	172	1	509	200	503
0	5	78	5	11	64	154	626	208	333	447	2	49	168	49	10	4	1448	1047	173	73	54	34	2	0	2	30	236	101	8	1	5	18	27	134	160	3	8	359	24	132	11	7	6	403	155	4	532	199	498
1	4	81	6	19	51	123	598	169	398	486	2	56	199	38	5	0	1459	1137	184	66	74	30	2	0	6	36	215	101	1	4	5	16	27	150	148	0	10	352	27	124	14	2	4	393	145	5	501	223	512
1	6	66	8	14	50	140	608	158	374	472	1	50	201	31	11	4	1339	1124	159	83	69	25	8	2	2	31	208	111	4	3	6	23	33	148	156	3	13	375	14	169	17	5	7	514	148	1	528	240	491
0	4	77	4	14	52	135	438	103	358	479	4	53	212	38	9	2	1411	1057	128	46	52	25	4	2	4	22	215	85	2	0	9	24	20	106	92	2	10	361	27	130	8	4	7	392	170	4	374	148	441
0	7	81	3	23	58	125	621	196	368	411	4	41	193	29	16	2	1436	1115	190	104	67	21	7	0	1	34	191	106	5	1	4	24	20	152	172	1	10	352	21	154	11	8	7	398	148	1	535	237	470
1	9	82	6	10	55	143	568	168	403	456	1	50	190	36	16	1	1434	1104	161	93	71	20	6	1	2	20	228	91	0	4	3	22	27	136	138	3	10	358	19	129	14	2	8	388	141	3	508	204	444
1	5	80	5	13	56	116	632	189	371	475	1	58	198	36	10	2	1416	1082	196	77	64	27	6	2	4	24	195	101	2	1	4	18	13	172	137	4	13	383	32	127	14	5	5	378	143	1	526	216	467
6	7	88	5	18	54	109	654	191	350	427	0	36	186	35	6	4	1352	1092	188	90	71	27	6	1	1	23	219	84	4	0	2	20	18	162	149	0	9	385	26	119	9	6	4	411	144	6	569	227	481
1	7	56	1	10	40	138	696	228	380	459	2	36	194	30	21	3	1327	1024	211	90	68	25	6	4	5	25	207	73	3	2	6	13	22	157	166	2	10	368	30	130	8	4	11	384	157	2	617	242	457
2	7	70	4	23	34	108	625	189	349	459	4	47	188	30	11	5	1360	990	171	85	72	25	5	3	1	38	221	72	1	2	4	18	27	155	136	0	12	367	34	127	17	5	3	399	160	2	547	246	481
0	4	83	8	14	40	136	714	203	367	439	0	43	195	39	14	0	1277	1003	199	97	53	23	8	0	3	26	218	90	2	0	4	25	24	180	171	2	6	396	29	128	14	8	7	366	158	2	608	287	476
1	11	84	3	11	46	129	757	208	318	465	0	51	170	38	12	2	1232	995	217	85	56	28	5	1	6	24	204	74	1	1	5	21	15	179	145	2	9	401	28	141	14	7	7	402	137	2	660	268	438
1	5	70	3	9	41	147	772	206	358	439	2	51	170	41	11	3	1253	990	205	95	69	19	10	1	5	18	217	94	1	1	4	16	22	185	172	5	4	403	14	126	13	4	8	384	151	4	652	279	426
1	6	77	2	11	43	131	761	240	335	372	2	39	173	50	12	1	1268	1008	218	96	48	29	2	1	5	32	221	74	8	0	5	17	27	182	191	5	15	396	21	113	12	10	4	390	119	4	753	273	469
0	2	74	4	10	35	136	814	219	334	401	1	49	161	41	8	2	1256	1009	217	115	57	32	7	0	4	33	203	86	2	1	4	19	26	202	173	4	4	380	20	109	10	4	8	370	137	3	694	300	507
0	6	78	1	16	34	116	709	211	366	436	3	54	148	44	12	4	1286	1084	189	96	52	23	3	1	8	26	227	75	5	1	4	22	26	164	160	2	13	394	25	112	17	6	6	373	136	3	641	267	540
0	3	76	10	21	37	142	911	278	340	428	1	42	149	63	12	3	1259	1010	253	123	64	34	4	1	6	23	210	73	1	0	4	19	19	238	209	3	7	385	24	107	15	5	8	352	142	1	826	353	470
1	4	61	5	10	47	134	951	251	343	399	2	44	148	45	13	3	1272	1083	277	119	65	37	5	2	4	29	226	76	0	1	5	22	28	219	232	3	7	368	17	109	12	5	11	342	171	2	900	373	431
1	6	87	3	18	43	120	905	306	313	406	1	48	153	63	18	3	1211	1077	250	124	50	24	9	1	4	21	219	94	2	1	3	18	24	239	223	2	13	404	22	114	15	4	5	362	144	5	874	384	499
3	0	80	6	10	60	110	940	280	324	405	0	49	172	49	11	1	1216	1025	260	118	61	32	7	1	1	30	249	88	1	0	0	27	21	206	225	2	7	391	29	129	11	5	5	324	162	2	895	316	503
0	3	77	2	10	44	113	1013	289	333	398	1	45	175	47	16	3	1338	1004	283	138	51	25	5	0	1	29	207	100	5	0	3	20	38	275	208	4	8	372	25	113	21	5	5	371	143	2	956	350	463
2	0	79	3	14	39	117	868	267	341	354	3	41	148	46	7	2	1280	1018	243	124	65	25	5	2	2	32	216	78	7	1	4	30	19	222	219	1	5	392	23	108	13	6	8	338	148	4	855	327	464
2	5	74	5	14	37	151	893	244	303	364	2	46	164	46	12	2	1342	1017	236	119	51	22	3	1	3	23	219	86	4	0	9	20	23	210	193	9	8	404	19	111	14	3	10	346	121	5	836	315	479
1	3	90	6	15	33	129	867	239	298	393	2	44	147	56	14	1	1244	976	272	98	64	27	8	0	3	29	212	101	6	4	3	28	22	206	190	2	5	395	22	119	8	5	8	343	148	0	829	307	494
2	3	80	7	13	38	127	824	220	274	358	3	47	175	52	12	5	1291	1015	220	115	48	21	5	2	3	28	220	104	5	1	6	21	31	206	190	0	11	363	26	135	7	3	9	349	152	2	761	298	459
0	3	82	1	16	42	137	839	235	293	357	1	42	166	62	12	2	1384	1041	267	92	46	27	2	2	2	19	228	101	4	0	4	19	33	211	184	5	8	389	23	123	11	2	5	398	155	1	795	290	440
0	2	65	1	12	53	130	645	199	333	373	0	42	164	58	10	1	1388	1041	187	101	51	31	6	1	5	27	262	89	0	1	4	16	20	157	148	3	7	422	26	134	14	1	11	385	151	2	603	228	496
0	7	71	2	10	44	113	838	201	343	382	1	34	170	56	18	3	1441	982	252	108	55	31	6	0	5	13	223	100	2	2	1	19	23	193	211	2	8	381	21	134	14	5	7	371	163	2	757	325	537
1	3	62	2	7	55	122	643	191	346	370	0	43	157	42	15	1	1467	1007	215	63	62	33	9	0	3	19	227	96	2	1	5	22	25	165	141	5	11	374	27	127	17	3	5	477	158	5	607	237	505
0	6	63	4	12	38	146	473	147	322	358	1	62	168	55	9	3	1320	1083	172	44	51	34	5	1	4	22	240	98	2	2	3	27	14	106	112	3	13	344	28	126	8	1	7	451	147	0	409	187	495
0	6	79	4	10	50	126	553	180	325	405	0	54	142	51	12	6	1360	1099	172	80	50	29	1	0	1	22	201	91	6	0	3	24	26	140	137	3	8	397	22	125	12	6	7	431	178	4	543	190	458
0	10	93	2	13	44	99	479	161	322	333	2	51	154	48	16	1	1387	1093	159	67	49	19	7	1	2	20	216	92	0	0	4	14	19	109	127	4	10	369	24	140	11	2	2	405	166	3	445	201	476
2	6	73	11	9	46	109	680	187	363	346	4	47	156	54	10	3	1422	1190	222	73	49	29	8	0	2	15	218	95	3	0	1	28	22	160	166	1	13	349	23	140	9	4	5	387	194	6	619	271	442
2	7	74	5	13	40	136	651	228	315	350	0	53	183	47	11	3	1398	1195	222	79	49	29	3	0	3	32	196	108	3	2	2	16	22	171	165	3	10	347	17	129	14	7	6	401	172	1	590	241	412
2	3	74	2	12	52	128	694	196	315	335	0	54	173	45	10	6	1418	1212	226	93	46	32	8	1	2	27	201	95	5	2	4	20	28	151	160	4	11	346	20	138	17	3	5	396	159	3	595	228	436
1	5	66	2	14	45	125	630	181	333	372	2	50	154	59	15	1	1374	1191	206	77	49	33	3	2	2	27	191	87	5	0	6	31	23	169	140	0	4	364	23	115	22	9	9	371	154	3	551	222	447
2	6	76	4	18	32	107	511	160	338	347	1	50	158	66	14	3	1380	1206	158	84	61	37	4	3	3	29	186	107	2	1	4	14	26	111	138	7	10	360	27	109	14	3	6	420	145	2	496	156	477
1	6	72	5	24	49	109	471	167	326	368	2	70	175	56	17	6	1312	1147	162	57	47	24	6	0	8	22	222	105	2	6	8	16	38	101	133	1	10	369	24	107	18	10	9	396	144	2	422	163	481
2	3	68	5	12	40	110	494	167	325	357	3	39	136	81	10	4	1440	1174	167	77	62	18	6	0	3	28	227	102	3	0	6	23	13	132	126	4	9	380	26	110	16	3	5	400	150	3	422	186	459
1	9	75	7	10	40	104	539	169	329	346	0	35	134	66	12	5	1308	1204	183	72	45	28	4	1	1	22	250	76	4	4	2	23	29	146	130	4	16	366	18	112	16	8	8	402	138	3	472	179	499
0	3	63	2	17	52	110	469	131	333	344	0	45	148	52	12	1	1332	1150	138	59	51	17	5	0	3	25	224	104	2	0	3	17	25	116	110	1	6	342	34	128	14	9	6	388	161	2	355	152	471
2	2	62	5	23	41	110	476	145	331	392	1	40	134	83	11	2	1380	1198	146	60	59	23	9	1	2	23	241	118	4	2	3	15	31	139	86	1	9	362	28	126	16	3	5	411	141	0	386	176	443
1	4	56	6	12	45	112	495	167	329	382	1	46	136	78	13	2	1443	1183	152	70	45	18	7	0	1	23	205	100	2	1	5	13	18	125	118	1	13	344	24	123	14	4	6	402	160	5	385	189	465
0	4	76	5	13	35	110	456	151	328	421	0	52	141	80	16	0	1381	1250	151	74	68	30	7	3	4	26	251	97	3	2	7	19	25	121	125	2	7	377	24	119	17	3	5	410	179	3	392	182	497
0	5	77	4	8	45	118	538	162	305	348	0	53	144	80	12	2	1411	1147	171	71	61	19	2	1	3	33	229	114	0	1	4	16	21	117	141	0	14	364	31	129	9	6	9	411	149	4	471	168	451
0	0	63	5	13	49	102	485	136	314	377	1	58	136	77	13	3	1324	1152	139	59	55	24	7	0	7	24	258	103	5	2	3	16	25	106	103	1	12	368	16	108	18	8	16	427	179	1	346	146	464
1	7	81	2	15	38	124	400	136	340	402	1	60	131	69	11	4	1298	1299	138	50	43	22	6	3	7	25	246	90	0	1	5	23	29	104	95	2	9	381	15	149	15	6	7	388	170	1	344	139	462
0	4	59	2	23	47	92	448	136	338	399	2	42	145	72	11	4	1327	1292	160	62	57	27	7	0	2	22	255	113	2	2	3	22	25	114	104	2	10	375	35	124	9	10	12	397	163	4	371	165	456
1	7	65	2	12	47	97	536	182	329	377	0	47	117	66	14	2	1301	1322	182	61	52	28	9	1	1	23	248	99	2	0	2	33	24	131	129	3	12	363	38	133	12	3	5	371	137	3	438	192	429
2	10	58	3	17	29	107	349	97	378	402	3	51	132	90	17	4	1365	1256	108	48	59	23	6	0	5	27	250	98	0	4	0	20	22	85	83	4	11	348	28	120	15	2	7	393	151	3	293	104	412
1	8	64	3	14	49	120	446	116	346	364	1	46	134	67	11	3	1430	1293	142	55	62	26	10	4	3	24	250	87	2	1	8	28	32	109	91	4	11	374	25	114	11	5	13	390	146	7	332	167	462
1	6	83	1	13	52	125	329	100	338	352	2	53	147	71	11	1	1398	1256	112	39	45	25	6	2	2	19	242	100	2	1	4	35	35	82	74	3	10	381	19	120	11	2	12	409	142	2	251	108	431
1	7	68	5	19	50	113	463	140	340	379	0	50	136	69	11	2	1248	1268	156	62	52	30	3	0	3	19	234	107	4	1	1	18	30	123	118	1	6	368	29	129	16	6	10	420	128	5	413	167	470
0	5	77	3	23	39	130	351	110	359	383	1	47	162	57	6	4	1283	1250	117	41	62	27	5	0	3	19	220	115	2	1	5	17	22	87	91	4	6	361	19	117	14	6	11	433	151	4	312	117	459
2	7	65	1	12	37	105	361	153	362	395	1	52	150	52	12	2	1207	1218	143	30	58	35	6	2	3	14	250	87	5	1	3	25	28	100	102	2	16	363	24	112	16	10	7	425	149	4	328	133	428
0	6	76	6	10	48	120	404	140	367	411	1	40	128	76	12	0	1119	1203	125	44	69	22	2	2	1	17	251	88	6	1	6	22	27	87	94	4	17	355	26	114	15	3	11	409	145	5	337	121	452
0	6	68	1	13	49	117	470	150	382	367	2	59	173	53	18	3	1175	1154	162	47	46	33	5	0	2	28	253	124	1	0	6	27	30	117	99	6	5	370	22	121	12	4	6	397	143	4	390	163	501
2	6	65	7	20	37	116	478	165	362	400	0	38	144	59	6	4	1146	1120	155	50	54	31	4	1	1	27	249	100	3	2	0	19	38	112	112	4	16	357	34	110	15	3	7	403	146	3	406	138	477
0	4	68	5	19	36	110	449	132	379	419	2	34	133	67	15	4	1174	1179	139	57	63	30	3	2	6	31	250	115	3	3	10	34	29	116	117	3	8	368	23	115	9	4	5	385	173	2	374	158	486
0	2	59	5	15	37	95	451	169	367	397	0	43	148	59	16	5	1042	1090	136	53	58	24	6	0	8	28	232	101	1	1	4	31	35	110	104	1	13	374	25	111	17	10	10	394	131	6	361	147	481
0	5	62	0	13	40	110	425	119	343	401	1	42	137	67	10	4	1053	1136	135	45	65	29	10	0	5	23	248	102	1	1	6	25	26	86	113	4	11	382	21	113	12	8	2	427	132	5	362	141	491
0	2	74	1	20	35	123	339	105	398	399	0	37	149	57	7	3	1093	1167	110	35	69	31	5	0	5	25	260	117	2	2	3	28	19	71	87	5	11	372	22	104	10	4	6	445	128	3	243	112	471
0	2	61	5	9	35	88	379	167	401	413	0	43	137	66	13	2	1069	1177	119	45	62	28	4	1	4	24	230	117	3	2	6	28	22	115	75	5	13	356	22	110	13	2	5	460	148	1	363	131	467
1	7	59	1	10	46	121	572	185	369	350	3	43	162	43	7	1	1049	1167	170	65	62	29	7	0	3	30	255	103	2	3	2	30	29	134	130	2	5	345	23	107	12	4	8	469	134	2	470	173	470
0	6	64	6	13	55	114	271	99	358	355	1	33	154	54	14	7	1122	1190	85	36	56	29	2	3	2	18	240	109	2	2	5	37	33	69	56	3	12	334	24	100	13	8	7	449	140	3	227	96	414
0	3	54	4	15	38	121	395	129	359	366	0	52	147	54	12	5	1044	1167	113	40	72	30	5	2	3	23	241	122	1	0	0	29	30	100	77	2	8	343	24	113	14	9	10	441	132	2	309	127	408
1	6	62	4	15	51	128	403	153	339	355	3	36	146	54	10	2	1082	1126	124	57	61	31	5	5	4	22	244	106	1	1	8	33	22	112	102	3	12	371	20	111	15	13	11	444	141	4	323	162	473
2	8	55	3	14	51	125	530	161	312	363	2	51	154	41	13	1	1065	1180	164	56	55	25	7	1	4	18	264	94	1	0	4	29	32	113	118	2	6	306	24	122	15	8	6	341	141	3	402	195	498
0	7	61	2	19	37	118	293	93	347	380	2	40	148	60	12	4	1041	1162	88	31	67	28	5	1	4	19	269	110	4	2	4	31	35	67	68	4	4	350	21	96	19	6	3	223	114	1	244	89	469
0	2	59	3	15	42	109	533	155	327	355	1	30	159	55	17	3	1042	1140	158	57	54	23	8	2	3	24	273	97	2	1	5	29	30	131	109	3	14	353	23	96	17	5	12	323	126	7	405	174	446
0	7	66	8	18	50	132	376	138	384	331	1	38	186	53	13	3	1097	1153	110	48	56	38	5	2	2	19	277	106	3	0	4	31	26	82	78	1	10	340	24	114	17	8	10	435	133	4	286	128	489
0	0	59	5	17	52	112	378	107	360	354	0	46	183	48	15	1	996	1125	103	48	51	32	8	0	6	28	267	95	0	1	2	28	29	88	87	2	7	333	16	104	8	4	13	356	119	4	286	110	440
0	3	64	2	11	46	114	452	154	401	349	2	48	183	39	11	5	1091	1204	132	67	55	24	7	2	4	26	275	100	4	0	6	30	28	113	97	1	11	316	31	127	12	11	6	387	138	3	367	160	466
0	6	59	6	12	40	118	203	76	345	370	2	36	186	26	11	2	1084	1203	59	16	58	39	5	1	6	22	254	115	6	0	3	24	31	61	46	3	9	331	21	133	12	4	11	403	147	5	165	81	450
0	3	70	1	15	43	118	333	116	360	361	1	41	184	50	11	1	1065	1116	94	26	52	23	7	3	3	23	259	122	4	1	6	30	24	61	64	1	8	352	28	123	16	8	6	392	132	1	229	108	439
0	4	68	1	16	29	121	340	127	375	356	1	37	195	37	14	2	987	1140	92	47	64	30	2	1	0	17	242	117	3	2	2	30	27	90	72	2	10	339	28	110	16	7	8	415	130	2	281	105	449
2	5	61	2	19	42	132	437	160	342	334	1	46	207	36	8	1	1032	1120	125	48	60	36	9	0	3	27	261	106	3	1	6	24	18	113	100	3	13	351	17	121	12	8	5	393	150	2	346	154	433
0	2	61	3	20	34	111	229	78	363	350	2	46	188	47	11	4	1033	1178	73	24	49	32	13	2	2	23	253	92	2	0	5	25	39	54	58	2	14	331	26	137	16	8	14	441	125	4	204	76	426
0	3	71	1	12	42	121	321	119	366	328	0	44	185	33	11	1	921	1131	87	29	62	23	6	3	4	29	260	93	1	1	2	22	35	59	83	2	8	337	28	109	17	7	11	406	117	2	264	106	447
2	6	52	8	16	45	118	376	144	354	342	1	34	173	42	10	1	848	1127	113	31	55	38	8	3	5	23	245	114	0	0	4	21	22	91	76	1	5	339	19	115	17	5	8	407	137	5	303	133	396
2	3	59	3	11	52	117	169	76	364	338	1	33	201	38	11	0	893	1121	55	16	40	31	6	2	2	22	270	105	3	1	4	33	22	46	37	2	9	324	17	114	11	3	2	406	143	3	151	74	428
1	2	62	4	22	47	101	250	85	326	322	1	36	205	37	15	3	953	1109	78	27	48	28	7	1	3	18	244	99	1	2	4	31	24	57	57	2	5	306	24	104	16	10	8	424	120	7	186	83	433
1	6	61	3	9	45	105	341	114	306	390	2	34	178	27	13	6	902	1124	93	28	53	36	4	1	2	18	240	108	0	3	2	28	26	85	74	2	8	318	11	104	11	5	9	409	103	2	283	128	447
2	2	61	5	20	46	131	355	107	307	317	2	39	194	41	14	3	857	1071	89	38	49	29	6	0	4	22	308	99	2	1	6	30	26	72	74	4	10	335	11	103	10	6	12	386	113	3	283	98	427
0	1	45	4	15	40	126	314	109	335	374	2	34	195	39	11	2	984	1165	88	17	58	30	12	0	5	17	276	106	0	0	4	34	34	65	71	1	8	330	14	110	16	11	7	406	154	4	262	98	407
0	2	56	5	9	41	116	285	81	310	334	1	29	208	45	16	2	1017	1078	77	18	53	32	6	3	3	22	235	119	2	4	5	27	28	62	60	2	5	320	15	98	19	3	13	439	160	8	216	77	451
1	2	54	4	11	41	98	201	86	330	359	0	43	200	36	14	3	1029	1060	52	19	60	25	2	0	2	34	236	110	3	2	5	24	27	36	56	5	8	312	14	95	12	7	7	468	151	4	177	52	436
1	1	57	5	20	44	100	447	136	308	339	1	43	182	39	10	3	963	1117	124	42	58	25	8	2	5	16	253	104	3	2	4	30	29	92	106	1	10	321	22	110	14	17	9	448	170	7	363	149	429
0	0	43	3	9	29	85	128	46	334	315	1	36	214	40	16	5	974	1158	35	12	59	29	7	1	3	22	249	111	0	1	5	25	29	39	29	2	10	352	15	99	6	6	13	462	162	4	110	50	417
1	5	50	8	12	37	108	323	107	317	325	2	27	181	39	6	0	924	1108	94	16	61	35	11	2	5	26	236	126	0	2	2	29	22	70	65	2	12	315	17	92	13	6	12	471	138	3	273	102	421
0	6	50	0	10	39	84	411	135	359	331	1	39	181	34	9	3	936	1113	105	52	65	34	5	2	0	18	255	103	2	0	8	23	24	104	95	0	9	347	10	87	21	7	13	457	136	1	351	148	425
0	4	51	5	12	29	100	301	111	325	302	1	37	181	48	8	3	945	1154	80	29	46	27	6	2	4	23	235	102	2	0	9	26	30	89	62	2	3	335	11	92	13	8	11	464	150	2	269	88	416
2	5	63	6	12	47	98	233	85	339	319	1	34	197	45	8	2	976	1074	64	21	57	31	9	2	2	23	239	94	0	1	8	27	24	62	42	2	7	342	9	93	17	2	9	419	157	6	182	82	395
0	2	48	4	11	28	93	293	93	296	343	1	29	160	41	12	2	908	1124	74	37	56	27	7	0	4	19	239	102	0	2	6	29	28	79	73	2	13	329	7	86	15	9	6	408	155	3	271	84	398
0	3	57	2	13	40	98	267	94	347	291	2	34	177	52	10	4	773	1102	70	17	61	27	6	0	5	22	247	92	2	1	5	27	29	61	69	4	6	333	12	97	10	4	6	350	133	6	205	76	401
0	4	54	4	7	32	112	218	74	292	261	0	40	187	36	14	4	861	1086	58	24	58	24	6	1	4	24	255	93	0	1	3	25	41	56	49	4	9	329	15	89	17	7	6	392	140	4	208	77	430
2	3	61	8	9	44	82	336	121	302	290	1	30	171	52	6	4	824	918	87	26	54	30	4	2	2	21	245	106	1	2	4	27	21	79	73	2	6	345	16	91	9	3	9	437	125	2	288	120	400
0	4	63	0	12	31	110	217	77	309	307	1	37	195	48	8	1	872	1054	55	16	60	34	5	0	2	20	267	89	1	3	6	32	28	41	57	1	7	345	14	86	9	7	11	463	128	5	175	56	377
0	2	53	3	17	41	102	278	83	345	358	0	26	172	50	9	4	773	1089	82	24	67	28	4	0	4	19	276	107	2	2	3	20	31	63	65	2	13	337	4	93	14	8	8	409	126	2	248	94	336
1	1	52	7	14	42	95	300	92	303	305	0	39	178	35	6	3	800	1073	70	29	60	23	7	0	4	28	240	117	1	0	2	36	29	68	80	4	8	354	18	115	9	3	14	407	130	0	253	98	367
1	5	45	3	15	37	95	272	91	343	311	1	33	191	48	13	2	836	1036	59	25	72	29	5	2	3	27	237	110	2	2	3	19	32	47	56	1	6	337	17	89	10	7	8	405	132	2	219	88	422
1	4	50	2	11	36	95	336	124	372	363	1	37	197	42	13	4	866	1068	93	24	69	32	6	0	2	26	281	120	4	1	2	26	34	82	72	4	14	339	10	99	18	5	7	421	149	4	232	123	409
0	6	46	4	17	43	97	274	102	313	352	2	33	187	47	10	1	829	1131	78	26	66	42	3	1	8	32	289	115	0	2	3	29	39	79	58	5	8	337	16	106	7	9	11	395	138	3	251	85	397
0	3	58	3	16	34	89	213	82	311	370	0	36	164	47	12	1	804	1152	58	20	70	34	8	1	2	25	297	126	0	1	6	30	41	47	57	3	11	341	18	92	12	4	9	448	124	5	176	69	383
0	4	59	2	9	48	95	301	103	363	354	1	36	189	45	10	3	792	1138	78	33	86	37	8	1	2	31	314	123	2	1	6	28	35	74	75	3	13	335	13	100	11	5	6	400	132	2	253	88	398
1	3	52	4	9	33	115	321	108	364	328	2	34	176	48	8	3	804	1056	99	35	53	46	2	1	2	18	308	110	1	2	7	26	33	85	74	3	7	359	18	84	13	7	10	425	129	2	294	90	329
0	2	66	4	14	30	95	298	111	331	314	3	35	174	51	13	3	697	1048	80	31	69	36	7	1	3	24	307	102	2	0	2	28	29	76	76	2	9	338	11	112	6	3	5	411	130	7	263	109	351
0	2	66	5	11	32	83	266	79	327	312	4	32	174	52	8	4	781	985	50	28	53	24	8	2	2	25	302	116	1	0	2	27	31	52	68	2	15	346	15	89	9	5	5	436	123	4	202	77	362
0	2	66	2	16	34	106	235	105	363	350	0	31	165	37	15	1	731	1043	69	25	61	36	10	0	2	26	269	100	2	3	6	23	26	48	70	2	8	322	19	100	5	4	9	406	128	3	203	83	327
1	4	53	2	9	32	81	270	84	324	333	0	51	189	42	18	2	624	1048	76	22	56	36	5	0	2	33	257	97	1	1	3	32	31	55	50	3	11	354	18	101	12	4	9	357	117	4	224	86	378
1	3	37	3	15	22	88	368	135	360	308	0	26	167	43	11	3	807	1028	92	22	58	34	7	1	5	19	274	103	1	2	4	28	37	89	79	3	4	344	13	94	9	8	8	440	128	8	295	114	337
2	1	51	3	11	38	84	263	84	345	314	2	37	170	39	6	0	792	1029	64	23	72	29	13	1	1	22	267	96	1	1	5	28	26	58	70	2	11	351	13	89	14	5	8	449	138	3	236	66	330
0	3	59	6	8	29	79	233	88	340	311	0	25	167	43	13	2	766	1038	53	14	54	34	6	2	5	22	245	90	2	2	5	23	40	48	55	2	8	365	7	90	12	6	8	465	129	1	164	68	355
2	1	57	2	10	37	106	293	112	338	305	5	33	177	41	4	4	812	1041	81	28	61	35	11	1	4	21	220	80	4	1	6	27	30	61	80	0	17	348	13	80	3	6	5	415	139	3	273	97	373
0	4	45	2	14	26	91	286	109	351	328	1	20	179	42	15	3	783	1084	67	27	53	35	5	2	5	30	248	97	2	0	4	23	26	70	73	5	14	341	11	82	11	4	7	406	117	3	241	79	321
0	4	46	4	14	25	93	197	69	347	308	3	25	153	44	22	2	767	1138	48	20	59	32	4	1	3	26	186	65	5	0	4	36	25	46	38	2	10	354	19	66	8	3	7	385	120	4	152	52	294
1	3	55	4	6	38	82	343	139	365	320	1	24	137	55	10	3	807	1093	77	33	57	41	10	2	4	25	238	100	2	0	5	28	31	86	70	2	5	364	13	95	11	2	7	376	147	2	272	100	342
0	4	56	7	14	29	80	203	59	282	227	2	31	141	45	6	3	845	939	53	12	39	28	7	1	3	22	251	81	1	2	3	27	25	50	43	3	10	356	27	89	4	2	9	388	137	3	157	74	375
0	2	41	3	7	33	74	225	91	325	339	1	22	168	39	5	3	787	787	54	15	60	36	7	1	2	20	227	91	2	4	2	21	29	54	47	3	8	355	9	87	4	2	4	389	157	4	188	64	306
0	5	59	4	11	31	93	353	127	326	360	0	20	156	41	10	2	848	971	84	38	58	34	4	2	3	16	212	95	1	1	2	21	25	79	79	2	11	364	10	80	7	1	8	377	118	3	257	107	313
3	2	60	1	14	31	85	302	104	326	335	3	27	167	37	10	3	815	988	67	30	60	30	8	1	2	26	265	82	2	1	6	18	37	81	53	2	11	349	24	76	8	2	12	345	139	6	262	89	296
1	3	40	1	10	41	91	234	85	363	327	0	25	148	56	16	4	728	893	53	11	69	38	5	2	3	18	245	104	1	0	6	18	36	47	49	6	5	354	19	113	7	4	3	338	102	4	165	75	352
2	4	46	6	10	34	89	323	123	323	291	4	28	153	48	13	2	729	924	87	34	46	28	5	1	2	26	235	88	2	3	3	28	25	75	77	5	5	349	11	79	8	3	7	381	107	2	249	106	317
0	2	58	5	13	34	68	297	97	331	334	1	29	149	53	11	1	721	952	51	28	49	28	4	1	3	19	253	116	2	1	3	27	29	71	65	8	15	361	17	93	6	3	10	394	108	3	205	90	320
0	3	50	4	9	29	78	310	120	342	306	1	26	139	63	11	2	758	911	67	26	57	41	8	1	6	25	253	115	2	1	6	23	28	72	78	4	15	360	13	93	5	1	6	402	123	1	241	91	334
0	2	43	4	12	27	82	285	87	319	318	3	37	185	42	4	2	757	931	52	20	53	27	7	2	0	24	278	101	1	3	1	23	35	62	67	3	12	360	16	87	6	8	7	381	106	4	209	77	310
1	1	55	3	9	34	96	339	122	312	312	2	36	187	41	8	4	737	920	70	26	52	35	8	1	6	15	265	99	2	2	2	18	25	77	70	6	8	358	13	86	8	1	6	401	111	2	228	108	351
0	1	46	3	13	42	86	325	110	304	348	4	32	154	54	7	1	676	904	59	26	52	36	9	1	3	26	270	110	1	1	7	16	27	61	82	2	12	377	10	106	7	1	6	375	112	3	240	88	327
0	1	33	10	17	24	72	295	109	334	324	2	42	169	60	8	1	734	952	69	29	73	36	9	1	4	19	285	122	2	0	5	14	28	69	68	1	6	359	18	91	8	4	4	392	125	1	200	95	318
0	5	51	5	19	23	71	212	66	318	284	2	31	146	56	14	1	739	940	42	17	63	35	3	3	4	17	295	109	0	0	2	25	25	40	46	1	17	359	14	78	10	2	4	392	132	5	137	62	317
2	2	55	2	15	43	71	363	121	337	317	3	31	141	56	13	2	680	936	89	33	59	38	3	2	1	25	347	126	2	1	6	16	33	87	83	3	3	353	18	107	9	2	10	374	121	4	269	126	287
0	4	45	2	8	29	75	371	126	293	309	1	23	140	52	8	3	601	872	77	32	61	35	5	0	5	29	237	91	2	2	5	18	21	84	90	1	10	331	21	69	3	5	1	356	95	2	296	109	343
1	4	49	1	12	28	59	415	123	323	315	1	36	143	64	13	3	618	959	90	32	66	45	4	0	4	22	316	131	1	6	11	20	28	84	96	3	10	381	16	103	7	3	12	365	109	3	301	132	315
1	5	59	3	10	41	73	407	138	308	325	0	30	166	51	9	4	637	849	90	30	63	39	2	2	6	20	329	110	2	1	3	16	27	84	82	3	15	377	14	102	8	2	9	370	109	0	300	126	285
1	4	54	6	17	35	75	381	147	311	294	1	38	158	56	16	1	714	839	91	29	54	34	13	2	1	21	311	123	4	4	5	17	18	89	107	3	7	372	14	100	11	2	5	398	136	3	301	132	306
1	7	58	3	21	39	69	401	163	327	343	0	41	138	53	14	3	684	869	102	38	54	34	6	3	3	25	329	122	1	1	3	19	25	92	95	1	11	368	21	104	16	4	9	428	116	5	309	153	256
0	3	47	4	6	34	69	474	123	295	320	0	27	126	54	10	2	631	889	88	50	53	35	5	0	3	24	316	130	0	1	10	22	30	99	114	3	10	379	14	96	9	6	3	423	130	1	354	136	297
2	4	47	2	17	38	56	413	121	334	333	3	20	126	48	15	1	658	792	89	40	50	47	7	3	2	23	313	118	1	6	7	19	19	90	92	3	9	365	16	82	7	2	11	439	119	6	318	131	255
1	2	54	3	9	20	61	493	181	331	289	3	21	127	41	8	4	672	982	105	46	62	35	7	2	2	34	193	76	2	1	15	15	26	115	104	2	6	368	17	62	10	0	4	428	124	0	398	142	261
1	2	43	3	18	44	48	309	98	305	290	4	37	121	39	9	5	663	944	66	33	51	42	11	2	6	16	321	117	3	1	5	17	31	69	72	6	15	379	15	95	8	2	6	412	106	5	235	102	265
1	6	58	4	9	39	51	357	131	266	343	2	37	123	56	15	1	670	954	84	30	60	30	7	1	5	21	352	118	0	2	7	22	36	80	80	3	9	374	17	91	7	1	3	451	104	2	299	113	262
0	2	71	3	6	38	62	420	149	312	289	0	31	144	36	10	3	662	1011	103	43	52	24	8	1	3	26	298	109	1	1	6	18	25	92	106	3	8	370	23	96	5	1	6	457	122	4	315	153	273
1	5	49	3	8	39	52	433	170	307	298	2	38	131	46	5	1	646	935	87	56	51	34	6	1	4	28	366	114	1	2	5	15	25	110	104	3	15	347	8	97	7	1	9	418	128	4	379	143	230
1	2	48	2	7	24	56	448	138	312	325	0	24	114	49	6	2	556	949	89	45	49	49	6	1	2	25	265	94	0	0	8	22	26	108	95	4	16	369	19	80	7	4	6	398	124	3	365	146	237
1	6	41	5	7	38	55	455	162	282	286	1	29	113	58	8	3	599	974	99	46	59	38	9	2	1	24	309	107	0	2	5	25	37	107	98	2	6	362	20	89	6	1	4	385	112	4	360	160	223
3	2	59	0	10	38	54	451	162	320	325	1	30	96	49	11	0	613	1023	105	33	45	39	1	0	1	23	346	153	5	2	6	27	26	114	94	7	9	377	21	109	9	2	7	364	109	2	396	130	244
1	6	55	6	3	23	58	395	134	312	308	1	20	120	46	10	2	616	1059	97	42	57	32	7	1	5	28	231	79	3	1	7	28	24	95	96	2	11	357	17	53	7	0	5	395	104	2	327	134	227
3	4	56	3	16	39	47	487	164	295	330	2	22	100	54	9	4	664	1006	113	35	44	39	9	4	5	23	295	119	1	4	7	23	38	94	123	3	8	373	15	85	5	4	2	397	116	5	389	154	238
0	3	66	7	13	39	50	482	174	290	311	0	28	95	55	17	3	575	1014	106	51	56	40	9	2	3	28	300	111	2	2	3	30	41	111	109	2	7	364	19	65	12	2	4	412	116	3	414	168	218
0	2	56	2	14	39	61	441	178	301	280	1	17	118	60	14	2	616	1138	110	57	57	44	11	0	4	24	318	119	2	1	8	23	33	109	124	1	11	380	20	89	8	2	6	376	108	2	376	162	202
0	1	56	2	16	33	43	441	155	295	320	1	29	106	41	5	0	562	1031	110	43	57	31	6	2	8	30	290	135	2	0	6	19	49	102	108	4	8	369	17	81	3	2	4	355	121	4	368	150	207
1	1	59	6	10	27	50	430	176	292	295	0	25	97	52	15	0	549	1029	106	34	47	37	3	1	4	34	292	96	2	3	7	29	43	94	108	2	13	370	13	62	6	2	10	376	118	2	379	146	211
2	4	54	3	18	35	47	504	155	316	303	1	23	91	57	10	4	534	1019	126	57	59	42	7	2	6	14	306	128	0	0	1	24	34	110	115	3	7	374	19	85	9	2	3	345	107	1	408	185	215
0	4	55	3	10	32	48	504	192	268	315	1	23	97	53	10	1	554	1030	123	50	65	37	9	1	1	18	286	113	1	1	3	27	40	125	110	2	15	356	20	70	4	4	4	374	122	4	422	185	200
1	4	62	2	15	36	46	602	176	310	285	2	26	101	53	11	0	577	1120	146	45	55	34	7	2	2	17	307	88	2	1	10	24	49	134	129	4	5	374	21	73	11	2	5	363	104	4	516	164	198
2	0	44	2	8	22	44	563	185	289	281	4	33	88	40	18	0	479	1077	140	50	54	34	7	2	3	20	310	96	2	5	4	22	40	127	120	5	8	363	15	80	3	4	8	319	104	2	459	187	185
2	3	51	5	5	18	38	534	184	327	280	0	18	90	51	8	1	462	1032	131	51	73	33	9	3	3	27	240	73	1	0	4	25	60	121	142	2	9	362	11	65	2	2	3	352	106	6	471	157	212
0	5	59	2	7	29	59	558	195	331	252	1	23	92	50	7	4	615	1015	149	61	52	38	7	0	4	19	239	74	2	4	5	23	34	119	144	4	10	355	16	64	5	3	5	393	119	4	474	191	184
1	4	45	4	8	18	42	506	212	300	227	0	12	106	37	7	1	489	1021	117	49	45	34	6	2	8	16	198	68	2	1	3	25	39	132	113	5	12	356	22	36	6	7	4	380	111	2	439	167	196
0	2	73	3	5	21	54	503	148	305	266	2	19	77	39	15	3	553	1083	107	48	46	47	5	1	3	25	246	83	3	2	3	29	38	107	115	6	11	361	14	53	5	5	8	370	122	3	398	158	236
1	1	54	3	15	23	49	465	170	277	235	1	18	88	38	10	1	481	1095	129	38	51	38	7	1	5	33	299	98	2	0	0	19	42	109	132	5	12	373	12	62	7	1	3	334	113	3	436	165	200
1	4	49	6	11	26	44	470	162	273	259	1	21	101	36	11	5	512	1105	117	46	55	40	11	2	6	22	276	88	2	4	3	20	42	116	100	4	10	376	15	55	8	0	14	384	114	5	381	141	189
1	0	54	4	9	21	47	475	165	306	254	2	29	83	48	13	3	525	1068	117	52	62	38	9	3	9	23	302	92	4	3	5	21	43	114	123	1	15	383	21	64	8	3	10	415	110	1	406	164	198
0	2	58	4	11	15	41	475	177	291	258	1	16	84	42	7	4	537	1118	110	64	43	33	8	1	4	20	209	75	3	1	13	22	47	106	120	0	12	368	18	45	3	3	5	423	101	3	395	165	180
0	3	54	3	7	23	40	518	184	293	289	3	18	81	37	7	2	575	1188	111	49	66	35	5	0	2	19	275	81	2	4	7	30	41	105	140	2	8	388	11	46	4	2	3	432	106	2	438	187	187
0	2	53	2	9	18	31	529	184	298	219	3	29	96	34	12	2	547	1097	134	43	65	40	9	1	3	25	254	72	1	0	3	18	42	133	125	0	6	368	17	48	2	2	5	427	105	3	486	146	194
2	0	59	2	7	19	26	558	177	311	258	1	15	84	38	9	1	607	1166	122	47	53	39	8	1	5	20	249	109	2	2	5	21	54	117	130	2	11	378	19	47	5	2	8	444	112	6	447	180	187
2	2	62	3	8	26	32	485	220	276	278	4	19	92	37	4	4	590	1124	124	48	70	36	11	2	2	27	259	95	1	0	7	18	48	124	128	2	8	400	15	45	7	1	5	375	116	5	441	202	188
2	4	55	5	9	34	37	535	187	239	261	1	28	83	42	10	3	620	1132	130	64	62	25	6	2	3	24	289	98	2	1	6	32	51	124	143	4	6	393	26	56	2	5	3	433	124	2	476	199	209
1	3	62	5	3	19	41	633	198	247	245	1	31	97	35	10	3	606	1179	130	78	60	35	4	2	3	18	279	99	1	2	6	16	49	149	149	0	7	374	17	54	10	2	3	443	132	7	528	202	194
1	6	52	5	10	26	40	546	187	315	251	1	25	78	30	9	2	526	1155	128	57	52	35	10	3	6	30	309	96	0	3	5	25	40	133	118	8	12	374	11	56	10	2	7	408	115	1	457	176	178
0	1	72	1	8	20	46	568	166	281	261	0	24	88	31	9	2	595	1144	158	46	52	44	11	3	5	27	263	76	1	0	1	24	49	127	124	7	11	369	29	47	3	3	2	425	110	1	477	194	185
1	0	60	7	4	21	47	552	167	288	241	1	16	76	49	3	1	573	1143	128	59	50	30	6	1	2	21	214	83	2	3	5	29	52	130	125	1	5	339	23	31	2	1	4	450	124	5	444	179	185
0	0	54	4	8	22	43	516	176	255	237	1	14	86	45	6	3	557	1077	114	51	49	35	10	2	4	20	243	73	0	1	3	19	46	101	128	3	7	370	13	31	4	6	3	497	102	3	413	161	169
2	2	53	7	10	20	42	514	156	307	236	1	21	82	34	8	2	574	1227	128	51	64	33	8	0	5	15	277	87	0	1	7	32	47	120	104	5	10	358	19	42	7	0	6	448	112	7	409	158	171
0	3	45	1	1	19	41	492	170	276	237	0	10	74	36	12	1	554	1135	116	55	53	26	8	1	2	15	213	62	0	1	2	22	60	115	107	1	7	376	19	25	8	4	7	438	113	5	386	156	167
1	1	56	0	6	18	47	547	194	311	278	1	25	77	35	9	4	513	1129	120	54	71	41	3	0	1	27	268	102	2	2	3	26	47	122	113	4	11	358	10	38	6	2	5	441	131	4	463	162	182
0	0	49	4	11	16	48	196	61	293	234	0	18	79	43	8	2	567	1058	46	19	56	38	10	1	7	22	231	71	1	1	5	25	52	50	43	0	11	403	9	34	4	5	4	437	114	4	142	77	164
1	3	46	4	9	28	47	644	194	269	273	4	32	92	37	7	4	548	1027	166	73	58	45	10	0	4	22	275	103	0	3	5	20	55	150	116	5	6	371	20	46	7	2	7	392	101	4	514	204	191
0	1	44	1	10	16	45	456	178	309	256	2	18	87	35	6	2	597	1178	107	56	62	62	11	1	1	22	277	71	3	0	6	30	58	116	95	1	7	370	16	40	2	2	8	372	103	6	382	167	180
0	3	57	5	4	26	34	490	190	304	249	0	14	101	17	6	0	374	1083	116	49	66	49	6	2	3	21	240	69	0	0	2	30	39	107	110	3	10	371	9	29	7	1	5	280	85	4	399	179	162
3	2	45	2	1	22	29	543	206	263	222	1	18	88	30	5	1	666	1170	143	65	46	38	6	3	2	24	204	78	2	0	1	21	43	134	138	1	8	370	20	26	6	0	4	496	150	4	457	179	164
0	1	46	3	6	25	50	480	156	285	257	1	25	77	35	11	3	626	1192	111	48	48	32	6	1	6	27	304	87	1	3	4	27	42	108	107	2	16	389	18	46	4	2	8	436	121	2	378	165	173
1	1	34	2	10	18	43	558	167	310	236	3	16	68	40	7	2	621	1115	133	60	72	29	8	1	3	28	219	73	4	1	8	29	46	133	133	1	11	373	15	28	3	5	6	500	134	1	489	195	144
1	2	56	1	4	13	34	503	171	311	252	3	14	95	40	7	3	544	1114	135	55	59	28	4	2	4	22	238	68	2	1	7	18	47	112	127	5	11	386	18	31	5	3	7	445	147	2	428	181	162
1	4	48	2	6	22	37	532	170	271	230	2	19	87	39	4	2	531	1174	129	57	64	29	13	0	2	20	259	73	0	1	4	12	42	106	118	2	12	368	16	28	1	4	5	429	121	4	422	195	162
1	1	57	6	7	20	46	492	171	290	236	3	13	81	37	13	1	523	1198	106	51	48	32	11	1	5	23	251	71	0	2	8	22	49	126	103	1	13	388	16	33	6	1	6	452	125	3	378	145	160
1	4	39	3	7	16	58	419	127	309	225	1	17	85	23	11	5	525	1129	117	33	54	37	7	2	1	11	241	82	4	1	2	20	55	97	95	5	12	404	8	32	6	1	6	461	131	3	370	129	168
1	3	46	5	8	14	42	447	175	247	230	2	13	94	37	9	1	477	1185	116	54	60	40	8	1	2	24	284	68	2	1	0	28	48	116	103	3	9	372	12	35	1	6	8	402	119	1	386	144	172
1	1	49	1	7	17	38	475	182	267	218	3	13	89	41	10	2	435	1178	128	45	48	28	7	2	6	26	225	48	2	2	3	27	57	128	103	0	11	384	9	29	5	1	3	422	94	5	385	184	154
1	2	43	3	3	20	34	453	176	267	231	5	17	95	31	8	3	449	1171	104	46	57	43	9	1	5	19	277	74	1	3	7	22	43	101	101	2	7	370	15	47	8	4	4	421	112	8	360	152	176
1	1	42	3	5	19	37	502	175	265	236	1	22	84	41	9	1	303	1174	127	60	49	28	5	1	5	13	264	78	2	2	0	16	51	106	125	1	7	392	21	25	9	0	5	296	95	3	411	174	170
3	2	51	6	4	11	36	510	171	249	207	2	10	104	26	11	2	459	1188	129	52	55	36	4	0	3	20	169	30	2	3	4	32	35	129	117	1	8	378	10	22	0	6	3	414	124	4	411	148	150
1	2	39	4	7	23	33	498	168	255	247	1	22	100	29	9	0	503	1170	114	53	58	41	7	1	1	13	271	87	1	1	6	30	45	121	106	3	14	375	24	37	2	5	7	444	110	7	400	166	154
0	2	43	0	4	12	44	585	206	274	246	2	19	78	30	14	4	476	1216	153	54	51	34	1	2	1	23	231	41	5	1	2	20	54	136	139	0	13	350	16	31	2	1	9	422	119	4	513	200	161
1	1	40	4	5	12	46	509	185	262	260	2	16	99	22	13	5	492	1207	151	65	67	39	10	0	1	18	247	72	1	2	4	27	40	125	109	0	8	352	15	32	4	5	7	408	119	4	452	168	154
0	1	38	5	4	14	43	491	183	249	246	3	19	99	19	12	4	496	1244	132	65	58	38	6	3	3	20	217	43	1	3	4	20	52	132	108	0	12	336	18	21	5	0	6	444	108	2	444	177	145
0	3	31	4	10	13	50	463	141	251	234	0	24	79	23	10	3	516	1178	144	36	62	29	8	1	4	24	279	76	2	0	8	19	49	122	119	2	9	387	17	24	6	2	4	420	110	3	418	181	157
1	2	46	4	5	14	40	563	213	282	230	1	17	89	18	9	1	562	1257	142	69	45	42	6	1	4	16	238	67	1	1	3	20	47	145	119	4	9	367	12	24	3	2	4	444	124	6	479	183	144
1	2	51	2	4	12	31	610	192	310	268	4	13	98	18	11	0	512	1249	162	56	61	43	7	0	4	17	169	42	1	2	4	33	55	163	125	1	4	379	22	18	4	1	4	430	115	6	531	223	134
1	3	39	4	8	10	45	562	178	322	237	1	13	105	17	11	4	505	1225	170	67	63	34	5	4	4	23	247	67	1	6	3	28	56	139	137	1	11	389	16	30	2	3	5	466	108	2	542	212	139
1	4	40	2	6	7	39	585	245	291	254	3	19	79	29	7	1	459	1295	184	71	54	31	10	2	3	25	223	65	0	3	2	30	59	165	152	2	8	370	9	23	5	1	6	459	115	6	567	227	136
0	3	40	2	5	16	47	602	229	291	262	1	21	102	25	6	3	559	1162	159	81	54	40	4	2	5	22	292	81	2	1	8	21	51	171	144	3	8	364	16	35	2	3	5	435	120	2	585	213	135
1	1	38	2	6	20	41	613	209	246	222	4	22	89	23	9	1	445	1216	197	78	54	28	5	3	4	18	249	72	3	2	1	19	49	156	155	1	7	334	15	29	4	2	7	395	111	5	568	224	146
4	1	46	3	5	12	28	639	227	265	243	2	13	102	18	15	3	452	1249	192	97	49	34	8	5	2	22	231	59	0	1	4	29	47	180	161	1	13	367	14	29	5	2	2	387	108	7	606	229	136
2	2	52	4	9	15	39	641	222	283	246	0	21	89	23	9	0	449	1170	222	77	55	31	5	1	4	13	230	69	1	2	7	19	52	189	165	3	10	394	18	25	4	3	9	451	109	6	652	246	144
1	3	36	2	9	15	40	660	235	280	233	3	27	96	24	11	3	378	1189	190	94	52	34	13	1	2	21	262	90	0	7	2	25	65	177	171	2	8	389	11	38	3	1	2	434	98	6	676	222	136
1	1	44	3	7	7	26	711	267	286	221	0	17	96	15	14	0	480	1126	196	96	68	22	3	2	3	21	182	47	0	1	3	22	50	186	156	3	13	389	20	18	3	2	4	414	134	1	655	250	122
0	2	32	1	9	11	35	710	255	260	241	5	13	92	18	8	0	346	1115	197	105	58	33	9	1	2	16	157	42	2	1	4	19	47	194	200	3	9	391	17	20	5	2	7	378	86	9	675	246	131
1	6	39	3	7	10	43	750	230	292	255	0	13	97	15	7	3	530	1145	211	87	57	34	6	0	6	17	242	61	0	4	4	21	45	207	187	6	11	368	20	26	3	2	7	527	122	6	740	265	126
0	0	47	8	7	12	37	769	272	286	242	2	13	91	24	8	1	438	1038	237	104	49	39	8	0	4	25	205	56	1	2	5	22	44	211	182	3	14	385	17	20	3	2	8	433	114	2	721	289	136
3	5	41	1	6	17	41	741	279	289	218	2	17	79	17	12	3	443	1155	206	102	60	31	13	0	4	23	299	72	1	4	1	24	40	212	187	1	6	411	21	35	4	2	8	416	102	6	756	294	125
3	4	43	3	8	9	48	726	283	277	234	1	18	91	23	9	1	430	1107	233	91	57	33	9	0	3	31	271	58	2	3	3	24	44	196	202	1	9	390	12	31	3	1	9	442	98	5	791	261	125
3	0	44	3	5	11	42	758	245	260	250	1	12	94	20	11	5	455	1081	206	105	47	35	9	1	1	20	209	59	3	4	8	18	44	194	189	2	9	380	15	22	3	4	5	437	101	1	709	285	119
0	0	39	3	5	23	38	786	267	285	212	2	15	93	14	10	3	460	955	214	103	36	27	10	2	4	26	281	77	2	4	1	22	48	216	194	4	13	382	19	28	2	0	5	423	114	4	761	273	117
0	2	40	4	10	14	48	785	288	256	217	0	13	66	20	20	1	481	1014	230	121	55	27	4	1	4	31	277	63	2	5	7	22	43	223	209	3	10	385	16	28	2	2	5	478	116	1	792	297	140
0	3	43	1	5	11	35	830	257	264	236	1	8	78	17	6	1	502	966	229	100	47	31	13	2	1	22	130	37	2	1	6	22	52	226	203	5	11	395	16	20	1	3	14	464	106	5	770	293	140
2	3	48	4	9	14	31	808	261	280	215	1	11	69	15	10	2	477	962	223	109	48	21	6	0	0	21	251	77	0	4	0	12	36	212	223	1	7	390	16	29	2	1	3	473	97	6	777	310	110
2	5	47	7	10	22	45	860	280	259	225	0	19	79	20	12	4	476	882	221	110	54	29	8	1	2	17	292	94	2	2	5	26	51	221	209	0	5	367	16	38	0	1	4	442	93	5	864	335	133
1	2	39	4	2	14	38	849	277	271	218	1	17	75	14	9	0	375	931	232	120	46	32	4	2	4	22	289	77	0	1	6	11	48	237	222	1	13	404	17	36	1	2	6	353	95	3	844	350	139
1	0	46	1	7	5	38	835	285	288	250	0	20	61	24	10	2	505	708	219	102	45	38	3	0	5	15	218	56	0	1	9	19	29	237	210	3	7	382	17	22	3	2	12	459	106	2	836	344	135
0	1	44	6	7	7	35	885	270	256	239	1	13	68	16	12	3	459	746	242	112	49	31	7	1	2	19	182	49	1	2	5	22	22	248	228	2	9	383	15	20	2	0	9	452	101	2	886	334	130
3	5	47	7	3	17	42	855	311	273	232	1	15	67	26	5	4	465	929	238	107	50	31	7	2	7	17	195	63	3	1	2	24	29	260	224	2	6	361	18	23	2	0	4	414	109	1	894	297	139
0	1	46	4	6	15	50	873	298	260	201	2	19	78	22	8	6	331	761	247	103	51	29	3	1	5	22	245	82	0	3	2	12	29	227	219	0	10	370	14	33	3	0	9	401	79	5	845	308	128
3	2	49	6	6	9	39	916	280	273	220	3	11	71	12	11	3	436	667	248	105	53	28	9	2	2	20	145	34	1	3	4	18	21	258	224	1	6	365	15	16	2	2	6	459	109	4	867	335	125
3	0	53	4	8	16	38	980	312	226	205	1	17	66	16	7	2	451	767	274	111	54	17	8	3	4	20	241	65	0	5	5	14	35	286	218	5	8	388	11	39	1	1	5	474	87	3	969	387	111
1	6	30	2	7	7	42	940	312	307	250	3	10	68	27	11	0	458	657	267	110	49	30	5	1	1	23	135	39	2	2	3	14	24	278	258	2	9	383	17	17	1	2	8	466	117	3	991	370	123
0	2	48	2	7	12	55	1003	292	266	247	3	12	70	12	14	4	480	686	272	109	57	25	3	0	4	12	247	58	1	5	9	17	32	285	256	0	10	381	17	24	8	4	10	486	103	3	989	388	116
4	5	40	3	8	16	38	1030	345	289	260	1	9	68	13	10	3	429	782	272	123	54	32	5	0	8	10	213	72	0	3	4	21	35	288	234	0	10	357	17	27	3	3	8	457	98	4	1027	403	139
3	4	48	7	6	11	35	994	338	292	275	3	12	74	11	15	2	452	921	258	120	61	33	9	0	3	20	167	43	1	3	6	22	33	283	238	3	6	357	8	20	2	2	9	442	109	5	991	395	127
0	0	40	3	8	12	30	1066	342	308	244	1	20	78	22	10	2	364	786	273	125	58	26	6	3	4	11	221	60	0	4	2	25	27	305	232	4	11	372	10	26	4	2	10	411	101	7	1058	387	112
0	2	48	4	8	16	39	1102	348	279	281	1	19	75	17	10	1	248	733	277	122	52	30	8	4	4	16	247	93	3	0	1	11	26	313	252	3	5	400	9	27	2	0	9	236	53	2	1146	373	132
2	4	50	6	11	14	44	1118	347	278	265	0	10	80	15	9	3	517	729	298	129	46	23	6	1	5	10	169	53	2	0	5	14	21	332	249	0	10	386	12	18	1	6	7	530	105	2	1130	444	119
1	1	56	6	7	16	35	1107	351	279	270	0	12	54	19	15	3	511	645	275	142	48	30	6	0	1	7	281	75	4	3	5	16	23	276	269	2	11	364	9	26	3	1	8	509	103	0	1105	437	131
0	3	40	3	6	11	32	1071	359	333	273	1	11	74	12	7	3	466	860	290	135	65	24	5	1	5	9	256	54	3	3	2	17	26	296	268	3	8	373	8	23	2	2	3	495	115	1	1116	429	136
0	1	44	6	5	10	31	1053	334	295	229	1	17	58	10	15	5	280	732	274	97	54	39	6	0	3	13	176	72	1	3	1	17	22	288	249	1	8	390	8	18	2	6	9	290	57	1	1084	400	118
2	1	36	5	6	16	33	1135	349	284	282	1	14	69	24	11	2	506	699	292	139	61	28	7	0	0	9	199	65	3	5	8	9	32	328	274	4	8	404	13	23	5	2	6	589	120	2	1145	400	124
2	1	40	2	5	8	37	1015	330	301	296	3	10	53	15	7	0	509	703	266	108	43	32	4	2	0	6	244	62	1	6	7	12	25	318	214	1	9	387	14	23	3	1	7	574	104	0	1008	405	139
1	1	40	4	3	18	38	1099	390	317	274	0	21	63	18	8	1	481	631	288	132	64	36	3	2	4	9	257	64	0	2	7	12	26	318	274	1	5	348	22	34	3	2	9	545	98	2	1115	485	129
1	1	24	3	6	15	28	1045	377	342	264	2	16	61	20	11	2	449	884	271	123	55	33	2	2	1	14	245	81	2	3	4	16	32	320	241	3	7	355	20	32	2	2	5	523	112	7	1138	440	134
1	2	26	5	5	11	35	1123	338	310	271	1	13	65	19	7	7	469	817	266	135	41	38	7	1	2	12	206	62	0	0	4	18	34	318	279	3	11	353	22	23	9	3	2	563	93	4	1171	459	131
3	2	42	4	5	15	32	1117	331	337	281	1	15	52	18	9	2	481	733	308	126	49	30	4	0	4	9	218	57	2	4	2	18	32	326	281	3	4	357	13	30	6	4	6	480	104	5	1189	429	129
3	1	43	3	3	7	29	1233	390	349	319	1	13	48	11	6	2	436	725	297	150	61	24	7	0	1	8	203	69	0	3	2	15	17	372	278	3	10	346	14	18	1	2	2	552	102	4	1354	472	120
6	1	50	2	6	16	30	1116	392	326	292	0	16	53	14	9	2	460	651	289	133	58	33	6	0	3	4	251	67	2	4	5	10	24	331	259	4	9	344	9	31	3	2	9	563	100	4	1193	445	136
2	2	35	3	8	13	44	1152	433	335	271	1	18	52	16	8	2	456	902	338	127	59	33	7	1	2	6	261	61	1	3	3	21	31	379	266	3	12	347	13	28	2	2	6	551	96	3	1239	474	124
1	0	43	6	6	10	27	1133	391	336	278	2	3	62	17	10	4	467	833	312	141	61	31	5	0	2	2	169	55	2	2	5	13	24	369	286	4	7	347	20	27	0	1	9	579	95	6	1284	465	115
4	0	57	1	6	14	35	1156	393	380	249	2	6	57	16	17	4	89	784	340	140	59	36	6	2	0	7	223	63	1	1	1	10	35	379	245	2	4	347	15	23	2	4	6	132	21	3	1280	476	125
0	3	59	5	13	26	30	1212	391	352	250	2	20	61	10	7	3	528	709	335	129	42	35	8	1	5	6	255	78	3	5	7	11	28	375	252	3	7	319	12	23	6	2	9	728	117	2	1279	510	98
2	1	37	4	5	12	35	1205	367	350	249	0	19	46	16	10	5	464	721	340	120	38	28	4	0	1	8	220	68	1	1	3	11	33	363	292	0	5	335	16	22	5	2	10	618	122	6	1311	505	139
1	1	47	6	8	10	39	1169	413	348	260	0	8	55	15	13	0	327	830	328	131	63	22	4	0	2	1	216	64	2	1	4	14	29	365	265	5	8	337	14	24	3	5	2	383	72	5	1305	449	109
0	1	45	5	6	16	34	1117	394	337	253	1	20	47	27	6	3	457	776	339	116	54	39	11	0	4	4	240	81	0	5	5	18	35	337	300	1	11	341	13	29	6	3	3	547	127	4	1285	453	123
1	3	43	3	5	12	32	1191	369	344	244	2	14	54	15	7	6	439	705	331	120	42	36	3	0	6	7	263	47	2	3	6	13	23	400	264	3	4	339	13	27	0	0	3	593	99	6	1351	437	123
0	1	38	4	8	13	40	1139	382	314	256	1	13	49	14	14	4	451	754	327	105	49	38	3	4	2	5	203	73	2	2	7	16	29	359	272	2	2	323	12	24	6	2	4	565	101	3	1285	450	109
1	3	40	2	6	8	44	1128	376	310	284	1	9	45	19	10	5	462	732	313	137	41	28	3	3	2	6	155	44	0	1	3	12	37	343	246	1	11	347	18	15	2	1	4	545	126	2	1234	451	118
2	2	38	4	6	21	40	1168	385	320	242	0	9	39	26	17	2	476	934	344	130	48	28	7	1	3	3	217	67	2	3	9	11	37	357	274	3	7	288	11	28	4	3	5	591	123	5	1370	484	123
1	4	43	5	3	18	38	1154	391	313	246	1	14	57	16	13	5	475	779	343	120	48	27	4	0	2	11	193	49	0	4	7	10	27	362	272	1	8	345	4	23	1	4	3	579	99	3	1357	454	99
1	0	48	0	11	15	30	1198	404	322	256	0	15	35	25	12	3	458	699	373	104	58	36	10	3	2	7	246	69	0	1	4	15	30	413	267	4	7	325	10	33	3	0	3	528	119	0	1401	499	114
1	3	60	3	5	11	28	1177	351	340	248	1	7	37	19	19	4	460	777	324	134	48	30	3	0	3	8	186	60	1	3	4	15	35	372	280	0	10	303	12	19	1	1	7	613	104	2	1336	493	123
2	3	43	3	4	11	27	1258	401	335	249	0	9	44	18	5	1	458	718	346	128	43	32	3	1	3	15	187	53	1	0	6	12	34	385	310	1	6	328	14	18	4	1	5	597	93	10	1391	457	127
1	1	36	4	8	18	26	1083	385	296	269	2	12	35	16	10	2	469	866	295	112	49	36	4	2	1	11	233	56	2	4	6	12	49	327	266	3	6	324	12	28	5	2	6	578	125	1	1245	410	129
0	2	51	2	4	17	26	1120	366	295	255	0	20	28	13	9	6	408	979	332	97	54	45	10	1	1	8	221	72	0	5	8	17	35	348	246	2	6	316	15	33	2	1	1	584	108	6	1281	446	111
1	0	60	6	9	11	18	1171	395	311	249	0	10	35	15	13	5	350	755	309	123	55	34	5	1	5	6	221	47	1	0	3	11	35	360	241	5	8	305	9	29	0	1	5	460	86	2	1346	400	124
0	2	34	3	8	13	22	1128	382	309	265	1	16	49	13	9	3	197	818	296	103	47	28	3	1	0	7	244	58	2	1	3	9	33	354	229	1	8	309	12	35	3	1	4	267	46	8	1269	442	133
0	1	48	5	6	6	31	1089	382	353	243	1	21	44	16	13	6	458	800	302	114	50	34	9	4	2	6	181	53	2	2	5	9	38	320	249	2	10	290	27	22	4	0	0	622	115	3	1215	382	125
0	3	39	3	4	18	25	1104	410	319	235	1	14	48	16	6	4	450	751	301	109	61	32	5	2	6	6	208	71	0	3	4	7	37	338	261	2	11	320	14	28	3	0	0	591	106	4	1240	405	101
4	2	53	3	4	12	25	1066	376	332	268	0	11	29	13	13	4	420	969	267	112	44	32	7	0	2	7	182	40	2	3	4	12	37	306	257	4	5	342	13	20	2	2	3	498	99	6	1136	399	119
1	1	67	2	4	18	22	1081	338	328	238	2	19	41	17	13	1	471	842	294	105	61	31	6	3	3	4	286	73	2	2	6	6	35	322	258	1	7	322	18	22	8	2	2	603	101	3	1178	395	119
1	1	44	3	5	18	27	1055	342	314	239	1	20	38	13	13	5	465	916	264	123	54	28	7	1	4	6	251	75	1	3	5	8	25	308	261	1	12	319	10	26	2	1	1	619	99	3	1182	349	95
1	1	44	4	5	13	22	1065	360	322	261	0	17	45	12	15	5	459	828	268	104	58	27	5	1	2	3	208	57	0	0	6	14	26	309	256	1	4	321	7	29	3	1	1	587	111	2	1153	373	106
1	2	47	1	10	10	29	1041	362	338	251	2	14	35	18	17	6	448	932	260	109	52	36	3	1	4	9	233	50	1	4	8	5	30	311	276	1	10	306	16	30	3	4	0	640	117	7	1185	390	122
0	2	61	3	8	8	32	852	269	350	250	2	12	52	15	14	1	443	974	193	91	57	30	11	0	0	2	198	56	0	5	1	5	32	261	177	1	7	302	18	22	2	1	0	589	96	4	858	271	125
0	1	51	3	9	15	28	1068	338	324	243	2	18	34	14	10	2	410	861	273	134	48	37	7	3	7	5	256	75	0	2	3	6	26	317	262	2	10	306	15	34	3	1	1	591	121	6	1127	356	109
2	4	52	1	11	23	23	1088	375	364	246	1	22	33	13	16	5	432	843	263	132	47	37	3	1	0	2	320	94	1	2	8	19	25	317	254	1	4	314	11	45	4	1	1	565	102	3	1150	418	105
1	2	51	3	7	8	26	1066	357	323	246	2	19	32	9	21	2	436	867	243	147	59	26	11	4	5	9	223	48	0	3	6	8	31	294	249	5	9	309	14	27	1	2	2	578	103	9	1112	381	108
3	2	51	0	15	22	29	1084	374	334	249	0	20	39	14	10	4	386	841	270	121	48	40	6	0	2	2	314	104	0	2	1	11	33	328	244	1	11	291	20	33	3	0	1	526	92	5	1126	356	97
1	1	43	4	12	16	32	642	220	355	243	2	21	32	13	11	5	481	901	156	68	43	28	5	0	0	5	315	92	0	3	4	15	26	172	137	5	7	302	12	54	6	0	1	539	126	8	679	205	100
3	2	42	1	9	13	18	919	377	312	257	1	23	33	4	14	0	413	812	238	121	54	30	3	2	1	5	293	85	0	1	2	8	26	299	212	4	9	302	6	44	6	0	0	543	110	3	1010	323	110
2	2	51	4	14	11	31	1022	339	328	240	1	16	41	11	8	4	445	876	254	102	48	32	10	1	2	3	272	75	2	3	7	13	25	295	231	1	5	305	14	34	3	0	1	563	96	10	1012	347	107
0	4	36	2	3	21	28	1066	435	315	208	0	15	34	10	8	6	428	1022	265	113	45	28	10	1	2	4	243	74	1	2	4	11	28	342	259	2	8	299	12	42	2	1	0	583	110	5	1117	375	118
2	0	62	1	6	22	24	923	332	326	216	0	29	33	11	12	1	407	921	216	100	53	30	2	2	2	6	296	97	0	6	8	15	24	251	232	1	5	308	10	34	6	1	0	552	107	3	981	293	139
1	2	62	4	13	22	33	917	319	319	253	3	28	32	12	5	5	406	915	211	118	52	20	5	0	1	5	257	85	0	1	4	9	30	249	226	2	7	325	16	35	7	0	1	599	93	4	942	311	116
0	1	50	1	8	13	37	1031	369	345	264	1	17	23	10	7	3	439	889	226	128	50	21	3	0	0	1	272	83	1	1	3	15	24	279	248	6	9	324	23	37	2	0	1	590	109	3	992	403	116
1	3	47	3	9	26	22	409	132	335	267	2	27	30	19	9	0	416	794	89	55	48	28	3	0	2	9	316	81	0	0	4	11	22	120	81	2	7	305	9	50	6	0	0	581	121	2	390	148	124
1	3	46	4	14	15	30	534	221	320	267	1	20	31	12	3	3	430	897	116	61	48	26	7	3	3	2	287	74	1	5	1	8	24	157	120	2	11	309	5	51	1	0	0	573	100	2	533	158	119
0	2	34	2	9	19	27	523	181	316	243	0	28	28	9	7	1	350	893	116	62	41	16	6	1	0	3	269	60	0	5	3	12	26	143	107	1	5	285	17	41	3	1	1	602	107	4	499	159	101
1	2	52	2	8	19	22	978	313	313	241	2	23	26	7	7	2	400	950	230	113	46	19	7	3	0	8	240	69	0	3	5	9	18	279	201	1	6	311	8	38	2	0	1	604	122	5	955	316	116
1	3	38	1	9	27	28	284	127	313	256	0	26	30	11	2	2	428	956	57	35	41	32	3	1	2	4	307	97	1	3	2	10	25	87	69	4	8	296	7	52	4	0	1	589	112	2	295	98	102
0	4	62	1	6	17	29	746	238	294	252	1	18	35	11	12	3	450	966	184	84	46	22	5	2	0	3	200	72	1	1	5	10	31	223	160	1	15	280	10	33	3	0	0	618	117	0	733	204	95
1	4	41	4	5	28	30	500	182	299	243	2	27	23	11	8	3	457	948	113	69	39	27	6	2	4	3	295	99	1	3	3	5	27	141	104	3	4	285	7	55	5	0	2	619	117	2	511	166	101
0	4	45	2	7	20	20	496	188	299	221	1	20	28	11	17	2	420	883	123	66	46	24	3	0	1	3	219	73	0	4	3	12	20	136	116	6	11	290	6	33	7	0	3	582	116	0	483	160	85
2	4	43	2	16	29	20	754	306	302	254	1	24	36	8	7	6	450	997	183	96	42	17	5	3	1	1	312	100	1	2	5	6	16	229	158	2	5	303	6	52	5	0	1	557	90	4	755	282	106
1	2	38	1	8	15	15	298	115	283	238	1	30	27	9	9	1	447	1071	75	38	39	17	8	1	0	5	223	67	0	4	3	5	21	84	58	4	12	249	9	44	1	0	0	528	107	3	281	96	94
2	5	52	3	5	26	24	705	253	270	239	2	24	31	15	16	5	481	925	171	89	46	15	3	1	1	1	243	94	0	3	3	8	22	207	157	2	6	280	7	45	2	0	0	561	122	3	727	210	102
0	5	48	2	5	33	19	617	223	271	237	1	32	23	16	5	4	429	885	145	66	40	22	6	0	3	1	254	81	1	5	5	9	24	179	121	1	5	285	8	47	1	1	2	554	120	4	616	199	107
0	1	42	4	11	18	25	587	210	279	213	1	23	30	14	13	0	466	924	137	74	41	11	6	2	0	2	266	77	0	2	3	9	15	152	116	3	13	273	4	42	6	0	2	637	121	2	570	144	117
1	5	44	1	7	21	12	663	260	265	242	1	31	27	8	8	1	440	914	158	84	37	19	6	2	2	3	221	89	1	4	5	11	35	203	143	1	7	259	12	51	4	0	0	572	116	3	659	194	97
0	2	47	4	10	30	25	861	316	254	216	1	30	31	9	8	2	475	923	205	117	48	10	6	1	0	4	291	100	0	2	4	12	19	242	197	3	7	278	6	47	4	0	0	623	98	4	860	257	96
[truncated: 124 more columns]

## Sheet: KO PTX rep 2
F4111	F4112	F4211	F4212	F4311	F4312	F4411	F4412	F4121	F4122	F4221	F4222	F4321	F4322	F4131	F4132	F4331	F4332	F4431	F4432	F4141	F4142	F4241	F4242	F4341	F4342
436	651	454	454	31	22	22	95	8	34	146	180	619	133	213	29	356	268	81	98	110	272	46	48	120	107
437	578	420	447	28	24	32	100	5	24	143	173	590	124	201	27	338	259	54	92	107	248	56	31	125	94
416	620	465	427	25	30	31	95	7	26	135	181	613	122	199	23	382	238	48	101	115	278	52	46	134	96
457	631	458	449	25	18	32	106	5	31	140	172	628	120	179	29	388	265	65	98	99	275	40	48	145	117
438	628	421	434	30	21	41	103	5	30	144	174	622	103	161	38	353	256	52	98	106	274	58	39	132	110
382	575	347	418	26	21	34	94	2	24	128	152	539	114	151	35	350	211	47	86	96	217	49	41	114	108
399	569	381	410	34	21	34	105	12	17	121	155	576	149	146	21	336	267	52	90	96	213	48	38	136	113
414	590	408	409	28	12	35	115	4	27	137	149	579	133	185	34	368	216	59	86	119	237	56	39	117	125
408	604	440	396	27	20	45	103	4	26	146	162	595	153	184	36	350	255	63	81	105	256	56	51	118	115
400	561	386	388	29	24	31	99	6	25	137	148	537	159	176	33	306	240	57	64	120	245	43	33	138	96
465	526	404	423	26	18	31	110	4	33	145	145	599	170	190	38	323	288	42	65	112	267	45	38	140	97
470	554	448	421	27	18	28	131	4	34	155	154	569	165	203	41	368	232	56	72	109	269	47	47	137	86
455	651	487	478	36	19	35	120	7	29	158	208	631	111	202	34	406	257	66	86	122	301	48	52	162	100
413	536	401	403	29	15	34	107	4	12	135	146	530	137	193	32	365	204	50	61	124	244	46	47	124	101
430	573	439	367	28	16	37	113	4	22	132	152	551	162	182	34	332	234	47	65	100	264	54	37	129	111
416	582	385	395	32	20	34	120	7	17	130	147	541	198	163	29	331	210	52	74	90	256	46	33	116	113
445	593	410	409	31	15	35	117	3	24	145	138	519	212	154	35	342	228	50	68	97	248	47	37	152	95
457	624	433	433	36	18	45	116	6	19	147	171	570	223	183	36	348	230	67	79	102	283	48	44	126	121
431	617	442	446	27	21	40	132	4	22	148	159	581	197	184	40	386	228	73	87	108	277	58	47	132	105
430	578	401	414	31	16	32	134	5	30	139	146	589	232	189	39	358	237	66	80	104	255	52	32	139	108
389	540	337	358	30	14	55	108	5	24	113	144	497	206	183	32	301	217	49	62	80	213	41	17	113	98
466	617	392	444	41	10	42	154	9	22	147	156	605	245	178	24	363	249	58	80	112	253	52	27	158	101
427	621	446	415	36	22	54	158	2	35	145	148	598	218	193	33	332	235	50	80	92	275	39	31	141	97
455	621	435	448	29	25	35	141	6	21	155	167	567	254	177	33	375	244	65	63	116	276	37	30	135	135
398	523	346	375	30	22	45	116	3	19	134	130	519	192	176	26	305	237	48	58	106	239	41	28	124	105
383	591	390	371	32	20	39	129	1	24	119	160	490	227	167	31	307	253	52	65	102	227	41	32	126	110
475	699	452	428	34	20	39	149	3	22	179	158	579	221	182	30	367	246	74	69	119	279	41	42	141	118
538	618	455	489	33	24	50	127	5	27	184	172	605	222	176	40	365	274	68	93	127	281	50	29	157	121
535	652	504	509	32	10	36	135	7	23	213	164	656	229	177	38	388	285	64	76	105	307	54	51	189	133
453	646	430	444	30	15	38	108	4	36	177	166	584	225	165	30	365	251	59	74	113	271	55	40	165	119
474	646	470	457	33	27	33	137	7	22	183	157	631	245	158	33	400	249	61	79	137	289	59	48	126	142
517	690	501	466	32	21	41	140	7	30	208	196	653	216	157	32	407	274	60	77	109	307	52	52	162	134
467	603	422	428	23	29	34	122	3	20	177	158	587	205	157	31	338	271	44	55	119	290	45	32	151	130
486	610	422	442	31	21	30	113	6	17	180	147	574	214	183	37	367	241	58	58	124	273	55	38	140	133
558	668	508	493	34	25	57	128	5	14	187	188	673	208	165	65	392	261	62	75	134	299	43	44	154	128
302	386	282	292	22	12	24	72	2	5	105	119	367	101	97	22	224	119	26	37	68	197	30	23	82	67
371	481	326	344	24	24	38	76	0	17	149	130	445	115	116	23	238	179	31	47	92	204	33	36	96	84
754	1025	628	667	43	38	55	152	0	25	305	265	884	283	225	42	529	300	79	101	203	358	63	96	222	193
648	944	572	600	42	36	55	131	3	18	280	238	763	257	236	37	422	305	85	72	183	364	42	61	189	159
563	864	528	502	30	40	49	119	6	26	242	195	700	297	203	47	392	258	70	76	127	339	59	77	202	178
654	874	556	515	46	35	50	112	4	31	255	192	691	302	200	63	413	242	68	73	144	340	52	77	180	194
709	886	543	617	42	34	42	128	4	21	248	214	698	306	236	37	415	284	74	83	170	357	56	95	210	195
718	1003	603	629	49	24	42	141	3	32	240	248	732	247	239	51	421	268	68	78	173	373	83	98	186	215
803	1035	641	669	46	34	48	115	2	37	273	255	579	222	286	42	428	280	69	79	177	413	87	109	205	195
779	1032	626	619	54	30	41	130	5	20	280	260	429	142	260	49	442	274	73	99	211	365	67	103	214	189
727	1175	697	679	43	46	57	146	6	25	318	273	509	178	274	49	465	285	80	96	201	410	75	125	203	230
877	1166	759	757	54	36	55	170	7	14	322	314	562	211	263	51	508	303	88	110	228	425	102	137	269	211
845	1158	779	734	57	47	70	161	4	25	320	302	553	194	278	55	506	303	86	110	228	431	116	144	259	213
893	1301	776	770	59	36	53	175	4	27	326	331	547	247	303	51	547	360	101	116	231	474	83	127	269	211
965	1386	831	844	52	38	60	168	6	39	377	359	631	248	317	44	637	417	123	117	240	466	89	126	280	249
1030	1442	873	920	66	48	73	179	4	37	452	378	671	276	344	59	667	497	111	148	269	524	97	130	285	267
1021	1409	905	838	35	54	70	177	4	25	424	371	618	286	336	85	641	438	105	129	296	487	107	131	260	253
1023	1476	914	838	48	56	60	182	7	38	451	343	612	292	325	75	660	453	107	152	284	522	102	120	280	250
1067	1348	905	796	48	57	51	174	6	35	421	339	582	284	325	53	648	442	108	126	236	510	90	137	254	252
950	1265	799	779	40	59	72	165	7	37	394	294	539	299	322	46	602	391	122	124	255	437	72	77	262	222
1014	1258	819	753	47	63	61	167	11	32	373	315	511	296	318	49	582	402	103	147	280	459	81	94	246	237
1014	1307	824	766	45	60	47	181	5	28	348	321	526	282	323	48	622	417	126	116	293	482	71	113	261	237
1101	1354	834	834	43	58	67	194	7	28	355	367	575	321	318	68	630	441	132	109	316	479	96	131	278	267
1087	1363	844	813	51	61	62	193	5	31	382	357	572	287	338	76	657	430	117	138	305	499	92	128	275	247
1051	1388	828	805	50	71	67	190	12	33	378	363	591	250	318	79	622	480	133	131	316	474	71	118	262	270
1086	1243	850	776	45	64	55	182	8	39	346	351	546	254	326	82	652	459	119	134	296	511	87	109	267	271
1045	1301	791	806	43	61	66	164	6	33	371	325	551	256	298	119	611	420	129	119	300	456	82	127	280	251
1050	1385	819	798	51	48	49	179	5	30	343	351	582	248	306	91	641	426	128	137	288	466	83	144	296	263
983	1268	794	727	43	47	44	189	2	25	343	314	571	264	286	98	601	387	120	126	298	424	84	150	309	220
1071	1351	773	807	50	35	77	167	3	24	348	330	580	297	287	103	598	438	126	138	311	456	110	197	276	269
1032	1245	811	729	47	39	65	178	6	19	344	305	547	276	284	82	584	382	129	123	280	443	113	168	286	239
973	1249	803	784	42	48	39	186	5	28	362	320	567	302	289	77	631	400	132	137	296	465	111	176	309	232
1033	1343	836	807	51	27	45	183	3	34	361	323	611	329	295	76	655	411	131	136	306	457	112	187	324	231
1018	1320	879	831	39	36	60	174	1	28	343	327	611	325	292	82	716	432	143	134	301	475	95	182	329	253
932	1300	811	847	54	35	50	201	6	28	315	351	560	340	281	70	631	459	131	132	317	463	80	156	305	253
963	1257	838	806	35	42	55	166	4	39	314	323	601	292	278	76	647	463	154	127	285	446	100	155	318	235
991	1263	861	789	42	32	44	179	4	39	321	324	604	353	277	72	673	408	135	124	271	479	103	172	341	231
1009	1265	847	829	49	35	54	189	3	43	317	303	608	356	299	81	666	457	117	127	270	451	116	177	342	226
997	1293	835	796	53	25	57	179	2	28	285	347	590	368	279	82	668	438	122	130	292	470	78	157	308	232
1047	1378	865	818	45	32	66	194	6	27	304	352	654	394	279	93	707	424	112	134	270	482	84	163	320	263
1010	1340	901	852	37	38	61	192	4	23	342	297	659	411	305	95	747	472	148	144	292	500	87	157	323	274
1024	1269	864	806	48	28	48	174	2	20	317	333	691	387	282	91	786	464	133	147	301	482	81	133	316	238
965	1364	929	875	55	30	59	178	3	22	336	326	678	349	274	119	762	473	130	154	320	478	91	175	312	245
1029	1412	872	945	38	31	54	171	6	20	345	315	680	361	281	97	785	488	129	131	309	513	83	162	291	246
1053	1370	924	917	59	36	58	186	4	18	328	338	710	389	285	121	773	492	122	127	295	516	100	146	278	270
1040	1385	930	888	36	46	86	159	3	25	317	321	696	373	252	133	744	491	114	111	296	451	94	165	299	238
1068	1374	934	898	47	46	73	157	7	16	322	338	698	358	256	143	787	488	125	118	304	498	104	153	281	235
1038	1401	909	918	44	43	75	173	2	16	318	366	717	367	252	122	772	510	111	153	309	492	116	142	270	229
1101	1497	993	921	55	27	64	195	3	25	320	348	731	384	258	127	783	505	138	167	318	476	90	158	269	242
1066	1360	889	904	40	49	70	160	2	17	298	321	645	416	257	93	723	451	108	148	313	457	76	139	269	251
1103	1434	1014	909	40	43	63	203	6	19	286	339	692	442	262	95	752	502	147	163	318	480	76	159	269	250
1050	1423	959	888	37	47	65	197	2	24	308	310	659	443	261	78	730	479	122	169	319	483	69	190	298	208
1065	1438	979	933	40	50	77	169	1	22	284	326	663	431	269	79	746	490	136	175	295	464	67	173	318	225
1165	1498	1040	950	45	50	69	186	4	26	309	319	714	409	271	91	796	472	140	183	302	493	77	150	314	227
1088	1421	996	952	46	49	80	208	2	15	311	321	669	417	304	57	740	468	138	161	320	459	93	153	254	240
1094	1401	989	965	43	48	67	202	2	25	288	322	663	443	282	78	773	450	114	132	322	480	75	153	283	249
1112	1467	1064	938	44	41	75	208	2	23	294	330	688	447	289	77	757	513	120	150	316	455	81	139	292	233
1076	1383	999	888	39	48	65	184	3	25	292	315	666	441	252	91	726	482	92	111	300	456	79	136	299	233
1135	1439	1077	938	53	37	68	203	4	23	282	336	639	398	288	130	759	502	122	118	333	492	74	155	277	239
1171	1483	1062	982	54	49	80	198	4	24	308	315	720	412	310	107	758	545	120	149	350	445	95	144	276	257
1204	1420	1067	994	38	43	86	189	1	14	294	300	640	399	300	147	763	510	118	134	339	500	84	144	292	237
1100	1389	1055	930	35	43	59	206	5	21	257	305	659	356	288	138	716	559	103	136	326	505	92	162	255	221
1078	1383	1020	935	36	36	68	228	2	23	280	288	643	446	285	144	717	519	111	139	312	484	79	131	263	245
1116	1368	1030	942	35	44	74	213	0	17	254	293	651	427	296	108	698	490	127	164	310	470	75	163	278	226
1120	1362	1012	955	43	31	52	185	2	17	270	278	645	479	303	127	724	479	108	137	301	502	77	204	283	232
1091	1288	976	952	49	39	67	205	10	32	277	268	657	479	280	110	736	509	121	142	340	440	90	175	288	223
1073	1393	1027	989	33	45	58	198	6	34	277	263	652	456	292	123	745	533	123	159	319	467	82	196	262	238
1085	1431	1044	961	37	41	56	197	2	31	254	266	682	452	287	119	741	515	115	188	352	454	84	177	283	206
1129	1321	1000	958	28	44	59	224	5	33	263	272	596	493	306	132	763	491	145	194	326	429	67	164	258	231
1019	1340	950	982	34	29	54	201	8	34	273	240	607	458	276	145	724	502	160	179	306	480	67	173	260	241
1056	1341	955	968	28	30	57	178	2	40	227	275	612	429	275	110	747	444	117	164	311	448	88	218	269	238
1099	1307	971	953	42	31	58	172	2	26	267	259	629	434	285	107	736	498	121	154	309	448	67	168	245	219
1057	1325	976	936	31	32	48	189	6	26	255	247	630	457	280	99	729	472	130	157	315	445	58	164	290	241
1102	1358	1017	963	30	26	55	187	10	43	247	269	623	459	284	94	706	476	143	167	313	491	62	206	251	229
1073	1328	978	983	47	25	54	179	3	36	249	248	599	468	289	83	703	517	161	200	319	447	73	186	271	223
1150	1411	1064	981	38	32	66	182	3	43	261	268	601	445	300	72	717	494	150	179	356	460	75	141	242	212
1121	1414	1028	1012	43	38	62	181	6	33	264	250	588	462	324	73	742	496	175	182	329	485	62	181	261	232
1069	1516	1128	1025	31	37	66	195	4	29	260	263	600	427	328	69	699	479	164	197	341	499	59	138	260	188
1227	1358	1058	1061	43	31	69	228	7	23	288	246	594	412	334	52	717	466	138	199	318	473	46	123	257	189
1080	1323	993	957	32	29	73	208	6	35	243	251	596	436	296	63	691	446	154	195	333	477	51	125	283	216
1085	1437	1022	987	31	36	63	190	1	29	284	236	599	413	306	58	695	440	133	210	329	463	62	140	247	219
1076	1337	983	934	25	33	61	197	9	25	253	267	603	440	298	49	695	460	127	183	340	485	46	110	271	215
1173	1373	980	964	34	25	56	171	2	29	242	245	578	430	303	51	728	436	137	198	311	465	60	142	245	199
1100	1376	947	983	30	35	58	165	1	20	258	222	600	468	278	53	692	456	162	187	289	455	64	119	288	195
1065	1452	997	960	23	31	51	156	1	23	265	227	606	419	290	54	691	453	140	193	312	449	48	107	288	214
1040	1388	1012	918	47	33	55	158	2	17	259	236	536	459	299	48	718	407	137	246	342	441	67	112	286	200
1037	1314	928	895	32	23	47	148	1	15	262	234	588	460	263	60	666	473	156	206	323	417	47	92	297	229
1082	1357	961	986	28	39	31	145	6	25	276	229	593	384	283	63	711	481	158	192	329	478	56	112	260	203
1119	1413	1016	1008	24	21	40	183	2	27	257	266	598	340	312	52	713	505	126	217	309	492	53	87	251	202
1069	1326	944	890	22	21	36	154	1	19	240	242	583	393	263	73	709	470	145	183	320	437	61	80	259	216
1049	1324	984	916	16	32	40	161	5	18	252	262	574	338	280	61	717	445	135	179	307	451	54	104	250	186
1002	1312	998	889	20	23	45	139	2	18	259	260	549	324	289	59	695	462	135	155	327	424	51	109	223	203
971	1252	895	846	21	24	44	150	2	14	240	252	613	468	253	66	695	450	131	172	299	424	59	99	291	229
919	1196	906	802	32	31	36	151	5	21	247	256	566	463	252	58	681	470	122	161	279	440	48	105	259	229
967	1196	938	794	36	32	40	154	4	9	239	261	570	421	233	66	691	432	114	150	283	410	33	92	258	223
982	1283	992	888	29	35	42	146	1	20	259	284	576	374	256	57	692	458	114	142	336	421	43	87	231	218
1003	1208	939	863	27	19	38	174	4	8	265	226	561	391	255	56	676	428	121	141	299	453	39	84	231	230
951	1245	897	881	29	34	53	148	3	14	274	226	568	378	246	67	689	439	156	154	280	434	52	88	239	201
1008	1246	906	877	25	43	33	163	2	14	234	247	542	340	241	82	667	447	146	153	298	433	45	68	187	226
991	1209	931	841	28	40	37	155	0	12	230	266	554	377	251	65	667	427	150	160	318	371	37	90	210	205
962	1334	973	841	21	33	46	174	4	8	257	267	520	334	261	69	671	425	125	141	289	439	47	85	223	185
903	1278	908	862	21	33	37	157	3	18	279	244	542	385	241	67	663	408	108	132	294	402	50	96	252	208
1001	1196	939	912	21	29	45	181	3	15	248	248	542	383	266	80	649	426	98	126	318	399	58	90	262	222
962	1323	1001	910	21	34	55	167	2	11	247	276	531	341	305	58	622	441	102	142	332	421	68	86	244	193
878	1265	924	844	29	35	59	190	3	19	256	261	543	358	267	57	663	414	104	124	282	465	45	69	232	207
871	1205	936	792	19	22	57	183	2	31	247	238	576	464	240	70	628	446	123	123	273	426	46	81	266	226
903	1263	933	816	25	32	43	164	8	19	246	245	535	399	266	68	599	435	115	149	330	393	56	70	249	204
892	1272	918	796	25	32	41	198	2	21	221	241	538	392	248	83	622	381	149	131	280	406	61	89	239	216
867	1204	875	845	15	22	48	201	3	21	226	241	567	369	248	77	671	406	124	149	263	400	49	73	260	223
851	1153	919	789	17	27	47	199	3	25	226	236	564	389	237	79	650	396	105	163	290	394	57	94	231	235
931	1122	927	812	20	30	56	216	5	18	252	256	561	403	260	72	634	374	143	147	248	437	65	87	208	201
862	1121	882	742	17	32	60	201	5	20	241	216	550	423	243	75	605	368	116	144	265	402	67	94	221	229
933	1134	880	843	11	29	64	197	7	35	247	257	570	399	269	73	653	387	126	176	283	450	64	83	233	218
896	1127	890	811	21	29	47	200	4	23	220	247	572	445	251	74	645	398	148	186	273	398	51	84	240	208
929	1143	901	866	20	27	60	188	4	23	226	268	540	445	255	83	607	437	143	180	272	401	44	70	253	203
903	1145	896	851	18	23	55	191	7	25	228	231	579	383	266	56	698	385	121	149	266	386	50	96	274	218
901	1121	986	843	10	33	36	200	2	24	231	256	516	432	266	53	640	378	133	124	268	358	57	89	234	229
886	1111	951	806	15	24	55	172	8	19	249	231	526	362	277	63	600	410	140	132	255	368	65	91	251	207
879	1075	976	776	20	23	43	170	1	30	220	252	528	423	239	64	618	408	114	165	282	379	40	89	248	225
802	1065	893	717	13	21	45	174	7	21	224	224	551	411	220	47	600	387	108	137	244	355	38	79	246	214
846	1091	859	801	21	33	48	221	2	24	246	223	513	467	230	48	631	405	113	116	272	363	47	69	253	249
836	1064	835	764	20	28	52	185	5	23	225	236	521	477	229	53	547	404	122	143	262	363	38	75	247	239
836	1119	924	795	15	25	50	211	8	31	226	242	507	367	268	48	641	347	139	130	263	359	37	73	246	206
848	1108	928	817	18	17	55	197	5	33	214	242	517	469	267	72	599	368	115	118	248	377	37	93	260	211
879	1054	955	791	14	31	59	183	6	25	228	248	549	427	275	75	607	395	115	136	245	372	50	89	253	220
902	1031	946	776	14	17	59	187	3	26	211	261	501	469	256	74	605	375	113	131	253	368	42	83	242	211
877	1038	914	838	12	19	50	177	5	23	212	253	508	392	256	56	600	367	99	119	226	372	48	93	229	191
858	1025	908	796	11	21	41	195	1	23	222	266	495	410	253	38	625	345	97	127	252	352	64	90	205	181
866	1006	896	776	19	18	56	164	8	17	215	249	503	408	231	55	587	386	111	121	284	324	59	103	229	190
875	980	872	770	13	15	52	175	1	28	210	266	497	405	243	56	615	343	120	123	255	337	68	129	243	197
814	1046	888	777	18	12	36	180	2	23	223	276	507	360	265	68	599	358	85	120	238	324	62	130	234	215
770	949	836	669	11	16	51	172	5	21	218	239	517	378	225	55	582	357	112	93	240	306	55	113	245	204
817	1003	877	749	11	23	53	172	5	17	226	264	491	388	248	47	594	369	125	116	250	334	63	139	235	221
830	981	909	772	15	21	54	168	4	17	244	273	469	333	286	51	618	338	107	108	256	332	68	130	244	156
835	981	834	784	19	24	47	183	1	15	235	279	465	399	299	64	563	348	115	121	234	350	84	107	206	177
879	1095	953	800	14	25	57	190	5	18	257	278	469	329	330	58	604	341	141	138	274	348	56	81	201	187
894	1108	944	842	13	27	53	178	5	36	244	296	451	272	333	65	600	356	126	131	230	365	58	92	169	189
865	1035	868	822	12	21	56	177	1	22	213	271	498	394	294	62	617	353	131	135	267	348	50	109	216	172
829	1076	885	807	10	32	43	170	6	20	221	268	470	376	316	64	588	345	128	122	257	352	70	89	206	173
919	1057	976	816	11	36	50	180	3	28	231	289	482	282	333	76	607	360	136	134	275	349	66	94	199	161
916	1062	956	850	10	28	51	165	5	25	237	304	454	344	335	65	580	344	133	119	270	386	61	92	201	188
923	1102	983	815	7	25	40	148	4	17	267	274	435	310	321	87	582	316	130	135	243	390	57	90	181	156
896	1114	904	842	15	18	44	148	9	47	264	265	450	378	355	76	552	384	137	128	276	351	60	124	209	186
868	1144	911	873	9	22	47	157	12	41	237	295	440	337	359	69	585	323	135	117	231	380	51	98	204	162
862	1081	903	811	9	21	31	157	5	37	232	262	456	334	332	71	552	338	105	119	242	352	55	103	196	165
884	1083	930	803	12	20	40	169	10	41	256	279	431	344	342	82	554	319	135	110	257	365	63	92	198	154
910	1036	922	806	6	25	47	144	8	45	240	254	432	330	323	96	599	312	125	124	252	347	54	103	212	153
873	1026	880	766	11	20	34	164	5	37	221	261	475	348	320	80	611	354	126	114	225	378	84	114	214	207
872	1089	948	809	10	26	36	159	8	25	239	239	452	296	345	87	573	364	151	120	236	362	83	147	189	186
924	1101	952	861	7	11	41	156	7	30	240	264	465	323	385	83	586	365	120	143	250	329	89	135	184	164
901	1108	923	839	15	16	38	155	5	19	215	258	419	315	363	112	537	355	133	104	224	374	75	127	165	154
955	1152	956	866	14	18	57	158	2	28	239	274	458	340	380	88	555	314	121	127	221	378	93	152	169	139
995	1166	1005	889	6	27	37	186	3	27	234	256	374	336	392	69	486	295	117	119	214	367	68	144	142	166
918	1141	1001	837	7	20	49	187	2	19	231	258	454	420	360	93	572	312	136	136	215	368	65	170	199	181
891	1155	977	859	4	25	43	167	4	21	225	264	401	483	357	86	556	352	137	117	212	353	77	122	178	149
820	1058	943	851	4	21	41	173	0	19	235	252	504	485	358	91	587	352	117	145	234	368	65	122	182	199
853	1089	960	863	11	22	46	145	6	19	224	267	475	454	331	123	589	351	136	120	231	356	76	104	201	185
902	1095	994	863	9	11	51	161	2	32	230	266	460	367	348	111	566	345	103	114	231	391	63	111	190	149
891	1074	952	804	9	17	48	142	8	27	227	244	423	380	324	117	533	343	113	114	256	337	65	106	206	142
918	1102	1018	819	6	16	42	142	1	28	241	253	474	327	329	119	570	362	91	111	222	359	52	117	200	170
877	1040	920	793	11	22	40	153	4	24	238	237	467	369	298	133	597	379	98	122	255	308	53	103	219	187
819	1078	918	781	6	24	42	170	4	34	205	249	474	381	319	126	582	357	103	111	258	350	64	109	219	183
905	1090	1013	834	12	19	56	171	11	31	244	271	469	292	349	107	592	333	114	124	237	346	57	88	190	128
863	1049	930	861	10	21	32	129	3	30	248	251	417	313	327	100	559	360	108	121	212	387	53	100	188	167
855	1092	999	819	7	25	37	180	2	43	268	237	437	389	327	119	557	325	119	135	222	369	72	106	193	173
846	1046	960	799	13	19	41	171	1	19	228	283	460	396	306	108	609	324	124	109	233	340	69	99	195	206
854	1009	936	786	7	18	41	125	2	20	240	265	437	421	327	120	552	354	97	135	219	364	66	93	207	182
834	1098	1010	803	4	16	40	130	3	20	235	267	445	313	314	128	511	340	133	113	225	355	45	85	182	173
825	1016	931	818	8	17	43	165	7	27	227	243	427	338	279	134	530	318	98	131	243	315	46	80	230	174
838	1093	1013	790	8	22	44	189	0	17	209	279	473	306	314	158	525	335	117	119	217	372	48	73	213	145
810	1047	944	781	14	11	45	199	6	32	224	259	480	351	284	160	554	349	120	106	232	370	45	81	178	189
904	1118	1039	825	8	11	50	218	7	34	228	265	412	301	321	134	515	320	107	117	238	392	40	73	176	160
953	1081	976	824	7	14	51	226	9	21	203	265	405	340	293	130	529	303	134	109	234	357	45	60	193	161
884	1177	1000	881	8	17	55	199	9	32	235	267	383	277	321	114	507	284	125	140	217	378	50	60	169	164
918	1082	996	838	4	18	51	208	3	30	231	270	387	272	304	125	497	311	125	110	223	360	46	75	180	141
851	1110	970	801	10	11	37	171	5	36	246	259	327	316	298	120	443	280	115	95	213	370	45	77	178	143
911	1119	930	889	11	14	40	164	4	36	236	278	368	357	317	112	492	289	98	102	227	394	62	68	177	180
850	1064	991	753	9	14	45	155	3	39	248	259	422	372	302	108	528	294	104	101	220	337	60	69	197	162
803	1086	942	752	2	13	46	150	10	37	233	283	454	351	299	106	573	300	89	84	249	347	54	52	219	164
784	1075	900	739	10	13	46	141	5	39	238	277	422	302	292	94	510	324	86	102	229	296	67	39	193	180
859	1085	984	763	8	17	33	126	5	38	233	327	435	286	302	109	504	307	76	102	221	362	53	53	179	147
807	980	900	808	11	18	31	132	13	29	229	282	413	381	291	96	527	278	82	99	211	319	49	58	227	141
867	1034	955	810	8	16	37	166	6	29	244	270	408	397	310	122	505	320	105	121	210	326	33	38	185	176
800	1095	941	819	8	21	36	157	4	34	209	299	435	295	296	126	514	313	113	124	200	322	52	45	198	153
871	1031	962	813	12	17	21	175	13	35	231	296	438	320	309	114	514	311	108	144	218	327	71	48	204	148
834	1034	931	811	13	20	34	143	4	33	219	307	444	382	283	118	488	317	112	142	216	345	54	56	185	183
830	979	887	798	9	20	44	159	5	28	246	281	426	449	287	119	494	314	106	166	228	320	46	58	221	168
812	1110	1000	787	7	12	41	158	5	23	224	297	385	308	293	131	501	272	112	152	197	348	47	59	164	154
835	1009	930	787	11	14	34	163	8	34	234	276	424	388	271	138	482	304	130	132	233	325	60	52	184	157
818	1041	933	799	12	21	45	169	7	38	241	271	396	366	259	142	501	308	140	126	198	338	59	68	186	152
768	995	941	745	7	20	38	154	10	37	214	261	400	327	235	143	421	321	122	127	196	307	67	75	178	145
855	1045	928	855	6	28	45	169	10	49	230	296	394	323	277	125	484	268	118	139	197	333	59	70	174	148
847	1063	972	800	5	23	45	139	7	42	243	313	434	366	298	127	498	273	112	125	234	323	58	72	171	148
860	1082	999	827	15	19	30	181	6	38	235	315	385	340	319	99	481	267	110	146	215	312	70	71	148	149
847	1148	1009	866	8	10	49	172	8	45	247	330	394	318	325	98	445	267	100	161	204	374	55	66	196	140
844	1096	960	843	7	20	33	152	13	40	247	322	405	352	319	85	515	287	132	135	206	376	60	67	199	130
828	1098	923	823	6	19	40	133	8	50	228	291	420	412	301	82	447	277	133	162	229	319	77	73	212	141
871	1035	983	784	12	19	25	139	7	35	244	274	420	321	289	103	482	269	160	182	229	358	67	72	202	146
872	1098	1090	823	3	18	35	138	6	44	226	273	390	306	283	131	467	256	154	192	208	345	63	61	156	119
809	1133	1061	796	5	17	24	146	6	40	216	275	374	386	304	87	477	254	141	177	206	367	74	74	184	168
834	1175	1090	828	10	18	31	145	5	49	245	272	399	303	325	108	501	246	167	172	237	341	70	67	166	127
842	1131	1029	802	7	15	41	152	5	38	231	262	431	328	316	77	491	264	159	160	192	360	51	63	180	162
878	1068	1000	816	13	16	44	176	6	38	244	270	413	300	275	59	480	274	138	187	227	332	54	62	163	168
870	1065	1063	740	10	22	42	154	3	37	224	236	451	339	262	88	501	293	148	150	238	324	53	88	186	188
838	1053	984	762	9	22	29	163	3	44	213	268	421	293	262	91	471	265	128	167	221	329	77	76	187	167
791	1050	979	741	12	22	34	150	8	29	214	281	425	368	232	112	489	276	113	129	211	293	65	86	151	142
789	988	955	687	10	16	27	150	3	29	206	241	448	351	228	94	473	292	111	137	194	322	77	57	179	178
855	1004	983	731	14	18	31	149	4	37	180	281	434	335	222	99	479	254	118	140	215	321	78	72	153	127
775	1042	979	751	9	17	38	159	12	38	182	273	438	373	219	151	472	277	94	106	215	325	64	62	182	162
827	967	931	673	6	23	21	134	8	46	184	243	441	421	196	120	471	265	91	117	187	315	51	77	225	162
785	968	907	766	6	18	35	137	3	37	204	245	467	435	185	95	478	282	96	110	192	320	59	77	193	164
786	1013	954	713	12	18	31	142	4	32	182	237	420	411	205	116	507	309	79	98	208	336	71	87	208	172
719	1010	911	732	8	14	33	127	6	33	210	237	425	381	221	110	475	269	95	81	219	270	51	72	191	153
722	1002	860	714	7	17	34	120	5	37	172	261	448	399	183	123	469	265	99	86	185	310	70	67	175	162
748	981	873	687	11	15	21	115	9	31	193	241	410	380	174	135	454	256	78	109	203	293	61	68	210	168
765	953	923	655	9	23	27	112	6	30	194	254	430	420	188	143	471	258	102	122	191	294	53	68	195	166
803	895	877	675	7	20	26	137	3	43	182	270	399	434	181	90	472	258	95	123	213	312	44	73	214	139
703	871	845	635	11	18	32	115	4	31	168	249	379	381	156	100	435	217	116	96	207	279	48	58	157	154
735	959	966	679	5	18	23	108	5	23	207	264	446	350	165	103	450	253	96	133	213	316	46	46	188	146
666	912	850	633	9	23	20	109	4	39	191	244	428	469	155	71	436	280	94	130	191	300	49	50	215	182
670	828	787	586	8	13	22	82	3	22	181	206	390	501	131	58	421	245	111	141	177	272	45	54	220	174
654	857	813	583	7	18	24	81	3	32	201	213	399	489	147	52	401	255	112	134	180	280	51	56	221	167
718	785	803	610	6	12	24	81	10	24	174	205	402	495	138	63	413	289	120	117	191	295	49	52	227	184
678	801	815	630	14	17	29	98	5	25	193	242	414	503	139	61	443	245	124	119	207	253	39	52	218	183
480	596	568	438	5	13	24	75	4	14	125	171	278	346	107	33	307	175	79	99	133	199	27	44	141	146
647	808	782	597	4	15	25	99	5	30	184	245	390	490	141	49	423	245	137	153	195	252	44	52	211	174
631	755	777	530	8	15	19	96	6	21	177	205	391	458	128	34	417	227	132	157	202	263	44	35	205	185
583	803	747	575	10	15	26	87	4	31	168	234	406	479	128	42	412	247	128	170	195	278	35	46	190	207
604	794	733	577	9	15	22	90	7	32	176	199	352	507	126	30	418	231	124	154	182	233	40	46	217	185
599	738	680	543	7	19	30	105	5	14	165	220	342	507	130	34	388	226	125	142	177	260	38	62	206	188
585	757	702	499	10	15	32	96	3	21	152	228	328	479	116	40	358	223	116	114	183	227	46	43	180	186
620	737	673	534	13	21	38	87	3	23	172	209	352	481	122	33	375	214	141	128	189	238	29	49	196	180
601	769	681	549	14	21	30	87	3	26	173	201	371	472	120	39	383	211	131	152	191	261	43	51	229	171
640	756	665	506	13	17	26	120	6	26	154	197	316	472	125	24	363	228	141	137	172	255	35	54	175	187
587	752	654	507	11	15	26	100	11	16	156	198	323	469	118	28	376	235	134	142	157	269	43	50	173	177
594	731	637	498	9	10	40	85	9	27	161	212	330	457	118	28	399	222	118	151	170	255	33	54	199	172
597	769	721	486	6	10	28	97	8	34	156	210	329	455	121	28	366	221	120	142	180	239	34	35	196	170
576	790	693	519	8	14	27	98	9	28	174	201	357	438	121	42	385	228	100	154	162	243	43	39	200	166
627	756	724	546	11	11	32	89	3	30	153	204	352	511	123	36	382	231	125	142	184	245	34	35	213	180
594	716	718	504	9	13	25	103	5	25	154	171	315	457	118	48	372	215	117	127	175	235	32	40	187	153
601	796	668	520	7	13	36	102	7	23	153	208	351	473	114	39	369	243	119	109	172	238	43	45	180	178
660	788	731	561	11	10	30	107	7	30	166	187	364	504	130	49	374	253	108	118	195	241	31	38	186	169
624	811	764	560	5	15	43	84	10	32	158	219	351	527	118	63	396	263	114	122	184	248	36	46	175	184
642	815	776	590	4	17	26	131	6	35	172	214	347	486	139	48	411	250	102	102	190	242	49	54	199	179
653	763	685	598	2	10	33	95	4	27	166	190	362	439	145	39	427	242	85	98	184	211	34	34	154	174
670	840	757	553	9	13	39	83	6	34	153	222	369	523	136	60	416	261	80	94	177	235	30	44	182	170
663	819	777	589	4	10	31	90	7	26	142	221	343	518	141	41	390	272	86	92	196	228	30	47	164	175
710	868	795	676	12	17	32	129	5	31	160	246	367	505	131	59	418	282	98	106	189	284	40	36	179	165
628	720	681	561	1	14	34	114	8	25	139	195	315	504	130	43	383	233	66	83	190	235	28	34	149	163
633	827	767	552	7	19	31	113	9	32	172	219	359	518	124	57	412	263	79	92	198	250	33	44	167	175
657	916	786	621	9	14	31	121	5	31	157	267	379	452	139	68	437	233	74	60	174	301	31	44	132	156
765	944	916	679	7	8	30	97	5	23	170	273	412	342	173	64	439	249	91	85	217	337	37	52	129	114
726	979	824	690	7	11	35	115	11	27	186	246	393	406	154	74	441	243	129	100	193	309	30	45	146	157
791	936	819	667	1	14	21	105	5	26	182	233	384	400	153	76	467	224	112	105	208	298	34	43	131	136
705	949	845	653	9	18	39	92	2	23	150	263	395	386	158	55	456	239	93	103	179	340	33	43	145	149
733	982	873	692	6	11	31	87	7	30	172	262	377	312	151	70	428	223	108	89	195	349	33	44	123	124
795	984	890	686	7	10	27	115	3	45	162	267	416	321	174	76	441	238	125	114	219	320	40	45	131	142
731	1014	876	724	9	7	37	128	2	44	163	264	397	371	171	83	448	231	126	121	185	352	55	52	134	135
783	986	871	705	13	10	45	126	11	34	175	228	442	311	167	93	435	239	102	102	192	332	39	50	129	131
587	720	641	550	3	10	39	89	4	27	137	169	284	253	108	66	302	203	90	100	146	237	25	42	106	96
871	1053	939	752	3	9	47	150	11	49	163	261	398	238	201	99	394	203	149	148	214	343	51	62	98	82
831	1075	977	775	8	9	39	156	10	44	166	254	390	276	188	120	460	204	139	137	198	368	32	61	139	91
811	1049	946	758	5	11	36	132	9	29	166	214	364	280	188	104	454	244	125	139	213	354	29	39	108	118
829	1000	960	697	6	14	43	129	8	29	163	228	389	279	183	88	407	230	107	110	200	332	40	54	127	125
852	1046	998	744	9	13	39	123	8	27	187	206	404	248	206	109	415	224	123	138	225	362	41	49	112	127
839	1074	1007	714	2	12	26	110	5	22	182	180	410	303	196	112	431	255	109	132	217	341	32	59	123	134
776	944	923	618	6	8	33	78	8	27	168	194	397	341	143	122	424	233	103	106	200	332	29	52	174	165
776	1010	936	708	6	12	44	114	5	28	168	172	399	315	162	104	444	258	80	105	223	288	41	76	144	130
621	858	750	576	4	4	38	75	12	17	144	129	307	184	159	69	336	187	69	91	178	254	23	47	100	86
778	1047	977	685	2	7	33	128	1	27	166	152	369	256	166	106	401	227	76	106	225	299	35	64	117	115
838	1058	1042	731	5	11	29	103	6	33	175	151	383	217	201	123	407	246	79	94	233	350	38	58	110	110
807	963	974	697	4	11	38	105	4	30	164	147	393	241	183	125	477	229	91	100	202	353	25	60	119	148
780	980	986	676	2	5	39	105	8	22	158	139	414	259	181	130	442	242	77	111	226	318	35	46	141	130
640	870	757	624	7	10	36	106	7	21	142	117	350	345	138	92	383	226	68	96	193	257	26	40	152	161
701	901	840	675	3	7	45	109	0	36	159	129	387	409	131	112	433	251	123	118	186	262	32	56	182	167
726	857	838	602	8	6	35	88	4	32	149	142	379	345	126	91	417	208	101	118	188	266	48	58	163	174
787	916	919	631	4	3	33	92	9	36	160	142	420	297	130	111	437	226	102	129	235	276	32	62	167	148
736	869	883	623	5	5	36	82	6	29	155	163	414	332	143	109	415	255	95	114	205	262	33	47	175	175
630	832	763	545	3	7	28	75	7	31	118	159	385	412	106	108	373	239	90	104	186	226	26	70	180	201
675	879	821	568	4	7	32	74	7	31	136	178	395	420	126	100	415	249	93	105	182	285	46	84	200	169
647	813	799	568	5	6	21	81	5	37	131	152	375	383	124	74	424	235	103	131	176	287	44	92	165	184
642	796	756	568	3	9	29	91	2	38	143	129	379	449	124	74	397	240	102	130	201	255	43	83	173	186
610	725	702	507	1	7	32	77	10	50	127	142	340	437	112	61	359	248	82	117	167	232	32	71	194	162
736	821	802	573	2	15	24	104	4	38	152	176	389	394	135	66	440	244	105	128	195	266	57	71	163	178
643	856	770	566	6	6	44	89	10	34	137	185	393	437	124	55	404	247	116	134	189	270	56	84	164	187
696	849	855	573	7	6	40	92	3	52	134	157	387	431	133	58	411	246	126	110	210	249	50	93	159	199
594	826	724	532	5	5	42	84	10	41	140	146	355	464	116	55	367	240	115	129	170	237	47	67	157	177
637	732	720	469	2	12	30	82	8	34	123	146	345	491	106	52	363	255	116	108	153	230	51	90	185	192
559	810	755	488	2	4	36	78	4	41	120	153	336	488	106	63	373	263	95	127	170	231	67	91	187	179
544	695	668	438	5	7	26	77	11	41	116	131	306	490	100	52	355	214	94	98	154	199	68	90	187	179
588	683	678	496	0	11	38	70	8	38	119	138	308	545	102	60	345	227	105	123	179	236	49	104	168	208
551	700	674	485	5	7	26	90	13	38	112	140	318	516	103	63	340	215	100	122	174	200	57	87	155	181
589	728	728	503	5	9	29	84	7	43	125	140	336	569	103	64	373	263	129	131	186	218	53	93	184	165
586	758	725	507	5	4	30	81	17	55	126	154	306	522	122	47	378	229	125	124	170	241	41	87	170	174
515	604	588	406	4	12	25	65	15	52	102	119	258	452	97	46	318	197	106	107	149	186	40	99	156	152
525	649	659	431	6	8	20	57	17	56	121	117	302	539	103	48	385	186	106	110	143	220	61	99	179	176
568	680	676	466	6	12	25	66	18	54	128	135	318	493	107	45	386	219	118	146	160	228	48	127	168	184
586	631	656	446	8	10	33	70	11	41	133	126	322	567	98	55	364	189	114	136	133	210	55	91	170	154
546	691	653	451	6	8	25	59	17	53	125	126	299	586	97	54	358	229	136	120	168	211	61	128	178	169
393	509	472	358	6	11	23	52	13	44	84	108	236	423	84	46	245	187	79	94	125	153	42	75	131	139
572	700	666	462	5	12	29	65	14	45	123	133	333	559	90	85	379	220	106	143	148	223	71	118	177	199
601	771	685	530	4	12	21	60	4	58	139	141	329	557	107	71	391	226	94	129	163	230	76	145	167	188
588	675	673	463	5	13	29	69	12	47	110	139	291	541	101	66	350	226	92	106	161	212	76	125	160	168
569	667	625	454	5	11	25	65	10	39	116	116	336	469	105	58	366	198	100	118	147	209	76	141	172	170
526	679	607	457	5	13	23	62	6	54	123	115	281	532	96	78	366	206	97	120	152	197	61	147	156	174
631	715	670	471	5	9	35	75	9	40	145	134	322	535	114	69	388	204	93	105	171	225	73	149	149	167
573	667	613	472	3	15	32	49	13	55	126	120	304	580	110	53	389	191	106	112	146	218	70	140	186	170
525	626	599	419	2	12	32	55	7	53	99	125	301	516	87	68	322	224	109	120	134	213	83	143	183	200
520	622	594	386	6	7	30	56	7	47	122	107	292	533	106	69	367	208	118	100	149	193	86	171	181	180
538	622	566	457	7	14	25	83	15	49	105	122	320	561	92	65	390	217	97	123	164	188	80	191	200	188
542	640	587	429	4	12	39	64	10	46	109	133	330	558	107	68	386	235	119	115	142	223	89	180	211	168
659	774	702	556	7	4	27	70	11	43	145	119	359	499	122	73	416	253	100	144	206	245	89	212	172	141
629	724	710	495	2	8	21	64	11	51	109	150	370	488	115	59	377	261	109	129	136	250	79	170	205	167
394	476	403	338	2	8	12	42	9	33	89	82	226	240	79	27	257	139	74	85	97	162	60	121	117	107
630	701	653	499	2	6	21	69	15	47	122	124	341	359	123	38	405	203	123	133	159	233	79	186	207	167
584	708	657	503	1	8	26	72	13	45	132	137	350	407	116	40	422	229	118	127	170	250	81	181	165	211
552	633	635	445	6	6	20	69	11	41	111	135	309	428	114	43	371	217	123	131	165	208	80	168	192	159
651	755	720	532	4	10	31	101	12	50	149	139	382	321	124	50	430	214	127	176	159	239	104	189	160	170
576	673	634	499	4	5	40	80	10	68	120	123	382	294	109	51	408	210	126	147	157	250	103	169	209	172
575	683	614	470	1	14	25	66	9	45	124	118	336	413	105	69	413	227	145	124	135	217	102	195	176	199
597	694	647	496	5	10	23	64	8	52	111	124	351	404	108	62	390	237	123	149	139	218	75	166	174	196
613	753	698	528	3	8	19	70	10	63	115	140	381	265	113	69	398	221	127	169	177	234	94	182	172	200
593	753	694	495	3	9	24	59	10	50	110	157	355	302	118	59	431	224	137	136	152	231	86	166	202	177
589	713	645	444	2	5	26	75	6	49	109	138	350	368	105	65	395	263	101	133	129	227	78	170	183	190
624	821	653	490	4	8	35	70	4	22	130	130	328	444	134	73	348	236	108	137	164	239	79	145	187	167
627	815	723	518	9	13	23	74	2	36	112	148	365	333	133	57	364	222	131	150	170	213	84	151	155	133
562	669	551	401	2	10	20	58	3	25	104	119	317	316	105	58	326	211	122	128	131	196	69	97	171	180
578	783	671	490	8	5	29	74	7	22	120	152	346	378	109	85	344	270	141	161	166	231	78	132	155	166
574	726	623	468	5	9	35	85	2	23	119	137	343	346	108	57	354	253	146	152	141	221	71	142	172	189
596	763	649	459	2	13	36	73	4	15	112	133	353	357	123	49	377	210	157	165	149	219	55	138	161	185
593	745	602	463	4	12	26	75	7	27	116	141	327	373	116	64	371	229	140	151	135	228	83	140	183	167
595	699	602	472	5	7	20	82	3	17	119	138	320	391	102	64	394	214	125	139	151	201	64	179	177	182
368	483	383	275	2	3	24	53	3	13	76	99	200	259	65	46	247	131	88	73	76	132	56	96	110	130
574	776	644	482	6	7	37	95	7	22	120	149	317	378	115	69	382	244	132	180	146	228	78	183	180	198
607	740	631	499	5	10	27	94	7	34	123	163	359	390	106	75	384	202	120	114	128	209	81	180	164	163
570	747	648	496	6	10	30	104	4	31	127	157	339	352	114	65	381	219	109	128	162	215	87	214	175	173
582	699	633	411	4	7	28	83	5	32	127	150	313	377	111	53	363	221	113	136	145	210	66	144	181	158
511	715	581	423	7	10	38	77	6	26	115	143	299	319	122	47	374	211	120	129	130	205	63	136	184	173
559	753	659	465	4	9	38	109	7	33	132	166	361	357	115	54	384	214	123	133	144	226	68	131	194	185
633	795	717	542	10	13	34	102	7	33	122	163	378	232	123	47	370	266	119	138	154	208	56	118	166	146
555	777	709	493	8	9	27	108	3	25	138	155	364	310	122	60	403	202	139	110	151	199	86	154	146	184
622	743	672	498	7	3	22	97	8	33	128	155	362	254	115	50	370	211	117	129	146	215	79	183	156	173
659	730	699	503	4	3	28	130	5	44	135	153	341	303	124	54	408	214	130	143	140	224	87	172	179	175
569	787	664	505	5	14	35	114	6	34	136	151	364	240	110	71	415	238	147	138	133	226	77	214	169	184
602	788	721	517	6	14	29	93	5	37	146	153	353	256	120	68	402	238	146	151	150	226	77	168	149	198
611	801	732	535	4	6	33	121	8	38	125	153	367	197	125	59	383	230	147	152	160	222	79	180	148	141
624	761	706	533	4	10	46	111	6	31	124	137	334	289	111	64	346	226	156	147	144	223	92	168	159	152
589	778	667	510	0	12	30	103	7	30	144	151	342	242	120	45	414	205	127	138	142	243	109	189	203	162
635	779	696	520	3	10	39	116	4	48	127	143	372	217	105	55	374	231	131	151	168	213	89	154	166	179
619	734	647	560	7	5	26	105	7	37	144	134	353	297	115	54	348	245	152	134	141	224	103	186	183	181
359	467	423	322	3	4	24	68	6	20	78	94	210	187	64	31	250	122	91	90	85	137	51	114	113	100
0	0	0	0	0	0	0	0	0	0	0	0	0	0	0	0	0	0	0	0	0	0	0	0	0	0
390	493	433	320	1	3	21	69	4	20	82	81	209	256	68	24	235	145	87	96	84	151	68	108	113	128
642	723	704	469	5	10	30	100	5	41	118	129	337	380	107	55	389	206	161	125	159	225	94	222	178	194
565	758	674	485	9	6	37	71	5	33	114	137	363	298	112	48	356	218	164	104	149	237	89	176	179	211
649	826	779	540	3	9	25	101	5	37	127	151	379	201	124	59	360	206	177	135	166	247	86	163	158	142
625	771	753	534	3	9	29	84	10	39	122	167	356	281	107	56	390	246	159	143	165	234	119	215	154	173
633	840	788	546	3	7	25	96	9	28	135	148	394	170	115	60	418	249	160	155	137	242	113	208	164	162
665	799	789	554	7	8	25	85	6	45	128	151	371	164	116	62	378	261	166	126	144	244	99	163	145	142
575	738	677	495	3	5	26	66	10	38	114	139	327	150	103	53	331	221	145	119	139	199	77	131	144	148
685	877	793	572	2	10	17	91	5	45	128	165	391	144	135	53	423	214	182	141	146	257	86	229	166	153
614	801	736	504	6	7	32	82	9	44	141	155	369	240	113	57	416	229	143	138	147	239	99	212	176	166

## Sheet: KO PTX rep 3
A3111	A4111	A4112	C4111	A3211	A3212	A4211	B4212	C4211	C4212	A3311	A3312	C3311	C3312	A4311	A4312	B4311	B4312	A3411	A3412	A4411	A4412	C4411	A3121	A3122	C3121	A4121	A4122	C4122	A3222	C3221	C3222	A4222	B4221	B4222	C4221	A3321	A3322	C3321	C3322	A4321	B4322	C3421	C3422	A4421	A4422	A4423	A4424	B4422	C4421
761	93	122	148	409	429	721	46	48	15	80	38	1321	307	180	253	38	1290	180	308	43	89	2	92	353	34	149	312	239	15	144	867	25	200	37	4	37	75	206	72	3	111	236	478	118	35	75	30	14	0
932	54	86	147	498	510	547	35	46	12	75	40	1347	277	95	191	41	1380	156	349	38	63	1	121	357	20	108	186	203	18	189	830	13	215	40	2	37	111	187	63	1	151	234	468	77	20	54	15	17	0
899	94	87	125	526	462	609	41	47	15	61	41	1389	265	155	200	44	1273	172	345	53	72	3	123	366	23	156	245	234	18	155	839	18	216	61	3	37	101	200	60	2	99	246	478	121	41	40	16	29	2
761	87	97	153	473	437	733	26	44	14	63	35	1331	246	145	219	45	1316	173	333	45	79	0	111	352	26	173	279	238	24	154	895	17	206	21	2	39	94	236	50	6	88	246	509	147	30	47	23	23	1
768	80	97	149	435	465	577	34	45	22	63	40	1244	274	121	222	54	1264	180	330	32	75	4	112	314	21	148	235	223	20	150	835	13	204	36	1	43	82	261	60	1	103	236	479	119	36	55	19	12	3
800	73	122	144	488	442	666	27	39	14	54	22	1343	243	130	234	33	1367	178	310	35	71	2	107	277	30	176	266	226	15	143	820	15	218	29	1	36	74	222	75	4	103	236	506	121	30	64	21	22	3
855	58	101	145	486	462	591	36	33	22	63	48	1266	194	113	219	30	1317	166	352	36	64	2	115	361	26	131	227	209	25	192	844	9	204	27	1	54	106	255	66	3	89	239	518	107	29	60	30	21	1
831	82	93	164	437	473	605	38	53	19	71	38	1396	237	142	223	29	1233	172	327	31	86	2	137	354	39	143	276	241	25	157	886	16	190	32	1	52	101	270	58	4	102	254	535	107	28	54	12	31	1
713	75	83	143	425	423	633	29	50	19	68	35	1191	257	132	213	31	1176	177	330	47	90	0	125	383	31	153	252	232	20	146	841	19	195	27	0	43	99	216	65	1	116	196	511	122	29	46	23	15	0
953	70	80	133	544	548	495	32	29	22	54	49	1183	218	138	183	26	1125	205	386	45	59	0	147	398	39	134	231	205	20	142	740	12	240	36	2	47	111	241	81	3	88	219	481	100	29	46	13	14	3
705	82	112	128	353	383	581	27	55	18	63	28	1314	250	149	233	23	1158	174	316	52	105	1	102	352	25	171	259	228	22	177	845	19	233	39	1	33	95	277	72	1	109	203	507	117	43	54	30	30	0
888	90	112	121	498	463	677	31	43	15	63	20	1314	190	162	280	22	1216	198	334	47	88	2	135	367	22	174	282	243	20	202	740	15	257	31	2	38	91	253	55	6	108	202	460	136	40	77	33	22	1
746	94	114	138	387	415	659	20	45	13	66	43	1371	302	175	242	13	1197	158	331	63	92	2	108	359	21	168	277	243	14	206	986	21	225	38	4	35	91	307	82	5	94	271	551	140	44	57	22	30	2
898	88	129	163	476	489	674	30	52	21	51	47	1244	221	165	278	18	1199	209	354	50	93	0	126	409	23	197	240	229	25	160	845	17	209	46	3	37	91	285	63	2	90	202	494	131	36	82	27	27	3
689	95	114	141	376	389	606	39	58	25	48	30	1344	250	164	213	25	1262	139	298	66	85	3	102	348	19	150	250	228	14	172	836	19	243	28	4	44	87	268	73	2	100	229	489	127	34	44	23	30	1
695	96	115	165	407	399	648	34	47	20	65	38	1268	214	155	221	23	1287	163	345	62	88	0	109	374	24	169	295	259	26	157	816	26	235	45	4	44	82	249	79	8	93	218	435	140	35	60	27	34	1
1010	80	90	166	522	545	602	33	47	23	72	43	1228	224	130	232	28	1214	219	350	46	75	2	139	409	26	141	245	233	21	161	849	20	204	42	3	47	96	271	68	1	91	213	472	108	38	68	26	32	1
855	73	114	163	497	489	595	34	63	24	58	39	1300	185	138	223	24	1138	191	345	47	83	4	125	381	26	179	251	262	12	166	892	21	230	41	2	41	104	238	53	4	56	253	471	121	40	69	28	25	3
791	78	97	158	462	463	642	43	45	18	83	50	1258	200	173	241	29	1239	183	369	42	116	6	143	389	21	158	272	275	13	190	785	12	236	45	4	55	106	267	79	2	85	238	492	126	44	76	27	31	0
857	80	105	136	436	518	609	55	48	21	101	47	1207	301	155	232	35	1243	206	334	50	73	2	126	420	25	167	288	230	9	197	884	21	218	41	1	52	113	296	90	7	81	221	531	112	32	77	42	29	2
901	73	91	137	458	517	707	36	45	19	94	56	1076	258	144	238	52	1306	199	398	41	96	1	147	416	23	164	264	257	20	206	851	18	211	32	2	55	118	236	76	2	59	240	541	123	43	71	27	31	1
757	60	61	149	427	388	533	29	39	16	80	52	1165	266	141	223	31	1285	169	326	48	65	2	130	356	22	104	239	248	12	196	810	16	220	38	6	53	99	265	90	4	69	226	501	119	39	75	15	32	3
869	65	102	139	460	451	565	35	58	19	96	50	1159	221	139	221	38	1220	182	356	43	93	5	122	396	27	150	262	259	18	162	754	18	215	37	5	40	108	269	83	0	55	196	485	121	38	85	28	33	1
809	88	136	183	427	444	674	29	56	19	102	47	1137	215	174	227	29	1157	170	345	61	101	3	127	400	31	179	305	260	27	171	782	26	233	44	3	45	122	263	75	6	84	296	449	134	24	59	31	33	2
787	70	106	139	424	423	680	30	43	19	87	69	1096	272	149	262	22	1148	165	338	40	88	4	129	393	33	171	328	231	17	188	887	22	230	57	3	63	111	237	73	3	57	313	451	134	33	89	22	34	2
806	94	103	159	412	435	673	24	46	24	98	51	1172	332	165	216	30	1206	183	299	58	84	2	141	374	27	173	283	245	14	199	900	19	237	45	2	52	104	232	91	1	61	308	408	125	26	58	38	30	1
793	64	87	189	439	413	746	30	66	22	97	44	1106	251	173	227	30	1138	176	314	44	99	4	155	359	26	150	287	243	24	176	779	25	190	40	2	48	118	223	69	5	69	278	462	115	37	92	47	22	1
666	56	80	171	335	398	554	40	54	25	87	38	1181	227	125	185	29	1310	155	300	42	80	7	109	363	34	138	238	246	16	177	857	20	236	55	3	42	105	229	58	5	66	253	493	115	34	73	32	23	1
660	77	120	150	341	388	666	27	58	23	82	52	1336	311	151	266	33	1139	165	289	46	103	8	130	360	21	179	309	276	19	198	881	28	237	52	3	49	116	250	77	4	67	257	534	141	34	76	35	23	2
640	69	90	143	364	371	694	37	50	19	90	39	1357	251	163	243	29	1267	145	270	42	95	5	107	321	33	167	282	265	14	178	884	13	211	50	6	49	94	236	64	2	67	205	501	115	28	87	44	29	2
775	74	90	132	435	418	613	21	46	19	94	39	1262	266	150	247	35	1121	155	288	46	87	4	121	369	34	148	264	228	17	168	814	19	241	38	2	50	110	214	59	2	85	243	473	125	36	79	47	26	1
1031	93	98	150	523	524	678	35	48	22	102	63	1247	239	128	259	31	1289	174	348	53	85	3	135	423	34	187	317	222	16	149	892	23	233	49	4	49	107	261	56	3	86	261	443	126	34	86	38	30	2
893	94	130	119	431	463	684	35	48	20	87	58	1280	213	192	262	26	1160	140	328	41	97	1	127	422	31	169	341	253	10	177	873	23	213	46	1	56	104	266	79	2	78	251	483	141	32	114	52	18	0
800	68	103	161	419	412	596	38	47	20	76	44	1268	225	160	208	21	1264	167	303	31	73	6	115	391	29	166	276	259	11	153	895	16	252	41	6	50	126	235	78	6	91	250	414	114	30	85	30	17	1
468	42	74	85	243	265	374	17	26	8	58	38	791	159	105	142	13	731	90	188	22	64	1	74	231	25	84	193	160	9	131	544	22	148	29	1	38	58	156	48	1	60	154	318	75	21	49	17	10	0
394	42	46	89	219	205	264	11	18	12	36	10	529	107	63	101	17	406	77	135	22	30	0	51	156	11	79	119	123	2	77	403	6	86	23	5	19	36	123	39	4	42	120	199	48	14	28	12	4	0
1462	95	118	196	718	698	857	37	48	20	149	61	1414	331	174	249	28	1182	240	416	61	90	3	238	529	34	218	335	316	23	244	1020	31	281	62	10	86	143	367	93	7	75	310	580	171	55	66	28	25	2
1252	183	206	208	598	564	1114	40	71	29	120	79	1375	303	368	425	37	1193	220	358	132	209	12	276	506	42	324	463	302	25	214	967	35	301	60	7	86	123	343	94	5	98	313	543	219	113	76	36	24	2
1122	153	185	211	516	595	1240	30	65	37	144	70	1593	316	481	407	30	1205	222	337	155	237	4	243	496	36	384	423	309	30	276	1081	32	312	70	7	69	117	416	114	13	90	373	478	217	120	59	41	37	1
1065	122	143	182	502	513	1064	40	52	27	121	85	1462	302	373	413	29	1292	211	336	158	197	4	259	456	40	335	315	330	22	252	981	30	288	62	5	65	130	391	106	5	111	312	482	210	143	73	34	44	0
1169	104	150	227	590	590	981	32	50	35	112	84	1521	324	385	394	31	1322	229	401	138	203	9	286	531	42	303	343	315	30	283	1023	22	281	67	6	72	132	432	115	7	127	314	557	189	146	79	42	28	3
1060	101	158	241	513	541	953	33	41	32	135	84	1543	272	410	400	46	1334	229	404	140	206	4	244	506	44	294	334	360	18	247	1179	39	289	55	9	81	149	444	142	7	203	348	585	218	138	67	37	31	2
1101	116	163	237	549	591	980	44	58	22	147	89	1628	330	428	426	46	1304	245	395	153	225	8	231	550	43	300	352	332	16	256	1152	34	279	70	6	85	163	339	89	5	285	337	529	250	141	53	45	22	2
1094	117	219	241	582	541	1167	35	47	34	170	107	1744	300	494	508	68	1320	242	403	164	261	8	259	546	38	368	415	356	21	338	1362	50	270	56	9	96	170	424	114	6	278	427	524	264	150	68	61	24	2
1101	125	189	203	610	552	1128	31	50	35	195	99	1661	346	481	440	42	1085	285	406	171	258	6	281	564	41	375	363	314	28	406	1180	51	252	58	10	106	190	383	141	2	246	354	547	244	146	46	61	16	3
1111	124	200	208	580	577	1176	46	57	39	172	108	1876	440	481	495	48	1282	283	420	186	245	12	322	516	44	362	424	277	38	490	1369	46	284	60	10	113	211	485	144	8	251	435	660	221	155	73	49	19	1
1146	128	179	176	567	497	1055	50	45	35	190	152	1897	441	441	425	25	1173	294	352	161	251	17	356	464	61	322	384	283	52	542	1333	60	216	59	7	147	226	515	148	7	211	486	622	225	138	66	38	19	1
927	150	163	172	499	434	1061	52	51	30	195	142	1762	468	432	424	39	1229	262	349	160	229	10	293	409	54	355	358	248	38	521	1168	43	213	68	13	131	198	524	139	11	219	442	598	251	126	61	61	19	0
824	124	185	189	465	371	1017	43	52	30	181	133	1746	506	437	395	37	1194	248	328	170	221	13	290	338	43	348	370	225	33	560	1361	55	205	82	15	125	187	557	145	8	193	521	543	244	142	51	51	14	5
817	140	211	170	418	410	1152	56	48	22	186	128	1695	407	480	448	44	1175	252	326	181	251	9	266	357	36	393	418	238	43	566	1208	53	228	74	9	146	175	546	148	10	185	470	532	252	147	85	52	16	2
852	147	205	153	438	395	1161	33	52	30	183	127	1567	503	453	475	50	1242	233	316	160	266	12	248	342	61	403	385	210	31	661	1140	50	224	71	9	128	166	547	140	6	146	534	459	270	162	84	58	30	1
861	169	216	153	463	434	1189	43	61	22	200	131	1601	446	480	446	31	1164	255	334	167	281	22	253	347	66	388	403	218	28	679	1160	44	236	66	8	120	187	589	184	11	172	577	478	261	155	84	63	26	1
880	169	219	169	472	407	1134	55	45	29	201	144	1566	407	500	434	39	1178	259	346	190	266	14	242	335	65	386	437	224	40	724	1124	47	229	66	10	138	189	551	166	4	165	540	563	276	123	93	78	29	2
915	184	218	153	443	470	1170	51	42	24	218	139	1611	447	493	453	67	1227	266	341	193	280	14	248	367	57	400	482	173	35	718	1166	50	218	77	17	124	203	574	154	6	159	554	626	283	160	98	62	37	3
946	192	216	131	489	395	1186	46	54	32	204	152	1502	500	470	486	72	1307	268	362	199	257	10	257	376	45	397	475	198	38	689	1082	35	246	80	13	129	197	574	139	12	171	535	564	291	142	98	59	25	2
936	166	199	141	441	442	1066	52	52	37	205	158	1512	468	422	431	24	1395	279	327	173	255	9	271	369	59	406	383	184	34	689	1179	46	238	80	9	132	198	576	162	10	172	579	529	263	153	82	57	29	2
932	178	177	140	462	423	1087	61	57	37	214	161	1434	450	424	412	72	1323	279	330	178	253	14	262	383	73	367	435	213	38	724	1102	45	246	60	10	124	201	554	181	11	164	490	643	267	156	97	52	33	4
994	189	218	142	456	462	1190	44	55	35	207	155	1498	489	426	494	71	1366	258	346	211	254	20	253	410	56	439	428	189	38	723	1246	56	276	76	13	135	189	621	173	9	152	504	624	269	178	106	54	23	4
1032	172	200	118	491	438	1203	39	60	34	227	154	1460	491	462	471	58	1456	280	340	197	282	8	292	411	54	418	452	172	37	735	1103	65	302	60	8	118	231	603	170	4	155	494	597	306	155	116	49	29	2
977	152	206	116	488	418	1180	29	63	27	201	156	1465	484	395	476	37	1490	255	317	208	263	7	275	410	45	401	435	174	44	713	1139	61	319	70	13	119	228	558	148	5	172	488	603	278	133	102	45	29	1
1024	167	197	152	498	427	1161	32	57	29	234	148	1489	393	400	476	67	1528	269	335	178	271	18	268	453	73	381	465	176	50	769	1015	57	290	85	6	151	224	528	179	6	164	550	554	307	159	82	39	39	2
1011	163	193	122	518	432	1156	22	61	21	228	159	1539	319	400	455	69	1441	309	337	170	266	16	262	480	55	377	412	178	59	765	1104	70	311	71	16	153	218	584	168	7	161	540	504	262	130	100	47	36	0
941	158	203	140	457	431	1103	22	62	30	204	140	1501	361	380	444	63	1545	249	333	173	241	14	280	412	74	385	441	199	36	742	1035	53	337	79	12	160	194	583	168	9	180	559	481	254	152	95	38	28	3
1016	199	169	170	511	454	1124	25	63	35	204	175	1461	360	384	436	81	1722	265	362	188	242	13	272	453	69	386	425	221	51	727	923	43	326	70	10	157	223	552	145	4	236	545	535	263	143	94	43	37	2
1026	169	206	156	531	425	1140	40	67	30	218	151	1591	438	398	459	85	1516	289	331	175	237	9	291	429	80	409	451	217	65	730	1056	45	292	69	10	165	220	551	146	7	171	618	516	259	162	95	38	18	0
962	148	169	157	470	457	1083	36	68	33	218	145	1523	532	409	414	66	1505	275	345	159	239	13	295	419	73	362	415	218	49	852	1016	51	291	65	7	165	223	661	158	1	177	644	535	261	135	86	52	24	1
984	181	169	147	516	460	1094	31	46	34	228	163	1508	426	415	428	81	1442	283	381	172	247	7	267	441	61	341	465	218	67	757	998	43	259	62	10	169	221	563	169	5	175	571	560	256	144	100	35	17	2
978	179	204	118	506	434	1143	33	46	28	211	148	1588	479	404	456	61	1449	259	348	171	238	3	260	439	72	414	441	159	47	753	975	43	277	54	4	152	238	554	153	9	177	584	575	279	121	91	53	23	1
949	147	197	124	490	441	1087	32	43	26	187	138	1493	356	404	458	89	1603	290	349	180	259	13	236	439	42	362	432	188	37	740	947	53	288	55	6	163	241	556	158	3	191	546	575	258	151	93	56	24	5
915	152	171	125	482	414	1031	27	46	24	184	139	1487	378	349	456	71	1560	269	354	185	225	11	280	402	46	337	414	181	46	709	885	42	275	41	8	158	218	519	162	5	190	552	501	275	131	79	50	20	1
825	171	166	150	426	407	1090	31	55	31	202	149	1526	445	387	424	81	1627	242	318	189	224	9	238	398	43	365	456	203	38	718	887	48	270	49	6	160	208	531	128	1	221	577	509	233	141	109	54	14	1
903	173	191	151	481	405	1101	26	44	26	207	138	1498	470	389	451	103	1392	273	339	180	225	4	257	405	38	383	451	171	28	717	908	42	239	43	1	164	212	530	117	3	174	596	577	265	134	89	54	12	3
902	159	197	127	468	415	1112	28	58	27	189	144	1400	388	393	479	105	1394	277	331	183	245	9	234	442	42	377	456	186	38	687	936	47	255	59	7	147	212	546	144	5	188	552	584	284	131	100	50	13	2
930	170	218	143	479	429	1127	24	48	29	188	120	1511	442	434	476	108	1556	286	342	189	248	8	250	439	51	373	488	196	55	670	881	47	286	38	4	167	238	531	122	7	193	576	556	291	137	106	62	13	0
884	190	178	131	448	426	1115	21	50	33	184	116	1470	466	418	441	111	1493	273	340	181	256	7	219	435	44	394	420	206	47	723	907	37	254	47	11	181	217	520	146	3	207	563	522	264	121	109	55	5	3
827	158	179	156	428	404	1078	30	58	34	176	135	1409	459	437	435	106	1560	247	333	166	269	9	217	409	46	376	406	224	52	698	897	60	265	53	6	159	209	501	135	9	193	524	580	277	111	114	42	8	0
910	147	188	133	478	431	1045	27	50	25	195	128	1549	531	385	449	152	1497	277	366	161	255	6	242	410	34	369	403	216	51	740	914	48	258	51	7	154	206	524	148	7	206	599	539	234	127	104	53	6	2
862	174	166	163	436	417	1105	22	56	32	184	133	1536	493	425	423	100	1552	246	342	192	225	5	233	411	44	368	431	216	47	711	881	51	262	56	10	153	199	555	160	5	214	619	511	242	111	113	64	9	2
899	160	193	146	475	416	1099	23	42	27	194	122	1497	409	433	454	87	1640	259	393	192	244	9	242	426	29	365	423	213	48	761	904	52	262	44	6	170	219	555	127	13	210	626	491	252	105	118	46	9	1
892	182	179	140	476	416	1166	23	58	36	182	119	1472	420	450	478	69	1442	274	372	208	272	5	257	427	40	389	449	218	41	701	776	42	235	45	2	164	210	539	144	5	179	608	427	250	122	128	52	9	3
895	187	189	168	474	402	1150	25	62	30	193	113	1518	441	428	485	73	1658	262	368	186	275	7	232	448	24	414	435	272	49	686	801	46	253	40	5	158	230	523	119	12	186	605	409	246	135	105	57	11	1
793	177	190	147	415	362	1135	34	53	30	155	137	1587	412	438	475	76	1635	251	351	163	258	6	248	379	30	375	459	203	47	745	820	42	211	45	0	134	234	563	158	5	194	622	475	248	130	107	51	8	2
768	160	186	161	390	390	1127	59	62	35	153	135	1627	440	422	486	65	1553	242	346	162	230	7	219	401	35	369	447	202	52	715	746	54	238	42	4	141	207	502	145	6	222	589	467	255	141	115	48	10	0
801	174	168	160	421	399	1076	59	51	36	177	99	1606	336	414	438	102	1616	244	367	164	231	8	207	393	55	353	437	244	51	752	740	31	239	43	7	127	170	546	172	4	228	650	455	255	109	111	59	7	0
918	156	181	175	462	459	1111	62	55	23	164	124	1676	306	438	464	178	1540	264	382	173	228	6	201	447	40	375	418	260	56	760	774	54	262	59	2	139	209	602	164	5	218	656	481	248	138	112	56	7	3
835	160	191	168	430	422	1126	73	61	20	183	117	1462	313	437	486	161	1401	228	376	159	250	5	218	374	32	379	412	232	56	719	667	46	241	54	5	127	211	525	147	5	235	611	395	276	103	106	55	3	2
778	156	192	171	451	374	1122	69	56	30	148	130	1747	440	421	489	103	1513	254	343	170	215	8	203	396	44	352	411	246	61	817	792	47	212	64	4	124	188	604	203	11	242	737	495	223	121	119	69	7	2
755	139	183	178	380	356	1074	69	59	35	178	115	1485	377	420	459	88	1615	257	322	153	209	10	224	394	29	322	424	243	56	699	748	52	246	48	2	151	189	556	160	9	238	682	437	243	117	112	55	6	0
785	173	175	178	402	393	1109	59	55	33	171	125	1568	332	435	493	82	1545	239	356	162	213	4	229	393	18	350	437	237	59	784	866	63	249	47	2	129	210	565	158	8	256	725	442	252	135	107	50	5	0
758	165	181	126	416	348	1070	48	47	26	163	104	1541	308	440	464	98	1568	216	362	132	194	2	201	371	18	322	435	216	48	717	807	55	220	49	2	127	169	521	139	6	226	692	439	227	99	109	54	2	1
746	160	184	135	387	376	1090	44	42	28	140	97	1476	293	410	482	111	1451	253	321	146	219	3	205	386	22	334	431	216	49	666	688	39	222	59	3	127	199	439	123	8	190	637	387	267	118	106	47	6	3
776	176	172	151	414	337	1098	36	50	19	154	130	1684	327	440	499	123	1433	259	320	163	218	5	214	357	38	320	433	235	58	756	799	40	224	51	3	137	189	533	153	7	212	684	407	264	121	113	44	6	1
704	158	165	150	376	362	1047	38	56	18	164	108	1697	368	382	475	154	1582	227	377	128	214	4	192	397	32	335	389	238	49	737	826	39	242	49	4	125	164	546	149	3	238	692	432	233	82	104	44	2	1
755	154	177	170	406	342	1032	30	43	30	168	106	1511	379	421	432	176	1459	231	347	166	180	2	214	382	29	338	391	257	65	750	769	38	238	47	6	114	180	517	166	11	229	651	467	236	106	113	35	4	1
880	153	170	148	466	394	1000	54	51	16	164	104	1553	385	390	472	168	1424	236	397	150	190	7	231	385	20	321	380	240	75	783	740	38	253	45	3	150	176	498	145	12	250	657	416	222	97	94	50	5	1
722	166	175	132	376	346	1050	32	44	26	152	124	1767	445	411	449	176	1318	227	348	150	201	8	199	373	31	319	416	204	60	837	871	40	251	39	4	126	179	649	190	7	206	790	508	233	92	101	37	6	3
629	150	186	159	357	279	1085	46	48	28	149	94	1496	362	412	461	154	1429	188	310	149	205	5	157	342	21	366	412	258	57	728	730	45	220	53	6	102	154	560	168	8	223	645	491	230	106	109	35	6	2
734	139	171	180	375	329	994	42	56	27	168	100	1552	382	352	470	101	1438	207	324	130	195	4	193	362	25	303	406	264	61	852	764	44	257	56	5	114	181	582	164	2	227	721	518	214	94	88	40	4	2
736	162	176	166	416	334	1026	33	51	26	139	127	1523	414	354	484	121	1584	246	348	131	183	8	206	397	21	309	437	248	65	819	783	39	224	43	4	122	204	584	149	14	238	779	477	224	97	100	34	8	1
795	137	194	142	438	383	983	31	42	25	172	120	1483	413	386	463	95	1499	223	402	130	200	5	209	397	18	289	412	241	46	809	712	45	241	46	6	135	169	579	142	13	238	730	479	201	105	82	44	8	3
715	161	179	173	422	324	971	35	42	24	171	113	1533	388	386	419	82	1415	230	341	126	162	2	219	375	12	316	392	239	67	847	775	48	228	32	3	114	171	676	153	5	221	771	449	212	98	81	42	2	2
792	149	150	156	428	388	957	30	39	25	171	111	1404	406	359	403	117	1288	224	363	116	159	7	212	424	15	296	368	235	62	734	642	32	225	31	4	117	179	534	146	5	214	703	449	208	88	80	39	2	1
749	159	163	159	422	342	970	33	43	21	189	106	1487	378	367	388	98	1401	238	339	136	161	5	204	390	18	314	354	253	78	772	706	43	230	32	10	137	154	533	152	7	236	741	480	188	100	79	34	5	3
732	158	170	187	395	337	984	21	53	14	169	104	1471	357	376	427	70	1384	245	327	112	200	2	211	396	17	305	398	270	70	814	741	48	229	35	2	92	173	566	124	9	220	768	456	186	70	101	40	2	1
682	145	173	195	363	333	944	39	41	23	146	115	1428	346	339	389	66	1368	218	331	124	161	3	188	374	14	278	396	275	61	774	635	41	184	34	6	97	146	506	118	13	266	680	407	196	87	86	40	2	3
801	156	160	195	413	382	914	36	50	22	157	98	1413	312	333	402	67	1403	234	328	118	160	11	192	375	18	265	389	282	55	700	662	37	195	29	5	86	150	484	110	14	223	682	402	186	87	88	40	7	5
762	139	179	169	435	347	923	43	40	18	136	84	1617	377	352	403	55	1453	219	363	114	162	4	191	410	24	302	359	279	69	788	725	39	230	38	7	90	164	473	118	9	249	757	459	167	81	82	33	3	1
715	165	163	183	368	332	910	44	43	21	150	86	1485	329	320	400	68	1397	241	301	122	180	7	188	398	24	283	410	260	74	705	715	29	229	28	1	102	156	438	115	9	257	714	440	166	85	92	31	2	2
751	173	147	210	415	333	918	22	48	11	140	103	1647	368	352	393	69	1299	223	329	121	171	4	201	391	30	290	366	282	41	795	705	40	239	40	4	111	144	463	125	12	238	756	520	181	82	86	38	5	1
750	171	152	166	386	383	927	25	42	17	144	99	1567	348	342	391	93	1373	249	302	111	170	4	215	414	44	271	373	261	59	746	662	45	276	43	5	94	144	458	106	13	259	765	507	191	68	79	35	9	4
754	147	148	201	430	345	860	22	42	15	133	114	1532	358	319	386	100	1377	233	315	106	161	4	182	411	25	297	358	268	60	769	731	40	227	37	10	103	159	449	107	10	217	768	517	180	76	72	26	5	2
664	153	157	213	371	317	906	26	31	28	143	86	1462	322	317	405	75	1427	213	295	115	156	0	179	389	27	271	371	253	61	817	746	39	221	39	4	89	155	384	99	10	212	804	469	154	75	99	49	2	2
734	157	148	200	406	331	833	32	42	21	143	86	1504	297	297	377	99	1256	232	301	97	160	6	202	408	33	252	364	274	52	749	690	50	251	40	6	106	144	416	102	7	224	756	504	176	78	79	36	5	3
644	123	162	212	366	312	857	42	42	12	114	82	1502	288	308	388	103	1235	202	274	110	141	8	195	353	13	244	374	293	50	766	722	41	237	49	3	99	123	436	100	4	230	739	480	176	72	75	36	4	0
729	143	157	189	391	370	881	33	35	18	108	90	1512	340	319	391	101	1282	229	327	114	133	8	208	418	16	267	367	281	66	765	692	49	227	41	1	105	143	402	111	13	230	752	485	167	70	107	49	3	0
696	133	161	188	420	312	874	21	39	19	97	74	1475	329	284	371	108	1234	201	321	88	143	3	190	377	23	244	357	272	65	776	733	45	243	47	5	94	135	407	111	16	213	755	455	186	64	87	33	3	1
766	140	164	177	429	357	887	26	42	12	82	77	1560	349	312	343	107	1357	228	333	95	138	3	185	421	30	270	363	264	49	819	774	37	201	43	6	90	178	418	104	12	201	806	456	188	73	85	33	1	1
782	127	155	194	477	346	844	25	51	21	108	69	1432	276	261	395	101	1258	223	353	68	128	6	196	400	30	239	339	231	54	724	706	42	185	23	4	104	135	393	90	8	194	703	509	180	56	105	36	2	1
796	146	160	195	452	405	844	26	44	23	116	66	1420	320	264	370	119	1312	228	352	69	158	2	191	416	32	254	337	286	68	780	764	50	198	39	4	95	155	368	95	13	194	741	469	160	68	103	42	4	3
748	152	133	173	407	346	929	20	46	18	144	80	1420	366	276	422	101	1324	200	344	75	125	4	214	395	21	289	364	293	63	716	742	51	226	29	3	94	130	409	106	8	255	712	464	157	70	120	43	2	2
782	131	145	173	407	377	860	25	32	16	99	79	1556	338	304	387	87	1246	215	334	78	136	5	186	400	33	236	377	277	58	774	793	51	176	36	9	95	147	456	111	13	188	761	457	173	62	122	41	6	2
862	116	158	202	448	422	823	37	44	27	129	76	1521	354	266	342	86	1286	208	375	58	159	1	203	400	31	231	370	286	56	709	841	51	227	59	3	86	127	480	130	9	253	728	521	160	60	112	33	4	2
789	138	148	223	433	350	877	28	43	20	127	70	1498	369	252	379	54	1319	212	341	87	111	1	182	400	38	280	334	268	65	715	850	57	197	38	3	69	135	392	97	12	278	729	504	165	67	106	26	2	5
632	137	137	183	369	306	883	21	43	23	109	79	1402	310	257	419	61	1248	206	320	75	110	0	179	355	19	265	364	266	57	742	723	61	223	38	4	89	135	391	107	12	207	746	430	160	74	127	34	4	1
726	160	141	206	410	354	850	24	41	25	95	79	1359	334	264	373	84	1294	203	327	69	128	3	186	378	32	263	335	263	60	737	817	56	226	40	5	105	129	378	116	9	259	702	440	143	60	144	45	1	3
626	127	124	202	391	294	865	14	38	16	105	66	1441	336	243	392	74	1314	183	307	65	114	4	179	356	27	246	331	256	62	698	803	57	239	32	5	91	101	411	107	6	270	734	426	149	48	144	46	1	3
643	133	121	190	334	350	851	17	40	27	101	77	1448	298	252	408	61	1290	183	293	76	115	2	159	358	29	243	330	253	55	710	856	42	268	30	6	70	106	443	103	11	305	754	446	162	53	151	40	4	2
711	126	148	162	389	350	877	20	42	21	107	62	1483	336	246	414	52	1201	185	343	90	135	4	196	367	23	255	352	232	66	670	879	51	225	45	7	85	131	392	122	5	263	760	472	151	70	148	35	9	1
672	121	124	179	377	328	755	15	49	11	109	90	1466	241	233	328	39	1279	192	316	68	102	1	178	363	27	236	321	225	66	687	838	53	220	42	4	77	124	452	103	10	278	770	412	153	51	114	31	2	4
697	128	148	169	355	341	835	16	34	29	118	64	1497	255	269	371	54	1354	188	309	92	115	4	166	386	14	235	381	267	50	698	800	50	248	40	1	89	113	377	101	6	305	669	413	167	58	117	33	4	1
679	103	166	138	373	321	800	16	28	20	90	68	1372	307	224	385	44	1207	183	293	80	124	6	175	360	14	236	350	223	49	714	826	59	242	52	6	65	111	390	96	7	290	715	438	147	54	124	36	2	0
722	139	138	184	396	330	798	13	47	16	95	63	1391	308	256	353	66	1208	169	324	71	123	4	185	345	16	238	358	249	53	735	841	49	227	44	4	67	105	450	104	6	283	653	463	149	50	123	25	4	1
671	129	116	180	361	342	836	15	50	25	116	65	1467	268	223	371	63	1203	191	316	74	110	3	166	378	20	207	409	240	56	670	840	38	256	49	3	100	112	429	106	11	285	652	489	154	59	147	29	2	2
622	121	149	179	350	290	818	23	49	18	93	74	1434	267	249	344	56	1099	174	287	69	115	9	189	310	23	228	347	219	45	700	867	49	270	40	7	68	107	397	111	9	249	662	483	165	58	116	30	2	5
736	124	155	189	389	359	827	22	60	23	87	68	1467	263	261	350	62	1249	181	326	79	128	6	139	385	19	223	379	254	51	752	886	57	243	28	4	66	92	392	101	11	251	680	482	171	68	121	26	0	3
649	116	146	180	352	315	816	24	52	22	112	69	1571	310	223	358	60	1143	180	318	67	108	2	163	359	14	234	350	281	63	735	957	42	258	42	4	59	97	390	87	10	269	745	506	157	54	134	27	0	2
588	119	148	158	315	289	746	17	45	21	95	65	1586	293	218	312	44	1137	161	310	71	100	5	135	343	26	243	334	234	52	731	921	36	227	41	3	66	101	375	129	12	246	769	478	153	68	124	27	2	1
657	111	137	160	360	349	819	22	46	23	118	58	1454	278	233	338	45	1140	206	279	66	124	2	149	359	29	242	328	210	52	717	873	43	253	56	5	64	99	357	108	10	246	681	477	147	46	104	39	3	0
585	130	133	193	342	328	823	12	48	21	105	59	1510	332	251	334	46	1149	176	320	68	107	3	139	358	25	220	379	264	54	650	907	45	279	46	3	60	113	359	117	15	247	717	458	171	50	118	40	4	2
656	118	141	179	366	317	766	30	44	18	107	57	1451	353	218	314	49	1196	177	298	53	119	3	149	387	25	214	351	245	55	656	849	40	268	54	6	61	114	320	111	14	260	705	476	156	58	110	21	3	3
655	115	106	183	357	336	805	14	49	19	100	63	1360	309	220	346	37	1119	178	309	62	102	1	156	363	21	214	362	221	59	593	741	30	271	66	3	74	112	306	111	6	237	685	459	174	57	124	27	1	1
661	94	127	185	360	307	792	19	38	16	106	57	1431	311	226	318	59	1140	150	291	73	96	7	145	326	24	216	354	230	52	676	788	36	235	60	4	63	108	351	99	16	253	716	478	150	62	124	30	3	2
719	111	110	185	370	359	763	16	44	16	109	81	1517	340	223	310	90	1058	195	302	68	90	7	134	376	22	215	340	247	53	660	892	35	218	57	3	73	125	346	94	13	239	728	550	162	57	102	30	3	1
799	110	128	165	411	369	824	24	41	18	89	65	1324	305	229	302	89	1126	171	320	69	114	5	115	373	20	217	380	225	36	643	759	36	233	52	3	65	113	302	76	12	277	640	522	157	53	131	34	3	0
673	115	107	168	375	317	794	23	27	17	82	63	1450	335	213	303	95	1130	190	271	57	105	3	137	353	16	213	364	210	43	680	802	29	228	50	5	88	96	323	94	8	260	650	485	154	52	108	37	4	1
787	112	118	144	409	401	751	23	35	16	80	62	1450	331	208	290	75	1108	189	350	65	85	3	144	357	19	186	330	221	30	702	754	34	228	58	1	81	117	280	95	18	259	678	477	152	47	112	30	0	3
650	112	121	173	365	327	741	25	52	22	87	59	1508	412	231	281	94	1248	165	294	63	117	4	126	343	27	205	352	232	38	685	848	47	244	56	7	78	107	323	87	13	303	690	518	159	51	104	25	0	0
689	120	126	161	358	367	770	27	34	13	104	61	1363	330	220	307	73	1165	181	300	80	107	1	130	346	24	218	329	214	30	680	836	44	220	48	1	56	117	336	102	11	272	649	548	148	52	73	24	6	2
635	112	140	159	362	337	801	21	42	13	101	65	1313	343	214	313	65	1096	155	304	68	108	1	131	329	19	239	350	217	38	651	794	46	206	45	5	82	110	303	81	11	319	659	521	164	48	105	31	4	3
681	116	134	151	379	340	900	21	41	11	86	47	1319	348	240	329	77	1241	148	304	75	108	4	139	325	22	230	387	224	34	636	843	51	206	49	4	66	103	333	96	9	286	661	510	142	53	94	32	2	3
559	123	109	177	323	289	753	17	39	15	95	51	1422	269	200	263	58	1023	162	252	54	125	4	112	292	23	219	325	260	45	594	791	40	193	35	3	54	91	277	73	9	284	677	475	150	48	79	26	4	2
662	110	106	158	387	307	729	16	25	9	104	61	1333	283	195	282	64	1082	152	292	61	97	1	133	336	15	218	329	206	38	643	798	44	214	39	4	45	100	274	83	6	281	622	471	131	48	109	18	4	0
680	95	104	176	349	345	808	19	29	14	109	62	1265	280	217	289	61	1073	168	291	71	91	3	138	328	18	204	361	255	40	574	745	56	217	42	5	62	99	286	71	11	262	646	425	162	52	135	25	1	0
584	89	121	168	345	276	796	19	36	19	95	62	1239	356	215	299	58	1115	159	254	69	121	0	117	303	19	205	326	243	35	635	814	33	201	44	4	55	89	288	77	12	243	684	447	136	49	93	32	4	1
623	107	114	137	335	307	731	12	27	14	94	64	1242	300	209	287	51	1040	177	258	70	125	2	128	320	21	209	356	198	30	570	925	41	194	36	4	65	86	330	73	13	234	700	526	157	43	94	29	2	1
611	103	112	166	328	315	737	18	40	15	117	69	1181	295	198	269	50	1123	169	262	52	81	1	141	290	20	219	336	231	41	564	821	38	183	41	4	66	103	298	77	8	241	650	487	149	40	89	20	2	1
631	127	110	178	352	297	814	20	41	16	98	62	1174	247	198	296	76	1130	181	274	60	99	1	133	309	17	223	357	235	39	532	806	37	221	38	5	77	85	288	74	11	278	649	462	136	55	88	22	3	1
632	104	140	139	327	304	758	27	31	18	86	72	1329	231	211	289	30	1056	170	279	62	116	3	132	308	20	239	349	221	48	566	734	55	204	42	5	55	92	290	65	14	238	612	427	135	38	76	28	2	0
595	121	116	169	310	303	843	25	35	14	110	58	1308	261	230	304	39	1131	144	300	59	112	4	134	313	25	222	366	221	43	550	701	39	202	33	0	61	105	240	70	14	266	643	440	146	56	102	31	3	2
633	107	92	143	382	265	822	21	38	16	81	75	1391	251	215	273	29	936	175	257	69	109	2	118	318	25	214	364	216	50	550	739	44	184	25	6	63	89	213	67	4	237	645	438	145	44	82	27	2	1
569	106	95	151	329	283	754	17	38	16	110	67	1241	209	209	259	37	1100	167	270	70	111	4	109	328	16	199	327	202	46	541	631	34	188	38	2	56	110	242	64	14	246	608	337	158	44	76	32	1	1
721	101	112	160	387	375	744	26	23	13	86	58	1190	208	217	269	26	1111	164	309	63	111	1	127	343	21	196	323	212	28	541	692	37	202	40	10	70	85	235	69	10	271	657	368	128	43	88	30	2	3
564	102	117	150	322	282	634	12	41	11	91	58	1460	207	197	227	21	926	163	269	57	102	2	123	331	35	194	295	210	43	536	704	38	192	39	3	53	113	246	58	10	255	608	467	129	40	81	15	2	2
599	103	122	160	340	291	790	16	36	15	87	71	1343	197	225	287	36	937	181	247	80	106	3	113	317	34	199	352	236	40	584	817	40	208	44	0	64	95	236	61	20	293	654	400	139	62	96	26	3	1
603	115	113	160	349	304	748	14	36	14	89	53	1275	196	205	285	40	955	146	294	62	100	4	105	320	23	197	332	200	35	517	703	43	204	34	1	53	101	215	53	11	261	609	434	153	36	101	22	4	0
627	105	125	153	353	328	811	21	38	9	91	64	1163	183	194	289	54	1034	158	254	49	109	9	98	299	22	220	329	226	44	476	744	37	179	20	0	56	76	221	80	9	230	609	429	162	51	72	23	3	0
646	115	103	149	335	324	809	28	44	14	100	56	1486	199	189	276	51	1034	166	268	54	114	6	108	317	30	195	372	195	37	607	804	37	197	42	4	55	98	262	79	12	326	687	456	170	48	90	26	2	0
625	112	116	168	359	310	766	30	33	14	109	55	1331	165	222	269	49	1089	179	266	68	111	2	122	313	20	208	349	223	41	569	803	31	200	43	1	63	105	269	78	10	302	632	493	169	38	98	20	4	3
631	124	133	199	347	288	776	19	44	12	85	62	1416	179	219	293	67	1091	168	245	78	124	6	116	302	23	213	353	253	38	622	837	43	200	48	1	55	82	253	74	11	289	650	491	152	56	79	28	1	1
668	104	115	179	332	318	786	17	33	18	96	72	1256	167	221	297	76	959	143	264	73	121	2	113	288	32	188	344	228	32	571	669	41	195	43	3	44	93	221	69	11	287	604	473	169	45	96	38	3	1
689	129	113	173	368	321	718	21	35	11	105	61	1246	157	209	253	45	1011	155	273	70	93	3	135	323	19	210	273	218	42	568	689	50	196	41	4	62	80	249	69	6	294	608	474	162	48	84	25	1	0
605	99	97	156	316	309	723	13	22	12	96	65	1198	174	204	296	54	1094	148	268	66	112	2	136	311	34	172	333	212	39	543	666	54	189	52	9	59	91	262	84	13	323	581	417	164	47	100	15	4	2
678	95	115	173	335	332	827	22	33	11	84	62	1327	203	198	293	49	988	175	244	64	116	4	130	314	21	192	364	201	28	544	741	65	200	39	3	58	102	243	59	9	288	649	426	172	46	89	27	1	1
621	97	118	165	326	327	814	23	26	19	86	57	1180	163	229	289	46	995	177	248	44	102	5	131	297	14	197	377	200	37	533	742	38	204	49	6	50	91	211	51	16	244	583	465	149	56	106	35	1	2
653	86	120	179	381	311	733	15	36	15	103	63	1218	156	192	265	37	979	160	276	59	97	3	121	318	29	193	330	220	34	584	693	55	189	46	4	51	84	197	56	11	259	602	413	159	51	92	24	2	1
660	98	101	179	373	326	729	20	34	21	79	50	1211	218	192	289	55	1044	156	275	62	120	2	102	321	24	194	338	224	44	571	705	39	187	37	4	46	77	194	53	5	288	610	377	141	43	95	23	4	1
610	86	129	151	343	304	669	18	31	12	70	48	1399	203	168	259	31	1027	149	250	56	107	4	98	303	24	186	275	214	28	656	834	43	189	42	6	50	87	233	56	11	296	657	449	137	47	92	18	2	2
649	110	107	155	335	337	756	12	29	21	40	44	1303	193	202	294	39	988	172	238	72	92	6	104	304	24	200	314	196	28	538	676	38	184	31	3	48	74	215	48	13	250	572	449	156	47	81	25	3	3
852	114	130	177	444	419	862	16	35	15	93	60	1315	194	228	344	34	1009	175	298	67	110	4	97	379	19	188	385	225	28	583	663	41	193	36	6	52	82	228	52	8	255	577	383	137	50	110	22	0	3
647	86	111	192	315	343	756	15	39	17	89	60	1161	145	198	274	36	1080	156	266	71	113	5	119	302	25	178	302	221	25	521	643	45	196	47	1	58	78	238	74	14	330	588	398	142	51	77	15	4	2
674	108	88	191	352	336	589	11	43	17	83	54	1284	174	169	221	26	1001	149	277	57	100	4	89	324	20	169	251	241	37	550	660	40	188	49	5	38	81	213	59	11	294	582	400	141	29	63	21	4	2
615	104	123	159	305	318	765	17	29	17	73	53	1184	180	207	270	23	1062	155	251	65	119	5	95	301	21	203	304	217	26	533	538	33	185	39	0	50	76	198	57	10	377	550	384	150	41	90	25	1	1
753	115	111	143	409	353	766	22	27	13	66	43	1273	176	208	281	27	1120	151	282	72	120	7	106	326	22	198	295	192	32	525	622	42	165	30	4	46	60	228	56	8	302	570	410	146	45	67	18	1	0
760	95	112	189	412	393	716	25	26	16	72	44	1306	135	209	251	15	1014	178	299	71	90	3	115	347	13	171	316	209	33	589	614	33	160	26	2	56	68	223	63	6	344	587	405	143	48	79	26	0	1
557	106	89	201	308	283	730	21	33	16	72	47	1340	162	178	256	28	1081	159	239	44	104	6	121	268	22	189	313	203	26	566	684	39	168	27	1	41	61	231	72	6	338	607	399	141	37	79	15	3	3
616	100	95	182	310	306	707	23	34	12	83	56	1383	163	193	255	20	1033	137	280	51	116	7	121	292	20	178	264	215	44	530	737	40	184	45	5	44	72	272	78	10	290	642	430	139	37	82	16	2	4
591	114	104	230	305	308	879	21	35	17	61	45	1361	167	202	325	45	1116	141	235	67	117	9	119	262	23	202	364	238	30	530	637	42	142	34	1	52	71	234	62	8	365	551	366	137	37	109	22	3	3
543	90	91	219	299	267	857	28	39	21	65	42	1378	176	196	277	37	1105	146	218	57	91	12	100	274	16	172	330	243	25	585	633	37	159	30	1	27	64	218	52	4	289	606	353	141	43	66	29	2	1
583	85	92	231	335	288	733	21	35	12	58	42	1238	139	182	269	57	1080	154	249	72	107	3	136	258	20	177	328	269	26	503	558	37	147	25	2	48	66	194	39	8	304	539	264	149	42	86	28	0	1
635	98	103	208	352	312	866	17	22	12	56	49	1038	151	214	307	39	1066	146	278	72	108	5	102	280	19	218	338	245	29	482	517	46	156	27	0	30	72	171	49	13	335	555	290	160	43	91	25	5	1
594	93	116	204	287	276	950	27	25	7	71	50	1188	141	217	290	41	1042	117	257	52	108	10	105	283	28	211	366	219	30	537	589	34	142	32	4	49	71	192	64	8	252	612	333	151	35	93	24	5	3
622	94	100	206	342	337	788	34	27	14	67	51	1112	158	183	267	60	1200	148	282	65	113	4	116	290	29	190	306	239	29	502	627	27	153	39	3	30	81	188	48	14	323	611	367	125	38	72	26	6	1
545	91	118	203	303	297	906	29	30	6	70	42	1190	137	200	313	35	1137	147	235	80	102	7	102	282	31	209	352	251	14	606	665	45	159	35	5	50	56	213	56	11	305	638	388	169	41	83	27	3	2
587	119	113	160	320	316	775	19	29	14	55	45	1148	111	188	259	32	1016	149	270	69	95	5	99	279	28	188	358	203	32	489	546	40	142	24	4	39	73	195	46	13	285	600	351	136	42	79	22	5	2
547	90	117	188	310	293	865	35	21	16	77	45	1174	137	199	290	50	1028	151	262	58	105	13	104	287	20	183	357	225	25	488	581	43	135	34	3	35	77	165	60	9	284	642	341	145	41	91	33	3	1
617	103	117	188	319	307	830	24	25	10	75	50	1238	130	220	265	57	1046	142	267	76	109	6	95	303	20	196	353	212	30	546	644	47	160	26	5	56	78	192	44	8	224	660	355	139	49	86	20	2	2
556	90	105	183	307	265	746	20	30	3	66	43	1130	114	169	240	40	1093	153	237	68	96	7	99	273	23	209	306	216	31	500	562	36	168	26	7	40	85	196	48	10	264	572	331	147	35	54	17	5	3
630	93	92	169	323	310	803	14	22	7	50	33	1210	120	178	262	36	998	157	254	57	100	9	103	268	17	182	289	206	28	464	659	33	170	25	8	36	74	181	50	6	272	631	394	147	43	98	18	3	3
600	95	106	206	310	324	893	25	30	11	55	42	1110	121	196	288	51	1047	143	261	52	105	13	112	287	12	205	362	235	34	502	579	26	171	41	2	38	56	184	41	11	270	583	404	153	36	105	32	9	2
636	84	125	160	340	316	875	19	18	16	53	46	1041	122	194	274	37	954	153	250	55	112	9	108	294	32	188	359	216	27	524	519	41	180	23	0	43	55	165	45	12	240	591	341	135	54	95	28	4	2
872	106	121	181	437	446	852	21	39	16	67	38	1089	138	201	269	34	948	178	300	57	103	10	97	317	28	208	355	225	23	534	558	34	151	33	3	33	68	166	45	12	258	542	369	146	49	92	28	3	1
550	95	111	177	291	285	793	20	24	16	79	43	1063	124	208	252	43	902	161	234	64	104	8	125	292	11	176	292	221	34	520	498	36	163	28	4	42	74	186	50	4	279	608	341	143	39	91	13	2	4
657	93	103	200	342	319	870	19	40	16	69	45	995	130	203	275	53	1044	163	249	61	96	10	88	269	29	198	337	224	23	511	548	27	145	36	4	44	62	214	52	5	245	556	360	136	44	95	26	5	4
662	91	113	187	312	351	853	18	30	21	65	49	924	139	191	307	50	1057	146	244	67	121	11	105	280	27	194	363	185	34	483	577	38	158	29	3	22	58	218	48	8	250	646	384	139	49	91	27	3	0
596	96	109	163	311	318	776	19	27	13	72	42	850	115	207	283	58	979	144	251	62	109	12	117	269	26	178	329	199	37	502	534	22	165	36	1	32	74	207	62	6	254	586	369	135	52	81	34	3	1
636	92	102	187	330	341	753	19	35	10	69	48	854	124	213	264	52	1069	143	259	71	103	10	110	283	11	179	334	244	25	531	514	30	136	17	4	30	54	225	47	10	252	566	374	147	50	78	20	3	0
601	79	112	164	314	316	882	26	27	9	75	52	919	104	206	317	69	1115	146	215	62	99	16	86	294	22	187	393	190	29	495	491	30	120	17	6	38	60	206	50	10	275	582	300	148	50	113	30	5	0
593	94	112	151	321	309	905	26	26	15	56	35	1035	115	196	299	64	958	139	228	68	103	12	59	254	17	186	341	193	28	559	641	31	137	21	8	31	68	230	46	5	237	642	357	145	45	95	29	7	1
640	88	125	219	298	365	842	30	40	11	59	35	1002	124	205	266	58	995	147	228	59	87	13	87	257	23	219	321	216	30	548	526	42	143	31	7	33	48	220	46	3	245	609	308	148	39	95	22	4	1
512	79	91	196	248	289	654	32	38	13	58	47	955	124	164	215	48	1011	122	230	58	71	6	92	246	16	154	246	182	26	505	573	33	154	39	4	42	45	210	53	6	308	604	328	130	55	64	27	8	3
556	105	118	217	269	320	989	29	38	9	72	39	904	113	205	264	47	973	142	227	74	101	15	87	272	16	217	393	252	45	472	521	41	134	33	5	44	53	201	54	7	268	598	323	155	38	104	23	8	1
581	95	115	212	323	278	866	29	33	12	67	60	876	139	218	258	43	1010	155	261	57	113	12	102	278	20	187	345	227	36	532	558	30	146	51	6	41	77	206	48	6	253	591	307	137	40	97	30	7	2
520	94	115	195	260	275	848	34	35	13	72	42	982	144	209	275	56	946	133	225	52	101	11	117	238	34	194	348	233	31	539	553	28	134	44	0	37	67	232	45	6	252	577	269	150	50	96	21	7	1
545	85	106	179	272	283	756	35	31	12	52	46	839	136	201	268	52	1119	152	205	60	94	14	89	267	23	204	278	200	27	529	513	37	154	30	8	32	70	212	57	12	327	600	246	126	47	94	28	3	2
518	87	101	174	272	280	808	35	30	17	59	37	935	132	194	287	50	968	121	240	53	93	9	86	234	22	166	309	194	29	497	619	26	143	33	3	30	42	238	52	4	301	603	288	135	51	104	30	4	2
581	92	92	180	284	302	941	18	36	18	61	45	794	127	222	283	41	912	134	255	47	81	6	108	280	13	210	347	210	39	505	489	31	159	30	2	50	66	210	52	8	288	547	257	138	51	112	28	4	3
611	89	124	178	301	320	790	26	34	10	80	48	872	111	190	249	73	1054	132	237	53	98	11	99	276	28	206	308	189	32	506	479	29	125	28	1	40	64	214	57	8	294	621	272	129	43	66	26	7	0
796	91	110	196	337	390	769	33	37	17	65	55	846	117	189	253	71	1042	145	258	64	87	5	103	278	25	177	329	215	31	500	590	41	162	36	5	25	71	205	47	8	273	604	291	132	36	97	29	5	3
879	99	91	176	399	454	794	30	39	15	73	41	872	128	208	286	67	1028	139	285	51	88	7	80	327	22	192	317	205	35	479	554	27	164	32	3	32	53	206	40	9	286	608	265	137	49	92	27	3	3
875	106	122	190	390	472	973	24	38	22	74	42	861	91	214	284	75	1065	146	273	58	101	9	84	330	14	207	368	217	24	451	511	36	160	37	4	32	51	189	50	8	289	569	241	128	51	93	38	8	2
806	101	96	176	352	378	880	32	31	16	78	57	939	121	202	302	76	1083	153	246	66	83	10	91	302	8	180	333	204	32	549	549	26	143	30	3	49	60	190	34	8	309	617	285	139	50	97	22	6	3
584	100	88	179	306	292	842	24	38	14	81	50	844	88	191	269	47	1060	125	246	50	99	11	93	267	16	189	308	214	36	494	546	37	159	22	2	38	56	172	42	5	302	613	280	133	36	89	22	9	1
634	95	98	189	374	317	890	29	40	10	65	29	915	102	210	272	32	969	151	235	63	88	10	103	263	14	215	306	225	26	502	540	30	156	29	2	34	46	171	37	9	308	562	289	124	48	95	34	5	1
715	83	95	154	346	371	819	39	31	16	67	54	870	102	201	264	43	984	149	271	59	94	11	100	268	11	189	321	192	30	494	455	21	139	27	3	28	67	168	47	6	317	565	277	142	39	85	25	2	0
701	98	118	170	337	349	988	32	42	17	85	59	942	121	221	320	47	985	164	248	69	106	9	98	262	25	218	370	199	32	500	518	38	129	22	8	36	64	183	39	6	300	594	297	137	60	102	23	4	1
642	98	112	170	333	344	835	37	45	21	79	53	1029	109	203	273	58	1005	128	260	57	112	14	102	270	17	217	322	207	36	498	539	38	124	30	6	34	40	162	37	7	311	610	289	137	39	74	30	6	0
596	91	95	196	299	291	681	30	43	14	73	47	1040	108	180	275	48	1009	141	237	65	86	17	97	263	18	202	266	231	46	479	477	36	132	25	10	41	55	159	37	7	287	559	298	142	54	75	17	9	1
662	95	99	176	334	336	847	32	44	17	73	40	1090	105	198	276	56	999	143	221	49	97	17	98	249	10	184	371	206	38	532	467	41	119	27	0	30	57	151	40	7	275	602	260	142	42	115	20	8	1
648	96	115	172	358	334	899	41	39	20	75	46	1051	102	227	293	48	1004	155	233	84	102	13	100	281	9	215	346	209	39	494	487	40	138	34	3	34	60	177	31	4	282	620	298	135	45	91	32	7	3
638	97	98	157	308	344	738	36	32	13	88	61	1099	127	197	241	69	992	156	240	62	96	17	107	286	14	197	303	194	37	481	467	45	156	40	4	42	61	145	30	9	294	612	305	128	42	70	21	6	4
784	123	111	149	369	392	852	37	25	15	88	46	1049	133	222	258	66	1045	162	264	68	102	15	91	262	13	194	333	185	37	526	435	40	150	32	6	44	69	156	33	8	272	596	260	143	51	82	21	5	2
760	89	117	158	363	409	900	37	29	13	73	55	933	136	225	284	78	1041	130	281	61	103	10	113	266	13	229	330	179	41	476	479	37	130	21	3	42	61	137	26	11	288	570	218	152	50	80	29	6	3
600	80	76	195	319	312	741	37	31	17	86	55	1093	132	201	255	65	966	146	246	59	93	14	109	272	20	174	313	201	38	502	484	31	135	27	1	44	86	157	38	12	297	624	269	133	42	105	22	6	1
765	110	104	145	396	395	812	31	36	17	70	42	791	110	211	271	58	948	155	235	79	114	8	89	286	16	235	311	191	33	508	481	45	106	28	5	53	64	159	30	10	267	618	288	114	58	84	27	10	3
861	81	115	167	409	430	887	40	41	15	82	50	1048	128	198	277	75	1026	155	286	67	97	10	102	278	10	208	348	203	34	446	555	35	112	22	3	44	62	161	36	4	292	652	261	136	47	72	26	8	0
813	95	90	181	351	417	731	33	45	16	80	51	974	110	175	253	49	993	150	292	57	92	14	101	263	16	175	274	185	29	549	503	39	140	24	3	35	85	180	46	9	326	657	256	125	49	84	23	9	2
571	93	106	156	263	300	831	46	49	21	78	67	888	94	224	268	48	938	115	252	65	109	14	98	260	12	215	306	181	33	515	487	41	119	25	9	48	62	172	44	2	298	592	233	148	44	84	25	7	1
573	114	113	165	325	285	943	39	37	15	80	44	876	105	251	277	66	981	118	242	72	104	17	119	237	14	193	367	192	43	487	506	33	123	17	4	35	58	186	37	9	293	615	256	141	48	81	28	8	1
577	86	118	162	256	301	888	30	40	18	70	53	915	73	190	317	72	929	143	218	68	112	17	98	267	17	211	323	189	37	506	536	44	113	26	4	37	63	191	43	5	233	657	280	144	46	83	25	4	1
541	94	120	172	287	268	940	31	46	25	68	46	900	92	232	270	90	928	114	223	59	108	21	111	241	15	176	378	203	30	541	560	35	124	27	2	29	64	168	38	2	260	630	269	140	51	88	25	4	1
904	82	126	169	411	431	902	34	31	18	69	47	964	130	233	289	91	951	168	298	65	102	28	89	257	10	199	366	174	21	521	502	30	124	14	1	41	68	147	30	6	278	592	254	152	51	79	32	2	2
728	81	100	168	296	355	775	23	34	14	92	62	882	103	211	251	102	916	148	301	61	97	23	88	290	5	164	310	206	31	465	468	30	118	14	2	43	76	160	27	6	302	511	278	129	39	102	22	9	1
544	99	115	148	273	283	797	39	34	18	72	59	819	71	207	281	81	891	134	238	69	119	22	93	267	20	202	304	191	29	445	460	33	134	14	11	40	64	149	35	14	269	574	245	122	57	91	37	5	1
607	87	98	166	291	335	864	34	37	15	83	64	888	117	199	280	86	873	145	238	65	111	12	89	273	21	202	333	194	39	502	521	33	118	22	8	48	64	126	35	10	228	610	265	120	54	100	26	9	2
483	101	101	150	267	270	1014	29	28	17	52	33	866	117	216	320	82	840	97	214	69	98	19	76	188	12	190	357	180	25	464	541	32	111	18	2	16	43	130	39	6	233	585	274	108	43	103	27	4	0
531	111	114	160	283	305	885	30	35	11	101	55	837	108	214	272	70	858	148	230	76	103	15	106	267	11	203	337	186	37	461	467	36	106	12	3	49	75	122	38	8	255	599	293	140	42	82	26	8	0
930	95	101	182	389	481	887	31	36	14	85	43	816	96	232	308	101	922	182	288	63	111	16	72	268	23	178	332	214	27	478	439	31	114	31	5	48	67	129	34	4	282	542	254	128	40	101	21	5	3
827	84	103	174	342	464	952	40	40	13	78	59	836	113	203	291	72	835	172	290	62	101	18	108	278	10	211	346	184	34	418	466	29	115	15	6	52	74	126	36	5	252	557	233	126	41	96	20	8	1
919	76	129	162	357	465	887	36	40	19	74	61	966	123	218	281	83	943	129	290	65	86	9	89	275	19	186	304	183	35	428	522	25	93	17	3	42	65	129	35	5	253	610	268	129	38	111	20	3	3
663	85	108	148	311	326	878	23	43	13	69	40	917	114	189	307	80	873	142	248	70	99	9	108	268	19	190	324	185	33	426	454	28	103	18	6	51	71	117	32	10	273	524	269	131	46	95	37	4	1
499	84	114	165	279	250	732	31	27	16	56	42	939	113	217	245	71	966	134	217	76	85	9	98	249	22	160	285	195	40	464	464	27	100	17	7	51	65	160	43	9	265	528	283	121	37	89	27	8	1
564	94	109	163	265	260	832	36	29	14	57	43	1018	91	179	281	70	880	110	213	72	103	6	77	232	21	205	305	165	16	439	516	35	102	13	5	39	56	154	36	4	279	554	275	125	50	65	23	12	1
706	72	96	159	336	329	889	36	32	19	72	45	1048	94	193	289	42	927	137	243	67	99	10	93	246	12	193	331	181	22	414	492	19	107	12	4	44	68	142	41	8	250	555	238	133	44	102	23	3	3
738	98	93	161	334	403	836	39	39	13	64	46	1011	100	203	267	73	951	143	257	63	104	14	73	265	24	196	309	179	29	444	484	29	112	14	5	37	64	146	38	9	274	554	256	132	45	84	34	6	0
788	90	82	158	336	376	923	36	35	18	63	53	917	91	225	265	105	843	137	273	56	88	11	86	273	34	180	305	172	19	438	443	22	121	23	1	38	52	165	44	9	269	543	242	128	32	112	28	10	1
588	78	121	165	292	253	791	34	36	19	75	38	925	115	190	285	114	807	127	248	62	97	9	102	220	19	199	290	186	26	453	495	27	126	22	3	39	52	143	39	6	224	618	220	121	49	88	26	7	1
849	90	84	173	359	415	895	31	34	11	81	37	906	112	182	285	126	851	175	264	63	84	16	95	261	24	187	357	187	30	446	564	24	120	15	7	44	66	152	41	6	257	574	229	136	57	94	28	10	1
914	75	93	166	342	445	845	38	32	22	85	46	960	73	198	266	87	925	171	272	57	92	15	83	268	34	174	324	169	35	464	456	28	118	23	5	36	66	155	40	5	263	527	247	143	32	87	37	9	0
823	70	87	163	320	389	807	36	33	15	81	54	940	110	186	262	107	896	162	272	61	90	25	107	280	31	170	328	218	39	421	483	27	136	20	5	43	75	149	33	5	284	591	215	113	31	110	26	15	1
375	76	96	145	172	209	915	30	30	12	69	42	806	100	218	305	120	950	128	172	46	100	14	99	196	36	188	284	180	31	439	423	29	119	19	9	32	56	151	37	3	279	574	222	133	44	104	29	9	2
477	93	100	182	211	221	920	37	48	17	45	36	806	78	200	287	109	790	111	175	58	109	22	68	196	23	202	340	210	27	402	466	30	122	17	8	23	47	171	42	9	247	555	211	113	42	85	33	12	1
622	84	98	169	284	286	799	31	23	12	59	49	931	92	183	276	120	793	137	227	71	94	6	82	245	24	165	304	192	22	431	416	34	106	21	10	35	79	167	43	6	238	566	191	116	39	98	25	4	1
695	81	77	177	315	341	806	45	41	23	92	38	1039	110	192	254	124	936	162	263	54	97	14	99	282	20	186	264	185	43	452	502	32	115	22	8	39	82	198	38	13	279	586	197	138	50	78	24	10	0
823	76	90	177	347	408	920	47	39	17	59	39	1047	114	191	283	100	940	150	245	55	94	14	70	271	34	172	325	207	29	476	521	32	119	27	4	33	58	179	46	6	296	587	232	123	35	81	34	10	1
669	64	100	160	325	284	685	41	33	18	66	57	1036	132	188	252	98	793	146	239	50	92	15	110	267	34	164	271	201	37	432	495	27	132	19	7	34	60	186	37	10	242	619	220	126	29	94	23	10	0
513	83	102	178	247	256	723	33	35	24	56	34	1062	126	202	218	83	829	140	208	62	117	18	75	271	39	160	276	190	27	413	523	17	127	14	5	51	44	164	41	3	261	564	196	108	41	72	29	13	1
781	77	103	145	311	360	804	54	29	10	60	31	1057	138	197	240	78	964	144	227	64	107	12	86	244	33	196	282	188	36	406	591	37	137	32	5	22	79	172	32	4	273	601	212	124	47	86	28	12	1
853	81	94	192	360	404	625	39	32	14	55	55	1082	118	165	202	80	890	165	257	72	91	13	105	273	27	165	236	200	30	424	550	24	119	19	4	36	61	173	46	3	265	609	239	107	57	65	14	10	2
782	100	100	196	355	364	792	39	31	23	75	35	1085	131	180	293	91	920	134	248	74	101	9	96	285	34	174	302	195	42	394	536	24	111	22	6	43	64	165	54	5	289	594	221	113	37	90	38	9	1
825	93	95	183	346	389	929	56	27	14	81	37	1164	128	195	300	95	947	139	245	74	107	14	85	274	40	168	364	215	31	405	580	17	123	17	9	32	49	165	41	2	263	641	233	131	41	104	24	6	0
549	70	117	190	271	237	700	39	38	19	49	40	1040	117	192	245	115	890	105	201	82	103	12	95	212	28	170	285	216	26	418	524	23	89	20	6	35	46	167	40	4	263	598	189	133	37	81	24	16	1
460	92	95	163	223	230	766	35	34	12	64	35	981	119	208	251	72	858	115	177	70	108	16	87	225	30	164	288	173	25	386	497	23	122	18	12	22	53	180	32	7	275	596	209	111	40	79	22	10	1
373	95	95	173	177	186	889	43	33	7	72	43	1102	118	200	302	71	948	102	156	81	96	19	75	203	33	201	320	202	34	430	519	31	111	15	13	32	56	173	48	11	262	592	234	127	48	104	29	13	0
642	68	99	179	300	297	925	48	31	12	57	48	1082	135	199	273	63	872	117	242	67	94	10	86	253	36	183	314	194	32	406	510	31	111	17	5	36	46	183	46	5	240	558	240	137	38	100	24	10	1
450	86	92	163	213	203	825	41	24	10	75	31	882	111	200	286	54	929	118	201	52	96	17	101	243	39	159	312	186	35	329	472	32	105	17	4	33	61	178	37	9	267	508	251	150	43	87	26	9	3
712	106	95	209	310	328	749	42	25	16	93	28	1007	125	227	244	53	903	124	246	66	79	9	83	276	47	182	286	178	27	379	504	33	106	22	7	35	57	210	64	7	261	543	239	108	53	88	26	10	1
763	76	108	184	351	370	726	48	21	15	63	23	915	114	196	250	46	961	130	235	62	87	15	63	265	34	167	261	170	29	413	488	32	110	18	3	30	44	201	46	7	278	514	239	118	44	102	16	5	1
642	86	99	204	302	276	753	44	31	15	65	42	830	99	192	251	46	870	123	220	55	83	12	105	281	25	166	297	197	34	422	471	35	115	22	5	31	47	212	62	7	258	521	239	126	41	81	24	6	2
491	69	108	151	234	249	882	48	24	12	64	40	884	91	214	274	41	939	134	176	58	82	5	107	239	39	177	299	153	35	363	430	28	117	25	3	32	51	208	60	7	271	537	285	139	34	94	26	14	3
823	74	107	166	372	415	793	41	37	10	45	20	949	118	216	272	42	870	144	223	71	81	10	61	259	45	183	296	177	27	366	460	28	109	23	6	18	49	205	50	6	241	541	250	141	44	100	22	12	2
603	80	103	176	295	292	877	39	30	11	54	40	931	116	224	275	40	839	113	222	64	96	15	103	272	25	184	365	188	35	363	487	29	92	20	5	29	56	212	44	7	242	567	226	138	59	121	20	9	1
754	61	100	170	303	383	819	43	37	15	61	35	931	89	197	280	37	852	154	205	64	84	7	88	273	24	166	299	173	25	317	488	26	77	17	6	33	51	208	57	6	208	537	230	115	47	109	22	8	1
824	98	92	158	368	392	783	45	34	18	71	44	963	137	212	240	33	800	149	228	77	104	10	97	300	24	179	266	152	17	367	515	30	102	19	8	19	51	213	49	5	243	522	279	140	49	86	34	9	0
697	84	98	202	311	347	786	40	21	17	54	39	872	119	202	265	31	966	117	224	82	91	11	100	268	35	184	287	180	33	337	484	27	112	18	2	31	65	185	59	7	264	467	243	136	40	94	29	10	2
553	91	91	180	249	284	768	40	34	20	54	37	1051	121	177	244	24	867	112	195	60	109	8	79	270	38	187	274	161	23	376	518	27	115	31	7	31	42	194	53	8	219	485	254	135	53	91	26	8	2
508	67	96	174	220	262	936	45	31	11	42	42	1086	109	223	297	33	872	138	175	66	103	12	100	214	32	169	341	196	29	324	511	17	123	16	8	30	54	180	51	7	226	491	237	140	60	133	25	11	0
809	97	113	173	351	402	931	51	34	17	52	35	1104	134	228	300	42	880	113	241	65	94	7	84	257	35	172	371	179	27	377	588	32	111	24	8	26	43	189	60	8	224	563	284	146	58	96	32	7	0
539	90	100	150	245	280	942	48	32	12	63	40	1016	134	202	346	50	907	129	190	72	82	12	101	265	34	197	330	166	33	399	546	23	101	14	6	29	47	204	55	5	233	561	228	144	50	115	26	5	0
816	83	107	153	367	418	844	40	37	13	48	39	1023	128	187	268	52	798	129	249	68	79	9	85	259	30	172	324	164	30	385	609	32	110	13	5	25	37	197	51	4	235	528	286	126	53	86	23	5	1
914	80	106	184	406	476	798	40	37	20	42	18	1050	111	190	290	68	823	156	252	74	88	12	76	303	38	181	283	181	16	363	515	33	93	12	8	18	43	200	54	4	229	501	260	154	44	92	35	6	2
890	78	103	175	440	490	999	44	33	17	45	23	1086	124	215	325	74	853	142	261	63	89	14	100	287	36	176	361	183	31	386	589	27	98	20	8	33	49	231	63	4	232	527	259	158	56	115	34	7	1
563	83	108	182	263	310	919	48	32	15	55	30	1124	147	210	303	27	765	143	208	55	100	6	107	253	45	176	375	199	27	400	583	18	100	17	11	39	45	186	48	7	227	542	265	155	63	107	23	8	0
563	81	113	163	310	283	693	38	43	16	55	39	981	130	186	247	21	691	111	234	69	106	12	86	210	32	186	260	193	33	326	533	38	111	19	10	28	47	180	63	6	212	484	220	145	58	65	35	5	1
541	96	133	181	238	269	806	44	35	12	62	32	1047	153	208	287	33	713	133	192	71	90	15	91	231	32	203	317	175	35	366	589	46	94	19	9	36	50	191	53	2	209	489	292	144	59	85	26	5	0
592	87	112	143	275	330	741	52	38	15	49	36	890	124	186	270	31	729	107	214	63	100	14	93	242	24	186	296	160	28	366	475	31	86	11	7	30	44	168	43	9	231	482	275	154	55	90	27	8	2
817	59	114	200	344	456	902	55	40	19	46	30	1080	144	215	310	42	723	133	249	70	106	17	84	265	35	179	354	201	32	390	600	36	108	20	5	33	50	185	37	5	243	549	266	146	40	120	38	7	0
686	77	95	210	311	376	796	39	38	19	56	56	1013	145	181	270	31	730	117	246	61	84	18	91	302	37	170	294	200	46	311	549	34	95	21	10	33	47	208	56	4	218	478	269	144	42	103	27	13	1
743	81	92	197	344	385	751	46	41	14	45	28	1035	116	195	249	26	661	121	233	60	68	10	85	287	31	178	314	171	25	303	521	26	111	16	7	27	53	178	42	2	236	467	244	141	65	93	30	8	3
540	73	87	187	256	268	993	57	38	19	64	46	1100	153	193	352	38	696	125	197	64	85	6	109	266	32	187	386	193	46	334	541	30	104	14	6	42	64	189	47	4	243	556	199	166	45	124	36	7	0
562	94	99	211	271	349	822	55	48	15	46	19	1074	128	214	260	30	738	113	203	67	84	18	86	235	39	195	302	195	24	324	532	30	113	19	9	24	45	188	35	6	214	505	238	149	64	79	32	12	0
575	84	121	185	263	290	949	51	47	22	42	39	1135	150	233	289	20	676	123	197	75	89	6	82	244	29	187	372	172	29	331	594	40	110	13	8	34	46	192	53	3	200	546	267	162	56	106	36	5	0
408	67	105	170	196	213	672	51	34	15	44	36	1012	121	176	242	19	693	122	163	73	89	13	79	220	36	174	293	197	31	275	475	27	117	22	7	33	44	179	50	10	214	473	258	124	60	79	31	6	1
512	64	90	188	250	270	991	56	52	17	47	37	1062	147	206	314	21	729	128	183	58	97	13	87	230	32	185	384	166	27	308	513	36	135	13	4	30	51	165	58	3	212	486	208	154	64	118	43	10	1
514	78	100	173	250	262	729	48	44	14	49	33	1107	132	194	274	20	700	129	208	72	96	17	103	240	33	188	310	174	34	336	501	33	134	15	5	32	58	198	49	4	214	536	195	146	52	104	33	10	1
738	87	106	193	344	370	911	57	39	20	43	27	1048	133	220	259	24	745	114	231	72	100	18	80	263	31	194	357	177	34	274	551	36	136	27	7	42	44	219	45	5	190	509	215	151	53	75	30	8	2
1078	92	77	167	546	606	878	58	32	16	32	16	1126	136	189	272	17	678	129	303	61	85	10	75	296	44	192	319	165	23	322	543	34	125	33	5	29	40	199	53	5	207	576	206	133	64	125	27	13	1
779	98	75	178	399	440	892	54	35	22	54	24	1170	152	215	285	20	697	150	249	60	80	14	102	306	33	199	341	185	39	290	573	28	137	18	3	37	50	203	65	8	221	491	216	147	41	124	38	9	1
582	86	103	185	317	323	760	49	36	21	48	31	1214	146	202	245	19	768	135	237	72	82	12	102	276	40	176	282	181	41	283	494	32	145	33	6	41	77	173	48	4	222	515	203	140	52	99	33	12	2
587	74	91	190	290	303	769	60	38	18	54	20	1296	168	194	296	35	749	125	204	63	91	13	87	278	38	176	293	170	38	311	588	21	170	30	6	37	48	192	45	6	221	538	231	123	56	99	25	14	0
763	102	111	188	421	389	764	57	36	17	43	27	1175	166	213	256	21	703	135	249	77	90	13	103	274	30	191	303	163	30	299	524	29	179	24	9	33	54	161	46	6	223	525	188	144	62	73	29	11	1
664	74	108	223	321	359	843	77	34	12	46	31	1170	167	211	287	32	781	142	249	74	91	10	118	254	21	184	318	170	51	324	514	21	146	35	8	47	67	183	46	6	200	526	176	133	46	100	40	8	1
535	72	101	198	273	288	767	75	39	15	36	22	1296	182	200	299	21	697	125	217	74	90	11	87	238	30	185	297	187	50	340	591	29	150	25	8	34	53	201	49	11	234	588	164	150	57	105	23	8	0
674	76	118	198	345	365	891	66	38	14	39	28	1227	165	206	289	38	685	138	257	63	82	8	96	259	31	171	335	167	39	360	542	27	154	23	8	37	53	218	46	4	225	548	200	165	60	105	26	10	3
652	98	100	192	341	331	793	80	44	25	41	25	1340	213	173	288	39	708	124	254	67	94	13	97	253	49	195	318	166	46	307	598	34	143	29	7	42	53	199	47	11	198	604	193	141	55	77	40	13	0
672	78	113	191	345	374	851	34	35	16	43	31	1221	150	198	306	28	713	137	272	72	85	8	111	249	35	182	348	177	48	330	495	24	141	23	8	35	64	171	46	10	228	543	195	145	69	118	26	10	0
987	93	99	188	507	543	939	31	26	15	46	20	1301	174	211	299	29	739	157	335	76	91	10	112	253	39	175	376	164	40	289	539	23	160	27	9	33	62	171	46	7	243	567	182	140	57	101	37	12	1
577	73	103	207	310	307	813	53	32	12	49	34	1300	131	195	275	24	701	148	261	86	84	12	108	230	42	179	360	188	57	290	530	25	148	35	2	44	58	188	48	2	205	597	191	129	48	96	31	7	0
562	86	97	198	304	292	691	57	42	15	44	30	1365	162	170	251	28	646	122	233	70	97	6	82	235	39	167	283	171	45	281	484	23	140	25	5	41	48	172	38	7	219	542	210	142	43	85	26	12	2
577	94	106	170	309	311	824	62	45	21	47	38	1248	143	168	292	37	788	155	244	65	87	5	111	201	41	193	291	178	42	302	499	23	153	31	5	45	52	168	42	5	223	565	218	139	51	96	39	8	2
610	78	109	190	299	323	971	62	27	12	52	24	1157	149	210	347	23	654	119	263	60	108	8	87	219	24	189	352	175	35	292	483	27	149	23	4	35	51	138	30	10	198	545	165	130	61	121	33	9	1
1006	84	95	180	487	520	755	57	41	12	45	23	1144	147	169	275	27	657	152	313	72	99	11	92	274	36	166	280	156	41	275	463	33	143	28	4	31	46	142	28	6	201	495	184	146	58	99	29	8	1
832	92	108	215	417	413	740	61	29	18	40	27	1332	184	191	295	35	722	138	292	64	115	13	73	250	45	189	293	171	38	322	603	31	154	24	10	32	46	160	35	7	192	606	244	151	71	117	27	8	0
542	82	103	157	275	317	799	60	27	13	51	42	1226	184	178	252	35	771	148	250	73	80	15	131	237	35	177	302	143	63	279	541	21	163	22	2	41	71	156	31	7	209	577	174	130	39	102	41	15	1
467	79	121	200	250	223	892	54	39	13	43	32	1086	145	228	329	26	750	119	200	62	84	5	99	208	34	179	377	171	50	278	455	27	132	24	2	34	63	115	45	3	203	545	214	136	57	133	29	15	1
643	74	95	195	339	363	830	49	41	16	35	31	1255	136	173	296	26	691	137	261	79	73	5	93	206	25	184	306	154	49	293	499	24	138	19	4	40	48	165	44	16	246	579	185	122	54	99	21	11	2
743	84	91	192	386	351	668	59	35	15	45	31	1288	186	195	258	25	636	144	273	67	104	15	102	250	43	152	273	181	43	302	481	30	130	30	10	37	61	142	28	5	216	531	203	116	53	80	32	5	2
1007	89	99	190	557	573	812	55	32	17	29	18	1224	174	228	274	21	666	172	368	83	104	9	100	232	37	172	314	168	33	291	525	43	146	17	3	38	43	158	49	16	212	527	220	128	64	89	36	14	1
602	81	115	206	322	296	814	48	48	15	36	35	1220	154	211	283	20	687	135	267	67	97	8	114	227	57	195	334	182	58	347	486	31	119	21	7	51	57	174	50	8	220	596	214	151	57	109	26	10	2
595	87	80	208	332	306	675	47	42	20	50	27	1293	180	180	257	22	620	155	248	89	93	6	109	225	55	205	280	143	59	331	598	28	130	23	7	51	55	200	61	16	184	663	218	129	61	94	31	13	2
820	97	120	214	431	474	898	34	34	17	35	20	1272	153	266	309	22	640	136	317	90	121	15	98	236	57	225	356	159	34	317	508	38	125	24	5	30	53	191	55	14	228	568	208	168	55	114	32	16	2
831	98	99	212	431	477	731	39	35	16	48	16	1236	152	192	281	18	742	156	314	75	87	18	98	224	48	189	324	164	57	306	460	30	144	34	3	41	57	182	43	9	249	580	159	147	53	102	27	20	1
974	80	96	212	482	559	719	40	21	22	51	24	1259	183	192	266	20	687	175	347	66	86	13	105	250	50	183	287	152	61	305	463	24	127	28	8	42	63	163	58	8	217	590	216	130	56	108	20	16	0
824	89	138	215	410	451	849	39	30	11	46	33	1238	167	205	295	21	675	167	271	81	117	12	114	235	44	179	356	161	55	311	460	26	129	31	8	37	66	180	48	12	235	540	198	144	55	114	31	14	0
732	74	128	218	373	382	971	58	30	21	32	28	1231	117	215	342	23	732	160	268	81	105	20	108	217	42	217	363	177	39	295	420	31	149	28	6	38	56	176	55	15	242	502	172	156	66	148	27	17	0
708	89	107	232	314	380	746	48	34	18	45	24	1345	168	200	299	16	584	157	266	87	94	13	114	227	38	186	330	169	57	263	468	30	127	22	8	40	58	151	55	13	205	552	195	151	66	102	19	12	0
838	82	113	200	414	451	712	54	34	22	42	26	1345	146	199	254	21	643	149	302	75	104	8	120	237	35	182	291	149	48	273	483	22	123	26	15	34	69	142	66	9	222	552	191	146	66	122	22	10	1
771	93	128	167	391	394	896	50	24	6	50	23	1346	172	220	346	34	680	164	274	88	108	7	129	212	24	218	368	156	65	330	517	37	143	25	8	44	69	158	38	10	219	599	188	186	70	114	29	16	2
597	79	99	203	300	297	753	52	31	14	42	27	1305	154	196	300	31	689	153	259	69	100	11	111	229	25	180	299	151	61	281	436	38	144	33	9	57	77	171	33	7	196	539	166	142	55	104	21	17	0
528	86	108	189	259	274	931	56	37	14	34	17	1249	155	221	287	30	746	122	216	68	106	5	101	199	33	195	416	164	59	225	435	34	166	20	11	39	55	121	47	10	196	563	161	142	54	126	27	6	1
441	96	97	220	201	224	834	55	31	17	46	27	1166	144	242	289	25	670	126	188	82	124	6	106	213	22	199	355	161	61	248	453	32	125	23	5	42	69	123	44	2	186	494	148	160	59	114	39	13	1
512	69	108	195	248	274	780	40	38	16	26	26	1153	150	193	304	41	687	134	205	81	91	5	100	184	27	189	319	159	69	216	481	34	136	29	7	37	54	125	39	6	218	572	194	143	52	113	26	13	0
479	83	109	197	228	227	839	50	47	14	53	28	1164	133	225	284	29	713	122	197	74	117	4	134	186	25	195	401	167	71	250	430	46	148	28	7	55	60	120	41	8	219	499	163	144	56	128	29	12	3
1065	75	116	206	558	581	742	51	37	11	25	12	1099	141	187	274	32	684	156	361	86	117	6	82	205	28	170	304	162	44	304	415	40	151	19	2	36	64	110	32	11	212	488	170	136	47	110	27	10	0
1023	81	104	202	506	557	936	53	35	12	33	14	1225	126	197	300	20	759	166	317	60	123	7	109	234	35	214	363	154	43	226	447	35	155	24	6	42	50	133	49	8	190	518	181	156	52	117	32	7	0
797	87	115	203	383	412	898	44	27	26	39	27	1151	147	216	301	37	696	146	283	82	119	14	123	230	31	231	399	160	69	306	403	44	165	21	12	67	77	132	34	11	186	528	177	146	59	103	31	10	2
870	94	107	226	415	465	793	47	37	15	29	19	1314	172	203	269	45	687	149	288	97	119	4	120	216	18	203	314	164	61	293	486	36	143	21	9	49	65	121	52	7	205	527	225	148	57	100	33	13	0
870	80	103	178	426	433	758	56	42	25	29	20	1200	153	199	277	28	712	174	270	81	100	8	117	243	19	169	338	149	44	316	468	49	164	27	7	41	90	123	33	12	212	521	169	151	58	100	28	10	0
652	69	100	217	305	335	781	53	49	16	38	23	1252	126	195	289	27	615	139	253	74	96	6	130	238	26	180	342	156	62	294	372	37	145	35	8	46	76	119	32	17	167	468	138	142	74	74	25	10	3
808	91	115	216	362	443	916	52	42	18	26	11	1316	157	223	315	43	771	150	280	82	109	3	122	222	33	226	397	173	62	306	459	41	171	36	7	58	65	111	47	14	210	534	198	166	61	113	27	5	0
752	74	112	196	354	356	720	46	41	22	33	23	998	138	216	275	36	651	142	268	90	106	3	137	199	28	199	333	156	46	223	318	49	144	29	7	43	67	94	36	9	173	388	152	161	71	112	33	12	0
512	97	79	204	247	247	812	43	40	17	39	17	1189	131	223	271	27	628	131	219	83	99	7	114	213	34	202	352	142	74	284	375	38	124	39	12	56	69	87	39	16	188	428	169	164	51	96	27	6	2
590	79	117	179	269	304	895	45	34	18	53	23	1271	118	210	275	26	610	120	252	81	115	10	122	234	37	215	408	145	78	245	383	31	155	27	6	56	70	111	35	13	203	432	151	191	55	88	29	10	2
549	73	98	196	282	287	822	42	37	16	33	21	1334	161	187	258	42	664	130	224	78	96	5	119	197	38	189	380	155	72	255	441	41	148	32	6	42	84	106	42	13	219	489	182	151	44	105	23	7	0
826	82	137	205	401	486	726	43	38	14	36	13	1199	126	217	274	31	653	141	307	85	118	6	129	202	22	197	314	155	56	286	353	47	149	35	11	42	83	79	25	16	213	408	139	167	70	80	22	11	0
926	100	115	244	421	482	744	34	34	15	22	18	1224	145	192	275	33	609	140	285	80	97	7	115	231	36	225	299	145	50	257	410	40	136	31	6	42	75	80	33	6	186	439	152	119	58	90	30	9	2
607	76	119	202	293	309	954	46	41	18	38	25	1401	163	208	306	27	701	137	247	82	100	4	127	222	36	212	389	150	62	267	445	29	158	35	5	62	82	102	24	11	196	485	187	166	70	106	20	12	1
549	92	109	190	263	294	748	32	38	22	34	22	1423	148	192	270	22	677	131	218	82	99	3	118	221	37	204	351	159	55	243	435	45	159	33	3	52	73	106	40	14	198	457	190	153	73	73	24	15	4
587	90	132	209	307	268	872	31	39	13	30	19	1562	171	214	286	34	759	121	196	76	123	2	104	212	22	242	403	151	51	279	470	48	153	23	3	46	62	113	35	16	205	525	205	157	58	96	31	11	2
570	78	119	180	290	293	788	34	32	12	30	17	1364	157	218	266	28	728	103	223	75	102	4	110	194	21	210	349	130	51	207	342	38	162	23	4	46	72	106	22	7	200	439	176	157	60	83	31	13	2
948	66	124	217	452	539	899	46	40	15	34	15	1009	122	185	296	30	733	145	308	68	111	3	122	266	20	211	416	149	56	196	330	40	167	28	3	51	68	75	30	5	199	382	158	160	64	89	29	11	4
1113	97	110	232	587	594	784	36	34	18	19	13	1123	133	183	277	46	794	161	322	69	105	9	137	240	28	189	397	140	32	193	306	41	152	32	9	41	65	75	31	7	207	423	158	156	58	93	30	8	1
1034	91	111	212	485	548	767	38	31	13	33	17	922	91	228	260	32	702	149	290	63	101	5	146	259	11	195	386	150	46	167	261	40	136	15	6	54	72	81	25	4	174	361	130	180	55	78	27	11	4
846	79	129	236	405	452	706	40	32	17	35	24	1060	107	203	262	38	747	135	272	73	124	6	126	246	17	193	332	150	66	207	264	32	160	36	2	55	67	74	31	3	209	386	148	152	62	77	34	12	1
676	76	143	233	303	326	980	40	23	14	29	30	1092	112	236	350	45	792	139	215	80	107	9	138	222	20	234	415	142	69	231	336	23	175	29	5	63	91	69	24	6	211	451	161	168	61	103	28	9	2
592	57	97	235	290	278	760	34	31	8	30	32	1435	169	200	261	58	803	137	230	58	89	4	130	198	21	191	383	135	62	241	492	36	184	33	0	48	74	80	31	8	239	531	208	157	51	104	25	17	1
751	62	118	205	370	360	622	26	28	14	28	14	1272	154	183	211	37	747	148	251	62	104	9	106	233	17	192	321	150	54	208	379	42	166	36	4	39	55	77	18	8	223	410	166	144	56	77	21	18	0
523	85	124	213	247	281	716	30	30	15	32	16	1027	110	195	272	29	737	124	181	82	111	6	108	200	9	205	319	148	45	212	316	44	166	33	4	63	48	83	27	5	208	394	153	197	51	91	31	8	0
632	82	141	199	319	282	849	31	31	8	36	12	1073	116	219	277	30	680	131	238	71	91	5	104	234	20	214	415	150	52	179	326	45	153	30	5	49	66	72	26	7	209	389	167	176	65	96	24	9	1
475	80	104	178	241	247	732	31	28	14	27	24	873	116	186	244	27	824	109	196	81	86	4	118	187	17	170	342	139	52	154	268	41	165	31	4	54	57	69	26	8	240	334	145	143	67	81	27	10	3
637	70	120	199	333	297	716	29	31	16	47	21	896	124	201	245	27	749	128	240	67	106	11	106	229	17	167	342	151	65	153	214	43	158	26	3	52	71	56	28	7	221	354	153	154	45	94	33	9	0
992	56	93	206	507	527	665	39	37	15	20	15	1385	191	213	227	17	773	154	296	76	81	1	101	233	11	171	309	150	31	219	455	49	157	28	5	44	70	78	15	8	236	482	207	146	53	75	39	11	2
711	78	109	274	370	369	661	39	32	16	29	12	1147	141	211	216	22	827	120	240	65	107	5	125	212	17	178	320	135	54	206	370	37	155	21	5	41	74	67	19	9	210	427	187	157	71	86	29	14	2
669	88	114	231	352	348	842	37	32	17	33	22	1162	123	206	251	24	796	123	258	61	100	5	116	231	14	187	378	147	45	158	333	41	137	27	5	63	72	64	16	7	210	402	167	170	56	108	27	19	1
554	73	130	199	274	282	735	31	31	11	37	19	1024	122	199	251	23	765	133	183	77	96	4	90	205	10	195	330	141	43	217	295	38	131	29	3	51	61	53	17	7	201	390	161	174	58	78	33	10	0
568	104	102	230	298	259	650	27	32	17	21	19	1056	119	182	233	26	745	124	176	67	97	3	92	202	14	184	319	138	41	210	274	35	128	26	3	41	58	50	16	14	189	390	157	159	55	76	27	16	1
745	73	127	210	411	393	709	31	31	13	27	13	1022	124	204	261	34	765	117	264	71	105	9	98	198	14	204	319	139	38	172	292	43	154	33	3	40	69	54	17	10	210	370	129	171	67	89	35	16	0
588	75	114	212	291	273	659	37	34	17	32	21	1066	118	165	264	38	753	128	211	78	100	5	99	223	6	166	295	150	55	194	265	35	155	26	2	60	86	44	19	7	198	374	143	153	57	70	31	18	2
529	73	145	204	270	246	821	38	28	15	28	16	937	129	208	303	24	687	123	215	64	88	7	109	237	12	195	386	135	50	169	270	36	169	44	0	51	74	62	20	5	185	371	159	171	61	118	34	22	0
539	87	116	214	305	261	761	42	40	14	22	7	1308	158	211	255	35	773	113	220	66	111	6	80	211	14	179	336	162	28	167	379	38	175	42	2	43	65	62	31	21	212	465	158	150	68	66	36	19	0
774	82	111	184	390	390	832	35	26	12	26	9	1169	149	206	267	32	682	147	257	62	96	11	99	217	20	200	358	131	29	221	370	47	131	35	7	39	69	40	19	6	180	435	167	151	42	109	29	19	2
762	60	96	213	346	418	703	31	30	15	30	15	1015	136	191	273	26	714	176	237	59	94	15	118	229	16	160	323	138	44	145	306	29	145	30	13	54	71	54	16	6	215	396	140	161	45	92	38	20	2
626	86	109	200	328	315	691	40	35	12	23	26	850	128	183	262	31	708	155	223	64	96	13	109	226	15	185	294	157	44	128	223	47	148	31	4	60	67	43	15	4	187	344	143	145	60	81	38	18	0
473	84	114	206	234	230	797	35	26	17	17	18	1026	146	154	278	30	746	113	197	69	91	17	106	189	8	175	364	129	43	143	275	35	135	36	0	43	69	75	12	11	224	442	144	164	49	88	21	21	0
562	79	117	159	279	253	748	38	24	13	25	17	1163	151	203	257	31	710	142	177	63	107	6	85	195	18	175	331	126	36	150	295	47	148	32	4	49	52	57	16	12	199	454	159	167	60	103	41	21	1
478	77	102	171	252	230	670	35	33	20	25	11	1315	152	174	236	21	642	122	180	59	85	6	100	174	15	183	299	121	33	161	391	27	164	30	5	47	70	67	20	8	187	466	153	143	44	76	26	13	2
542	71	111	256	289	263	885	43	32	21	26	12	1197	168	212	294	23	711	131	210	75	100	9	83	214	13	215	382	173	39	142	294	39	153	42	4	41	65	49	9	11	170	421	138	182	73	111	33	14	0
577	77	117	154	298	278	904	44	27	17	35	17	1182	138	199	278	24	737	135	226	59	100	6	112	222	21	186	405	141	46	130	328	44	157	48	5	72	59	50	22	15	196	418	158	163	56	99	43	15	0
460	87	108	234	241	224	703	28	28	21	23	13	1195	158	174	253	29	713	106	207	80	81	9	108	194	9	162	326	169	41	135	298	46	172	34	4	47	58	42	12	11	220	396	148	163	62	81	26	16	1
524	72	118	233	270	225	772	27	39	19	28	16	910	140	212	266	34	719	105	209	83	86	9	99	195	13	199	344	141	33	131	260	39	174	36	3	56	64	38	18	11	177	379	156	187	61	92	35	19	1
749	74	108	240	404	385	772	35	30	18	20	17	1229	160	182	240	15	720	135	243	58	92	7	93	218	15	182	353	156	32	146	384	39	161	38	4	50	57	46	25	10	185	460	171	162	62	93	36	23	0
753	71	106	253	377	377	665	32	44	19	28	10	1226	173	188	269	15	701	141	238	69	82	12	113	237	3	183	298	159	36	157	368	38	168	46	9	70	58	56	20	8	174	464	190	149	62	99	32	22	0
575	73	100	194	270	284	687	33	31	12	27	18	1254	177	189	230	15	769	117	212	65	83	7	134	193	5	148	330	132	44	146	407	34	197	45	4	74	70	60	18	4	203	476	186	154	50	74	18	25	1
526	59	103	193	258	261	689	35	48	13	28	20	1003	148	156	264	22	690	102	197	58	90	8	88	197	7	162	328	143	40	144	263	29	181	40	3	51	65	47	16	10	180	390	155	144	48	88	39	19	0
465	92	107	249	247	209	680	41	42	17	24	24	1217	156	187	223	24	722	86	180	82	88	15	92	186	8	175	308	141	26	132	362	32	179	34	4	47	52	48	15	12	195	438	184	136	60	90	27	24	1
479	75	105	194	261	204	666	33	30	22	27	20	1165	137	174	214	33	815	118	160	63	93	8	104	178	7	187	300	139	49	114	263	35	186	35	2	42	59	41	17	12	209	375	168	147	49	80	34	15	1
477	94	118	217	256	209	738	31	37	12	22	19	1341	155	188	251	18	775	106	184	66	102	5	97	179	3	206	310	144	35	143	291	35	180	35	4	38	57	48	13	9	198	428	150	165	45	110	26	25	1
514	73	106	181	269	259	764	41	37	9	29	18	1357	176	154	269	16	694	117	206	70	79	12	91	209	3	190	363	137	48	99	295	36	165	32	3	68	69	61	21	9	169	420	146	162	51	76	42	20	2
[truncated: 40 more columns]

## Sheet: KO PTX rep 4
C1112	B2112	C2111	A3111	C3111	C3112	C4111	C4112	C1211	C1212	A2211	A2212	B3211	C3212	A4211	A4212	A2312	C2311	C2312	C3311	C3312	C4311	C4312	B2411	C2411	A3411	A3412	C4411	C2122	B3122	A4121	C2221	C2222	B3221	B3222	A4222	C4221	C4222	C1321	A2321	A2322	B3321	B3322	C3321	C3322	C2421	C2422	B2131	A4131	B2231
0	73	541	9	19	53	115	269	9	9	4	3	128	1	0	5	6	5	15	21	14	99	22	1	312	283	101	100	1	83	0	2	0	50	13	1	203	74	12	33	33	0	2	43	38	3	7	2	2	1
1	47	248	11	69	209	88	200	4	11	1	3	26	8	0	0	18	5	4	78	57	83	32	2	125	225	78	81	0	22	0	0	1	16	7	0	174	82	16	56	88	1	0	96	137	2	5	0	2	0
0	76	424	12	35	82	100	167	6	6	2	3	161	0	0	1	9	6	6	38	22	74	31	1	254	235	54	74	0	121	0	0	1	81	17	0	141	90	10	35	53	4	3	59	56	4	7	2	1	1
0	73	314	10	45	101	90	206	2	3	0	2	137	3	0	1	9	8	7	48	29	76	31	2	170	184	53	85	1	124	0	1	2	90	16	0	145	65	5	31	65	3	4	96	105	1	4	0	0	0
3	80	256	6	68	169	72	270	3	17	2	2	71	7	0	0	15	7	6	64	51	121	18	1	136	293	91	97	0	43	0	0	0	24	5	0	193	71	11	38	44	0	0	116	125	3	5	4	2	0
1	86	523	8	90	216	81	190	7	9	1	0	62	6	0	1	15	8	6	96	61	78	27	0	264	293	98	81	1	43	1	2	0	37	11	0	154	74	20	38	39	0	0	147	144	1	4	0	2	0
1	81	320	17	46	135	103	212	9	26	3	4	250	3	0	0	10	4	8	43	50	98	14	2	183	163	56	83	0	185	0	1	0	135	36	0	156	77	20	41	64	4	5	96	107	4	3	0	0	0
0	78	468	7	34	97	79	196	5	15	2	1	123	2	0	0	7	5	2	31	37	95	23	0	273	135	48	74	0	88	1	1	0	69	17	0	173	62	16	35	48	5	0	62	91	2	6	3	0	0
0	53	388	11	47	144	66	170	2	12	1	2	123	5	0	1	8	8	8	58	40	77	16	2	186	141	47	71	0	117	0	1	0	70	14	0	141	69	7	42	37	3	5	82	98	4	4	2	3	1
3	95	592	10	29	94	84	136	8	11	2	1	93	3	7	9	14	16	6	31	31	62	14	6	277	107	34	72	0	52	1	0	2	51	11	0	128	54	14	32	46	1	2	43	73	3	5	0	12	0
1	117	480	8	31	96	66	134	3	9	3	4	139	2	1	0	14	12	8	41	31	60	16	0	293	159	27	60	0	86	0	1	0	79	23	0	126	51	11	25	47	3	3	68	92	7	3	0	0	1
0	95	481	8	23	56	96	213	6	6	1	7	25	2	0	1	6	5	3	24	17	90	23	0	295	217	40	99	0	11	0	2	1	19	4	0	190	81	11	24	37	0	0	47	47	4	3	1	2	0
1	79	411	10	23	84	61	111	2	1	1	3	159	0	1	0	15	7	5	34	33	46	8	0	236	143	37	43	0	109	0	1	0	71	20	0	79	41	2	34	52	2	4	63	61	7	4	1	2	0
2	92	428	18	50	114	40	108	5	12	2	0	64	2	2	3	11	3	5	45	44	49	19	1	208	167	60	54	0	31	2	1	1	30	11	0	126	43	22	45	43	0	1	112	82	1	5	1	9	0
0	112	433	17	100	266	57	93	6	6	0	1	257	4	4	4	11	9	8	71	59	47	8	2	205	86	33	47	0	195	1	1	2	159	38	0	82	51	15	47	39	7	5	131	127	2	1	1	4	1
0	75	483	7	104	224	148	291	0	5	3	3	176	0	0	1	17	5	7	48	45	138	23	1	260	186	55	111	1	120	0	0	2	105	21	0	187	96	1	32	43	6	4	111	111	3	4	0	0	0
4	93	419	9	34	96	116	244	4	9	4	0	262	2	0	0	8	1	9	44	38	102	23	1	232	82	18	99	0	182	0	2	0	166	46	0	197	91	13	26	42	5	6	69	69	5	4	1	0	0
1	128	379	5	31	114	115	209	9	14	0	3	80	3	4	1	10	8	6	36	27	89	23	0	219	83	43	90	2	52	1	1	1	52	11	1	178	87	16	46	58	0	1	52	78	3	3	2	6	2
0	115	337	2	71	135	101	175	4	11	2	3	109	3	0	2	4	6	9	52	53	83	24	0	216	235	54	85	0	87	0	1	0	63	16	0	139	82	12	42	36	2	5	121	129	4	7	1	1	0
0	54	478	4	24	66	83	157	9	7	1	2	223	2	2	2	15	3	7	29	29	66	22	1	258	140	8	75	1	164	0	1	1	121	35	1	118	67	12	41	55	11	7	89	70	3	4	1	6	1
0	138	462	7	45	112	94	178	1	5	0	1	61	3	1	0	13	7	8	52	35	98	19	0	285	34	10	98	1	48	0	1	0	42	15	0	176	71	7	34	45	1	1	62	96	2	4	0	1	0
0	68	395	10	18	60	80	180	2	1	1	3	217	1	0	0	10	9	11	22	21	86	30	1	225	140	29	84	1	164	0	1	3	115	44	0	168	80	2	40	43	6	7	41	50	2	2	0	1	0
1	89	331	8	58	150	66	134	5	19	2	1	70	2	0	0	16	6	7	57	35	64	15	0	203	96	21	51	1	49	0	1	2	40	17	0	111	53	7	42	56	1	1	97	102	7	6	1	0	0
0	108	427	7	40	79	44	140	0	11	0	3	285	2	0	0	19	6	10	35	34	66	14	1	224	109	26	63	1	180	0	0	1	150	38	0	128	52	4	54	70	12	7	65	64	4	5	2	0	0
4	84	576	9	7	38	55	121	1	9	1	3	177	2	0	1	8	6	9	11	11	66	17	1	334	102	18	47	1	120	0	1	2	93	29	0	107	58	14	48	62	6	1	21	23	5	3	2	0	1
1	91	507	10	44	120	38	73	7	10	0	4	76	2	4	2	24	8	19	47	35	36	8	2	305	179	50	42	1	56	0	1	2	46	16	2	63	28	12	65	55	0	3	90	97	5	3	1	6	0
0	87	463	9	72	185	83	183	2	2	0	1	296	3	2	2	23	8	8	67	55	86	19	2	278	118	34	95	1	215	0	1	0	159	40	1	139	93	2	60	64	7	5	136	147	6	2	2	7	0
1	104	365	6	48	100	133	190	2	10	4	2	103	6	0	0	12	7	7	40	40	113	32	0	251	46	16	111	0	91	0	0	5	67	15	0	218	92	3	50	67	5	2	64	106	3	5	1	0	0
2	110	525	7	33	92	75	154	6	11	0	3	125	6	0	0	33	5	14	42	34	84	23	3	301	100	18	71	1	66	1	1	2	65	13	1	144	51	11	54	75	4	1	86	87	3	3	1	1	1
0	103	392	10	34	78	66	143	3	14	2	6	105	3	1	5	21	6	5	37	24	66	19	0	226	131	10	72	1	68	2	4	0	69	23	0	136	68	14	64	75	1	2	55	62	4	3	0	5	0
0	117	477	8	26	85	32	70	2	4	1	2	288	0	1	1	28	5	9	33	18	37	3	0	233	121	8	33	0	205	0	1	0	150	65	0	68	26	6	73	77	11	5	64	48	3	9	2	0	0
3	87	530	11	43	126	124	244	2	6	3	3	174	3	1	0	19	10	8	43	35	126	24	1	324	114	15	115	2	126	2	2	5	112	30	0	203	95	13	65	69	5	3	85	96	2	9	2	4	1
0	88	526	6	49	104	122	198	4	17	0	2	121	4	1	0	21	6	11	37	48	101	21	2	338	232	41	100	2	88	0	2	1	53	16	0	141	83	12	43	57	5	2	76	100	4	7	1	1	0
1	114	383	10	54	95	98	176	3	12	2	2	56	3	0	3	39	7	10	55	33	71	23	4	228	254	13	80	1	56	5	0	2	36	10	1	163	59	5	76	81	0	1	77	83	3	1	0	8	1
1	18	89	2	3	16	9	19	1	4	0	0	0	0	0	2	8	1	3	3	6	8	2	0	66	7	1	11	0	3	0	0	0	0	0	0	20	6	3	16	16	0	0	14	12	0	0	0	0	0
0	76	325	6	42	81	36	63	1	2	0	1	29	6	3	15	6	8	9	38	26	27	9	0	251	37	16	30	1	28	3	3	0	22	4	1	57	29	0	22	22	0	1	60	78	4	7	1	10	1
1	135	730	14	140	370	85	215	6	12	0	3	365	5	0	0	32	14	14	91	77	93	29	1	519	160	39	100	0	282	0	5	1	213	43	0	188	84	11	57	77	7	15	187	218	9	14	1	0	1
1	163	826	22	118	309	102	159	12	19	0	1	267	8	4	1	25	17	25	83	81	89	28	0	510	91	42	103	1	177	1	3	2	149	26	0	152	94	15	61	96	12	5	183	183	14	12	3	6	2
2	199	946	35	147	341	181	314	17	32	1	7	347	13	3	1	27	18	22	135	110	142	57	0	631	46	24	173	3	197	4	4	8	206	53	3	261	142	41	70	64	13	7	220	278	17	13	2	10	0
3	189	917	38	156	379	181	314	33	44	4	8	675	20	9	15	33	16	31	168	169	176	58	1	615	80	26	215	2	407	15	6	5	381	87	8	321	200	42	66	96	21	8	231	358	24	14	3	20	2
6	156	1108	44	173	301	191	327	46	39	3	5	842	31	12	13	42	17	34	157	136	167	83	0	760	188	49	217	5	474	13	9	3	389	124	7	289	244	43	93	102	18	15	202	289	16	25	2	27	1
5	146	1030	46	153	279	180	327	38	25	3	7	875	32	11	14	43	26	25	126	128	165	55	0	686	90	39	209	2	574	9	5	5	515	143	10	279	207	33	86	85	26	16	186	252	15	27	3	28	3
2	115	1287	47	119	237	236	372	26	30	3	6	574	19	15	17	44	30	40	117	113	162	77	0	944	73	40	241	4	481	16	5	5	322	84	8	324	226	40	75	94	12	28	157	217	18	26	2	23	6
3	129	1223	45	156	304	229	348	27	33	2	9	469	31	10	18	37	42	29	152	133	161	73	3	905	244	78	257	2	398	13	7	4	282	71	13	323	230	38	65	98	22	20	196	293	19	23	1	24	5
7	87	1205	42	262	604	175	320	21	24	4	3	318	51	5	19	44	33	31	256	260	143	73	0	891	276	95	214	1	288	19	7	7	215	58	10	300	218	21	72	83	10	15	360	515	28	24	3	33	1
4	93	1142	45	211	427	158	273	21	24	4	8	186	32	15	25	42	34	22	214	175	104	66	1	886	283	87	178	1	163	16	6	10	130	40	13	252	162	27	68	82	7	7	285	380	13	27	5	45	1
3	109	1153	33	161	299	131	319	14	15	4	7	212	18	6	18	35	25	39	164	131	112	44	2	929	393	132	162	2	147	14	3	4	138	25	11	224	143	18	57	70	8	6	214	270	25	20	4	30	0
2	100	1083	36	20	41	151	260	10	21	3	9	145	3	9	18	41	25	33	24	17	108	60	1	885	378	149	180	1	104	11	2	7	106	26	14	196	169	22	73	73	7	3	37	45	15	20	2	31	2
0	94	1166	28	28	48	194	337	13	11	6	4	243	5	18	17	27	15	28	23	25	132	80	0	906	412	164	236	2	178	17	5	3	171	45	17	295	196	21	46	51	9	4	33	44	16	18	2	36	1
2	103	936	28	32	70	156	276	9	10	7	6	299	9	19	22	31	24	26	34	57	111	64	3	739	450	141	181	5	204	15	1	4	208	39	19	225	166	11	45	57	9	8	49	66	17	22	0	32	0
2	129	1080	45	38	75	227	320	6	6	1	13	293	6	16	23	40	28	36	43	31	147	69	1	905	440	185	260	0	176	23	5	3	181	40	18	316	198	5	60	76	12	7	66	76	11	19	2	34	0
2	148	957	38	35	91	78	170	3	8	7	13	232	5	15	24	39	26	25	48	38	61	33	0	806	419	168	106	3	144	15	5	4	149	44	18	131	87	3	67	79	8	7	72	91	15	15	4	29	3
0	112	949	33	37	94	104	205	4	9	8	8	60	4	14	20	29	32	24	47	43	86	40	2	803	424	163	127	3	38	17	7	5	30	11	11	160	126	7	50	51	1	3	71	86	18	21	0	34	1
1	103	978	35	42	99	131	214	9	13	6	9	186	7	12	23	39	25	29	48	51	99	30	2	838	337	157	142	0	139	14	5	6	147	34	10	176	153	12	49	57	10	5	64	73	15	20	0	37	1
0	99	1002	30	24	69	112	205	11	12	6	12	52	10	9	23	32	25	31	27	28	73	47	0	869	348	129	139	2	55	23	2	7	42	8	15	191	122	17	49	65	4	3	38	66	19	19	2	29	1
2	103	1002	26	65	132	164	290	15	15	7	14	87	12	14	22	34	24	27	67	61	104	62	0	905	351	128	207	3	71	16	1	7	62	17	13	259	189	21	49	58	3	3	87	97	13	14	2	24	0
2	132	1035	35	67	140	134	298	14	11	2	10	315	18	9	28	39	27	24	90	48	107	36	2	900	318	123	157	2	217	21	3	1	232	53	11	232	152	14	44	63	17	8	99	128	12	18	1	26	2
0	174	977	38	62	155	138	249	10	9	12	13	202	14	10	23	32	29	26	73	64	104	53	0	869	392	145	168	2	151	19	4	4	137	43	24	218	173	5	53	55	8	4	88	133	19	7	1	31	6
0	176	923	29	73	147	88	165	9	6	11	14	79	19	8	28	35	27	17	77	68	65	40	2	840	358	161	111	1	49	20	3	4	46	13	22	169	91	6	54	50	3	1	107	128	13	13	2	29	0
1	160	987	34	89	149	62	109	1	5	9	15	171	13	9	20	44	21	29	93	70	43	24	3	865	380	122	72	3	126	19	3	1	104	34	23	100	57	1	62	80	8	5	100	140	11	16	0	27	1
0	185	816	39	69	154	87	157	10	10	12	7	209	22	8	28	33	16	21	71	69	68	37	2	720	339	112	115	2	131	17	3	2	119	25	15	111	100	11	54	44	5	6	109	131	12	6	4	32	3
3	137	692	23	82	171	69	158	16	12	9	12	54	17	7	19	34	9	16	80	76	63	33	3	602	311	129	100	5	46	20	3	0	34	9	14	110	99	14	54	53	4	1	97	154	10	9	0	22	3
2	144	667	23	55	168	108	228	5	9	10	9	132	22	6	26	51	21	12	66	76	99	38	1	550	290	113	157	1	92	22	3	4	81	23	19	167	130	9	75	59	2	4	85	140	16	9	1	36	2
0	154	823	22	50	109	80	101	1	4	11	9	109	9	3	24	53	18	27	69	48	51	20	0	725	255	100	69	2	78	17	1	3	61	23	10	106	56	1	49	77	3	4	79	97	7	11	0	19	1
3	157	731	27	62	119	101	224	2	12	12	16	145	16	11	28	34	13	20	56	55	85	44	2	644	306	107	121	1	82	15	4	1	87	22	20	160	123	7	64	65	3	5	66	105	6	15	1	25	1
4	194	863	23	72	152	100	150	18	23	15	18	106	14	10	21	42	12	17	79	56	64	38	0	739	291	105	107	1	85	17	3	2	77	13	19	140	99	13	64	58	5	4	100	124	9	20	3	26	3
5	133	864	20	75	140	88	133	16	22	14	19	121	11	11	21	37	15	17	78	75	57	21	0	731	261	95	95	1	90	14	4	1	76	19	15	131	91	12	43	75	1	3	104	123	10	15	1	25	2
0	119	738	32	71	144	81	165	18	15	13	26	35	13	7	15	54	14	15	80	61	63	34	1	633	202	78	85	1	22	12	2	1	20	4	14	143	91	13	69	71	0	4	94	122	11	13	2	21	1
1	146	749	28	63	175	85	153	4	1	12	22	237	6	6	24	50	13	11	85	78	62	35	1	624	286	103	107	3	165	17	2	6	131	46	18	134	94	1	70	76	7	5	107	148	14	14	1	32	0
0	148	731	31	74	141	77	115	0	4	13	21	145	15	9	19	38	19	19	70	62	55	30	1	618	223	87	81	1	120	15	3	3	93	28	16	97	89	4	71	69	4	3	91	130	3	11	1	30	0
1	122	786	21	52	108	91	181	4	4	12	33	252	8	11	22	48	21	14	58	43	80	29	3	677	274	98	110	2	176	18	3	3	149	47	15	150	102	8	77	66	8	12	67	109	8	11	2	22	1
0	115	754	25	66	146	80	138	6	11	17	24	117	13	10	27	55	19	21	76	62	47	34	2	667	232	65	86	1	89	23	4	5	61	27	18	139	67	10	67	71	2	6	88	131	10	13	0	32	1
2	111	661	20	63	134	55	102	9	8	14	28	39	15	5	27	46	15	16	69	58	40	17	1	598	163	59	61	1	33	11	2	6	18	4	12	93	53	10	70	68	0	4	81	115	8	15	3	22	3
1	96	704	27	56	137	59	112	7	12	10	18	70	17	10	20	43	14	19	61	64	50	28	0	611	257	93	88	1	51	19	4	1	35	9	23	98	80	10	52	69	1	5	89	106	13	7	0	32	1
1	100	697	18	54	103	71	114	5	5	12	26	133	10	8	26	53	10	20	65	50	55	14	2	604	244	73	79	1	103	22	4	1	68	30	20	108	66	4	64	77	4	5	71	107	6	13	0	38	2
0	140	734	14	61	114	102	184	4	2	12	25	98	14	11	22	54	17	19	59	61	81	38	1	628	273	71	128	2	74	13	7	2	68	15	14	155	114	0	79	87	2	4	85	98	9	13	0	32	0
1	132	853	24	40	72	81	133	17	16	10	30	33	10	6	21	59	22	18	34	36	63	27	1	742	161	49	83	4	30	14	5	4	21	3	12	106	86	24	58	109	1	1	45	82	5	10	1	35	4
0	78	675	30	92	161	70	115	24	14	11	25	171	19	8	19	62	10	21	100	79	39	31	4	598	250	64	85	3	119	18	3	1	102	25	12	101	75	22	70	93	8	5	115	133	9	9	2	31	0
3	96	743	16	74	140	79	119	12	13	8	29	48	19	7	19	49	18	17	79	65	47	34	0	681	132	32	78	1	46	16	5	5	25	11	10	110	78	15	71	90	5	0	92	130	9	9	0	21	1
3	112	755	27	54	137	61	83	16	13	15	24	330	20	6	29	45	16	14	70	56	36	19	0	693	233	83	52	2	235	15	5	5	183	60	23	77	47	18	57	84	8	5	95	113	5	13	2	30	0
1	67	754	16	114	223	42	66	2	4	6	27	316	14	6	23	37	18	18	126	94	26	17	3	696	196	71	47	5	229	15	4	2	182	38	12	57	39	6	59	70	12	8	136	188	8	7	0	19	2
1	109	698	29	66	110	67	128	2	4	17	28	191	9	12	30	55	14	13	66	46	47	18	1	656	96	30	85	1	142	23	1	0	110	31	18	98	70	3	69	80	5	3	66	105	4	7	0	29	0
1	100	745	25	41	80	23	48	6	3	7	30	66	10	11	19	51	13	22	57	37	18	7	1	686	211	80	39	2	56	14	3	1	30	8	11	55	27	2	55	66	1	2	59	77	6	12	0	22	0
4	81	715	19	40	84	67	105	22	27	15	32	250	15	9	21	63	10	15	43	42	52	20	4	666	116	43	66	4	164	6	3	3	134	34	10	94	60	20	78	93	10	4	67	67	7	7	1	27	1
2	58	755	24	62	128	51	75	24	28	14	43	261	15	15	21	62	15	11	66	64	33	14	3	696	126	60	50	2	182	19	2	1	160	35	12	65	39	14	75	95	8	5	86	107	7	11	0	30	0
4	80	765	14	47	108	75	150	14	14	20	31	222	9	4	21	62	11	13	48	56	66	24	1	700	177	68	100	0	156	18	1	3	131	30	8	107	87	13	77	85	3	4	71	93	9	12	2	22	1
0	106	775	19	65	111	66	114	6	3	16	27	182	17	10	21	54	9	9	66	50	41	26	0	695	126	49	76	3	142	8	5	0	116	34	11	99	65	1	69	93	6	6	78	112	8	5	1	24	1
1	74	899	23	111	209	60	121	9	10	17	34	79	32	12	29	54	16	14	110	90	46	18	2	812	130	54	76	1	57	23	3	2	42	8	9	93	65	4	90	104	2	3	126	194	12	8	1	38	0
2	30	869	12	63	157	53	109	3	5	21	31	168	15	5	31	61	10	11	74	63	47	20	2	782	121	49	64	0	126	16	2	3	93	16	19	74	64	8	74	99	5	6	111	128	8	12	0	27	0
0	37	734	28	53	139	40	79	4	1	9	35	20	11	7	19	47	14	13	66	57	34	13	0	666	126	33	52	3	22	12	4	5	10	6	10	62	39	6	76	85	0	1	80	135	5	13	2	15	2
1	51	837	22	90	196	67	104	1	0	24	38	129	22	5	21	54	14	9	93	85	54	17	1	736	129	47	85	0	88	22	4	2	64	16	9	78	67	2	106	94	1	4	147	175	6	11	1	26	1
1	33	956	17	72	151	53	101	6	3	16	39	206	12	8	17	58	13	14	81	57	40	17	0	864	110	38	54	1	147	15	0	1	121	36	15	63	55	7	77	109	8	4	105	144	8	12	0	16	1
4	39	770	25	80	130	42	81	11	12	19	32	250	12	13	21	54	13	8	73	56	30	17	2	677	167	44	58	3	216	14	1	0	164	29	8	70	53	16	80	105	9	9	98	122	3	4	0	38	2
1	30	820	15	29	69	48	92	13	15	16	30	270	7	9	22	54	10	12	29	35	37	16	1	728	214	55	48	0	219	11	0	2	169	42	9	72	58	11	76	95	10	9	57	61	8	3	2	18	0
0	37	782	14	42	80	17	45	14	5	14	40	175	5	16	17	71	7	12	45	43	20	3	2	688	144	38	24	3	130	20	5	2	102	23	15	42	24	10	92	125	5	6	53	92	6	6	0	30	2
3	59	795	19	33	70	32	58	22	16	9	39	34	5	7	20	57	12	10	45	27	23	10	1	718	148	38	37	4	33	16	2	2	19	1	15	51	37	11	90	94	1	0	48	52	8	8	1	23	0
2	86	683	25	33	58	32	71	13	9	20	35	0	7	12	20	45	13	12	29	29	28	13	0	633	234	27	38	1	11	19	2	2	1	1	12	59	32	6	71	88	0	0	43	52	8	7	0	29	1
0	71	716	17	102	216	47	92	2	1	15	37	50	17	10	18	65	9	10	101	104	43	17	0	685	311	39	65	2	39	11	3	0	23	10	8	81	54	2	79	116	3	2	146	174	8	10	1	21	0
1	108	897	21	41	97	35	64	9	10	18	29	275	10	15	22	46	18	19	62	34	18	15	1	831	145	39	36	3	218	17	1	1	179	54	6	53	37	11	90	83	5	8	70	90	10	6	2	30	4
1	38	788	22	35	72	70	152	11	6	13	39	302	6	5	23	53	9	12	39	35	54	30	3	608	108	38	101	1	221	19	1	1	178	47	15	106	73	8	71	94	10	11	46	70	7	12	0	19	1
1	54	743	19	66	111	66	139	10	7	13	28	182	11	9	13	52	12	10	74	41	48	32	2	670	141	51	90	0	153	13	0	1	128	13	13	90	84	4	59	101	7	5	81	98	9	16	1	30	2
0	10	670	25	42	85	26	36	1	3	17	36	38	8	7	14	53	11	21	49	33	15	8	0	689	117	33	17	2	34	9	1	1	23	7	12	35	25	6	81	74	1	0	62	83	11	5	0	25	0
0	17	513	18	69	133	33	72	10	11	11	33	131	10	7	14	35	6	14	68	57	19	15	1	452	104	28	46	1	89	9	2	0	73	15	9	54	42	7	60	83	3	3	81	121	7	8	0	19	2
1	22	728	20	96	190	40	61	4	6	14	33	266	20	8	18	58	17	15	86	76	27	11	2	647	106	28	35	1	223	18	2	3	193	38	13	59	28	2	90	104	4	12	135	168	10	8	0	42	1
0	34	898	10	93	175	50	85	2	3	19	41	146	16	9	15	54	18	22	103	63	33	21	2	833	94	36	58	5	111	15	0	2	97	24	13	68	47	0	66	99	6	3	115	156	9	12	0	24	1
3	53	677	22	95	193	53	83	23	11	20	36	219	17	10	20	41	12	17	83	85	37	18	4	643	101	33	54	1	161	9	1	3	144	18	13	57	45	16	61	94	4	12	116	172	6	7	0	20	1
3	22	741	15	167	348	32	63	12	10	15	41	55	34	13	17	57	12	17	160	137	26	13	4	678	97	29	48	0	45	16	3	0	40	14	13	61	20	13	84	82	0	1	221	288	9	13	0	28	0
2	105	722	12	79	173	26	47	12	16	26	42	65	15	7	17	54	11	23	65	77	19	11	1	647	94	33	30	1	40	13	3	1	22	7	6	37	26	13	69	98	3	0	112	151	8	8	2	22	3
0	34	782	24	38	75	47	92	5	1	27	54	50	7	4	18	54	17	26	45	26	28	21	3	710	82	21	55	3	38	14	2	4	33	6	10	59	49	5	88	98	3	1	58	69	6	15	1	21	1
1	50	650	11	24	50	23	51	9	4	26	46	98	3	8	17	49	9	22	20	26	17	11	0	588	114	34	30	3	73	9	1	1	60	10	11	42	26	7	86	81	2	3	40	43	7	6	2	30	0
2	57	779	19	40	88	29	67	7	5	28	53	297	3	8	15	73	14	16	48	23	22	9	2	692	93	23	37	0	204	19	1	1	174	62	6	41	37	8	94	124	10	11	46	79	12	12	0	20	5
0	75	666	9	25	58	21	53	4	4	23	45	51	4	10	14	61	10	19	27	27	17	12	1	606	81	26	29	2	35	19	2	1	25	3	12	34	35	5	90	106	3	2	34	48	7	10	0	22	0
2	86	756	15	54	88	28	102	11	14	25	51	54	9	9	20	63	15	17	50	37	30	17	0	660	124	30	48	1	48	13	5	1	26	10	7	61	42	7	110	117	3	1	68	79	5	9	0	23	2
1	107	775	20	66	133	33	51	6	7	23	31	88	8	4	24	58	12	20	66	48	19	12	4	692	90	14	38	0	54	11	1	0	43	9	8	42	31	2	68	102	5	2	79	104	8	9	3	29	1
2	86	799	14	72	109	14	30	21	14	20	38	343	10	6	8	50	10	16	54	60	14	7	2	709	142	39	21	2	243	8	2	2	223	50	10	27	19	14	89	79	7	10	86	95	3	4	2	23	2
1	115	761	12	37	72	32	38	1	6	22	49	285	6	8	20	69	20	12	40	30	23	8	0	681	162	32	35	3	236	12	6	1	200	48	9	40	25	7	102	100	13	7	58	52	4	4	0	41	1
0	156	816	12	40	67	17	36	5	3	28	37	232	10	9	14	49	14	9	42	28	9	7	2	726	81	22	21	1	193	13	2	0	153	33	8	32	11	2	76	109	8	11	44	60	6	9	1	29	3
2	111	659	9	5	16	22	53	15	16	21	43	35	1	4	21	68	9	8	7	7	27	4	2	592	146	25	34	0	32	16	1	0	20	3	14	53	30	15	103	95	1	2	14	11	4	10	1	29	3
1	100	863	12	15	27	10	27	9	9	19	43	16	1	8	14	59	11	17	17	13	7	4	1	819	87	23	18	0	17	17	4	2	10	0	11	30	11	10	88	104	1	1	21	25	8	6	1	24	4
2	126	690	12	17	33	21	37	13	12	21	49	13	3	2	20	77	8	6	25	16	14	7	0	638	93	27	17	0	14	16	2	1	6	4	7	44	17	11	95	128	1	1	25	41	3	10	4	29	5
0	173	802	16	16	42	25	39	13	16	18	43	15	5	10	11	65	15	21	30	16	15	7	1	717	125	25	20	1	13	14	1	5	11	1	8	28	26	12	91	110	1	0	29	37	6	7	6	24	6
1	181	717	13	40	72	16	44	7	13	18	36	54	5	12	16	47	12	16	47	26	17	7	1	635	291	24	26	2	41	9	2	0	31	11	9	31	30	13	54	82	2	1	55	52	7	11	2	27	6
3	165	547	6	24	53	28	42	17	7	21	45	78	5	9	11	44	12	8	34	19	20	6	1	504	96	18	26	0	51	12	1	0	44	16	7	42	22	17	73	86	2	4	37	47	3	5	2	22	7
0	169	711	11	45	140	19	39	10	12	15	31	152	5	8	12	52	13	17	72	56	20	3	1	617	60	25	26	0	105	9	2	3	93	26	6	34	21	14	86	93	4	4	78	106	9	7	4	19	1
0	166	560	14	23	31	23	30	5	1	18	51	1	5	5	13	65	13	12	18	17	11	4	0	513	40	4	16	1	8	9	1	2	0	0	12	21	22	5	88	92	0	0	25	45	5	5	4	20	7
3	202	894	13	33	70	23	41	13	11	17	27	58	7	3	12	58	11	13	38	29	15	8	0	777	95	30	27	3	44	7	1	3	34	6	6	36	17	13	87	103	2	3	39	59	11	9	3	19	2
0	182	554	14	25	47	19	38	5	2	13	26	40	5	5	15	62	10	14	27	16	10	10	2	501	69	16	26	1	30	14	0	2	20	7	12	29	24	5	94	102	0	2	44	41	5	9	2	27	4
2	172	658	9	37	56	29	59	8	11	20	32	110	9	7	13	50	14	17	40	29	31	7	0	583	83	29	34	1	83	11	0	2	68	21	11	44	35	8	76	98	2	5	37	60	9	8	3	30	5
0	156	653	9	13	27	10	26	7	4	26	45	315	5	6	10	57	8	15	14	9	12	5	1	584	70	19	13	2	269	9	0	1	210	46	9	22	12	8	106	99	11	9	17	29	9	6	0	22	4
1	180	843	11	7	24	30	53	3	2	16	44	344	0	7	17	63	21	22	8	16	26	10	0	765	55	16	36	0	272	14	6	1	247	51	14	49	24	3	107	108	15	9	20	21	5	5	1	27	6
0	179	611	7	18	22	11	23	15	17	19	51	294	2	9	12	74	6	11	17	14	8	5	1	546	105	17	16	1	260	12	4	1	212	47	7	25	11	20	95	114	10	9	21	28	7	3	5	21	8
0	182	706	12	45	77	7	23	12	14	16	42	285	6	4	15	54	15	8	41	36	7	3	1	637	75	11	6	0	227	13	1	2	200	40	8	16	10	9	87	99	16	11	44	74	10	7	4	25	6
2	194	542	17	43	83	70	151	11	11	22	38	105	7	5	15	58	13	10	52	38	52	28	3	513	44	18	92	2	76	11	4	1	58	12	7	98	145	10	78	102	6	2	65	67	6	6	5	34	2
2	192	624	13	46	82	55	95	24	12	20	32	28	7	9	11	53	17	20	45	40	27	27	0	658	79	16	57	1	30	12	3	2	20	6	8	60	44	15	92	98	0	2	56	69	6	11	5	26	4
0	183	621	11	31	44	11	23	4	3	15	28	124	2	6	11	48	18	13	32	19	5	7	0	569	41	11	12	2	85	13	4	1	79	17	7	21	9	4	80	93	6	2	31	52	7	5	4	37	6
1	141	606	13	6	13	23	34	16	11	13	27	19	1	8	15	51	10	14	6	6	16	3	0	541	37	20	18	2	19	11	1	2	7	4	9	28	23	14	70	107	2	0	11	21	13	8	2	41	5
0	125	539	11	45	74	20	40	11	10	14	39	39	6	6	12	57	8	21	44	31	12	10	5	503	46	13	20	0	28	10	0	2	22	8	12	35	22	3	83	104	1	0	59	68	6	8	2	25	7
1	37	857	7	36	75	74	151	13	13	13	28	20	5	8	19	48	17	17	51	39	51	31	0	748	59	12	103	1	18	8	2	2	9	4	6	88	76	18	65	86	1	0	59	58	13	9	0	26	1
1	37	595	11	60	76	61	105	13	12	12	23	36	7	0	14	52	10	15	46	42	33	25	1	544	44	5	60	0	16	10	3	1	20	4	7	77	52	9	70	81	2	1	57	74	8	11	0	28	3
2	14	445	10	12	35	17	32	25	17	12	29	27	1	8	13	63	12	9	19	14	12	7	1	401	120	21	19	3	26	14	2	2	18	6	10	18	19	16	78	97	1	1	21	39	4	6	1	22	1
2	35	533	14	3	5	42	86	12	12	19	34	15	0	14	15	57	13	9	4	2	23	25	1	495	59	15	46	1	10	19	0	1	8	2	10	66	46	11	84	100	0	1	7	13	6	8	1	42	2
1	9	638	7	28	54	52	88	13	7	12	39	205	1	3	19	56	4	20	33	27	38	18	2	533	53	13	62	1	159	18	0	1	136	33	13	72	41	8	78	88	6	10	38	56	10	8	0	35	0
2	15	398	12	42	70	24	46	3	7	14	33	30	6	5	24	50	10	9	46	33	17	8	3	360	57	12	28	1	24	10	2	2	17	8	11	44	21	1	55	76	2	1	62	66	2	5	0	32	0
2	26	717	12	29	48	26	50	14	18	12	20	78	5	8	17	37	12	14	38	17	16	11	1	617	55	8	33	1	51	13	0	2	47	11	11	39	30	11	63	71	4	1	47	51	5	4	0	44	0
1	21	523	10	37	72	14	18	22	14	14	29	320	7	6	10	49	12	9	42	37	6	4	0	469	68	4	12	3	254	10	0	3	214	47	9	23	13	14	84	86	9	11	54	65	8	12	0	26	2
2	42	600	14	40	53	18	41	16	13	10	18	300	4	9	15	46	13	8	41	36	12	9	0	517	86	10	25	1	243	17	1	1	204	45	11	33	26	12	58	75	12	9	36	52	2	6	0	31	0
1	41	460	12	40	69	38	67	12	11	16	19	57	4	4	12	54	11	8	45	35	27	12	2	419	52	15	48	3	46	9	2	2	40	8	6	46	43	11	70	87	1	2	39	65	3	6	0	24	0
0	41	579	12	32	76	35	45	6	10	12	46	21	6	7	25	68	16	8	37	33	25	11	2	519	32	14	45	3	14	20	0	0	9	1	11	47	34	7	74	116	0	0	46	54	7	4	2	48	1
2	28	816	16	11	27	20	40	2	4	16	25	78	4	3	12	59	15	19	18	11	11	12	0	675	21	6	25	2	37	9	3	3	34	6	5	36	26	2	83	92	1	1	16	28	4	7	2	18	2
0	35	704	11	38	71	12	41	5	8	10	35	57	7	6	14	61	14	19	33	38	14	7	0	621	55	14	18	2	35	9	1	1	31	9	13	18	24	9	68	101	1	4	45	56	9	8	2	27	1
2	80	746	8	78	124	16	33	27	22	13	32	147	9	7	15	59	10	15	82	53	16	6	1	649	65	9	19	0	107	13	2	1	78	25	12	27	20	15	83	78	3	4	85	104	7	6	2	38	2
4	42	869	9	72	97	26	55	12	8	6	33	301	15	9	29	39	14	16	70	49	26	9	2	769	44	8	38	2	237	24	0	2	206	47	20	55	30	8	70	53	10	7	62	109	4	7	1	40	3
3	43	809	9	74	121	34	61	18	11	7	28	115	14	3	15	40	10	19	57	69	26	15	1	692	36	2	48	1	92	11	2	1	73	19	7	44	42	13	69	73	4	2	86	104	10	6	1	19	2
1	59	712	7	50	87	28	60	11	3	13	36	44	6	6	21	65	13	7	50	43	17	14	2	594	28	3	35	0	20	17	4	2	16	2	12	43	26	7	111	102	1	1	63	77	8	4	2	33	1
2	61	860	4	24	30	10	30	5	2	10	28	27	4	3	19	42	12	6	23	21	9	6	0	742	35	8	13	1	13	18	1	0	9	3	14	24	12	3	53	72	1	0	24	32	6	6	1	30	1
0	50	610	6	25	32	24	38	0	0	8	29	166	7	8	13	42	11	10	20	12	11	9	1	530	34	8	25	2	120	14	1	0	86	21	16	28	22	0	52	73	11	2	34	36	4	7	0	29	1
3	14	534	6	15	37	16	23	25	19	17	30	95	4	7	12	65	12	6	24	11	6	5	3	491	31	1	15	2	62	15	2	1	55	10	6	23	13	26	80	99	2	4	21	37	4	10	0	26	2
1	36	843	7	30	53	33	50	15	13	8	18	30	3	2	10	45	11	12	39	23	22	10	2	696	45	6	33	0	15	7	2	1	8	1	10	41	31	15	63	92	1	0	45	48	5	3	0	17	2
0	122	844	9	15	36	5	16	2	3	17	31	54	2	7	25	44	17	15	19	17	6	4	0	710	32	0	9	2	30	19	3	0	30	11	15	15	9	5	68	68	4	0	30	29	5	5	3	40	3
1	281	897	9	36	57	39	72	14	12	12	25	61	6	6	14	34	10	4	47	27	33	12	0	734	62	5	53	2	28	8	2	1	31	7	4	54	39	10	61	73	3	0	31	68	2	7	6	23	8
0	220	1117	7	37	83	39	76	16	10	12	25	144	10	3	18	55	13	8	43	36	20	17	0	931	46	8	36	1	83	11	1	0	69	18	8	49	38	9	72	80	6	1	57	64	7	6	3	33	3
1	140	1054	8	31	36	15	33	4	2	13	23	91	2	7	20	49	14	6	31	20	9	7	0	791	28	8	19	0	50	15	0	0	48	6	10	19	21	5	42	73	2	0	31	51	2	4	2	33	4
2	91	899	8	33	90	28	36	18	10	9	23	158	10	9	14	47	12	12	57	33	14	9	2	755	30	3	25	2	112	21	3	0	106	19	13	29	30	17	64	69	5	5	51	71	8	4	1	25	2
6	33	1150	5	55	117	18	35	11	14	12	27	97	16	7	23	50	5	4	67	51	7	7	0	840	13	0	15	1	55	12	2	0	47	13	12	24	19	14	64	84	4	1	70	103	7	4	1	38	0
3	27	987	9	123	201	7	15	18	10	11	29	31	24	3	18	46	8	12	100	90	10	0	3	772	31	1	9	0	13	7	1	1	8	3	9	17	7	9	56	64	1	1	123	174	2	8	0	25	1
1	56	761	8	21	35	45	88	9	16	14	32	56	2	6	16	42	13	9	20	15	29	20	0	611	48	6	53	1	36	15	1	1	30	6	7	61	53	11	54	74	0	0	30	39	7	7	0	34	2
4	68	802	12	44	87	66	130	10	8	11	29	66	8	5	15	43	8	6	46	33	40	28	4	606	22	4	71	2	31	15	1	3	29	7	13	74	71	13	57	65	3	1	61	80	5	3	0	37	3
1	44	778	6	26	65	69	100	15	9	3	17	82	5	5	18	39	16	10	33	20	36	21	1	612	30	14	63	2	39	19	1	1	32	13	15	58	72	19	44	63	2	2	39	53	7	4	0	26	2
1	75	809	9	60	119	16	22	14	11	8	23	64	9	6	14	48	9	12	62	51	8	5	1	665	12	5	13	2	38	16	0	0	27	6	10	22	13	10	67	65	2	2	78	100	2	8	1	21	4
2	263	1045	8	94	186	33	55	23	16	18	36	56	21	3	17	61	11	25	75	83	17	12	1	834	105	3	34	1	44	12	8	2	27	2	12	51	36	17	74	89	0	4	131	154	12	11	7	35	7
0	352	865	8	123	232	67	122	13	13	9	27	101	19	12	14	53	7	13	104	103	36	19	0	694	24	10	62	2	66	19	0	0	61	14	8	81	62	19	77	87	2	4	158	200	4	10	3	39	1
1	274	1080	9	170	301	34	68	5	6	12	23	23	20	10	14	66	11	13	152	125	17	14	1	719	14	0	43	0	10	11	0	0	7	3	7	44	35	10	100	99	1	0	211	250	6	9	6	33	6
2	160	1105	5	175	339	35	93	17	13	7	23	30	23	8	25	39	13	8	175	136	28	20	2	858	23	4	53	0	17	28	4	1	10	1	13	60	46	12	76	72	1	0	214	300	2	5	3	45	4
0	111	1118	8	109	209	9	25	11	12	14	25	71	19	4	23	71	10	6	115	82	8	3	1	829	26	5	21	2	42	20	1	0	32	9	17	25	14	13	102	92	1	7	149	169	5	6	3	35	1
0	64	880	11	100	143	43	56	1	0	15	20	131	15	1	17	56	11	8	75	73	27	8	1	721	40	10	45	2	77	17	4	1	69	15	6	56	33	1	57	110	4	7	95	136	5	4	1	23	5
3	72	1069	3	74	112	10	14	18	9	10	17	19	12	6	20	58	7	9	65	55	4	4	3	791	16	4	11	1	20	20	2	0	11	5	19	10	12	23	49	67	0	1	67	110	4	2	2	34	7
1	21	1166	8	21	38	51	91	12	8	18	21	8	3	4	12	58	14	7	29	9	31	23	0	893	18	3	63	2	2	13	0	1	0	1	11	64	48	7	69	81	0	0	26	28	5	5	2	23	2
2	31	1095	2	35	57	30	55	28	12	15	33	56	9	6	12	61	13	12	38	33	20	9	1	825	14	2	38	2	37	17	1	2	24	12	11	47	30	23	88	74	0	3	43	42	2	8	1	25	3
1	25	986	9	12	20	39	67	8	7	12	32	74	2	11	12	54	12	2	8	11	26	8	0	697	29	4	39	0	39	16	0	1	43	14	15	36	40	7	86	79	2	1	17	13	5	4	0	34	1
1	32	1223	5	13	25	21	50	8	5	12	24	88	2	12	22	62	9	8	8	15	19	7	1	914	12	1	27	2	63	20	2	0	53	12	15	35	28	6	81	93	3	1	11	20	4	5	1	55	0
2	69	1417	9	28	51	52	103	16	14	7	31	64	4	2	16	69	15	9	30	24	40	13	0	941	11	0	59	0	46	8	2	0	33	8	10	52	59	19	90	94	4	0	33	41	5	7	2	21	4
3	137	1360	9	35	73	19	24	20	15	6	23	36	8	10	17	46	22	17	39	33	8	4	1	698	9	0	10	1	28	10	2	1	17	4	10	19	13	14	46	75	1	2	36	62	4	7	3	47	5
1	177	1176	1	23	44	36	90	11	18	7	26	72	4	7	26	51	11	15	26	17	28	15	1	820	25	10	46	1	44	17	3	0	35	10	16	50	47	20	61	89	1	2	27	34	5	4	4	50	8
0	209	1004	10	61	113	33	62	7	6	9	27	53	9	4	15	46	16	11	56	59	23	11	1	647	20	6	34	0	35	12	4	1	13	6	10	45	43	11	46	67	2	1	63	97	4	3	4	38	7
3	190	1291	5	12	19	45	85	20	14	14	30	69	0	3	20	46	10	6	7	9	24	20	2	846	15	4	51	0	49	12	0	1	35	7	6	44	54	26	59	64	3	2	13	20	3	1	2	38	8
1	206	977	4	34	71	37	78	5	8	15	19	62	1	9	19	50	14	6	37	39	22	15	0	706	5	3	42	0	33	21	2	1	27	7	6	48	36	6	57	71	0	1	42	62	10	8	0	37	1
4	148	1133	10	44	82	26	64	16	11	14	17	64	8	8	10	50	17	9	46	39	24	8	2	781	17	6	40	0	38	20	2	0	32	10	13	30	43	17	47	71	0	2	52	57	3	7	1	35	4
1	156	817	5	40	72	31	68	13	13	15	22	90	4	5	19	44	10	12	53	32	17	14	2	590	8	1	38	1	56	12	0	1	54	18	17	49	33	12	43	64	2	3	44	59	7	6	3	36	4
0	137	1282	6	11	18	24	54	12	10	10	23	64	3	5	24	62	8	14	14	4	16	7	2	875	33	1	36	5	46	22	3	0	27	11	10	24	39	13	71	85	0	2	12	16	6	8	4	37	10
1	162	1127	11	41	66	36	77	18	11	8	22	51	7	2	19	60	8	13	46	30	22	20	0	752	8	2	54	1	34	16	4	1	24	8	10	50	45	14	62	80	1	1	49	52	4	3	3	31	5
0	138	1334	7	24	33	10	28	2	0	11	15	90	1	5	17	41	8	13	22	16	8	4	0	809	0	0	13	2	53	10	2	1	45	8	9	17	16	0	48	51	2	1	29	21	7	5	0	31	5
2	143	1016	4	47	74	28	57	21	15	8	16	43	9	7	11	40	16	12	37	39	13	16	2	699	9	5	39	2	27	12	2	4	22	8	5	32	39	23	58	66	0	1	49	71	6	11	2	28	9
1	150	1450	4	14	29	20	25	7	14	8	14	34	2	6	21	44	13	9	22	14	9	6	0	978	2	0	20	1	19	12	1	0	9	5	12	24	26	15	58	89	1	1	23	23	2	3	3	39	6
1	156	1178	8	47	91	87	186	8	10	2	10	12	5	7	19	53	10	7	45	46	64	31	0	683	1	1	97	4	5	11	0	1	1	1	9	112	103	11	67	67	0	0	60	70	6	6	4	33	2
0	153	1247	3	20	45	49	92	17	18	10	20	71	0	2	18	39	9	11	32	19	29	15	1	718	9	1	56	2	52	10	1	1	35	10	10	49	62	13	59	76	1	2	27	37	6	7	3	29	11
1	73	1144	5	63	113	32	55	15	9	5	21	192	9	15	11	48	11	7	71	48	16	10	1	759	8	0	39	1	137	10	6	1	113	35	7	44	35	12	58	63	2	6	66	104	6	5	3	45	3
2	68	1356	8	69	102	22	39	16	12	8	21	26	4	9	24	49	13	13	52	52	15	5	2	785	20	4	21	1	12	21	2	2	7	4	8	32	25	7	55	66	2	0	63	87	9	2	2	37	9
6	44	877	3	45	99	29	65	13	15	16	31	46	6	10	26	48	8	7	49	41	24	13	2	603	13	0	36	2	27	27	4	1	16	4	13	33	33	23	77	72	1	2	64	72	8	5	1	56	2
1	48	1340	7	38	82	24	50	11	17	13	23	14	7	8	23	43	13	8	36	38	18	6	1	886	23	0	25	4	14	10	0	2	9	4	14	35	32	17	77	73	1	0	44	65	1	6	0	55	2
0	43	1326	7	34	98	54	86	11	6	10	34	5	9	4	17	56	11	12	56	42	30	16	1	745	21	0	56	0	7	15	4	1	1	1	9	53	58	9	94	108	0	0	61	72	5	4	1	30	1
1	7	1092	3	43	77	64	123	13	10	11	19	49	6	3	18	43	7	12	46	32	39	22	3	658	21	1	74	1	25	16	0	2	28	9	8	83	60	18	79	84	2	1	62	56	7	9	0	33	0
0	20	1205	2	85	136	14	48	6	5	12	24	105	13	3	11	36	16	10	78	61	18	6	0	777	17	7	21	2	73	7	1	0	57	11	2	33	21	14	62	62	4	4	99	110	6	8	1	18	1
2	36	1050	6	18	55	38	61	15	15	9	27	66	2	7	9	49	8	13	32	20	18	15	2	686	5	0	39	2	39	11	1	0	37	7	6	42	41	13	78	84	2	1	36	49	7	6	3	20	2
1	27	1219	2	66	121	19	39	14	9	9	16	45	10	5	15	33	8	6	73	50	13	6	0	775	4	0	21	2	31	14	1	1	33	5	6	29	24	9	72	75	1	1	91	89	6	4	0	33	1
0	16	775	6	61	100	58	103	12	14	10	20	22	11	3	16	52	8	8	72	36	41	15	1	597	22	4	69	2	14	12	1	1	8	5	5	74	70	15	79	89	0	1	70	94	2	7	0	32	3
5	182	971	6	30	65	16	30	18	25	10	23	82	8	6	12	53	5	4	31	25	14	6	1	675	15	4	17	1	48	11	3	0	49	11	7	19	23	20	106	88	3	2	33	59	2	2	5	27	5
4	143	968	7	36	58	35	54	21	15	10	19	57	3	9	14	55	10	4	31	31	21	9	3	677	8	0	31	1	34	18	1	1	32	6	13	36	36	15	86	100	0	0	45	53	2	7	4	36	5
0	44	965	5	53	103	51	101	3	5	16	26	59	9	7	20	61	5	6	53	33	34	16	1	749	16	1	65	1	31	16	1	0	31	9	15	62	60	2	86	116	2	2	70	78	4	4	1	31	1
0	34	1164	6	60	115	16	44	12	13	15	26	19	9	11	14	45	6	5	70	45	19	6	1	792	14	4	27	1	13	20	2	0	10	4	10	30	25	16	74	95	0	0	86	83	3	10	1	34	2
2	36	1156	2	77	140	35	61	9	6	11	14	0	11	10	19	33	9	12	91	65	19	17	0	737	2	0	35	1	7	12	3	0	0	3	17	43	43	16	61	61	0	0	99	118	3	4	0	31	2
1	116	1245	1	47	69	35	65	8	4	13	24	30	9	12	15	30	10	3	44	33	19	15	2	819	23	7	39	2	27	23	1	0	19	8	18	47	37	4	70	55	2	0	55	59	4	9	1	43	9
0	240	1101	6	41	89	32	63	3	4	9	17	91	7	4	18	50	9	8	47	39	21	17	0	593	9	0	47	1	61	17	5	0	57	21	5	42	38	2	74	64	4	4	62	62	6	13	1	25	9
1	142	1214	6	29	47	19	42	12	12	11	24	68	4	3	32	53	7	11	23	21	13	6	2	659	16	5	23	1	45	16	1	1	39	13	15	20	30	22	83	91	3	2	39	36	7	4	4	44	6
1	85	1206	9	31	67	53	93	15	12	8	24	70	6	10	18	52	12	5	34	27	31	21	1	814	16	3	51	2	44	21	2	1	32	20	12	53	74	11	82	110	2	1	40	45	5	2	1	30	5
6	77	1105	4	34	72	43	87	20	12	5	14	59	7	6	25	40	8	6	42	34	28	14	0	662	15	8	61	2	51	23	1	0	38	16	11	58	50	18	55	82	2	1	44	54	6	5	1	41	3
4	40	1102	6	28	67	33	81	16	8	8	31	119	3	7	15	58	14	3	28	20	26	11	1	765	1	0	42	2	79	19	0	0	69	16	10	46	50	17	85	77	5	3	44	47	5	6	0	36	2
1	19	956	3	66	134	42	52	18	9	8	22	29	4	8	24	50	7	7	82	60	24	8	1	659	9	1	41	0	27	17	1	3	20	16	11	40	36	17	81	89	5	0	95	103	5	8	0	31	1
1	23	1291	5	56	105	27	37	9	6	12	11	35	5	5	20	53	7	7	51	62	13	4	2	810	6	2	14	2	33	19	2	1	17	14	9	26	28	9	67	76	1	1	56	107	4	4	1	30	0
0	8	1116	4	53	96	37	53	0	0	10	26	32	8	6	16	59	11	9	51	42	18	11	3	551	0	0	36	0	27	15	1	0	22	7	14	36	39	0	97	112	1	1	57	86	8	4	0	32	2
5	18	1181	2	83	158	31	67	9	4	16	28	32	12	11	15	44	16	8	76	76	17	16	0	687	1	1	37	2	21	13	3	1	15	14	10	42	41	5	69	76	1	0	103	138	4	9	0	21	0
2	64	1275	7	93	167	28	50	19	19	11	18	15	12	8	21	46	8	12	71	80	12	9	1	752	0	0	31	0	10	17	1	0	8	14	12	39	27	24	76	86	0	0	104	146	10	9	1	42	5
3	160	1023	3	71	134	29	79	11	7	10	16	17	16	2	10	41	11	14	71	60	29	10	1	651	6	6	44	1	22	10	3	1	8	9	6	42	36	9	65	69	2	0	97	115	14	12	3	22	6
5	188	950	9	149	278	62	123	16	10	8	8	44	21	4	28	46	12	16	148	116	39	18	1	613	6	0	71	1	38	25	1	2	25	16	8	62	80	22	74	67	2	2	173	251	6	5	1	37	6
4	191	1048	6	108	188	9	18	11	17	6	22	17	18	7	13	45	9	5	101	87	6	3	2	598	5	0	9	0	15	6	2	0	10	14	6	8	14	13	77	83	0	0	144	164	3	13	0	28	12
1	181	1027	4	53	105	13	35	18	17	9	11	47	9	6	18	55	13	6	65	42	10	4	0	681	9	0	19	1	32	11	3	0	27	12	7	24	19	19	70	93	2	1	69	90	2	6	3	27	6
0	58	1033	3	73	123	57	125	3	0	12	12	18	9	6	20	50	10	9	67	54	42	22	1	663	11	3	66	1	9	18	1	1	8	13	9	65	77	2	85	93	1	0	102	104	4	8	2	31	3
0	303	1069	2	27	44	22	27	0	0	15	31	0	6	2	18	83	10	9	32	17	10	7	2	737	10	1	17	0	4	14	3	0	0	19	6	28	19	0	131	124	0	0	40	29	2	6	1	22	8
4	256	1154	7	66	156	5	11	23	12	12	28	75	14	9	11	65	10	7	72	80	3	1	3	759	10	4	5	0	57	22	0	1	47	26	10	9	6	22	63	110	2	2	96	121	7	12	0	45	4
1	136	1084	5	68	139	22	28	16	14	8	15	133	9	5	19	39	9	12	83	51	9	9	2	640	15	1	23	2	83	17	2	1	74	32	7	24	17	25	51	68	8	3	103	106	3	10	4	38	4
4	101	873	3	60	111	25	52	11	15	9	25	101	8	9	16	46	10	11	61	43	13	14	0	563	0	0	35	0	62	14	4	1	52	27	6	34	27	13	70	77	6	1	63	92	9	7	1	40	2
2	34	1158	5	80	142	17	39	2	6	17	25	17	12	3	10	36	3	3	74	65	8	7	1	767	1	1	18	0	11	10	0	0	7	16	13	25	18	6	63	76	0	0	103	102	3	3	0	21	4
0	41	929	3	80	146	22	53	2	2	16	25	14	16	6	22	51	13	12	85	68	16	8	1	576	1	0	34	0	22	25	1	0	9	15	12	27	34	2	75	76	0	1	110	117	6	6	1	32	1
0	22	995	6	92	173	21	42	2	3	12	26	19	10	4	15	39	12	7	78	79	11	8	1	578	2	0	27	1	16	11	5	1	8	15	5	28	26	2	56	58	0	1	115	151	7	11	1	18	1
0	43	1057	6	93	163	9	18	0	2	14	38	24	11	10	15	48	15	11	87	75	8	2	0	689	10	1	10	1	15	10	2	1	11	9	9	12	14	0	63	74	2	0	119	137	3	8	2	36	2
5	26	1005	13	81	162	55	99	23	12	14	24	59	10	11	20	45	2	3	85	68	32	19	0	666	11	1	50	0	43	24	1	1	35	28	11	52	62	25	77	86	1	1	96	135	6	3	0	45	1
6	117	930	3	67	140	15	43	14	18	11	27	52	11	6	20	47	7	11	66	64	9	11	2	617	6	0	22	0	41	13	3	0	22	20	12	27	26	20	94	102	3	0	94	108	9	10	4	35	4
2	141	1106	5	104	195	26	62	11	28	12	19	40	12	8	17	48	9	12	108	83	14	6	0	616	15	1	28	2	33	17	0	0	18	14	13	41	25	23	63	83	2	0	127	159	10	9	2	41	3
1	177	957	3	95	177	17	32	3	2	8	22	36	16	9	18	53	11	14	89	79	16	3	1	586	16	0	19	1	17	15	3	0	16	16	10	27	25	2	75	72	2	0	103	150	7	7	1	32	5
0	127	963	6	115	177	22	59	1	0	11	19	48	13	5	13	34	4	11	113	76	22	10	0	601	6	0	27	1	30	11	4	0	21	13	5	32	37	1	51	56	1	3	120	153	9	4	0	26	8
0	112	1046	5	125	191	20	27	1	0	8	20	19	25	6	14	42	7	8	102	92	12	7	1	660	7	0	21	2	17	10	1	1	10	6	13	24	21	2	58	73	0	0	138	183	6	8	2	32	8
1	193	978	3	130	243	12	27	13	11	12	15	34	17	9	16	32	5	7	130	88	10	7	2	718	17	0	21	1	22	16	1	1	17	9	10	17	12	15	45	62	3	0	147	215	6	2	2	45	6
2	155	1102	4	113	181	35	57	4	1	9	18	32	14	7	19	39	5	2	112	84	15	13	3	702	3	1	39	0	27	17	1	3	21	7	10	39	35	9	54	78	3	0	136	158	6	5	2	40	3
1	80	997	6	95	162	35	54	5	4	8	23	187	16	7	14	29	5	9	91	73	20	15	0	594	2	0	37	1	133	17	2	0	112	25	5	35	38	1	59	61	2	3	101	162	3	7	1	29	3
1	21	1084	5	71	131	36	67	0	2	9	19	82	14	6	16	32	8	8	75	54	25	8	0	643	2	0	40	0	62	19	1	1	47	12	13	48	43	1	54	80	3	1	89	102	11	6	1	33	0
0	48	926	7	55	109	23	30	4	1	18	22	75	14	6	12	48	10	14	62	50	11	6	2	533	1	0	19	1	60	14	0	0	41	20	6	22	20	3	59	79	4	2	68	108	5	7	0	26	3
0	110	878	3	103	178	69	114	1	1	14	21	17	10	8	15	31	11	8	115	68	30	24	2	574	1	2	74	1	11	20	0	2	8	6	15	81	68	1	67	80	1	0	107	154	6	8	0	52	9
2	121	947	3	82	136	19	41	24	10	11	30	9	13	4	15	40	12	18	95	54	11	10	1	626	7	2	35	0	6	20	2	0	0	0	10	33	28	22	60	80	0	0	104	111	5	7	1	31	10
4	118	961	4	94	171	20	55	18	26	12	18	134	20	5	17	38	7	7	111	90	16	8	1	591	2	0	31	0	89	24	2	1	70	20	14	22	43	32	72	72	5	3	137	149	3	5	0	33	4
5	160	880	4	97	116	12	45	20	19	7	18	95	10	5	14	30	9	10	76	76	11	6	2	562	0	0	18	2	77	19	3	0	39	17	13	18	25	24	52	54	2	4	99	116	5	6	2	41	12
2	179	978	4	107	182	12	21	9	13	15	20	48	21	14	18	33	4	5	94	89	8	5	1	693	2	2	19	0	27	18	0	1	24	8	21	24	13	16	78	68	1	1	130	153	4	7	1	53	5
0	121	955	7	125	237	57	106	0	1	20	28	63	16	9	22	46	6	11	121	98	31	21	1	583	18	12	63	0	45	28	4	3	38	5	13	60	75	1	83	81	1	3	169	172	5	8	2	45	4
3	30	974	9	127	213	22	40	22	22	15	20	19	18	3	10	43	7	6	128	87	14	9	0	591	2	0	29	0	13	9	3	0	9	4	5	19	27	16	82	99	0	1	164	171	4	4	0	17	4
2	58	994	8	125	240	18	30	16	19	7	30	58	22	7	13	34	6	5	119	93	12	7	1	615	9	0	22	1	38	19	1	1	31	8	9	26	20	15	74	88	1	1	168	187	5	5	1	22	4
2	94	946	1	137	209	43	71	13	27	8	32	53	20	10	9	39	4	4	116	91	34	15	1	628	3	0	51	2	48	17	1	0	35	9	9	37	58	21	64	78	0	2	152	173	3	4	3	26	6
5	80	892	7	138	247	8	16	16	11	13	26	55	24	7	16	31	6	7	136	113	6	6	0	572	7	0	9	2	38	15	1	0	28	13	15	15	4	10	50	70	3	0	175	189	3	5	2	35	3
2	138	1024	9	145	271	16	33	15	21	16	35	139	17	7	15	37	5	8	143	109	17	5	0	629	46	0	21	1	104	18	1	0	70	29	14	15	22	24	44	71	3	6	200	198	2	8	1	35	8
3	131	935	6	112	221	36	51	17	5	14	31	34	13	7	14	36	6	8	139	94	16	15	3	597	5	1	36	0	20	23	0	2	14	6	16	34	34	6	60	75	1	1	150	172	4	2	0	43	6
0	130	933	5	110	227	38	75	1	3	21	31	25	14	8	19	30	1	4	121	99	27	6	2	610	6	3	53	1	15	26	1	0	7	4	8	43	44	1	66	68	0	0	164	158	3	2	0	42	8
0	140	964	4	122	209	21	40	5	6	10	28	45	15	8	14	33	5	10	126	90	18	6	0	624	5	2	29	1	36	24	1	0	25	9	15	32	17	6	67	66	2	0	141	182	1	1	1	40	8
0	111	1113	5	171	247	4	23	1	0	19	30	35	24	5	9	29	7	7	140	113	8	3	2	689	1	1	13	2	26	18	2	0	19	1	6	16	8	0	59	68	0	0	187	209	7	3	0	16	4
5	165	908	7	158	299	40	51	7	6	25	31	156	13	7	15	31	5	10	164	128	24	6	0	532	9	3	32	1	113	18	1	1	125	21	11	33	36	7	49	66	6	3	224	211	5	5	3	39	8
3	153	888	4	164	268	30	51	15	16	14	42	63	14	13	9	27	8	5	163	114	21	6	1	520	0	0	27	0	47	24	2	0	32	11	17	40	26	19	59	81	1	3	187	220	6	4	1	43	5
5	138	853	6	143	288	21	34	17	19	13	34	1	13	10	11	29	6	6	172	112	10	4	1	558	0	0	20	0	5	21	1	0	0	0	9	26	17	21	62	59	0	0	176	233	5	6	1	31	4
2	261	955	5	174	287	19	41	3	2	15	30	74	20	12	11	32	7	3	166	107	18	6	3	566	7	2	25	0	57	29	1	2	45	17	9	39	18	4	65	66	2	3	177	234	0	3	1	39	4
1	125	812	11	187	320	33	72	3	2	18	26	78	20	5	13	23	2	7	184	150	31	11	2	517	6	1	54	1	58	22	0	2	39	13	11	45	47	3	68	66	2	2	230	275	2	5	0	34	3
0	51	893	4	156	290	22	42	3	4	7	20	101	18	11	15	28	6	5	165	115	10	6	2	600	9	4	22	0	87	22	2	1	60	11	10	27	20	3	53	51	0	3	190	215	1	4	0	46	4
1	36	1097	7	177	336	56	115	1	2	12	20	115	12	6	13	19	4	7	178	149	32	20	2	676	6	3	70	2	72	15	0	0	76	16	6	54	80	1	37	46	8	1	220	252	4	1	2	29	3
0	33	892	3	126	271	13	23	2	1	16	25	14	9	11	15	28	8	7	155	145	6	7	0	644	7	5	12	1	23	18	5	1	8	4	13	15	15	4	59	83	0	1	190	220	4	5	0	37	1
2	80	1000	0	160	295	54	78	21	15	13	31	35	15	16	19	23	7	4	167	124	31	16	3	591	9	6	63	0	28	21	0	1	17	6	10	62	57	25	69	69	2	1	227	222	0	6	1	47	1
1	43	1066	7	117	213	22	28	13	13	12	25	31	8	4	9	18	6	6	137	120	11	4	1	660	2	0	17	0	26	12	1	0	17	5	7	26	13	14	52	71	2	1	165	179	4	7	2	25	3
3	77	793	4	163	255	88	171	20	11	8	26	93	9	8	13	34	6	9	145	118	62	26	1	580	1	0	77	0	65	18	1	3	63	17	15	92	77	15	60	73	2	2	174	208	2	8	3	38	5
0	112	973	5	132	244	19	45	0	0	14	19	120	8	4	10	23	7	13	138	98	17	12	0	609	6	2	28	1	76	16	0	0	69	24	6	34	17	0	52	61	5	3	163	183	6	4	2	31	5
0	114	917	3	130	282	56	109	1	3	12	27	97	11	6	15	20	6	16	171	140	37	16	2	586	8	2	64	4	62	27	0	4	54	15	7	67	67	3	46	50	1	3	198	240	8	8	2	45	7
0	77	947	5	144	282	14	12	0	0	12	22	40	13	12	18	18	5	8	166	125	6	3	1	578	6	1	12	0	16	27	0	1	11	0	15	19	6	0	38	45	0	0	203	198	5	8	1	54	5
0	134	857	5	141	275	32	52	4	1	11	26	48	17	11	15	32	5	6	165	123	22	16	2	547	8	1	34	1	29	22	2	0	16	6	18	44	30	1	47	82	0	1	211	203	2	4	0	45	3
0	157	913	3	124	230	23	53	0	0	15	20	64	14	8	10	22	8	5	118	109	14	9	0	640	9	1	23	1	32	10	2	1	37	5	9	33	24	0	50	61	1	2	162	197	4	3	2	20	6
0	168	892	5	145	263	7	16	0	0	8	26	2	13	10	15	19	7	4	130	117	6	3	0	630	7	4	12	2	2	22	1	1	0	0	18	12	10	0	32	41	0	0	195	192	5	6	3	42	6
0	183	851	8	129	271	29	63	0	3	8	14	90	16	7	12	20	7	7	126	127	24	9	1	574	14	0	32	2	62	21	0	0	46	10	17	44	27	1	35	56	3	2	170	204	3	4	0	29	5
0	157	947	5	87	142	18	16	0	0	14	20	45	11	10	8	23	6	4	69	61	9	2	0	577	1	0	13	0	33	18	1	1	20	9	16	20	12	0	55	62	2	1	94	114	5	2	1	38	4
0	163	884	5	132	217	29	30	0	0	7	22	18	14	13	20	31	6	5	140	96	16	6	0	580	4	2	24	2	18	24	0	0	7	3	11	31	26	0	52	56	0	0	144	189	3	6	2	48	0
4	138	881	5	150	249	35	52	26	12	9	19	38	13	5	11	29	11	6	134	95	27	8	0	569	9	2	44	1	25	8	1	0	16	6	10	38	30	19	68	59	1	2	176	181	2	4	1	18	7
4	145	837	3	133	258	36	75	21	27	8	24	37	18	8	8	19	4	15	99	107	29	12	1	557	13	0	47	1	22	15	2	0	23	7	7	50	38	24	39	65	3	0	147	190	1	4	1	27	5
3	195	949	5	98	172	19	45	15	27	8	17	84	17	10	13	24	8	22	95	53	17	5	0	628	32	5	20	0	45	24	5	3	54	16	16	28	19	18	61	55	2	1	126	116	10	15	2	34	5
2	136	934	4	159	266	38	59	17	22	16	14	55	10	10	17	25	4	5	163	114	25	11	1	695	5	2	41	1	45	29	0	2	23	6	13	36	36	17	52	63	1	2	180	228	5	8	2	34	11
0	124	822	4	167	272	16	31	1	3	12	16	101	18	5	6	16	8	6	175	153	11	6	1	554	0	1	17	2	59	9	0	1	56	19	7	26	17	0	70	73	4	1	222	224	8	4	1	12	4
0	154	834	2	156	282	8	29	4	2	11	16	80	13	9	26	20	2	4	187	156	9	3	1	505	2	3	16	0	57	30	1	1	52	17	23	15	15	1	43	48	3	3	215	224	1	3	1	51	5
0	180	929	4	136	296	4	11	2	2	12	35	43	12	8	10	28	7	6	169	130	3	2	0	578	2	2	6	1	35	19	1	0	30	5	13	5	8	2	60	82	0	3	193	226	0	3	3	31	3
0	192	738	2	125	280	23	34	0	0	18	22	96	10	9	11	26	6	15	147	130	13	4	0	509	3	6	17	1	54	20	4	1	54	26	9	27	24	0	58	61	4	0	181	214	7	3	2	32	3
0	206	875	6	176	328	28	61	7	10	11	31	0	11	9	16	29	11	4	175	136	23	15	3	520	2	1	34	0	9	27	2	2	1	0	14	39	33	8	63	76	0	0	250	241	0	4	3	40	5
7	224	882	3	156	298	20	43	21	18	11	18	0	12	5	8	19	13	7	158	131	15	8	0	579	2	1	27	0	6	17	1	0	0	2	8	21	29	27	67	90	0	0	224	198	1	3	1	16	5
3	193	544	8	169	284	17	32	26	13	9	28	81	18	11	19	30	7	7	153	105	14	5	2	382	1	0	25	0	50	33	1	1	51	14	14	19	21	22	84	91	5	3	222	197	3	5	3	48	4
0	133	726	5	135	304	5	13	3	3	11	20	160	12	15	17	31	12	7	158	117	3	1	1	529	3	1	3	1	103	21	3	0	104	25	9	9	4	4	77	87	9	1	196	208	5	4	2	43	2
0	194	908	4	164	311	61	71	0	0	10	28	48	11	9	11	27	6	9	160	133	44	12	0	672	4	6	66	0	34	19	3	1	35	12	11	52	47	0	63	65	1	2	225	232	3	4	2	29	5
0	247	885	2	143	290	23	39	4	3	9	17	85	12	10	20	23	11	17	128	132	17	6	0	552	0	0	27	3	56	28	4	0	47	12	16	26	26	3	50	51	3	2	195	193	6	3	2	51	5
0	222	568	5	137	264	31	51	3	4	15	18	2	10	11	11	34	6	7	130	122	22	9	3	445	3	0	34	0	5	22	0	0	1	0	13	40	25	3	81	70	0	0	205	194	6	0	3	34	3
1	215	867	2	165	292	21	43	22	28	5	8	79	20	9	12	10	5	5	152	127	11	9	1	593	1	4	30	1	51	21	0	2	54	10	11	27	27	12	22	30	3	4	195	226	0	4	0	23	4
1	181	847	5	119	223	30	56	10	6	10	7	70	14	12	13	15	7	7	122	86	25	9	0	517	8	2	36	0	51	19	0	1	45	10	9	50	22	5	40	49	2	3	165	168	2	8	3	29	10
1	125	831	4	159	289	30	45	7	5	6	16	228	13	5	6	29	8	7	161	132	21	10	0	539	0	0	31	1	140	6	1	0	153	48	11	40	29	2	71	79	9	2	193	247	10	6	1	10	5
0	202	630	3	152	286	14	20	0	0	9	7	137	12	11	6	22	5	4	162	138	9	6	1	446	3	3	15	0	73	18	0	1	86	31	10	22	16	0	70	63	6	2	213	211	3	3	2	25	4
0	204	845	6	154	271	7	10	3	2	3	13	52	11	10	19	16	7	3	144	131	1	3	2	559	0	0	3	0	39	21	2	1	30	7	15	9	3	4	48	40	1	4	171	195	7	1	0	37	4
0	150	886	4	131	223	25	36	2	1	5	20	48	6	8	8	19	9	6	155	111	22	7	0	575	2	1	32	0	36	15	2	1	30	8	12	31	21	1	56	60	2	0	178	179	8	6	1	32	7
2	191	846	6	145	257	28	48	15	10	6	8	15	9	10	16	23	6	4	142	110	22	11	0	469	9	1	32	0	13	25	0	0	12	1	18	23	35	13	61	58	0	1	185	201	3	3	1	45	2
3	148	783	5	141	296	21	26	27	21	8	17	81	13	12	9	23	10	7	144	109	8	6	2	400	11	4	18	2	46	21	3	1	50	17	10	26	11	12	67	60	2	2	202	185	3	12	4	47	2
1	206	749	8	142	268	14	34	22	22	6	12	117	16	13	17	16	10	7	135	88	8	8	0	545	0	0	12	0	92	43	1	0	76	25	25	22	16	11	46	50	3	3	167	168	3	2	0	49	2
1	247	689	2	149	295	21	27	9	1	7	13	85	10	8	14	25	4	3	161	90	11	7	0	441	1	1	24	0	54	22	0	0	62	13	11	23	18	2	53	83	3	4	186	221	8	2	0	32	5
2	195	479	9	127	252	26	54	2	3	4	12	30	15	10	12	17	8	9	119	99	21	11	0	406	5	3	42	2	29	23	1	3	16	9	10	35	27	0	72	59	2	0	175	181	5	4	3	30	7
0	209	747	3	142	296	19	16	4	1	5	20	16	18	9	18	19	6	9	127	93	10	5	1	528	6	4	15	1	14	26	1	0	12	4	18	23	13	2	47	59	1	0	165	192	4	5	3	41	6
2	243	888	0	148	284	32	54	13	14	9	14	79	7	7	12	14	13	13	131	115	25	6	0	607	1	0	38	0	53	23	2	0	48	8	14	41	22	13	57	60	1	3	188	191	3	7	0	34	2
3	197	876	3	168	315	25	54	23	6	6	24	48	8	9	14	26	8	9	139	99	23	11	0	512	7	0	38	2	38	22	1	4	26	8	9	29	23	15	66	72	0	2	187	196	4	8	0	26	4
1	192	798	8	149	249	3	15	3	1	5	15	54	6	7	15	19	6	13	152	76	2	4	2	519	3	1	4	2	32	26	2	3	31	14	15	8	4	1	50	65	1	1	182	181	6	7	4	42	9
1	188	885	5	117	190	46	79	1	4	8	10	87	5	9	14	16	11	8	90	79	38	19	2	472	0	0	57	0	52	25	0	1	52	16	15	49	47	3	27	50	6	2	127	123	4	4	3	44	5
0	193	894	8	138	241	8	18	3	1	15	21	16	9	7	8	20	8	11	118	102	6	4	0	488	5	1	13	1	11	15	1	2	8	4	8	16	9	3	53	75	0	1	194	172	5	5	3	30	5
1	171	705	6	39	76	9	15	2	2	10	28	45	4	9	23	20	10	9	33	28	6	4	0	327	2	1	16	1	27	27	3	1	27	10	19	17	8	0	52	66	1	1	53	49	4	10	1	50	9
3	192	760	6	121	231	26	29	13	14	15	16	8	7	8	15	13	10	9	113	99	13	16	1	486	5	1	37	1	3	15	2	3	1	0	13	28	19	15	56	59	0	0	167	160	2	3	1	35	2
0	209	823	2	144	262	0	1	10	9	7	20	31	12	7	12	24	11	10	126	105	0	0	0	485	4	0	0	1	21	13	2	1	15	5	11	6	0	5	59	72	2	1	183	185	6	5	3	21	6
3	206	749	3	152	259	18	32	27	17	5	13	34	11	8	14	13	5	6	134	81	15	3	0	443	4	3	21	0	20	31	2	0	24	3	13	22	20	11	31	41	1	0	191	175	3	9	2	47	8
2	185	714	2	140	249	6	10	15	9	3	18	67	6	9	17	17	7	4	122	86	8	2	3	457	1	1	8	1	46	27	4	1	40	11	11	13	2	14	55	49	2	3	181	159	4	8	1	32	6
0	146	839	7	88	187	10	24	2	3	7	19	69	9	8	8	23	10	6	107	77	6	5	1	538	25	1	11	2	40	18	1	1	49	12	11	19	10	4	53	55	1	2	139	130	3	3	1	30	7
0	169	701	1	49	102	58	99	2	2	5	29	76	7	4	11	21	11	8	55	38	46	20	0	454	3	1	73	2	37	15	2	3	47	4	11	63	54	1	81	71	2	1	70	68	6	5	1	17	8
0	206	768	4	117	240	48	81	0	0	10	24	30	14	7	9	24	6	13	110	80	28	18	0	442	0	2	58	1	24	26	3	2	18	1	15	57	50	0	73	85	1	1	170	154	3	6	0	25	9
2	90	789	3	99	204	18	46	17	14	7	18	192	9	12	15	23	8	5	112	85	16	10	0	444	0	0	29	1	109	23	0	0	112	35	10	24	27	15	46	84	3	8	151	139	7	3	1	42	3
0	213	740	5	127	242	18	33	0	0	7	25	94	3	8	9	21	8	7	122	92	13	5	4	444	1	4	21	2	73	14	1	1	48	16	8	18	22	0	66	55	4	2	181	146	4	3	1	14	6
3	219	766	4	122	209	8	16	14	21	9	21	2	9	11	15	18	5	3	109	88	6	1	1	446	2	2	9	3	4	29	0	0	5	0	13	10	10	11	52	61	0	0	156	166	6	6	1	41	7
1	169	616	3	139	221	18	40	12	17	4	17	144	5	8	17	26	11	6	113	86	21	6	2	377	1	1	28	0	74	30	2	1	79	19	11	29	21	11	49	79	6	6	168	123	3	4	0	40	6
2	125	709	9	87	162	4	7	5	12	8	22	92	11	10	11	19	6	5	82	80	3	1	2	492	0	0	1	0	48	19	1	0	39	17	8	13	9	6	54	61	2	4	121	116	3	6	3	20	8
0	135	663	6	116	255	6	11	1	2	9	21	54	12	11	14	27	6	4	104	80	5	0	0	495	4	5	4	1	26	25	1	0	24	8	14	7	5	1	77	84	1	1	163	153	4	4	0	36	5
0	125	895	3	116	264	15	47	2	4	6	20	94	9	9	9	23	7	8	109	93	18	5	1	528	5	4	25	2	54	15	3	0	61	20	12	32	16	0	56	55	2	2	180	148	4	9	2	34	1
0	133	756	4	128	234	5	7	7	15	13	21	57	11	6	8	23	5	5	113	90	2	2	1	446	2	1	3	1	37	17	1	1	27	5	8	13	3	5	59	65	3	1	160	145	4	0	2	25	4
3	155	570	1	108	216	5	8	17	17	6	23	106	4	10	18	25	4	5	104	72	2	1	2	362	1	1	2	2	61	31	3	0	66	17	22	14	2	20	60	52	0	2	142	131	4	6	0	53	4
0	159	745	2	140	270	11	13	3	6	9	16	60	9	13	9	18	7	16	140	72	7	4	3	437	3	2	16	1	34	21	4	2	24	11	11	18	10	8	38	48	2	2	196	144	4	3	2	31	10
0	118	612	1	133	221	12	9	7	5	9	19	75	5	13	15	30	6	9	105	61	8	7	0	356	0	0	14	0	44	28	4	2	44	11	16	22	3	3	72	89	3	0	146	145	1	2	1	45	4
1	168	760	6	141	257	12	26	1	1	10	17	93	12	10	11	25	10	9	113	78	9	5	3	473	3	1	23	1	57	24	5	2	61	17	11	16	16	0	53	64	1	6	147	166	8	6	2	36	5
0	186	639	3	126	262	45	81	3	1	8	20	117	10	9	20	26	8	9	116	60	32	12	3	389	1	3	51	0	58	31	5	0	67	13	10	65	46	3	77	75	3	2	153	152	1	5	2	47	7
0	208	609	8	124	218	17	37	1	1	11	13	34	6	9	12	19	9	9	99	68	14	5	1	373	9	0	20	2	16	13	4	1	23	5	8	33	18	1	54	58	2	0	137	144	4	10	1	40	10
0	207	691	3	40	73	7	7	12	5	6	11	2	1	8	2	15	5	3	32	23	3	1	1	427	2	0	4	2	3	13	0	1	0	1	9	9	1	6	33	40	0	0	56	49	5	2	0	26	10
6	223	685	1	8	19	14	22	18	17	7	11	113	0	17	14	26	9	6	6	8	9	5	1	440	4	0	8	3	54	35	0	3	76	23	21	17	14	16	55	56	4	3	22	18	0	7	2	51	8
1	182	645	1	109	232	18	34	8	10	5	14	64	15	11	6	24	5	8	116	85	10	10	0	424	2	1	22	0	47	20	2	0	42	10	13	25	17	11	47	61	1	2	159	159	2	5	1	29	8
1	211	694	1	123	258	12	25	4	4	9	14	52	10	10	10	19	6	7	134	72	14	4	0	460	0	1	14	0	28	16	2	2	39	9	14	18	15	2	39	60	1	3	145	172	5	3	0	33	2
0	187	711	4	98	228	4	10	1	1	4	9	56	9	4	13	26	10	6	100	69	6	1	3	385	2	4	7	0	32	16	1	1	29	7	12	8	3	1	72	66	3	3	122	143	7	6	1	21	9
0	191	577	2	149	369	3	8	5	3	3	6	38	11	5	4	15	12	4	137	98	4	3	0	350	5	2	8	1	24	8	1	0	16	8	7	7	4	3	34	31	1	1	205	188	5	9	2	11	5
1	227	504	6	134	262	0	0	6	2	9	9	79	9	11	20	21	8	3	101	63	0	0	0	375	4	2	0	0	57	38	0	1	56	20	26	8	0	2	45	44	3	2	140	139	3	3	2	44	7
1	182	481	1	134	311	16	20	4	13	4	9	23	10	6	7	22	5	9	129	88	13	4	1	331	6	3	16	3	9	21	1	2	9	1	12	16	12	10	54	75	1	0	190	155	2	2	1	30	3
4	99	613	1	114	190	18	17	25	17	1	19	65	8	5	4	19	10	10	85	53	10	3	1	471	2	1	13	1	35	6	5	2	41	15	10	24	10	17	56	57	1	3	130	110	4	6	0	18	5
0	156	566	3	108	220	6	4	2	5	6	11	15	12	7	17	12	5	8	101	56	4	0	0	433	3	0	2	1	12	26	2	0	8	4	17	12	6	5	35	42	0	2	125	130	2	3	0	50	7
0	208	672	1	62	141	10	18	0	0	6	11	34	3	11	13	29	5	5	57	39	6	4	3	468	3	2	12	0	16	41	2	3	28	5	20	19	8	0	69	80	0	0	95	76	3	3	1	45	7
0	191	426	7	246	448	4	11	3	5	9	14	82	16	4	13	16	4	8	149	130	5	2	1	320	1	6	7	3	40	22	1	2	37	9	4	9	9	4	55	47	1	3	243	232	2	3	0	33	4
0	198	587	4	143	271	17	38	0	3	6	11	18	13	5	13	16	7	10	107	77	10	5	1	447	1	2	28	2	14	17	0	0	13	3	6	33	17	1	54	54	0	1	169	162	4	2	2	23	3
3	188	686	4	100	171	4	9	19	18	2	11	69	4	7	10	22	10	5	95	71	1	3	0	507	0	0	5	3	38	16	1	0	49	14	12	11	6	25	65	57	2	2	134	127	3	4	1	42	2
2	199	645	1	109	193	16	38	17	14	2	10	81	10	11	10	17	3	7	106	69	10	9	1	531	14	3	18	2	39	17	1	1	53	6	16	31	11	14	60	58	3	1	135	139	3	4	2	38	4
1	200	722	3	69	107	14	24	19	10	9	9	96	4	5	7	23	9	8	63	41	13	3	2	498	6	4	15	0	45	16	0	0	58	20	9	15	18	15	57	47	2	1	57	91	7	7	0	23	7
1	198	526	4	103	174	18	36	16	7	8	9	86	10	6	15	13	7	9	110	77	16	7	0	386	15	5	27	2	43	13	1	0	54	18	11	15	21	12	48	45	4	1	135	134	5	6	2	28	5
3	170	573	3	88	177	29	38	16	12	3	9	275	7	7	20	13	7	14	97	76	17	10	0	397	3	1	27	1	176	38	2	1	180	60	13	36	20	11	41	43	8	12	144	133	3	10	1	47	3
0	165	558	3	94	183	37	78	20	14	0	9	83	8	8	11	11	14	12	102	76	23	16	1	430	6	4	47	3	49	18	0	2	60	15	10	45	39	15	41	41	3	1	123	136	4	10	0	35	8
1	183	597	2	83	176	3	9	8	7	6	10	142	12	8	7	24	10	12	86	65	4	2	0	405	5	2	7	2	86	20	1	0	86	23	12	9	4	3	70	71	6	1	105	128	10	4	1	24	9
1	174	595	1	211	377	9	25	3	5	5	7	0	19	13	8	22	7	10	159	128	6	2	2	444	10	0	11	2	3	20	1	2	0	2	11	22	11	2	63	59	0	0	235	204	1	5	1	35	7
2	151	645	0	142	244	6	24	16	14	5	15	86	13	4	12	16	13	8	127	70	10	5	1	398	5	2	12	3	53	18	0	2	54	17	11	24	8	11	55	58	2	2	147	174	8	6	1	30	6
3	133	533	2	85	206	9	17	9	11	6	12	52	6	6	15	22	14	9	104	58	8	2	2	394	4	1	12	0	32	24	1	0	34	14	12	13	11	8	42	71	3	0	127	147	8	5	2	30	11
2	116	719	4	186	334	12	12	4	5	3	5	172	11	9	9	27	11	11	131	112	9	3	3	498	4	1	15	1	94	20	3	4	109	28	11	18	8	1	80	65	6	3	201	190	13	8	2	24	5
0	171	562	2	180	334	0	0	0	1	9	11	34	8	5	9	15	12	16	132	88	0	0	0	448	2	0	0	5	13	15	1	2	11	4	6	5	0	0	42	50	0	1	184	197	11	14	1	19	2
0	168	494	2	242	497	23	63	2	3	10	6	116	10	7	8	9	10	10	183	143	20	12	2	407	9	3	47	3	62	14	5	2	59	16	12	46	21	5	41	41	5	1	272	239	4	4	2	25	8
13	165	385	6	208	464	18	34	30	24	8	3	158	13	6	14	18	6	13	163	109	19	6	1	304	1	2	23	0	97	25	2	1	103	19	10	28	17	31	37	51	8	3	227	225	9	4	1	35	5
3	127	507	3	177	387	39	60	18	15	7	8	50	5	4	7	11	5	7	141	141	22	6	1	353	5	1	39	0	34	13	2	0	26	6	4	44	32	15	41	37	0	3	259	194	8	5	1	17	3
2	141	477	3	164	341	0	0	13	10	3	9	18	16	10	11	19	3	6	124	96	0	0	2	342	0	0	0	2	13	26	1	1	13	4	11	9	0	10	55	61	0	1	206	173	2	0	2	37	5
1	158	339	3	129	269	15	35	1	7	8	11	19	7	6	10	5	7	3	115	75	14	3	0	269	0	0	22	0	10	26	2	0	7	9	8	20	15	1	53	57	2	0	154	157	7	6	2	22	7
4	135	347	3	148	313	18	47	20	15	9	10	150	8	4	5	12	7	7	119	72	19	6	1	310	0	0	28	2	94	9	0	1	108	19	6	28	18	14	51	63	5	3	177	180	8	2	1	9	5
3	152	505	4	168	331	2	14	11	13	8	17	16	8	11	4	15	6	8	106	80	5	0	1	397	1	1	2	4	16	22	2	1	7	3	9	9	4	8	52	52	1	0	191	178	8	7	0	26	6
1	154	550	4	123	299	50	82	11	6	7	11	54	15	9	10	21	9	11	109	90	32	18	2	416	0	0	46	2	30	17	0	1	30	9	9	52	47	9	66	45	0	2	186	150	3	2	2	35	5
0	150	464	1	53	123	61	93	1	5	6	6	16	11	7	18	25	7	11	59	42	36	19	0	336	0	0	56	1	16	30	2	0	8	2	9	56	44	1	74	64	0	1	80	90	2	2	0	51	5
0	115	483	1	14	33	39	85	4	4	6	7	33	3	2	7	21	9	8	13	12	41	13	1	366	2	2	61	1	18	14	1	1	20	3	7	68	22	4	59	52	0	1	27	26	2	6	1	21	6
5	133	436	4	74	132	37	79	19	29	3	11	90	6	4	10	14	5	6	67	45	40	9	1	347	0	0	49	2	51	23	0	0	60	14	9	46	33	19	41	43	2	0	94	101	6	3	0	33	8
3	160	408	7	113	220	60	144	23	16	9	11	71	8	4	3	21	8	16	95	60	57	21	1	364	1	0	83	1	37	10	2	0	41	14	6	69	57	9	61	73	2	2	155	146	2	10	2	15	7
0	119	489	3	221	461	7	9	1	1	7	6	99	13	13	8	15	11	11	152	124	6	1	2	371	5	2	6	1	45	30	1	2	53	11	11	11	4	0	41	55	1	4	233	245	7	12	0	36	3
0	142	467	7	184	406	37	67	6	3	4	13	69	8	8	4	9	6	15	134	85	34	17	0	342	0	0	45	3	30	12	1	1	32	8	8	42	41	2	47	56	0	1	259	211	6	8	2	18	5
1	142	426	4	144	329	59	126	12	20	4	11	60	16	6	12	9	9	14	132	108	54	28	2	315	1	4	72	3	32	19	1	2	36	7	12	86	46	13	59	49	2	1	200	199	8	8	1	23	7
2	126	374	4	103	191	27	73	9	9	4	4	107	8	5	9	9	5	12	63	43	24	13	1	297	4	0	34	2	50	23	1	0	68	21	11	40	19	7	66	49	3	3	124	111	8	7	2	33	5
0	145	204	3	175	363	34	54	6	7	1	4	142	9	8	6	20	7	9	133	87	19	14	1	190	3	3	30	1	78	19	2	0	94	14	8	29	32	2	54	53	2	5	196	203	9	4	0	18	3
0	154	354	6	167	363	43	88	3	3	2	10	55	11	9	5	13	8	15	122	71	39	15	1	368	5	3	51	6	36	18	5	0	34	8	8	55	32	0	47	55	1	4	199	183	6	11	1	21	4
0	161	299	6	174	388	28	66	6	1	3	14	65	10	4	6	13	6	4	137	85	22	14	2	249	1	0	24	1	38	15	2	1	29	8	9	41	19	0	38	41	2	0	212	190	5	4	1	18	5
0	178	393	5	132	337	15	42	4	1	7	2	36	9	9	8	10	8	6	110	88	17	7	1	283	4	2	20	3	26	23	0	3	17	4	13	23	18	2	36	37	1	1	169	171	10	11	0	32	2
5	156	329	4	130	296	21	44	15	13	4	13	88	9	3	4	12	10	5	107	64	22	13	1	227	0	1	20	1	52	13	1	1	59	16	5	37	16	9	35	44	1	4	158	158	8	7	2	15	4
6	184	508	4	134	278	29	71	24	12	10	18	51	11	11	17	17	19	12	109	75	28	8	0	427	0	0	38	6	35	36	4	0	31	11	12	47	28	11	50	52	0	3	177	131	11	18	2	57	5
4	148	335	4	135	369	22	54	28	29	8	11	37	7	5	5	21	13	10	127	92	24	4	4	280	5	0	33	1	20	15	1	0	23	7	2	31	21	14	56	55	1	1	205	185	5	4	1	20	5
1	129	428	4	84	197	14	24	12	8	4	12	37	8	5	9	16	12	16	79	36	10	6	1	373	2	1	16	2	25	20	2	2	25	5	9	25	10	5	48	55	2	0	117	98	14	9	1	24	3
0	146	416	1	43	81	3	12	1	5	3	16	21	7	8	9	12	17	16	37	19	3	4	0	346	4	3	7	2	13	34	0	2	8	3	8	8	2	2	35	35	0	0	53	57	11	12	0	40	5
0	155	380	5	86	191	10	19	2	2	8	7	72	7	3	12	10	12	19	91	60	8	3	1	331	0	0	11	3	42	22	0	1	45	8	14	12	9	1	69	61	5	4	143	123	10	8	0	25	0
7	179	284	4	140	351	35	63	30	33	3	9	38	12	7	4	12	12	11	124	70	29	5	0	246	11	3	43	1	24	18	3	2	18	6	3	49	26	25	47	54	0	3	190	179	4	13	1	23	2
0	168	359	6	153	394	21	37	20	23	5	7	79	14	10	20	6	14	14	120	80	17	3	2	303	2	1	14	3	38	51	1	2	43	12	21	18	19	14	38	51	1	4	208	192	9	13	2	64	6
0	142	259	2	128	321	9	17	9	6	5	11	49	13	3	5	12	12	7	101	102	8	3	2	223	1	0	7	1	25	6	4	1	29	6	5	15	7	8	48	48	1	1	212	146	5	8	0	8	4
0	141	336	3	116	239	11	30	0	2	2	8	74	16	12	7	9	6	16	102	61	10	3	1	293	4	2	13	2	40	24	5	1	40	8	8	15	14	0	42	50	2	1	143	144	13	4	2	26	2
1	134	347	5	76	211	27	63	8	8	3	8	6	7	5	12	10	14	8	67	45	28	6	2	298	1	0	43	1	5	32	2	1	1	1	6	42	24	6	48	47	0	0	109	108	8	5	0	33	4
2	139	372	4	51	114	22	35	27	20	3	4	227	6	3	4	10	13	13	41	37	20	9	1	350	4	1	22	3	131	10	4	0	147	28	6	30	13	12	75	70	4	6	61	82	8	11	2	15	8
1	131	379	1	139	323	18	33	18	21	4	13	46	15	12	11	14	8	9	127	71	16	7	2	385	0	0	22	1	24	25	1	1	24	5	15	21	24	18	69	57	0	3	181	160	11	7	0	54	8
2	124	295	2	122	273	41	67	4	5	4	11	106	11	6	13	14	8	7	104	60	23	12	0	259	3	2	36	2	53	28	0	0	60	16	11	47	37	3	76	74	3	2	172	139	6	9	4	34	4
4	118	445	5	130	297	5	13	15	21	2	11	65	17	10	6	18	13	19	117	70	7	0	0	411	0	0	5	1	27	26	7	2	34	7	14	10	5	11	75	87	3	2	167	157	10	19	0	31	1
0	113	418	3	103	211	12	16	9	23	2	6	67	12	7	9	9	13	17	81	62	9	1	0	353	1	2	10	2	24	23	5	1	33	6	12	11	11	7	59	58	1	1	129	138	12	7	0	30	2
2	108	408	3	174	361	5	12	6	5	3	9	177	7	9	3	12	17	14	114	73	5	2	1	387	0	0	6	2	82	23	3	0	86	25	5	9	4	1	51	53	3	5	212	173	7	13	1	23	5
1	121	451	0	139	361	33	55	12	11	5	2	83	5	7	6	14	13	19	125	83	25	9	0	392	0	0	41	1	39	20	1	2	33	10	12	47	17	14	39	50	2	2	202	172	10	11	0	40	6
[truncated: 35 more columns]

## Sheet: cont PTX rep1
A5111	A5112	A6111	A7111	A7112	B5211	B5212	A6211	A6212	C6211	A7211	A7212	A8211	A8212	A5312	B5312	A6311	A6312	C6311	A7312	A8311	A8312	B5411	B5412	A6412	C6411	A7411	A7412	A8412	A5122	B5121	A6121	A6122	C6121	C6122	A7121	A7122	A8121	A8122	A6221	A6222	C6221	A8221	A8222	B5321	B5322	A6321	A6322	C6322	A7321
7	13	715	140	167	2	5	274	329	82	446	254	6	11	59	2	30	62	439	2	90	79	169	106	162	2782	33	81	583	43	457	13	8	28	21	657	1361	1525	255	21	16	115	2	10	219	123	281	792	0	3
6	12	664	137	157	1	2	273	344	97	485	222	6	6	49	1	20	65	446	3	83	76	137	133	174	2738	34	85	537	46	484	14	8	28	22	661	1323	1515	263	25	17	103	3	13	218	121	252	812	1	1
7	23	731	132	188	5	8	266	334	52	438	249	5	6	44	3	35	61	422	1	94	67	164	102	179	2690	28	90	544	41	457	15	8	29	27	611	1238	1511	260	25	17	115	7	13	230	127	258	783	2	0
5	13	744	135	235	3	5	256	324	70	535	280	3	9	56	2	27	62	416	3	87	65	156	88	159	2717	37	90	551	30	445	13	6	35	20	727	1439	1547	252	26	14	103	7	6	208	102	271	781	1	0
4	15	707	124	171	3	3	239	331	69	494	239	8	7	57	0	33	69	434	2	94	77	150	103	154	2890	27	82	529	26	441	13	9	25	23	642	1316	1578	241	28	22	116	5	7	196	108	229	761	0	1
4	15	737	137	175	2	5	259	302	74	558	245	7	3	49	5	26	69	428	2	88	79	151	109	139	2920	33	90	486	35	448	13	2	24	24	596	1369	1570	256	31	15	115	6	9	220	126	244	758	2	2
7	10	710	122	156	1	3	250	317	66	545	228	4	4	46	2	27	68	405	4	85	76	165	117	152	2865	31	76	559	29	448	8	11	27	24	580	1238	1533	235	19	14	96	8	6	201	92	248	762	3	2
6	13	721	134	180	3	7	270	326	58	579	239	9	9	49	4	27	68	410	2	88	70	150	108	137	2939	25	101	523	28	470	10	13	29	25	619	1296	1517	204	30	20	105	4	4	230	100	253	789	2	0
9	12	736	144	155	3	5	253	331	72	522	252	5	9	22	2	26	72	417	1	78	90	151	107	152	2716	28	92	492	31	447	8	11	18	22	605	1293	1589	253	18	10	109	8	8	204	103	259	747	3	3
2	12	721	140	176	1	4	259	300	59	544	231	7	11	41	1	34	54	406	0	80	78	166	115	145	2682	39	84	489	30	474	9	7	20	26	604	1298	1507	230	25	19	85	6	9	240	105	279	744	1	1
0	7	715	113	159	3	4	279	311	72	523	234	8	9	30	0	27	76	392	0	84	82	183	108	125	2603	28	80	465	31	480	9	11	26	26	576	1269	1504	232	32	14	104	6	6	226	99	267	766	3	1
4	17	715	151	161	2	5	247	337	71	571	240	4	7	51	5	31	62	391	1	83	79	197	109	163	2676	26	98	565	37	483	13	6	16	28	628	1312	1486	236	23	18	98	1	6	218	110	274	787	1	1
7	17	729	132	157	3	7	248	327	77	612	220	9	8	60	4	38	68	428	3	89	78	187	111	149	2797	27	90	538	40	458	12	4	27	20	619	1285	1539	223	21	22	116	9	10	211	102	308	774	2	1
5	14	714	138	163	3	6	256	359	63	572	240	5	8	48	2	26	62	413	2	81	68	149	107	160	2856	38	91	535	27	450	13	8	30	18	578	1321	1586	241	19	25	94	5	12	214	104	301	744	3	2
11	13	708	125	175	5	4	276	315	78	605	226	4	7	51	3	33	68	417	5	92	72	161	110	157	2845	31	96	570	42	470	9	3	15	25	608	1339	1551	246	28	16	107	9	8	240	89	285	770	2	1
3	18	697	122	157	0	1	213	331	78	528	209	5	5	49	0	39	59	437	0	83	81	179	130	143	2785	28	85	565	31	517	7	6	18	21	617	1256	1584	227	28	22	96	5	10	221	115	296	800	3	1
5	17	702	127	157	3	6	259	322	68	608	236	12	7	42	5	30	58	439	3	79	77	173	114	156	2873	32	102	510	30	475	11	11	23	30	619	1256	1459	221	29	21	98	9	4	224	114	356	780	3	2
8	14	743	131	198	5	4	238	302	88	742	259	7	11	53	6	33	68	417	2	81	73	178	120	139	2805	39	99	530	34	500	11	5	25	22	679	1316	1528	218	24	21	100	11	10	203	114	333	796	4	2
9	9	748	148	168	2	4	272	344	68	735	254	7	5	36	1	39	53	411	2	75	95	182	109	154	2759	28	96	548	36	492	14	10	18	20	594	1298	1613	214	21	16	101	9	6	212	122	336	758	1	0
6	6	696	139	156	4	9	244	330	78	751	235	8	6	42	4	35	56	421	1	61	92	181	106	155	2793	32	79	502	24	492	8	9	20	29	609	1276	1425	230	24	23	101	7	5	232	121	362	741	2	1
6	9	698	142	177	10	5	236	318	70	719	260	5	6	37	3	29	38	388	2	94	85	182	113	165	2750	31	106	545	28	489	8	3	26	30	642	1233	1546	225	25	25	101	6	8	226	108	370	768	1	1
9	11	660	132	175	1	8	250	319	62	865	237	7	12	53	1	27	67	395	4	85	87	196	107	152	2817	32	96	519	33	488	5	4	32	25	600	1246	1623	221	31	18	107	4	13	230	117	402	757	2	0
5	13	664	132	168	4	4	255	335	58	873	273	9	3	49	3	31	53	400	1	71	69	220	91	164	2653	23	102	494	33	480	8	10	22	23	577	1302	1467	202	24	18	105	10	9	202	98	401	741	2	1
5	12	660	146	177	1	4	293	311	70	692	230	6	7	43	3	28	59	380	1	81	69	205	98	156	2764	32	97	515	34	465	11	9	27	20	567	1303	1463	190	25	15	94	5	9	223	114	358	771	2	0
7	19	653	131	142	4	2	272	325	62	843	232	6	8	39	1	34	41	404	3	95	69	179	103	187	2725	31	102	543	41	494	14	9	26	27	571	1246	1519	217	30	15	87	8	4	234	116	419	745	1	1
7	13	609	147	170	3	1	306	308	77	847	256	7	7	57	3	41	55	397	0	83	58	185	106	148	2709	23	101	506	55	467	9	9	28	22	643	1265	1444	190	37	23	91	7	8	211	115	420	765	3	3
7	18	641	117	160	3	4	285	327	66	771	202	6	6	44	0	34	57	438	4	85	65	177	121	169	2830	25	96	543	42	472	7	6	23	27	630	1250	1497	194	30	26	98	6	10	228	98	388	770	3	4
5	15	628	123	162	2	8	283	360	64	752	235	10	8	37	2	36	64	374	2	76	88	223	99	153	2739	31	98	540	41	486	6	8	13	23	585	1224	1519	191	35	14	76	4	8	214	104	429	775	1	1
9	12	623	145	141	4	9	262	330	70	782	234	1	11	52	1	22	57	380	3	78	72	206	109	183	2673	18	99	557	38	521	7	8	19	21	601	1197	1578	192	21	21	99	4	12	232	125	384	778	3	1
10	13	623	121	151	4	5	282	322	68	684	211	6	4	47	0	33	63	365	2	76	69	194	117	160	2724	27	91	541	48	503	11	12	22	24	576	1173	1523	207	25	22	102	6	6	230	113	434	782	1	3
3	15	598	137	168	3	8	267	365	83	626	233	8	8	45	2	27	78	384	1	88	88	188	118	160	2769	21	109	564	36	515	10	10	25	29	624	1236	1575	213	30	22	89	7	2	237	113	436	772	3	0
4	11	540	134	135	2	7	333	333	75	549	217	5	6	43	2	38	56	390	0	73	78	199	106	146	2718	33	97	546	24	509	11	5	24	22	576	1221	1543	203	24	28	106	8	9	231	111	428	738	3	2
7	10	525	143	176	6	5	292	332	66	559	254	6	7	43	3	26	55	403	1	75	89	216	112	175	2757	27	112	535	25	516	13	7	22	31	654	1294	1533	215	26	25	93	4	10	218	127	469	744	3	3
2	18	578	139	158	0	7	300	325	54	595	227	3	6	38	1	30	58	378	2	87	89	206	111	189	2748	22	92	545	21	511	7	7	26	21	623	1234	1557	209	31	15	106	9	5	227	132	430	753	2	3
4	9	378	105	101	4	3	178	235	56	439	173	5	7	42	2	23	55	302	2	64	46	132	72	138	2135	15	79	391	21	374	10	3	26	14	430	872	1116	137	19	13	71	4	3	167	96	296	599	1	3
11	28	382	73	88	1	6	159	180	32	377	147	3	6	36	3	21	48	225	1	62	67	103	62	93	1479	21	60	384	34	229	6	7	15	13	324	867	930	136	20	14	60	3	6	97	46	199	494	1	4
24	56	727	154	190	8	4	279	341	68	831	323	9	10	76	2	35	93	451	4	140	143	229	95	202	2768	31	136	743	57	469	18	16	31	28	724	1941	2106	320	38	29	116	14	11	218	111	401	924	1	3
14	50	748	195	220	5	11	285	359	96	805	412	13	9	69	3	45	87	419	3	136	120	237	82	186	2781	48	153	793	59	501	20	12	35	15	741	2017	2186	268	38	30	120	16	17	204	136	380	969	1	5
18	48	744	179	174	5	5	295	325	59	875	333	15	13	73	2	36	86	403	5	131	129	220	99	229	2621	36	129	785	67	479	22	14	24	31	737	1894	2247	258	57	28	109	9	15	217	100	404	961	0	1
17	42	783	190	179	8	2	292	294	77	960	338	13	11	82	3	52	83	449	5	139	136	204	112	223	2827	33	140	808	72	467	18	15	25	28	718	2004	2378	294	37	23	125	15	11	216	112	373	933	3	2
24	40	693	211	172	8	10	278	288	108	907	374	5	11	77	9	34	67	497	4	150	158	220	102	195	2873	29	164	785	71	483	15	22	32	24	708	2032	2472	245	40	31	125	8	7	240	116	347	980	3	4
16	32	689	199	178	6	11	261	325	92	964	360	7	9	60	8	36	76	489	2	150	144	230	120	207	2858	24	172	878	70	520	29	16	47	25	804	2029	2633	233	31	26	145	6	5	230	141	378	1106	6	2
21	32	783	189	181	16	5	301	352	93	890	360	4	11	77	4	43	69	513	3	170	161	252	106	224	2895	36	139	891	58	521	25	12	41	29	759	2037	2577	252	34	21	157	5	13	259	120	423	1221	5	4
17	39	759	224	193	6	10	330	406	96	1022	357	10	16	80	5	30	70	497	4	154	151	247	107	228	2845	38	156	876	69	510	14	20	29	39	716	2161	2728	259	38	31	168	13	12	224	118	443	1275	3	0
19	37	792	214	192	7	8	306	398	107	1130	392	9	11	79	7	37	92	508	3	160	157	218	116	228	2782	44	155	958	54	498	21	18	34	22	793	2192	2847	291	48	27	153	16	17	213	118	421	1310	1	2
23	30	798	252	230	13	9	322	345	104	1225	414	9	16	77	4	44	90	524	3	150	187	241	115	216	2888	37	169	944	55	505	21	12	35	31	816	2348	2817	288	35	34	158	16	13	261	109	426	1236	4	2
13	35	713	284	228	9	10	283	349	128	1269	443	7	7	83	5	44	93	545	4	177	153	242	132	232	2937	46	187	1014	55	494	13	12	37	23	833	2349	2812	330	33	29	173	27	16	257	125	453	1110	3	3
23	38	763	265	267	6	5	318	354	119	1173	484	8	13	63	3	36	104	550	2	200	198	227	107	244	2910	34	179	1018	61	517	18	9	41	31	798	2435	3040	366	46	45	173	16	18	238	108	431	1105	1	1
13	29	783	252	223	5	9	314	341	123	1322	460	16	9	63	6	33	91	564	5	206	227	224	114	270	2951	40	174	1175	53	548	17	24	42	31	772	2435	3380	377	47	41	152	20	24	259	136	462	1153	2	5
18	36	688	243	250	7	8	282	326	111	1558	479	12	12	84	3	44	91	577	6	182	218	245	123	255	2937	42	180	1068	55	496	13	12	45	42	784	2401	3270	345	43	45	164	27	30	246	125	471	1034	8	0
19	34	773	233	233	9	9	269	323	118	1290	429	10	13	74	3	48	88	576	4	199	231	243	110	248	2978	32	165	1170	65	503	17	15	35	37	788	2247	3346	366	41	39	171	32	19	243	129	435	1053	1	2
18	36	752	230	222	5	8	264	307	109	1260	434	11	11	73	6	47	100	561	3	214	259	244	118	254	2916	40	162	1216	64	483	14	9	39	31	796	2235	3460	396	37	43	154	33	14	265	132	402	1025	5	2
15	41	768	234	217	8	12	280	301	122	1103	434	11	20	80	5	35	110	565	6	220	247	227	116	231	2817	37	155	1311	61	474	15	20	50	40	771	2181	3488	404	31	35	167	21	14	243	125	427	974	6	2
16	43	827	244	188	8	12	267	352	102	1248	409	14	17	64	7	36	83	574	3	214	226	262	116	261	2932	41	165	1179	63	494	12	17	44	35	766	2229	3334	391	49	42	159	35	23	221	165	428	1032	2	4
15	45	716	242	201	10	5	248	312	103	1080	419	13	13	71	6	33	99	590	2	205	239	228	117	261	2751	50	149	1128	56	497	15	21	41	41	738	2245	3386	313	32	33	150	32	21	251	140	446	924	2	2
19	38	819	234	215	5	10	258	316	106	1060	444	8	15	72	6	48	95	551	5	236	254	248	107	270	2744	47	164	1243	65	487	15	18	36	34	763	2331	3544	334	33	42	143	29	11	237	160	458	970	3	1
25	29	756	261	225	10	10	285	306	88	1131	462	11	17	76	7	32	89	537	6	224	240	242	117	248	2740	46	171	1210	64	513	17	15	35	38	786	2362	3371	320	38	56	144	24	19	246	135	419	987	4	2
11	49	734	248	204	4	11	259	295	115	1183	429	6	18	84	8	33	103	537	5	221	275	256	110	267	2779	38	153	1247	58	513	21	10	49	51	808	2263	3615	351	37	33	140	30	16	214	154	416	971	4	5
18	46	789	207	210	10	6	271	314	111	907	393	9	10	74	5	45	86	543	0	254	220	268	117	234	2775	45	134	1152	54	504	18	9	31	33	697	2137	3201	321	38	36	146	22	17	242	140	409	961	4	1
22	34	761	211	174	7	7	305	319	127	1062	396	8	16	91	7	39	93	582	3	213	264	218	107	255	2784	30	130	1281	59	509	8	12	46	49	731	2127	3475	342	36	43	153	24	8	240	115	420	982	5	1
19	40	751	207	200	14	7	303	321	116	1007	410	10	16	62	9	46	107	564	5	232	262	222	143	267	2845	33	160	1205	51	589	18	14	39	38	748	2018	3364	348	41	40	142	39	18	270	145	424	948	0	3
19	46	745	223	212	13	9	275	323	121	1055	418	7	11	62	6	30	110	552	0	214	254	277	118	239	2727	38	138	1144	62	555	16	11	45	31	787	2093	3349	306	49	38	152	23	18	246	174	438	923	3	2
15	45	748	209	180	6	11	295	318	116	2118	381	9	8	60	8	43	103	578	3	220	240	250	132	255	2868	34	147	1130	77	562	16	16	41	42	697	1996	3249	276	40	36	160	21	17	251	167	402	947	3	3
9	41	727	196	211	0	13	280	298	120	1323	416	9	7	59	9	36	93	567	1	240	261	246	140	243	2794	39	147	1207	70	528	12	15	37	39	772	2115	3379	350	50	40	148	27	15	234	167	399	895	3	3
16	34	749	195	187	10	7	242	316	117	1094	379	7	9	69	9	28	121	604	5	217	254	243	131	260	2755	48	138	1160	59	575	12	17	44	35	717	2032	3233	316	53	38	158	23	19	249	170	409	927	5	1
20	38	679	189	227	1	6	273	341	111	1211	382	12	17	69	10	36	99	592	5	203	243	239	135	238	2789	40	146	1092	56	543	15	14	54	32	754	2104	3167	292	42	50	148	18	16	240	208	401	897	5	5
17	41	649	200	176	5	10	257	297	124	1070	376	8	15	74	9	41	108	569	1	215	237	257	148	229	2767	46	143	1096	65	586	18	17	38	46	725	2078	3154	320	35	34	139	22	20	236	199	397	827	8	4
22	36	756	205	199	4	11	268	308	114	1058	413	6	13	70	2	49	90	551	4	223	267	262	141	258	2799	29	161	1157	68	505	20	15	50	33	746	2110	3313	322	53	55	156	33	9	218	166	402	849	1	1
8	37	811	209	197	6	9	274	288	113	1170	386	8	13	73	7	45	92	548	5	213	271	243	137	237	2663	41	159	1209	51	542	12	15	46	37	747	2089	3283	348	43	50	143	25	18	249	163	399	838	0	2
17	37	730	209	189	6	5	259	293	125	1259	385	11	6	66	5	43	102	571	3	216	262	251	132	231	2706	42	152	1118	64	553	18	7	41	35	790	2149	3160	324	43	42	139	27	16	249	164	397	844	4	1
20	38	756	206	204	5	4	262	326	114	1233	387	10	18	66	7	42	106	530	4	210	270	245	153	243	2639	50	148	1147	57	557	27	10	55	37	772	2012	3260	301	41	53	150	29	15	234	160	409	886	5	2
9	30	709	197	190	2	6	281	320	119	1008	364	7	10	60	2	45	88	577	3	221	220	214	154	264	2737	42	150	1075	55	553	17	12	38	64	723	2026	3187	297	42	55	153	26	9	233	175	420	848	2	2
15	32	701	191	187	3	3	283	310	103	986	357	15	7	60	3	43	117	565	3	224	248	263	146	234	2555	48	151	1155	44	540	25	7	33	36	712	1984	3225	322	40	45	142	31	18	236	152	424	864	2	0
4	36	746	213	207	3	9	265	310	117	1139	419	14	14	61	7	57	92	579	5	211	265	225	154	238	2490	49	149	1142	55	540	19	13	44	43	787	2129	3276	293	42	49	157	22	14	226	165	418	824	4	4
7	37	694	213	184	2	5	293	339	99	981	367	9	12	54	4	48	84	550	4	212	235	238	134	264	2525	39	137	1177	35	522	23	7	46	32	747	2026	3232	291	33	63	144	23	19	240	153	464	851	4	3
9	35	759	193	155	9	7	280	332	99	1025	329	11	17	75	5	49	79	550	5	208	244	214	137	241	2550	49	128	1249	45	548	12	18	32	49	694	1943	3371	296	38	49	151	31	17	215	166	456	794	5	1
18	32	796	198	166	3	2	310	343	94	823	340	11	12	81	5	46	50	523	6	192	221	240	123	230	2445	46	137	1154	55	553	16	9	43	40	699	1919	3336	350	54	45	148	17	18	247	123	418	893	3	3
18	33	732	188	190	2	8	309	280	108	826	354	8	7	82	3	42	74	595	3	198	243	218	155	247	2406	44	145	1149	45	538	21	12	36	34	690	2000	3311	330	33	60	150	19	14	230	147	432	845	3	3
4	28	760	210	178	6	4	256	317	106	906	374	10	18	69	5	40	74	547	5	195	235	216	144	248	2459	50	124	1097	50	572	15	14	52	43	758	1996	3145	331	42	59	142	22	13	218	130	445	830	3	5
20	16	766	186	183	3	5	277	338	106	875	389	7	19	58	7	38	64	569	2	208	252	265	120	251	2334	56	144	1202	46	540	15	21	35	32	698	1980	3342	359	33	57	142	30	16	230	131	437	789	2	4
15	26	786	213	178	6	8	239	316	92	844	383	3	10	55	5	44	63	557	1	198	222	241	115	230	2260	39	145	1033	51	538	14	12	32	34	687	2003	3061	297	43	39	128	20	14	217	125	418	842	2	3
14	22	762	185	169	4	7	269	281	101	890	343	10	9	66	4	36	65	567	6	217	233	245	130	222	2365	49	120	1141	55	555	21	15	42	30	714	1909	3147	305	41	42	141	20	8	217	137	429	810	0	2
14	30	726	222	168	2	5	256	302	98	1073	375	7	11	67	2	39	73	592	5	208	241	234	132	248	2460	41	143	1169	49	542	19	10	48	35	752	2048	3359	274	43	51	147	31	11	215	143	433	830	0	4
13	30	714	181	177	4	7	279	284	114	840	371	3	17	58	6	46	64	554	8	174	210	206	123	263	2317	41	131	1094	58	506	18	13	50	27	719	2048	3033	327	34	47	139	22	15	211	147	419	759	7	3
12	29	696	192	188	3	5	237	318	99	940	363	8	16	68	9	44	76	578	10	191	248	255	134	221	2391	47	129	1086	39	553	19	13	37	30	728	1984	3093	359	41	52	149	26	18	215	138	406	728	1	0
20	32	676	198	178	3	6	241	328	120	863	344	7	11	74	5	48	81	587	4	211	222	252	131	252	2358	44	134	1079	43	531	14	10	27	35	702	1989	3029	317	33	44	150	28	20	224	126	422	703	3	2
15	33	720	182	160	4	5	240	296	119	883	376	12	11	54	5	33	74	587	6	198	212	253	115	276	2401	57	139	1068	38	529	16	14	37	45	657	2001	3046	303	38	38	149	20	12	223	107	421	642	9	2
12	29	680	191	163	2	3	256	294	95	871	368	8	14	53	1	35	67	586	4	187	196	249	135	249	2281	34	152	1114	34	528	11	14	39	36	761	1971	3033	299	33	51	123	27	13	226	119	459	636	7	6
18	43	737	201	161	4	3	267	297	99	897	331	14	13	46	7	47	64	571	6	183	212	228	150	235	2309	45	144	997	37	530	11	16	33	36	758	1843	2950	306	46	36	133	19	13	222	135	396	723	3	5
12	28	779	215	180	4	6	257	316	111	1309	407	8	10	55	7	35	67	548	1	161	218	253	132	242	2344	41	161	1050	41	531	13	11	41	42	744	2040	2900	341	46	49	136	22	16	230	108	417	693	5	1
16	25	713	189	173	4	8	248	330	98	862	373	11	17	72	4	36	64	568	3	170	189	249	141	232	2347	42	151	979	53	504	17	13	42	27	715	1974	2778	299	28	40	136	19	11	219	126	418	688	4	2
14	31	645	182	155	3	6	252	284	97	1272	313	4	18	61	8	51	80	548	6	165	199	249	141	245	2333	37	140	994	54	537	15	16	36	39	706	1880	2687	318	46	35	151	16	9	233	115	384	709	1	2
20	41	723	178	186	2	4	261	315	74	1025	320	5	26	67	5	42	71	554	8	172	188	245	126	245	2240	47	127	982	56	522	16	8	42	26	723	2003	2782	319	38	59	144	16	8	234	97	392	688	0	3
18	44	711	188	157	4	7	232	323	96	784	326	10	15	64	5	33	68	570	8	137	195	235	153	255	2228	26	138	948	42	509	10	18	42	44	681	1900	2638	324	42	51	153	19	12	232	96	428	677	1	0
19	21	651	212	151	1	2	278	283	84	813	366	13	9	55	4	47	84	561	1	176	217	250	123	211	2382	38	170	925	44	514	10	11	41	37	667	2032	2658	335	34	54	141	18	10	225	111	394	678	3	1
15	27	699	200	170	5	2	245	273	92	991	339	9	14	55	5	49	54	524	2	169	184	241	116	237	2228	48	150	974	45	504	14	12	38	45	637	1949	2636	285	38	54	136	13	11	212	123	371	637	5	2
16	40	659	190	194	2	7	253	271	82	921	341	4	8	48	6	49	63	546	3	150	211	244	157	259	2320	43	155	1028	44	488	15	6	43	38	650	1922	2636	302	40	48	133	16	9	237	106	377	673	4	3
14	26	649	190	170	4	8	239	299	108	745	353	8	12	63	1	47	53	555	6	165	185	238	134	249	2233	37	144	954	52	525	18	16	39	40	707	1904	2534	275	34	39	133	19	19	239	108	414	666	5	1
15	40	674	198	167	4	4	237	292	94	1109	308	10	7	54	4	38	75	570	6	167	182	232	125	246	2151	28	136	965	43	514	8	12	32	47	624	1939	2589	302	35	48	150	19	12	250	101	426	610	4	4
11	37	714	177	157	3	5	254	272	95	715	310	4	16	46	6	60	64	584	7	145	197	241	126	253	2185	25	152	975	43	536	12	9	32	41	631	1881	2468	351	25	66	137	13	15	223	117	417	594	4	3
11	44	658	198	164	1	4	258	293	90	745	339	10	10	52	2	52	81	605	2	144	179	242	132	234	2178	35	154	893	37	496	19	9	45	36	682	1906	2455	289	37	54	123	15	12	240	115	444	585	3	0
10	30	638	210	171	3	7	229	308	85	817	354	10	13	60	12	55	81	575	1	136	199	232	143	236	2094	50	161	898	50	507	20	17	37	35	662	2002	2478	301	37	47	136	15	12	223	100	391	635	2	4
12	24	664	183	162	6	9	243	309	79	703	360	5	12	52	7	48	66	641	6	154	184	218	113	239	2034	40	154	917	41	510	23	12	34	41	694	1932	2619	299	21	62	130	20	10	237	85	415	711	1	2
9	26	654	182	157	6	2	256	276	72	1168	354	8	9	58	7	50	87	667	4	144	188	214	137	259	2066	44	141	933	52	526	12	7	50	33	707	1930	2511	279	41	49	124	15	8	238	102	375	660	5	4
13	32	637	171	172	4	5	230	291	82	712	342	11	14	48	8	53	73	655	7	148	160	226	126	246	2056	44	154	962	49	523	17	15	27	45	667	1959	2511	280	28	58	140	18	6	211	103	376	702	4	1
19	24	648	185	182	3	3	226	298	70	1781	377	9	7	46	2	47	69	712	7	137	184	232	123	261	1897	35	150	952	30	484	15	12	35	38	716	2055	2506	265	26	39	114	21	12	237	94	371	708	1	1
15	28	609	175	149	6	9	243	278	71	715	340	11	7	48	4	45	76	677	6	122	180	226	117	272	2127	49	137	962	39	505	18	17	33	39	715	1724	2438	229	36	46	135	16	11	219	86	372	686	3	2
10	28	624	182	140	5	3	244	298	68	1142	315	9	6	48	9	55	81	695	6	141	179	207	116	240	2053	51	145	932	50	513	10	9	42	45	653	1877	2574	263	25	35	131	22	17	228	100	390	615	4	3
12	27	634	208	150	7	8	249	294	75	1124	336	9	6	44	2	40	74	694	8	175	161	219	123	267	2097	40	148	984	34	539	17	9	41	28	672	1865	2537	331	24	41	132	16	10	227	87	344	653	1	0
14	21	580	201	152	5	7	264	279	67	1061	315	7	9	45	5	46	87	695	8	153	162	220	111	253	2001	40	146	862	60	523	14	7	47	36	646	1903	2301	274	26	35	129	15	7	224	94	380	602	2	2
15	26	644	192	180	5	6	244	287	88	1389	340	12	13	35	3	53	85	736	3	133	156	233	96	254	2029	39	154	849	54	472	17	17	42	31	701	1873	2385	259	29	47	129	17	13	198	97	393	639	2	1
7	17	559	195	188	10	5	245	265	72	1668	351	4	8	52	4	52	76	740	3	146	180	202	102	265	2151	49	151	968	52	478	17	12	46	35	696	1922	2479	303	32	54	134	22	16	197	98	401	644	4	2
15	31	600	187	167	3	7	232	267	69	1152	345	6	4	48	8	42	85	684	3	139	151	192	104	241	2022	42	131	893	47	452	15	11	40	35	685	1861	2345	272	31	39	135	18	15	186	106	373	587	2	1
13	33	667	196	156	5	6	230	272	81	1680	321	8	10	42	5	50	70	689	5	157	145	215	133	264	2209	51	139	935	54	489	13	10	37	54	685	1814	2487	259	30	41	132	21	5	178	121	404	576	3	6
10	23	624	202	139	3	6	236	298	71	1142	294	8	14	53	4	52	77	619	4	148	154	211	105	231	2111	39	143	893	48	447	17	9	41	37	685	1798	2327	298	40	34	129	14	9	174	128	382	623	1	1
7	24	587	176	169	4	5	236	288	81	1147	310	7	12	45	3	58	73	590	2	149	167	209	95	271	2137	22	141	880	47	465	21	12	37	42	640	1739	2417	277	27	40	148	16	13	181	109	393	620	2	1
14	21	574	186	165	2	9	249	256	79	1130	315	5	10	34	6	64	73	638	4	144	157	214	94	230	2083	36	140	881	49	440	6	15	31	37	649	1806	2361	290	36	43	133	19	9	189	89	404	563	1	2
12	21	619	197	167	6	3	236	290	86	1261	333	8	6	47	5	49	81	656	3	133	154	196	110	247	2148	47	144	932	45	443	18	9	39	42	693	1930	2422	278	45	35	140	14	6	184	94	376	662	6	3
13	23	576	172	177	6	3	229	304	71	891	300	4	11	42	4	49	93	637	2	128	160	217	100	246	2067	55	139	829	53	441	8	8	45	38	675	1773	2293	236	31	48	144	21	14	185	105	385	632	2	2
12	23	581	181	174	5	2	223	285	75	1218	360	5	13	39	9	52	73	604	2	135	150	202	115	256	2048	50	144	867	42	443	15	11	41	37	727	2034	2293	255	24	46	159	27	12	172	99	373	639	2	1
5	21	588	191	152	3	5	237	290	58	1327	331	7	15	43	3	60	68	590	5	116	163	171	115	231	2106	45	127	893	55	448	6	19	35	36	632	1802	2311	251	26	40	137	23	8	182	95	385	641	5	1
14	24	556	176	166	3	5	227	286	61	966	339	12	15	31	6	49	92	632	2	147	151	201	109	256	2040	37	149	860	52	431	9	8	37	34	629	1842	2389	264	36	46	139	14	14	182	103	379	654	2	2
8	25	541	171	156	1	9	230	308	70	688	308	6	10	40	8	46	83	592	5	125	148	202	104	269	1999	41	141	843	56	398	10	8	38	24	612	1833	2278	232	35	29	123	14	6	186	97	439	587	1	2
16	25	557	166	171	3	4	222	297	78	810	311	12	11	37	3	56	64	620	3	129	152	209	119	281	2096	51	122	830	48	487	9	7	37	37	690	1809	2174	280	37	36	140	17	12	197	112	397	562	0	3
9	22	550	145	148	2	11	206	294	84	927	276	8	10	43	2	43	80	625	1	128	149	220	118	224	2203	44	125	824	48	439	7	8	34	33	606	1809	2238	268	43	37	142	15	12	208	113	433	560	2	3
13	21	581	157	140	4	5	219	298	73	720	285	9	12	35	3	52	82	616	3	141	161	204	125	284	2041	41	128	857	38	437	12	9	35	30	607	1717	2319	250	35	43	130	18	5	200	108	384	648	2	2
11	21	600	185	182	1	5	209	306	79	1786	312	6	8	30	5	53	67	621	5	146	139	203	128	285	2125	51	128	918	50	461	11	13	42	31	659	1912	2332	281	45	44	143	19	10	210	103	367	699	1	3
7	24	609	170	158	3	5	263	275	72	851	297	5	7	45	5	46	92	606	3	132	158	226	122	299	2012	41	131	884	51	471	9	17	39	41	647	1805	2338	254	24	46	133	23	11	218	108	349	726	3	2
11	22	639	190	150	2	6	236	269	78	1426	283	7	9	41	4	53	80	577	2	139	184	218	141	255	1977	46	124	912	38	472	8	14	39	33	636	1823	2474	297	30	39	132	19	9	221	114	369	685	3	4
11	22	561	190	174	0	7	223	281	79	1394	305	10	10	27	3	57	78	567	2	175	152	219	124	243	2030	53	126	912	43	484	13	13	36	28	615	1757	2432	259	31	43	129	18	6	227	104	345	678	6	0
12	24	579	192	171	3	5	225	304	69	1327	283	12	11	34	7	55	65	559	2	145	154	229	109	265	1940	38	131	855	33	471	10	19	41	30	646	1841	2360	298	34	57	129	21	11	208	104	369	660	2	1
8	29	604	166	163	5	3	212	295	70	645	293	7	9	24	6	57	84	628	4	121	181	262	92	240	1964	53	132	880	37	426	17	12	28	29	619	1655	2354	243	39	47	122	23	12	190	104	371	711	3	3
11	12	591	158	152	0	1	207	304	70	663	268	9	6	57	5	65	84	560	3	121	163	173	133	252	2086	55	122	771	43	414	7	16	34	29	615	1671	2215	240	39	31	133	22	7	197	107	366	701	2	1
7	22	652	172	134	1	9	203	309	65	627	295	10	11	41	4	51	75	525	3	151	165	210	119	253	1974	54	119	873	35	427	6	11	28	27	625	1686	2295	268	40	40	125	16	10	172	116	382	672	1	0
9	19	554	171	151	2	6	250	277	67	589	284	10	11	33	7	48	87	507	6	150	160	206	114	216	1981	52	121	857	38	402	11	16	40	40	626	1712	2322	255	42	45	140	21	7	195	106	422	617	5	0
10	25	563	192	162	7	4	236	299	73	677	291	5	13	34	3	59	92	484	4	131	154	221	106	239	1959	57	127	807	46	459	8	10	32	29	585	1843	2270	212	39	41	135	16	7	200	102	406	626	1	3
14	18	528	168	174	3	2	246	311	83	646	305	12	10	32	3	51	70	468	5	131	162	176	122	239	2117	41	127	806	44	456	6	10	33	30	595	1830	2260	248	33	33	142	23	7	182	118	408	538	4	0
9	21	545	166	148	4	4	218	307	65	615	248	5	6	39	6	49	78	446	3	130	139	198	120	244	2130	49	128	823	47	432	8	14	31	34	626	1622	2277	255	36	45	154	22	4	199	117	405	593	1	1
12	29	536	166	147	3	1	241	296	63	634	272	10	17	40	3	47	87	492	6	134	143	205	103	261	2030	58	111	777	35	493	11	8	27	19	635	1740	2229	225	29	34	152	12	11	173	98	425	546	1	3
16	17	529	165	156	3	7	245	274	55	821	285	10	13	31	3	41	77	495	3	119	162	218	131	222	2035	47	135	853	41	459	12	9	32	31	561	1797	2317	275	38	31	136	19	3	183	118	441	508	3	3
14	29	551	169	150	1	8	231	286	77	632	271	5	11	38	7	59	75	541	3	129	157	195	132	226	1987	50	118	827	53	448	10	11	33	29	580	1627	2317	235	32	21	121	25	8	182	113	441	503	5	3
8	24	564	187	167	2	7	222	285	73	754	289	6	10	30	2	46	65	505	2	154	149	199	125	249	2086	44	131	837	45	411	13	15	27	31	654	1825	2274	267	43	40	145	15	7	209	116	439	524	3	3
12	17	586	172	170	1	8	224	305	68	639	264	7	8	30	4	58	70	460	3	117	157	198	116	250	1935	54	120	805	38	419	15	13	39	32	597	1686	2317	258	31	40	120	21	9	194	106	417	566	1	3
11	18	553	179	145	3	8	230	305	86	642	305	8	10	16	5	43	75	437	3	127	155	199	130	253	2062	46	121	820	39	405	11	11	38	26	581	1693	2274	260	43	37	151	22	11	189	118	405	615	0	0
15	21	546	186	143	2	2	222	282	73	629	268	2	7	30	8	39	75	441	3	147	149	213	109	259	1847	44	112	814	55	396	10	9	21	24	584	1742	2383	236	41	24	133	17	4	202	99	423	585	3	1
16	27	544	149	143	2	7	212	331	62	644	249	11	3	32	6	43	88	436	4	133	125	203	109	267	1884	52	110	807	50	406	16	6	36	37	596	1690	2265	232	41	33	140	11	7	197	111	439	582	1	0
9	16	525	177	168	2	2	224	308	77	658	276	15	10	28	3	46	79	438	0	156	164	218	112	265	2043	53	119	884	53	418	4	12	40	30	635	1783	2370	250	46	30	138	17	4	190	125	418	573	3	2
13	21	526	160	150	5	2	212	330	69	644	274	7	6	32	6	49	81	472	4	150	136	200	109	222	1980	43	118	812	42	433	18	9	26	29	573	1671	2366	249	44	35	141	18	12	181	109	422	546	2	1
15	14	545	168	155	2	2	237	312	70	605	264	6	15	29	2	40	91	467	2	112	165	214	115	252	2088	48	123	804	37	443	10	10	36	32	558	1787	2320	240	54	29	139	17	8	160	120	408	561	5	1
3	20	547	173	168	6	1	243	298	71	598	315	9	11	28	7	37	91	452	2	147	141	221	122	265	1936	50	121	919	43	458	7	16	30	21	585	1694	2407	248	42	22	155	17	5	175	112	430	547	2	2
11	19	538	171	128	3	6	229	304	60	545	257	7	10	25	5	45	74	409	6	160	149	217	117	250	2035	52	119	918	50	403	9	7	33	36	581	1706	2447	262	38	30	137	20	8	178	124	415	577	1	2
10	25	519	156	171	5	2	238	282	80	532	291	7	11	31	1	44	81	409	5	144	147	172	127	225	2034	48	125	880	42	417	11	10	35	27	599	1651	2355	238	42	29	156	16	4	173	105	413	559	1	4
11	11	561	143	157	4	8	230	294	68	561	277	8	13	22	4	49	100	437	3	132	146	222	102	289	1920	48	113	898	47	448	15	12	36	23	585	1565	2349	224	45	27	129	20	4	185	106	418	521	0	2
3	14	503	170	149	6	2	228	287	68	603	303	10	7	26	2	45	87	413	2	145	166	225	106	239	2048	47	120	900	60	445	12	4	31	20	587	1716	2316	241	45	28	134	20	5	183	106	414	496	1	3
11	24	494	152	127	7	7	244	288	82	536	252	8	9	27	6	32	87	385	2	130	155	214	116	234	1968	54	106	851	49	447	12	9	35	21	573	1594	2287	251	43	32	152	15	6	180	102	424	528	0	2
6	14	519	169	136	3	3	212	292	78	971	252	6	8	23	3	42	62	443	4	160	146	245	135	248	2245	51	111	857	38	479	5	8	32	33	563	1668	2374	251	55	28	143	21	6	192	117	396	498	2	3
8	26	475	164	140	4	6	210	306	62	571	247	8	11	35	7	34	71	362	2	154	149	206	153	257	1938	51	108	919	45	446	15	13	23	28	628	1539	2448	258	43	28	115	18	8	204	110	419	501	3	2
7	22	527	136	146	4	8	208	304	65	578	228	6	16	16	8	32	85	336	0	144	165	216	119	241	2075	51	104	950	40	472	8	14	34	28	567	1604	2461	259	38	19	121	16	10	205	108	423	498	4	3
11	17	540	176	153	6	4	235	285	55	655	278	6	7	19	4	32	83	387	6	130	161	235	134	256	2070	49	111	834	41	473	9	10	31	26	618	1707	2275	221	45	31	136	17	6	213	108	412	491	2	2
8	21	525	161	150	15	5	227	310	56	568	281	4	12	23	3	38	84	313	5	158	141	213	131	230	1922	55	109	890	37	482	16	8	31	27	591	1566	2434	220	44	28	132	20	5	184	109	446	429	2	1
11	15	532	144	148	6	3	268	256	47	580	290	4	11	24	6	38	84	324	4	151	150	205	129	238	1909	51	112	954	37	484	10	10	31	20	597	1642	2452	222	39	18	122	18	6	192	119	402	488	1	3
12	22	536	182	140	11	4	227	294	55	566	288	5	9	31	7	44	79	311	4	142	149	225	147	223	1906	43	116	853	37	491	14	3	25	18	587	1699	2378	234	43	31	109	15	7	197	129	413	505	1	2
8	23	489	166	127	7	2	254	265	49	551	280	6	13	21	3	39	76	318	2	148	169	227	118	234	1940	49	109	901	46	503	14	11	40	23	604	1629	2371	220	41	30	112	18	5	213	120	435	447	0	1
17	14	537	170	151	6	7	251	291	73	1238	300	4	7	22	6	40	75	375	5	154	160	214	118	229	2191	47	124	927	44	480	14	11	39	40	555	1748	2390	238	44	24	117	19	10	203	107	444	455	5	0
8	21	494	145	123	8	2	233	295	61	551	239	6	12	17	3	35	93	299	3	162	151	236	121	201	1924	42	94	969	38	479	16	11	28	20	582	1505	2505	234	36	12	110	7	4	194	111	418	439	3	2
8	22	528	168	134	7	4	221	292	67	616	283	9	9	24	6	37	77	337	3	144	144	222	139	217	2104	42	99	902	39	473	11	13	31	33	567	1634	2393	193	47	17	118	20	4	176	114	443	432	1	2
9	18	521	158	145	1	3	224	293	62	510	263	5	11	21	7	36	79	305	4	133	154	203	121	201	2136	33	109	880	51	465	17	13	22	27	605	1562	2398	211	42	30	125	17	6	205	103	405	454	2	3
7	20	519	201	136	5	3	278	280	66	552	257	8	10	27	9	39	98	325	1	135	157	229	127	197	2100	39	106	901	40	488	6	10	14	27	591	1683	2352	215	57	22	118	20	4	218	118	445	420	2	0
4	12	531	176	135	4	4	242	280	63	564	245	6	10	24	5	39	98	331	2	144	153	234	113	224	2106	34	102	895	50	468	6	8	30	19	566	1640	2310	215	55	30	113	22	12	197	120	397	488	2	0
6	16	543	174	134	3	4	228	297	57	590	238	4	8	19	5	42	99	348	3	155	171	219	127	245	2090	48	109	923	40	473	10	8	32	22	590	1543	2417	268	50	20	123	19	7	190	131	429	488	3	1
7	17	550	153	159	6	3	214	307	62	520	268	6	9	24	7	35	83	310	2	147	147	208	104	234	2147	51	102	955	53	452	10	14	30	26	568	1609	2415	200	43	19	97	14	11	182	124	398	450	2	2
6	18	515	164	133	1	5	265	275	68	535	238	8	7	24	2	50	81	347	5	150	137	227	116	238	2087	38	99	906	48	477	7	6	25	26	568	1498	2345	209	64	19	114	15	6	192	136	435	480	2	4
6	17	531	157	127	7	2	256	273	62	484	261	10	12	20	8	36	76	322	1	150	149	264	117	225	2101	40	114	917	43	512	9	8	38	20	551	1553	2340	199	41	20	131	15	13	187	126	445	449	1	3
8	22	505	161	128	1	3	257	263	62	475	245	5	17	21	3	42	71	338	3	135	155	209	112	245	2118	45	94	806	47	459	15	3	21	27	575	1463	2244	192	53	23	112	16	4	189	121	418	459	3	3
6	11	522	157	148	4	2	236	279	69	686	269	12	11	13	5	49	115	330	1	139	195	230	112	250	2166	34	105	905	57	507	8	12	25	30	582	1498	2398	223	52	27	111	16	8	198	130	426	478	2	0
6	21	511	154	121	7	6	246	266	63	525	226	4	7	22	8	39	84	353	1	173	156	205	121	229	2163	33	109	1004	59	487	15	6	39	24	548	1503	2509	206	53	20	129	16	8	206	127	409	475	3	1
10	28	565	161	120	5	4	247	280	71	580	224	4	8	19	9	51	89	313	3	152	165	243	111	239	2064	48	96	1009	55	511	17	14	26	33	600	1502	2484	223	48	20	126	16	7	199	120	418	498	2	1
10	16	541	141	118	4	3	267	298	65	490	220	4	11	14	4	39	77	355	3	192	169	212	113	237	2100	38	107	1093	52	493	10	9	31	30	587	1405	2699	222	45	17	136	9	5	197	108	433	473	0	1
8	22	528	162	138	6	3	250	300	66	563	232	8	6	22	4	36	65	319	1	174	143	203	116	227	1952	43	108	1009	53	517	8	12	19	26	578	1481	2476	246	52	26	131	13	5	183	95	422	479	1	2
12	16	493	160	119	8	3	238	290	54	467	279	6	10	16	2	38	83	349	2	182	151	229	115	214	2084	43	103	1006	37	495	8	16	25	28	591	1442	2435	213	43	24	132	20	7	190	103	412	444	1	1
17	24	533	167	123	1	9	238	300	52	510	259	3	12	23	7	41	93	365	4	178	163	227	117	227	2265	39	100	1020	44	491	13	10	37	27	574	1431	2518	235	42	21	140	11	10	200	122	442	442	2	1
11	19	566	137	153	5	5	237	287	56	523	239	4	5	18	8	40	85	331	2	164	137	214	133	210	2029	38	105	906	44	504	12	12	31	28	613	1388	2372	189	43	21	112	18	10	202	128	406	472	0	3
13	19	518	154	124	2	6	235	306	82	520	246	7	6	20	4	37	96	345	1	157	166	233	104	235	2133	46	97	981	45	510	10	9	32	33	559	1342	2472	191	56	15	135	20	4	184	121	413	451	2	1
18	23	558	153	128	5	4	262	319	67	517	251	3	10	24	9	35	86	348	2	183	160	237	111	219	2159	32	102	1048	53	506	9	7	39	28	625	1346	2619	242	65	22	135	13	6	221	93	391	519	3	5
12	22	528	134	136	3	8	236	272	62	626	231	5	5	20	6	43	90	364	3	156	162	236	120	215	2169	42	94	926	56	512	7	10	41	27	604	1382	2455	164	34	22	135	13	4	192	131	401	425	2	5
13	24	498	163	145	3	6	228	289	53	987	247	6	10	18	7	30	95	371	4	180	175	251	125	200	2216	37	104	1013	51	525	9	8	30	29	589	1448	2578	208	51	24	137	15	3	207	108	417	427	1	3
12	20	530	166	116	1	5	210	301	67	545	255	4	9	26	11	37	103	356	3	190	176	261	107	198	2281	40	98	1060	57	510	11	5	30	23	590	1402	2748	216	60	20	128	20	8	207	110	362	508	2	2
13	18	503	155	141	4	4	236	281	60	574	235	8	7	23	7	28	76	311	4	147	159	231	113	211	2064	41	103	988	55	509	9	9	34	36	627	1385	2650	173	39	24	119	12	11	194	124	358	506	0	2
11	24	457	139	120	3	5	228	307	76	516	220	8	3	20	7	36	95	375	5	140	153	254	115	243	2254	32	92	995	52	548	4	12	34	39	626	1299	2514	186	39	18	123	15	5	213	114	376	515	1	2
11	24	532	144	138	8	5	263	266	70	535	232	10	6	15	5	34	85	376	3	192	162	240	133	233	2318	43	97	992	52	557	7	10	37	21	623	1419	2736	188	53	18	115	12	4	203	116	390	514	2	2
9	26	486	129	136	3	5	236	271	75	635	236	6	9	21	8	39	86	361	1	176	192	236	136	214	2351	37	82	1040	49	530	9	9	35	31	595	1314	2675	207	47	30	129	18	11	213	102	393	499	4	1
12	27	500	188	118	5	4	219	250	73	735	264	2	4	13	6	37	86	357	4	168	172	269	95	231	2274	34	102	1002	55	499	7	4	28	35	628	1400	2617	230	39	23	115	13	11	199	126	404	497	2	0
14	28	571	149	135	2	3	256	296	60	766	241	3	6	19	7	38	87	371	2	165	190	258	107	260	2326	36	113	1094	53	552	7	11	26	25	598	1294	2694	221	54	17	127	15	10	212	120	433	481	1	2
14	20	530	160	117	2	2	245	271	69	477	238	12	10	24	6	34	113	344	2	159	181	251	143	241	2206	30	110	956	51	549	6	13	27	25	636	1289	2559	202	52	23	131	19	13	201	123	432	471	0	1
11	20	537	146	134	5	7	244	273	71	509	256	9	3	17	6	45	82	374	2	174	169	251	130	239	2372	47	95	991	50	546	9	13	35	33	626	1387	2504	251	47	25	130	11	10	229	108	449	477	3	0
12	23	555	155	133	5	7	260	293	69	546	250	4	11	14	8	30	98	383	3	190	188	252	120	250	2246	49	108	1086	46	555	3	13	30	29	609	1360	2739	224	48	14	129	17	8	221	112	424	499	0	1
6	20	545	171	117	2	6	260	301	82	523	262	3	12	19	8	54	89	388	4	159	157	253	124	229	2406	31	96	1010	62	567	1	7	31	34	593	1288	2543	207	40	26	115	14	5	221	111	408	478	5	1
6	34	522	150	129	1	2	242	271	63	576	233	5	6	15	4	40	101	385	1	158	177	272	115	210	2321	35	91	1091	38	520	6	7	26	54	618	1267	2661	233	48	21	116	19	4	233	105	405	499	3	4
7	26	520	157	126	2	2	277	285	89	474	264	3	9	16	13	38	96	421	4	142	170	281	114	200	2454	36	92	1013	57	540	4	12	34	32	603	1301	2528	199	55	13	113	18	4	223	117	450	509	3	1
5	19	526	167	143	1	5	242	287	69	560	257	3	6	12	5	40	70	414	1	178	161	253	126	197	2442	53	95	991	56	562	8	12	35	29	654	1315	2579	207	49	21	134	13	8	189	105	425	494	1	4
5	28	575	173	134	2	6	271	292	69	708	245	9	6	14	9	39	81	382	4	144	140	258	138	238	2421	44	88	1022	59	538	11	11	44	24	665	1311	2429	209	54	28	119	12	9	190	125	471	466	2	1
6	14	528	163	112	5	6	256	300	90	510	230	1	9	19	10	39	84	430	2	160	172	271	151	229	2487	47	89	1096	46	565	8	5	39	34	609	1234	2604	224	53	22	125	20	8	219	119	428	493	5	1
4	23	550	154	108	1	5	214	285	80	592	220	4	11	25	15	26	89	379	3	139	178	259	116	235	2391	45	84	1047	48	543	9	8	31	28	615	1314	2525	209	41	14	135	14	1	195	130	417	487	1	2
10	16	520	158	121	4	5	256	262	82	613	244	2	7	17	8	38	82	405	1	159	144	249	122	232	2394	49	77	1074	51	532	6	9	50	44	702	1265	2457	214	54	23	145	13	3	211	106	450	473	1	0
4	14	496	170	136	1	7	257	276	82	549	242	3	8	17	10	42	92	388	2	151	152	251	135	208	2385	40	90	1099	51	541	9	7	38	34	623	1380	2545	220	49	20	136	13	4	214	87	462	438	3	3
5	18	516	145	125	2	4	275	276	94	457	259	4	6	20	10	36	105	435	3	142	146	288	109	200	2516	43	87	1050	45	577	5	6	35	33	635	1282	2452	178	49	11	137	13	7	223	111	456	462	3	3
6	14	520	139	118	3	7	252	277	71	502	222	3	10	17	12	39	101	417	3	151	152	257	112	204	2471	40	83	1077	55	507	3	9	46	34	685	1196	2429	240	56	21	139	10	3	216	116	478	480	3	1
10	20	557	139	118	9	9	265	305	78	456	220	5	7	25	9	44	96	432	1	165	149	250	115	207	2444	32	90	1125	65	558	11	6	44	43	652	1200	2514	203	48	8	143	21	11	213	106	476	493	0	2
13	7	537	159	107	5	7	253	303	77	490	224	5	12	25	14	43	85	423	4	169	164	274	109	211	2443	47	91	1057	53	523	9	8	37	39	651	1237	2497	214	53	12	143	14	3	224	107	489	465	2	1
8	19	523	160	125	2	5	268	285	82	474	252	5	11	19	5	36	81	448	2	156	158	250	121	211	2498	30	89	1179	52	522	8	8	45	33	636	1239	2445	213	45	21	138	8	6	221	96	436	484	2	1
2	27	527	157	125	2	10	271	305	69	567	269	6	7	16	7	34	102	421	3	139	147	264	96	211	2364	41	108	1115	52	554	8	11	36	38	664	1323	2454	192	68	9	131	15	3	218	116	493	430	1	3
8	17	564	153	123	5	4	288	288	66	522	237	4	9	23	3	49	95	419	1	136	157	285	141	219	2528	35	99	1115	61	598	14	6	37	36	631	1309	2486	211	54	18	125	14	7	235	100	509	442	3	5
11	21	561	161	116	2	5	285	278	68	519	219	3	12	18	12	28	85	443	0	155	156	271	138	208	2632	36	95	1053	60	557	12	12	50	43	658	1212	2526	210	64	17	126	14	6	240	117	460	449	1	2
7	20	521	154	150	5	5	251	317	70	623	246	6	8	12	10	35	98	454	1	139	146	261	127	212	2516	40	86	1115	60	525	6	7	32	50	684	1234	2562	201	71	12	134	11	7	219	118	467	441	0	1
10	22	557	160	130	3	10	236	279	57	577	225	3	4	13	7	36	85	430	5	145	156	236	128	195	2484	32	103	1124	57	581	8	6	32	37	667	1320	2520	203	49	21	134	11	10	211	125	450	451	0	0
7	18	548	146	108	5	3	253	289	78	679	253	2	3	23	8	41	75	433	2	143	147	271	111	219	2505	33	87	1045	58	569	7	12	47	33	626	1208	2410	176	63	12	139	12	7	219	112	455	437	2	1
9	14	528	170	128	4	3	243	278	76	747	268	3	6	13	7	43	90	490	4	151	152	267	129	216	2632	47	102	1121	58	565	11	7	38	29	717	1340	2526	195	57	22	119	6	5	224	117	452	419	3	1
6	15	536	162	135	7	14	263	281	69	605	268	7	7	22	7	39	85	503	5	157	163	269	105	192	2683	52	88	1159	71	574	7	5	32	49	750	1340	2655	200	60	23	146	19	8	192	103	456	471	1	3
7	19	571	158	120	3	4	277	282	72	686	242	7	6	17	10	38	88	424	1	166	139	258	123	201	2504	47	104	1104	62	525	19	15	36	25	669	1365	2498	189	62	16	120	17	4	197	123	482	463	1	2
8	17	501	146	140	2	9	287	303	79	537	239	3	8	12	20	42	90	486	2	150	145	277	110	221	2742	36	94	1121	58	514	13	9	41	31	695	1300	2529	196	63	12	124	11	5	214	98	472	460	1	3
8	15	552	148	140	6	3	240	312	83	530	261	1	12	14	7	40	83	450	1	133	130	261	135	228	2714	29	104	1057	53	571	9	7	37	37	707	1325	2383	171	51	17	139	15	4	220	115	506	457	1	0
14	14	557	144	106	4	7	273	322	90	579	231	7	6	14	10	49	78	416	3	139	146	255	113	230	2595	49	84	1034	53	554	13	11	45	23	648	1304	2437	178	58	24	133	23	7	223	117	461	464	2	1
9	24	510	153	132	6	6	280	298	79	643	243	6	12	11	13	29	73	422	1	137	163	263	116	211	2602	39	83	1152	48	548	13	12	39	37	658	1274	2517	194	63	18	134	11	4	205	117	479	423	4	2
10	23	514	149	125	2	2	254	281	99	584	228	8	11	18	6	38	79	502	3	146	171	253	138	189	2680	47	94	1143	47	573	12	10	46	35	665	1269	2596	209	52	15	155	16	6	208	105	482	430	5	0
5	17	490	154	123	4	8	265	307	88	508	250	6	4	23	6	31	74	479	1	145	144	249	145	216	2673	39	97	1126	70	574	15	15	36	42	649	1353	2549	190	55	18	131	9	5	214	111	481	408	4	1
10	17	483	150	116	5	9	223	286	78	505	212	6	5	8	6	43	85	477	0	146	146	263	145	212	2565	32	92	1084	72	536	14	12	41	42	639	1281	2500	191	56	17	153	13	7	211	121	411	437	2	0
6	21	492	149	114	2	5	263	293	97	523	235	9	14	14	12	36	76	494	3	163	151	280	117	240	2661	45	91	1142	53	565	19	9	39	47	653	1274	2544	189	48	21	139	25	11	204	110	420	463	2	2
4	8	547	156	121	7	8	270	294	87	501	250	2	12	15	12	33	91	483	3	106	160	256	126	210	2635	35	101	1013	61	563	7	11	45	42	739	1294	2469	153	49	17	156	16	8	213	117	459	477	0	3
10	15	494	175	130	3	8	239	305	91	556	223	9	9	13	7	45	67	493	3	149	152	261	119	193	2648	34	114	1154	48	552	14	11	42	41	696	1375	2479	192	49	13	149	13	4	218	105	413	434	2	0
5	17	541	142	115	8	8	222	272	81	495	228	5	11	10	13	45	84	466	4	127	138	255	151	183	2587	36	92	1114	57	578	14	7	33	32	684	1199	2509	145	44	23	138	10	10	205	104	433	423	1	1
6	13	498	169	124	8	10	253	243	65	552	267	9	8	14	12	39	64	441	4	138	156	294	116	196	2537	58	105	1061	65	589	8	10	49	40	748	1376	2420	191	49	21	155	10	4	224	108	443	440	2	3
7	25	501	143	116	5	6	268	279	61	529	238	3	8	17	6	35	60	429	1	140	148	251	124	200	2481	34	103	1156	51	571	12	10	38	30	722	1265	2563	148	60	14	124	13	4	231	92	462	426	2	1
10	18	545	165	137	4	11	245	277	67	561	272	5	7	10	4	50	55	430	0	138	149	252	134	196	2387	41	95	1047	57	568	13	14	30	32	754	1331	2388	198	56	11	135	14	10	229	106	453	426	0	2
5	13	530	185	130	5	7	270	265	51	579	235	5	10	21	6	33	63	391	1	133	133	268	125	190	2308	41	98	1122	50	564	10	12	20	34	704	1321	2446	191	47	17	120	8	3	217	98	487	450	2	4
5	14	509	178	129	2	5	250	303	75	673	256	4	6	10	10	48	65	440	4	135	151	243	134	216	2555	39	98	1138	54	524	12	11	27	36	727	1312	2490	189	59	20	136	9	8	231	88	409	452	4	0
8	19	553	163	109	3	11	254	295	87	634	228	5	11	14	7	45	77	455	4	139	141	254	137	228	2615	43	95	1087	66	542	13	13	26	33	696	1314	2404	176	51	12	127	19	7	226	114	458	476	1	2
9	11	509	155	137	3	7	256	335	62	657	281	8	9	8	7	41	98	487	2	143	136	298	132	215	2767	32	109	1083	56	568	11	13	37	49	802	1355	2500	169	50	19	136	15	3	232	107	512	426	0	5
3	12	506	170	121	3	7	263	307	76	637	287	5	7	14	10	41	71	517	5	141	137	264	126	206	2971	36	118	1133	62	564	9	9	24	47	777	1330	2424	183	65	11	148	6	7	206	100	451	452	7	2
2	12	518	163	139	1	10	258	287	99	714	249	9	9	13	8	41	79	602	1	152	129	277	113	222	3099	50	102	1159	54	588	19	9	53	47	787	1360	2544	197	59	12	170	17	4	219	103	440	427	2	2
6	10	500	172	123	3	7	264	307	100	602	253	1	8	22	7	49	68	533	2	123	155	265	122	214	2806	40	110	1172	44	546	12	13	44	37	759	1323	2435	184	55	9	148	14	8	219	102	425	438	2	2
13	16	530	156	133	1	12	289	284	97	548	264	4	7	21	7	49	77	497	2	137	146	279	122	196	2750	39	101	1169	46	561	12	13	42	36	721	1253	2363	204	53	16	149	11	7	225	110	474	410	1	2
4	17	531	155	142	2	8	278	292	81	524	273	7	9	6	8	44	80	457	3	144	137	264	144	201	2663	35	107	1190	56	556	9	12	43	57	751	1284	2503	155	45	24	143	14	3	219	102	429	434	1	6
6	11	502	180	136	1	5	276	278	84	531	270	4	8	11	11	47	87	448	2	137	134	263	145	197	2509	41	97	1150	54	589	13	10	34	42	716	1354	2476	171	57	15	117	15	5	214	96	487	433	1	1
3	9	557	168	117	3	6	253	285	73	554	243	4	10	19	6	41	59	433	2	146	127	284	153	217	2541	32	103	1130	59	575	15	5	34	32	728	1260	2436	196	35	16	126	19	7	209	91	488	417	3	1
4	13	518	158	140	5	9	270	248	92	537	246	3	6	17	5	45	90	380	1	123	149	255	124	184	2547	40	106	1221	54	590	8	17	38	28	724	1358	2403	146	57	18	136	20	5	215	87	437	420	3	0
4	14	522	149	128	4	10	281	274	77	501	250	4	6	10	11	48	75	400	4	139	153	297	119	208	2404	36	92	1183	47	544	10	3	32	30	750	1294	2412	163	53	16	109	13	5	220	97	480	454	0	2
5	11	521	155	151	2	10	258	283	58	527	259	7	13	15	16	38	69	374	3	146	158	281	120	188	2474	28	115	1125	61	584	10	7	35	34	715	1334	2405	176	47	17	114	15	3	212	94	458	439	0	3
4	6	556	167	133	2	5	265	284	78	545	244	4	11	12	7	37	69	412	1	131	140	265	131	214	2752	34	98	1142	62	557	9	9	38	20	718	1340	2286	173	53	21	145	10	7	198	102	461	402	5	2
1	9	535	176	142	7	9	244	295	90	604	308	5	10	11	6	44	68	425	3	123	135	253	145	197	2743	37	103	1134	58	589	6	9	44	39	740	1407	2334	160	53	15	142	7	10	200	115	455	415	1	1
5	14	531	153	130	4	9	261	256	82	505	250	8	2	11	10	35	67	449	2	143	140	278	144	195	2897	37	93	1102	77	620	8	10	38	34	712	1248	2324	161	53	14	168	16	4	216	113	447	413	1	3
3	15	535	170	134	0	10	252	251	89	551	255	6	7	17	6	41	75	511	3	126	142	266	148	223	3019	35	91	1137	62	587	10	10	32	36	669	1411	2260	155	46	10	151	11	3	219	131	437	434	0	3
4	7	489	174	126	3	10	245	262	91	560	277	6	6	12	15	51	59	483	0	133	139	285	130	210	2929	49	96	1181	63	579	10	9	35	48	771	1400	2302	163	52	19	142	17	7	212	95	459	398	3	1
9	6	507	173	106	4	3	201	281	76	564	254	6	7	6	12	49	77	541	4	130	121	298	138	227	2886	41	101	1202	74	592	8	12	41	44	704	1417	2210	164	44	13	167	11	9	209	132	413	410	1	3
6	3	498	186	127	7	13	225	308	104	560	278	2	8	12	7	38	61	511	4	140	161	284	152	197	2927	35	105	1183	71	616	14	8	44	49	726	1481	2368	195	41	20	162	21	9	197	131	427	422	2	2
7	10	497	154	122	7	6	247	314	94	500	223	1	9	13	9	39	67	514	6	111	150	256	137	216	2953	37	100	1155	57	570	11	7	44	35	689	1356	2341	152	43	17	168	15	3	205	128	417	471	2	4
2	9	488	179	103	2	7	229	295	80	519	227	2	12	14	5	48	59	463	0	132	122	255	170	226	2592	32	93	1162	65	591	16	8	39	40	646	1352	2332	183	45	11	148	21	11	201	108	438	448	1	2
1	14	527	166	137	0	9	271	289	65	549	262	8	6	18	9	41	70	467	7	136	151	262	143	210	2652	42	99	1247	57	589	14	9	29	27	727	1419	2401	183	47	15	151	19	6	210	125	460	449	5	1
5	14	455	164	129	3	7	223	280	62	502	234	2	9	7	9	48	57	403	0	134	166	259	157	190	2445	40	94	1239	73	609	19	5	36	22	684	1487	2434	180	55	15	129	7	7	214	106	413	444	1	4
6	7	486	140	140	2	13	219	286	70	553	272	9	13	13	10	46	73	423	5	149	138	264	131	174	2474	36	102	1242	49	601	11	11	37	40	653	1433	2330	174	45	29	139	14	6	205	117	448	431	1	3
5	12	487	162	124	3	15	226	278	50	553	241	6	12	16	8	44	72	429	7	149	135	261	136	191	2392	23	91	1274	53	591	7	10	45	22	657	1479	2512	171	47	16	149	15	4	193	116	457	444	5	5
10	8	491	171	154	4	14	215	300	72	601	298	5	7	19	12	49	60	427	3	135	141	252	139	178	2579	25	103	1199	64	621	9	6	40	39	653	1569	2419	167	46	12	142	8	6	214	98	426	447	1	2
2	14	478	147	132	3	9	244	270	61	512	241	5	10	17	11	40	44	425	2	138	137	239	140	229	2546	33	83	1187	57	630	18	9	27	40	584	1482	2381	154	49	20	153	16	4	215	83	421	469	3	4
4	8	516	182	125	6	8	249	281	70	569	263	4	7	14	10	42	65	534	2	128	141	219	129	225	2736	41	94	1284	56	639	20	11	49	37	625	1541	2449	197	48	17	162	13	7	210	89	443	430	1	2
3	7	508	186	116	0	10	254	271	78	555	264	2	13	12	9	43	71	512	1	140	141	262	124	206	2684	38	95	1269	58	588	11	7	35	35	675	1531	2357	173	63	18	150	14	8	207	108	441	453	1	2
2	12	499	146	127	4	11	230	269	96	506	233	6	4	15	8	38	70	531	5	136	134	245	133	218	2778	35	99	1198	63	594	9	10	43	44	661	1536	2409	126	55	13	189	11	3	206	110	406	500	2	3
2	7	474	166	143	4	7	239	255	84	572	273	7	6	17	10	43	64	510	3	153	117	256	138	207	2675	44	102	1258	61	619	4	9	50	39	755	1536	2350	179	57	11	155	11	5	207	118	453	466	2	3
5	8	515	165	128	2	6	245	277	111	538	230	3	3	13	12	30	62	493	5	156	139	261	129	209	2831	42	92	1260	64	592	12	11	39	41	706	1474	2387	152	52	18	168	20	5	216	109	421	471	0	5
2	7	515	181	135	2	11	267	289	81	545	256	8	7	13	16	39	55	501	3	143	146	245	165	215	2752	39	98	1268	66	578	12	5	38	43	690	1588	2422	160	49	21	158	10	7	208	110	427	466	1	4
6	11	510	165	127	2	10	231	257	79	494	260	5	9	9	16	24	78	537	5	137	139	285	138	214	2991	35	94	1218	68	592	14	13	49	39	704	1476	2363	153	47	16	155	15	8	198	131	413	458	2	3
2	8	505	166	129	4	9	234	288	94	640	245	11	9	16	13	40	71	573	5	128	119	234	142	195	3007	41	95	1205	81	603	11	7	47	41	691	1419	2246	169	49	13	175	16	13	190	116	425	445	0	3
4	9	495	164	121	6	8	220	310	87	554	233	2	4	17	8	34	74	544	1	136	143	245	141	209	2870	30	102	1292	50	593	15	7	51	45	648	1521	2505	153	42	16	171	16	7	205	104	399	455	3	1
4	5	526	158	123	6	4	263	316	96	518	249	10	9	15	6	30	60	522	2	125	138	247	134	193	2848	45	93	1241	63	621	11	14	45	50	669	1572	2321	145	46	19	181	13	3	197	96	451	470	3	2
4	10	503	138	153	4	4	274	278	90	510	234	6	8	14	8	37	81	549	2	140	138	244	135	207	2815	41	87	1325	47	581	12	5	35	33	711	1523	2351	153	60	15	191	15	4	197	121	422	432	3	1
1	14	517	173	119	5	11	266	291	72	700	239	4	9	11	14	39	68	573	0	144	134	257	132	223	2923	41	93	1301	57	620	9	13	51	50	725	1552	2383	145	54	18	195	20	7	203	98	418	447	2	0
2	10	483	150	143	5	10	252	299	92	569	252	4	9	14	8	51	65	576	6	147	138	231	127	191	2921	41	109	1293	63	610	10	10	46	48	692	1571	2352	165	60	17	174	17	5	204	137	426	415	0	1
2	11	524	176	129	6	10	254	324	103	609	247	4	5	11	7	35	81	550	4	138	142	230	139	230	2833	38	106	1324	75	595	13	9	45	38	754	1479	2343	135	51	18	184	8	1	200	131	440	464	6	3
4	8	461	146	130	1	7	282	301	95	558	248	5	10	15	11	36	73	529	6	150	145	258	118	203	2756	43	97	1236	66	557	7	10	57	33	743	1403	2436	136	55	11	186	15	4	195	123	447	421	3	3
7	7	476	151	136	4	17	260	275	111	539	250	4	8	12	12	34	66	580	4	144	141	249	126	202	2885	28	93	1286	74	635	13	6	46	45	705	1528	2305	152	49	11	187	12	9	200	98	438	458	1	2
7	6	516	180	119	3	7	236	277	92	549	225	4	11	15	7	39	82	576	3	168	132	275	121	196	2926	38	96	1291	51	590	4	10	49	61	691	1420	2456	138	61	16	199	13	7	193	121	441	410	4	6
4	13	491	180	129	5	7	244	273	95	561	220	5	7	16	9	42	72	550	1	137	159	229	140	193	2832	42	103	1241	67	578	4	7	54	44	723	1457	2445	152	53	16	179	15	4	217	98	410	433	2	3
4	9	503	155	128	2	11	237	300	86	478	243	6	4	12	5	39	68	544	3	141	124	230	131	204	2949	38	99	1250	41	617	11	9	57	52	692	1372	2336	150	49	18	205	19	7	227	135	400	460	0	1
3	12	505	168	127	3	12	231	275	106	506	249	7	6	15	11	40	54	547	3	141	127	225	152	179	2989	34	104	1367	60	587	11	10	44	54	723	1363	2323	135	52	17	186	18	6	210	117	391	393	2	2
1	18	521	170	114	2	9	275	278	92	489	243	11	6	9	9	38	55	595	1	148	118	235	134	190	2913	28	100	1264	62	589	9	5	42	46	637	1356	2290	175	56	23	205	17	5	216	127	425	441	2	4
7	12	504	171	120	1	9	252	285	86	509	247	11	12	15	14	40	69	549	1	145	136	233	142	207	2839	29	98	1314	60	604	9	15	45	59	689	1412	2250	160	43	17	181	16	8	182	138	411	442	1	2
4	19	508	145	124	5	11	272	270	87	488	221	2	8	9	4	35	74	575	1	146	146	224	136	184	2926	34	90	1248	74	570	6	7	55	45	693	1395	2270	176	53	20	187	13	13	195	145	416	415	2	4
8	10	528	185	127	4	5	271	303	88	520	226	8	6	14	11	32	78	555	1	130	138	233	147	197	2707	37	101	1312	70	595	12	10	48	44	711	1418	2255	150	60	15	208	13	3	222	125	450	434	4	2
8	18	484	138	128	1	8	242	286	95	477	206	5	12	17	11	32	74	608	3	138	144	237	153	166	2875	34	83	1215	54	608	12	11	54	55	640	1405	2341	156	43	10	191	18	7	207	130	401	442	2	3
6	21	498	151	112	2	10	245	294	104	502	192	10	5	9	10	42	74	602	7	129	123	230	139	180	2831	28	94	1190	47	608	6	5	45	56	717	1441	2183	152	55	16	198	16	4	199	136	428	436	5	0
6	9	532	166	123	3	9	246	296	93	507	254	8	5	11	8	49	57	577	0	131	131	252	160	207	2899	43	97	1306	56	633	10	6	49	60	717	1571	2177	139	55	17	179	15	3	222	120	418	448	2	5
3	21	495	158	126	2	5	269	297	101	546	202	5	10	12	9	41	81	608	1	127	132	244	149	177	3157	48	91	1208	83	594	6	3	48	53	737	1535	2139	139	53	11	234	14	6	192	138	464	432	0	2
6	24	526	166	123	11	15	243	276	105	498	238	3	6	9	15	45	61	553	3	130	129	227	154	195	3041	38	93	1326	69	584	5	6	51	68	682	1459	2195	159	60	7	211	15	5	202	146	436	394	1	4
3	15	520	168	116	1	9	245	267	91	481	236	4	11	13	14	43	80	565	3	123	140	198	147	203	3022	36	98	1323	71	582	5	8	61	47	674	1411	2230	156	52	18	210	15	4	202	150	427	405	2	3
5	22	521	162	126	4	11	272	282	109	506	243	4	5	13	16	43	85	572	1	148	109	239	131	196	2969	30	101	1269	71	623	16	7	55	49	694	1533	2095	150	62	23	197	17	3	184	136	460	421	1	3
6	16	559	159	128	3	8	265	304	96	503	257	7	9	14	10	44	61	568	2	119	154	250	155	189	3158	42	111	1254	71	632	9	6	56	52	711	1489	2210	143	54	18	219	15	6	211	139	468	430	3	1
8	16	508	166	124	7	14	267	309	96	528	244	4	16	11	3	40	68	552	2	128	122	256	138	206	3272	39	92	1271	63	613	3	5	41	68	697	1530	2106	162	43	18	204	14	5	173	138	428	450	1	4
4	21	489	161	141	3	6	274	286	98	569	262	6	6	7	5	39	76	567	2	137	117	246	130	210	3047	41	97	1218	72	582	10	8	53	42	682	1648	2124	142	42	13	190	16	3	210	146	430	477	4	4
7	22	551	145	115	3	5	260	294	113	507	220	8	6	11	12	51	62	570	3	140	138	228	142	181	3201	42	95	1282	63	572	13	11	61	55	658	1446	2171	148	55	18	197	19	3	189	141	423	411	4	3
4	14	511	158	123	5	14	261	301	105	532	222	4	8	14	9	34	69	544	5	146	106	238	165	200	3035	35	98	1284	60	625	9	5	55	56	663	1458	2046	120	43	12	206	13	5	189	168	439	408	2	3
9	13	538	181	119	8	9	269	304	103	533	297	3	5	16	12	53	71	567	2	129	128	245	127	190	3084	37	93	1324	66	638	8	7	53	57	769	1511	2060	135	58	12	190	17	5	193	143	424	409	1	1
5	5	530	179	132	6	8	307	305	91	554	260	4	11	18	9	47	70	575	1	130	124	265	126	186	3043	45	92	1311	73	638	9	8	53	55	741	1578	2218	136	57	13	196	13	0	196	150	402	435	2	5
7	10	552	173	152	4	7	273	293	100	605	260	5	8	18	10	52	75	585	3	122	136	258	142	198	3066	58	102	1302	66	642	11	8	62	41	754	1656	2221	140	52	14	180	21	3	187	159	384	465	2	2
5	13	500	151	126	1	11	301	306	108	537	241	4	7	18	12	51	78	570	5	143	115	256	155	208	3098	36	88	1252	67	656	5	2	60	54	720	1573	2117	138	56	10	184	17	5	190	167	439	378	2	1
7	19	509	184	143	8	11	252	323	79	578	286	9	7	11	8	52	70	543	2	130	130	248	139	190	3132	41	99	1318	64	613	6	8	68	48	741	1681	2114	128	52	21	191	15	3	203	129	438	460	1	2
6	19	518	159	146	5	9	299	263	109	549	255	5	8	17	13	41	67	562	1	127	115	243	140	192	3112	36	95	1305	54	657	6	6	65	49	700	1575	2020	120	52	15	195	16	4	199	129	387	458	4	4
9	10	524	190	131	5	7	272	299	81	558	238	4	9	16	10	50	77	544	3	144	107	258	131	185	3023	38	84	1314	60	634	9	5	40	53	766	1610	2102	148	50	12	194	16	7	190	147	417	386	0	6
6	14	545	159	131	7	10	252	290	109	562	243	4	14	16	13	47	76	560	5	140	139	258	134	193	3063	30	94	1282	69	624	8	3	51	60	763	1655	2116	131	60	21	214	16	4	193	136	392	426	4	3
9	11	498	185	121	3	14	273	268	97	587	218	6	5	17	10	60	78	533	1	127	127	234	139	195	3043	53	100	1235	67	629	6	3	58	63	714	1672	2013	148	52	21	203	21	4	179	140	408	422	3	3
4	9	467	164	140	5	6	289	288	107	548	226	3	6	14	9	63	68	547	3	134	131	251	142	194	2995	41	91	1122	67	630	11	11	53	65	683	1565	2058	123	60	15	204	14	4	217	129	433	407	4	5
2	12	474	161	131	9	9	292	267	111	554	243	6	3	8	13	54	70	509	2	109	106	260	136	183	2783	40	110	1195	79	667	7	3	49	57	740	1646	2085	135	58	19	188	17	3	210	136	427	400	0	0
2	14	471	175	140	2	14	290	276	77	549	257	9	8	10	9	51	76	515	2	130	128	242	141	177	2713	40	91	1224	58	649	4	7	48	49	748	1621	2201	140	71	10	194	14	3	192	122	384	440	0	2
6	12	483	163	131	6	10	262	292	99	540	260	10	5	12	12	44	79	508	2	131	138	267	123	191	2643	56	83	1260	57	664	8	2	62	41	725	1637	2212	126	48	20	194	12	1	209	112	390	433	1	1
1	10	532	162	141	3	14	257	294	103	556	224	6	3	12	3	53	58	515	6	122	123	279	132	191	2806	38	88	1294	63	623	9	8	60	43	698	1708	2193	162	34	15	210	16	3	199	159	408	420	2	1
2	21	499	148	121	4	14	291	270	95	509	216	2	3	12	11	57	76	528	3	128	126	277	117	187	2814	52	91	1213	73	702	8	4	49	51	702	1646	2115	131	67	18	207	16	3	212	142	406	405	0	3
7	13	517	169	127	9	9	290	285	109	558	249	3	11	12	5	48	65	486	3	121	142	258	132	199	2831	38	94	1215	71	642	5	4	63	58	732	1746	2002	142	63	12	197	16	9	209	125	398	442	2	2
5	16	552	172	124	2	11	275	278	100	581	241	3	6	12	7	43	90	464	4	120	116	231	140	207	2733	52	92	1214	73	633	5	2	56	44	723	1727	2050	137	45	15	192	9	4	182	139	425	397	0	3
5	16	528	169	139	4	10	283	290	89	604	259	4	5	10	10	45	71	469	4	130	124	269	130	189	2800	55	88	1279	65	670	9	8	54	55	750	1663	2133	129	60	16	195	11	1	185	124	405	410	1	1
4	18	532	148	139	8	10	283	330	122	581	251	10	10	11	12	54	67	487	3	120	137	243	139	188	2940	53	81	1204	59	682	10	7	52	44	782	1590	2174	160	53	16	181	15	2	179	139	421	451	1	1
6	15	489	177	132	7	16	266	307	102	595	250	5	6	16	5	43	78	498	1	114	116	271	141	190	2940	53	88	1277	58	648	9	7	56	57	760	1677	2128	141	54	12	181	15	1	185	118	434	382	0	1
7	14	536	166	125	12	11	273	291	102	536	236	5	10	12	9	47	74	508	4	123	126	266	130	182	2917	51	83	1222	62	644	5	7	56	37	739	1610	2202	143	52	18	182	13	4	182	155	414	423	1	3
3	10	516	152	127	4	10	263	295	97	522	216	9	12	13	7	49	76	478	4	112	125	260	148	191	2766	46	104	1269	71	637	11	6	54	55	727	1613	2151	151	69	20	171	15	5	194	135	412	395	4	2
5	10	500	149	130	9	6	262	316	90	619	257	9	8	15	5	36	87	467	1	123	131	266	157	194	2775	45	100	1257	67	631	5	6	42	38	749	1665	2122	140	49	18	176	14	4	186	146	430	407	1	3
4	12	530	159	127	8	14	312	296	110	556	262	6	6	15	11	55	75	480	2	122	120	283	133	178	2909	38	86	1291	65	658	4	6	50	36	761	1723	2179	142	54	19	190	19	6	186	127	430	416	2	3
5	16	520	152	126	4	5	288	274	88	540	250	7	8	15	8	44	72	504	4	137	129	271	155	178	2997	42	92	1251	54	626	13	7	51	48	699	1684	2151	150	55	8	180	10	3	194	135	424	403	4	3
7	13	518	158	125	8	7	291	279	110	546	195	4	10	11	15	43	82	451	4	128	120	285	132	177	2913	44	90	1239	55	682	9	7	54	47	714	1616	2249	125	60	10	178	15	8	183	143	455	357	2	4
7	19	554	148	130	6	14	278	303	101	621	280	6	5	17	7	39	81	494	0	142	132	266	136	187	2932	41	91	1236	57	617	13	2	53	54	798	1695	2194	174	57	14	163	9	2	180	146	412	405	0	3
4	10	516	140	146	1	19	266	332	103	588	252	13	5	8	9	49	88	495	3	108	139	304	130	175	3045	46	73	1191	71	629	10	7	50	56	732	1657	2160	153	56	19	173	13	5	170	149	368	419	2	3
6	11	497	125	123	3	14	299	277	107	599	221	2	8	14	9	51	71	450	2	124	141	257	145	172	2886	46	83	1211	65	661	6	7	45	53	764	1705	2224	148	50	12	177	16	8	181	150	376	403	3	3
8	21	519	126	127	7	14	283	316	108	613	248	7	5	10	6	47	79	497	5	117	132	263	136	159	2921	42	89	1171	73	650	5	10	53	51	716	1704	2164	141	50	19	203	15	6	189	137	394	430	1	3
5	14	512	167	98	4	13	278	294	83	619	234	5	7	16	8	39	86	478	0	135	143	255	158	133	2888	45	108	1082	71	632	4	6	37	49	746	1788	2248	161	54	20	168	25	6	184	138	379	429	1	4
12	10	487	148	122	6	15	263	282	89	582	249	10	13	16	9	43	79	494	2	114	143	261	145	163	2902	36	77	1096	55	643	10	3	57	54	756	1683	2177	171	49	14	190	18	3	190	104	420	406	3	2
8	12	500	133	115	6	12	270	308	100	664	263	12	4	9	6	46	83	497	0	114	145	293	153	179	2977	30	84	1143	75	637	3	5	40	50	773	1792	2261	157	43	18	171	19	6	196	111	377	391	1	2
7	15	519	146	128	7	12	257	268	96	659	271	8	5	12	6	48	67	479	2	125	150	272	146	157	2880	34	105	1149	95	655	12	4	58	40	728	1800	2262	177	54	14	165	22	8	198	107	386	411	3	2
7	18	440	162	119	6	12	232	288	103	615	230	8	5	12	10	40	79	505	4	142	142	271	151	130	2931	40	106	1179	85	652	7	3	52	35	729	1798	2339	162	50	14	158	21	3	184	114	333	407	1	4
5	8	428	145	115	8	11	301	268	105	630	253	6	9	16	7	42	63	478	3	121	159	288	130	143	2779	25	112	1188	91	639	16	7	55	30	727	1812	2446	178	39	22	159	15	6	204	97	346	373	0	1
3	5	416	134	134	9	16	291	292	103	654	255	3	10	19	12	35	70	500	0	143	150	252	163	154	2840	30	109	1169	110	609	7	6	52	42	763	1859	2314	210	33	22	152	24	4	180	110	337	384	5	2
1	15	401	149	127	6	10	284	338	95	676	255	4	8	10	14	34	71	560	1	135	131	288	124	121	2955	48	95	1164	86	662	7	5	63	37	703	1914	2526	169	38	14	181	19	7	180	114	348	372	1	4
4	7	406	135	123	10	8	290	287	100	655	251	5	8	11	10	28	63	538	6	128	144	250	143	121	3115	38	91	1295	87	669	10	7	58	39	721	1735	2580	169	50	16	179	16	8	180	109	333	408	1	3
5	12	409	130	123	5	18	284	304	102	658	289	3	6	13	13	32	59	522	6	114	141	285	136	132	2984	38	97	1213	96	636	4	5	56	52	680	1756	2667	169	43	17	170	23	8	177	98	296	383	1	2
3	12	379	166	103	7	10	269	286	91	670	285	5	10	18	6	31	73	474	2	123	131	244	140	123	2881	45	105	1286	94	648	9	4	48	44	682	1692	2801	176	51	18	165	14	7	193	99	319	384	0	1
8	8	322	156	106	7	6	255	296	93	650	272	8	9	14	13	48	54	459	3	133	124	265	142	101	2833	24	121	1274	104	638	8	7	41	28	700	1786	2825	187	55	17	145	22	2	184	98	323	405	2	3
5	11	274	132	117	11	6	260	302	88	640	252	5	3	16	6	30	70	470	3	139	119	275	162	100	3010	40	96	1181	87	632	9	6	43	57	745	1741	2823	137	48	13	185	14	3	178	126	329	372	6	4
3	18	280	148	110	5	17	269	286	96	671	277	6	11	31	12	19	52	504	5	117	122	287	134	111	2940	39	116	1099	104	676	7	4	58	37	753	1692	2952	153	49	18	168	16	3	180	130	330	366	3	2
3	11	247	145	123	5	11	267	307	96	663	249	2	8	10	8	31	61	491	3	102	128	273	144	108	2927	39	106	995	101	683	9	2	55	32	746	1750	3012	144	54	8	162	19	2	180	113	353	334	1	1
3	8	223	138	132	11	12	265	300	110	636	272	7	4	19	10	43	73	496	4	89	118	254	165	114	2996	26	112	958	86	623	11	4	53	30	788	1811	2809	135	46	12	156	23	4	178	109	328	369	1	3
5	17	199	161	114	11	18	253	316	104	687	285	3	4	12	11	27	54	536	6	109	117	265	159	119	3102	44	109	975	73	643	6	3	57	44	718	1900	2795	152	44	13	173	12	2	184	104	372	328	3	3
5	6	225	151	104	11	14	254	316	97	645	264	6	7	18	14	23	60	523	4	97	126	264	167	128	3046	43	116	908	94	610	5	7	43	46	716	1775	2693	171	49	14	155	14	4	166	132	340	379	0	4
3	7	226	133	130	5	26	268	303	106	716	265	9	7	11	7	29	55	509	2	112	115	269	153	115	3155	41	116	935	92	706	9	5	56	51	734	1810	2767	159	59	16	175	8	8	205	125	355	366	0	8
3	10	191	150	127	10	14	251	330	106	607	284	1	9	15	13	24	64	544	3	109	136	275	134	109	3261	31	110	925	94	664	13	5	53	46	734	1763	2833	154	49	21	160	24	1	186	127	288	393	1	2
3	10	192	150	127	11	12	285	302	127	755	277	6	10	11	12	23	68	572	7	116	142	281	133	99	3251	33	122	895	69	682	7	6	69	49	736	1770	2881	169	51	16	192	14	2	163	117	335	372	2	1
4	6	188	172	124	10	18	262	318	126	749	292	3	6	14	17	32	53	571	1	131	131	266	147	116	3093	43	134	887	81	666	15	8	51	48	691	1869	2880	192	52	9	203	22	1	200	136	354	348	1	5
2	8	183	165	124	12	17	267	334	111	691	289	3	7	12	6	21	52	545	3	120	137	253	141	89	3191	34	111	924	81	713	11	9	51	45	642	1793	2928	174	45	9	176	19	9	182	126	318	392	1	3
3	5	168	160	107	8	22	290	327	111	756	273	3	8	11	11	22	64	534	4	114	138	238	130	113	3070	32	112	929	91	648	11	4	47	34	667	1819	2891	151	47	17	162	16	5	160	113	324	388	2	3
1	5	184	140	141	11	18	270	357	111	829	308	7	9	14	11	33	54	490	1	120	106	256	146	114	3162	46	127	868	92	649	12	4	54	45	692	1858	2854	166	48	15	160	9	6	173	118	313	410	4	3
4	3	193	139	126	4	19	295	315	116	791	320	5	5	15	16	22	75	514	3	142	112	228	150	90	3104	41	109	895	97	633	8	6	39	38	632	1837	2847	177	43	11	179	15	3	174	129	321	386	5	1
2	9	184	172	134	8	20	257	359	112	916	340	7	9	19	15	33	71	560	6	119	130	264	146	101	3149	39	120	929	81	663	12	5	50	46	584	1859	2940	160	54	14	184	14	8	189	128	320	427	1	1
5	10	175	158	126	11	24	268	340	84	847	319	6	12	16	11	22	62	512	2	141	120	236	158	97	3007	38	118	843	77	615	8	3	52	36	481	1738	2881	165	33	12	156	17	2	179	129	294	412	5	1
4	5	171	154	120	8	24	268	347	107	843	349	9	15	9	14	30	67	483	3	130	119	262	158	97	3188	42	110	927	87	657	8	7	41	46	434	1584	2950	206	40	16	164	15	4	181	145	319	392	4	5
2	9	174	167	151	6	17	300	337	98	939	351	4	8	12	10	27	57	498	1	129	105	260	165	93	3026	37	129	939	75	630	11	4	50	34	428	1529	2870	182	34	14	175	21	2	221	116	339	384	1	2
2	9	174	183	148	7	14	275	331	85	919	324	3	10	11	15	25	70	511	2	118	119	246	162	100	3096	41	118	924	94	648	12	7	55	31	347	1373	2820	194	47	14	185	12	7	195	111	355	368	1	1
5	9	185	145	137	6	24	295	351	102	909	333	4	11	12	11	28	61	488	2	110	113	250	143	115	3103	42	119	937	89	635	10	5	45	25	294	1237	2929	158	45	8	184	12	2	191	114	346	370	0	3
5	12	181	167	108	3	20	289	320	91	926	312	7	8	14	8	35	57	531	2	124	121	255	176	112	3074	48	119	926	104	621	16	3	61	34	273	1248	2923	179	45	9	187	12	5	201	137	358	380	0	4
3	5	150	178	105	8	16	262	326	107	904	338	6	1	15	11	31	53	490	1	139	120	238	156	86	3035	34	105	951	105	633	17	3	48	32	265	1070	2935	188	56	13	153	17	4	192	109	333	384	5	3
6	5	178	187	101	8	25	286	324	101	947	351	6	9	15	17	29	63	483	2	136	117	260	146	100	3145	32	142	867	101	636	15	4	45	37	270	1100	2858	175	42	12	197	10	3	203	108	340	387	3	2
5	14	181	196	150	11	30	289	336	88	935	303	7	10	14	18	28	64	474	5	124	138	263	155	113	2873	38	125	968	111	557	11	6	43	44	264	944	2995	168	44	10	168	15	3	193	113	317	369	4	1
3	8	181	235	139	7	27	259	326	94	865	323	6	11	15	12	23	53	460	1	136	112	271	139	99	2973	47	138	948	94	609	13	6	41	34	271	1015	2967	163	43	12	170	14	2	180	119	311	387	1	2
4	11	179	231	125	7	22	299	301	83	836	320	6	6	11	18	25	65	461	1	135	135	244	139	99	2992	44	137	924	116	564	17	10	52	41	263	962	3050	194	68	4	201	15	4	206	121	317	344	3	1
3	9	158	243	159	7	24	314	306	90	833	329	3	6	12	9	36	46	465	1	152	112	245	137	79	2983	61	130	926	95	587	19	1	53	35	266	860	2993	190	54	14	182	9	4	189	106	329	361	1	3
3	7	139	246	145	10	29	293	292	87	798	347	6	6	15	12	31	47	495	2	135	123	266	137	84	3054	40	139	969	80	562	16	6	48	35	312	944	2988	212	32	9	184	13	1	205	94	309	373	2	2
3	6	174	251	168	8	24	301	298	89	850	332	5	5	20	10	31	41	423	2	138	117	265	148	94	2876	52	136	1018	83	530	17	1	54	37	287	841	3117	171	53	9	173	12	4	208	115	321	356	0	2
3	6	143	213	162	5	27	268	289	89	822	320	8	5	24	15	37	47	409	4	150	109	266	152	87	2938	37	133	933	101	549	18	11	51	33	284	902	3113	192	47	12	160	12	4	210	107	317	348	0	1
2	13	159	242	147	9	20	278	286	93	806	307	4	11	10	16	32	48	469	2	122	111	261	151	84	3182	42	136	988	94	613	17	3	56	37	289	733	3047	187	44	4	175	17	7	219	117	318	341	1	2
7	9	175	269	154	11	24	296	326	92	801	295	6	12	11	11	27	41	463	2	131	117	258	152	85	3268	54	125	955	93	573	7	5	46	43	301	806	2978	187	49	8	196	15	5	215	127	297	333	4	1
2	10	175	277	161	6	35	291	273	88	859	339	2	10	25	9	29	45	450	2	135	132	285	138	87	3116	42	145	980	96	587	15	3	47	32	284	713	3005	196	54	7	160	12	3	232	128	312	306	2	1
4	13	179	262	163	5	32	270	273	102	848	294	7	10	17	19	31	50	491	2	114	116	281	168	86	3246	40	141	1004	76	579	8	6	46	40	326	741	3149	171	48	4	161	17	1	225	110	304	349	2	0
5	8	171	255	149	4	30	281	313	105	832	290	8	14	13	7	27	47	459	1	145	101	294	144	76	3149	55	133	993	71	520	10	6	59	32	379	1129	3060	211	38	12	158	20	7	193	99	313	322	1	1
3	14	177	247	174	14	29	287	303	97	803	278	5	10	10	12	26	55	458	1	138	117	291	144	80	3214	39	151	1017	93	618	11	3	47	35	373	1520	3028	195	44	17	182	16	1	214	115	353	309	3	3
5	11	174	227	168	8	40	288	284	87	798	313	6	9	23	13	23	48	446	0	137	121	282	139	84	3190	44	123	1023	90	538	5	6	50	32	384	1932	2954	177	32	8	169	14	4	215	101	326	338	3	2
3	7	172	221	142	9	28	317	286	82	814	313	9	9	22	8	19	43	461	1	139	126	290	140	81	3226	47	147	1020	76	584	14	5	52	30	407	1948	2949	200	47	10	170	14	3	217	100	320	313	2	1
1	3	199	247	162	4	33	313	267	89	807	291	10	10	17	17	23	47	499	4	133	130	297	146	64	3271	43	144	987	94	588	9	9	70	32	455	2142	2989	216	28	13	169	18	3	223	104	297	341	1	1
4	11	192	243	149	12	36	282	302	111	780	287	8	8	15	15	24	56	487	0	137	118	262	150	73	3179	36	133	1039	91	592	4	5	44	36	440	2184	2950	220	45	10	151	18	4	204	109	308	317	3	3
3	3	177	237	177	6	23	299	299	99	812	277	1	9	16	13	30	52	470	2	101	132	309	135	92	3245	48	137	1006	89	581	13	3	55	39	457	2174	2938	207	31	16	157	7	7	224	104	290	307	0	1
1	3	201	225	135	8	38	311	267	94	804	275	5	13	14	10	23	50	473	4	146	112	255	143	65	3339	33	142	1019	104	530	10	4	63	30	393	2042	2963	223	35	12	171	18	2	219	93	297	337	2	2
4	6	183	242	165	9	30	307	278	95	752	257	5	9	15	7	27	48	485	2	134	112	265	158	76	3306	33	143	942	91	555	12	5	53	28	411	1993	2970	185	37	8	163	17	7	202	93	297	307	0	1
4	6	187	283	194	7	30	296	294	80	832	308	9	10	7	3	27	43	418	1	129	115	278	138	70	3278	48	157	922	91	566	6	8	54	42	385	1633	3062	190	42	14	147	19	6	228	81	284	320	3	1
3	13	177	298	190	11	25	273	314	111	710	306	4	15	17	9	30	40	408	2	152	134	280	117	89	3282	54	161	965	89	534	9	5	44	31	349	1156	3053	221	40	12	145	10	4	224	99	279	310	1	2
4	8	163	271	194	14	24	273	308	106	775	279	5	4	14	7	28	51	412	1	134	130	255	128	73	3301	41	173	1004	75	531	13	2	47	30	338	1082	3037	190	31	7	129	9	3	224	80	274	312	2	0
0	9	197	288	228	8	42	298	318	102	889	322	7	7	23	8	31	47	461	0	129	123	280	119	79	3279	59	191	957	83	543	16	6	65	45	348	791	3057	224	41	6	145	15	3	218	92	275	346	1	3
1	6	185	278	210	4	25	275	306	107	837	280	7	11	15	11	27	46	433	1	129	139	271	129	81	3207	40	172	967	82	556	15	10	47	48	321	765	2965	229	43	11	148	23	2	226	85	272	312	1	2
3	5	188	311	165	6	36	271	316	90	862	289	4	11	10	12	31	35	436	2	142	119	273	132	61	3238	54	174	1017	78	534	13	7	54	36	323	796	3043	195	27	11	144	9	1	214	107	261	316	4	0
1	11	193	302	174	12	30	284	309	74	783	301	5	10	11	13	32	35	393	2	138	130	275	144	72	3142	54	173	1038	71	570	8	4	45	33	295	706	3108	244	42	11	146	18	4	210	127	282	345	0	4
3	7	159	297	169	8	37	285	298	91	787	283	4	2	9	15	39	36	423	1	126	131	319	134	64	3040	55	151	1023	71	573	12	11	42	32	354	706	3078	226	34	8	126	9	4	234	95	252	334	1	4
4	11	178	304	166	12	33	255	294	64	804	293	4	8	18	16	27	41	393	4	123	134	273	131	66	3064	44	173	1032	79	595	7	8	42	41	326	694	2969	246	39	9	122	14	7	229	79	280	337	0	2
4	6	156	277	192	3	34	256	273	76	827	317	5	3	22	23	23	55	387	5	137	128	291	139	72	2959	53	170	994	71	552	9	5	44	28	322	669	2995	241	25	10	122	18	0	221	123	262	335	3	3
3	11	167	329	188	2	35	241	295	79	875	283	5	7	11	4	30	48	372	3	126	122	295	124	77	2898	61	185	983	69	639	6	3	47	22	318	533	3071	241	39	5	135	13	6	222	120	279	308	0	0
3	7	171	312	190	11	38	224	305	63	802	292	6	6	15	10	23	45	365	0	113	79	301	145	85	2739	52	174	882	68	578	4	5	50	19	293	522	2884	249	29	5	109	17	2	234	111	234	328	3	1
0	9	164	301	187	3	39	260	276	64	817	297	2	4	11	14	27	40	401	1	106	75	300	154	67	2739	57	168	992	72	606	6	5	39	23	306	639	2960	248	35	8	123	16	6	226	118	267	334	2	0
3	7	171	301	185	5	49	256	273	59	785	313	8	8	11	9	29	44	344	1	85	75	348	170	54	2718	53	172	927	61	624	7	3	33	28	335	814	2900	270	31	6	107	21	3	219	120	250	353	3	0
[truncated: 61 more columns]

## Sheet: cont PTX rep 2
C8112	F8212	F8311	C8122	B8322	B8421	C8421	C8131	C8132	C8231	C8232	B8331	B8332	C8331	C8332	C8333	B8431	B8432	B8142	B8143	C8141	F8141	B8241	B8242	C8241	C8242	B8341	B8342	C8342	B8441	B8442	F8441
139	0	5	204	4	75	69	71	88	28	115	159	242	103	22	149	120	68	102	109	52	195	207	79	87	108	457	129	19	259	128	2
110	1	0	172	2	72	61	38	50	19	63	169	230	83	16	104	118	61	100	92	40	180	214	82	66	74	444	144	18	259	117	5
167	0	4	316	3	84	92	57	89	18	124	199	288	102	24	155	154	62	94	112	71	177	261	96	77	125	471	156	30	300	141	3
139	0	5	229	5	62	57	47	60	14	63	188	251	100	20	131	152	65	94	105	36	165	271	85	62	80	458	143	20	239	127	3
251	1	5	312	7	65	105	57	91	36	96	222	250	146	30	171	138	71	111	115	58	172	279	89	81	125	530	162	26	283	152	8
201	0	8	227	0	68	87	51	92	12	82	190	275	145	27	146	165	80	88	131	65	209	238	84	69	102	451	154	18	258	149	7
138	1	12	161	3	64	53	26	63	20	52	200	270	88	18	123	120	69	86	127	40	188	253	90	54	85	433	148	20	261	146	2
291	1	3	266	9	52	72	43	77	45	114	195	276	147	28	171	135	64	91	129	46	190	244	75	74	106	496	153	23	298	136	2
128	2	16	130	3	47	42	18	42	15	50	163	288	80	7	93	129	61	82	94	31	171	231	70	51	82	452	158	14	279	137	3
141	0	5	143	7	53	46	29	31	17	45	181	267	83	17	106	147	58	101	125	61	179	271	105	62	77	489	148	20	249	138	7
171	0	8	144	2	63	51	26	33	16	42	212	297	67	18	108	135	80	90	114	43	203	240	98	35	63	502	145	11	291	146	4
231	0	7	196	3	74	74	51	40	26	51	182	294	86	30	127	171	73	94	157	49	202	231	101	55	72	481	142	19	285	155	4
340	2	5	315	2	71	79	56	77	25	76	179	237	127	22	166	164	70	101	127	54	195	233	74	63	95	433	125	22	257	130	4
364	1	13	388	1	70	78	58	71	31	90	158	302	135	26	160	173	64	98	138	70	223	252	100	75	115	454	131	28	279	160	2
295	2	4	312	4	66	63	45	73	17	52	180	285	117	16	114	154	63	100	111	65	186	234	105	73	127	420	152	18	266	155	8
339	0	7	214	6	82	82	38	81	18	48	223	338	125	21	145	183	86	95	152	41	166	271	89	80	100	503	155	20	309	217	4
341	0	6	243	5	54	57	49	74	18	48	173	300	121	24	140	137	81	86	134	45	201	251	97	64	90	437	155	27	264	159	4
313	1	4	235	3	60	92	81	95	25	48	234	337	154	38	162	171	82	100	141	70	183	308	112	80	131	556	182	35	321	184	4
298	0	14	188	2	48	67	45	85	7	56	181	284	136	27	137	144	85	85	128	46	185	243	103	52	92	468	134	20	286	143	5
294	0	5	233	6	71	55	38	87	19	52	190	341	148	29	144	162	74	71	139	41	198	234	91	54	90	463	179	29	312	179	3
369	0	3	367	6	62	54	51	94	10	38	208	266	172	27	155	160	96	94	127	64	205	232	100	62	99	481	136	35	312	156	6
320	0	13	247	6	84	70	68	99	13	65	204	385	164	32	200	179	79	90	171	66	202	268	93	84	122	483	206	38	313	183	5
373	0	8	225	6	66	77	62	126	9	39	207	293	163	22	151	146	97	87	177	64	209	274	112	89	129	496	163	26	309	176	5
286	0	9	237	6	75	60	46	105	7	41	239	321	160	25	149	157	74	99	144	53	172	258	117	72	112	539	200	30	319	188	4
397	2	7	240	5	58	72	60	101	8	36	176	248	152	28	167	124	69	91	100	60	189	241	89	58	95	445	123	27	239	136	8
250	1	3	234	7	45	86	54	103	8	28	175	240	157	33	129	128	65	98	109	58	200	246	86	60	116	448	145	38	234	133	6
356	1	7	364	7	57	92	68	103	9	28	192	241	167	28	137	161	76	104	97	47	203	290	98	64	97	483	149	29	271	127	3
352	1	6	429	4	58	71	68	115	15	34	199	260	149	32	136	152	71	118	88	73	210	299	110	80	120	661	128	36	246	148	7
231	1	11	344	10	56	80	76	102	13	27	214	293	166	42	167	152	84	97	115	75	179	280	88	87	95	563	157	42	328	155	2
315	0	6	291	8	52	99	75	112	13	27	228	353	191	35	187	164	67	106	142	67	223	308	108	87	123	532	182	31	353	175	9
476	1	8	244	8	46	56	56	81	11	25	258	357	153	29	159	175	68	108	154	37	234	302	118	75	98	577	180	24	369	209	4
490	0	10	231	5	57	88	75	113	27	47	221	306	192	36	209	137	68	84	124	32	217	298	102	79	114	493	177	28	323	176	4
255	4	15	133	6	42	70	76	124	16	40	257	365	172	28	195	163	62	94	124	44	202	252	110	79	118	515	214	27	434	186	6
421	3	8	309	1	56	73	65	102	18	51	224	338	161	38	188	155	71	86	136	43	218	254	102	78	109	534	175	24	346	161	8
360	1	7	313	4	48	94	63	124	17	25	268	348	193	48	164	167	68	105	148	36	212	318	111	77	105	562	176	23	344	200	8
257	0	2	193	2	39	50	35	60	6	28	117	208	114	15	97	82	30	54	72	14	103	159	53	36	60	310	83	10	196	110	3
168	1	10	89	8	24	29	31	26	15	16	202	337	76	27	93	79	42	36	130	35	91	110	45	22	38	352	144	12	313	170	4
337	3	17	155	5	68	43	63	63	29	56	350	587	108	41	146	183	75	81	217	58	185	294	107	41	83	676	284	23	566	280	9
503	1	24	264	4	52	40	57	49	18	37	345	620	115	50	160	172	103	80	177	64	210	347	135	57	72	682	297	32	523	314	17
513	6	22	277	8	64	48	57	62	21	59	466	743	124	48	172	224	120	106	196	71	197	426	164	63	96	815	375	13	674	363	18
580	3	19	302	8	81	32	52	60	31	93	543	827	114	45	153	266	112	111	244	62	177	430	179	53	88	883	424	21	713	394	11
715	2	29	340	5	77	62	64	77	25	108	509	814	116	64	175	272	118	98	235	70	172	399	170	74	112	839	401	22	709	324	15
643	0	20	229	5	70	53	64	94	33	77	472	741	106	42	138	216	105	100	236	57	152	355	170	56	126	753	370	18	645	308	16
597	3	17	198	11	58	59	73	80	42	100	492	782	81	31	109	226	101	87	235	55	157	389	133	64	101	787	387	17	652	298	12
475	2	12	202	9	64	43	78	73	45	105	473	706	65	43	121	174	127	84	201	50	184	350	140	52	107	705	339	25	551	262	7
660	3	13	266	10	56	66	85	94	46	172	426	728	79	54	174	183	86	96	256	67	163	361	132	74	142	713	356	16	547	229	2
727	1	21	259	5	70	66	107	108	48	110	396	646	98	52	131	169	71	78	204	81	137	303	106	78	139	624	341	26	493	231	6
689	1	21	235	10	56	55	96	99	32	120	406	735	104	44	117	165	75	91	237	66	135	297	133	64	130	696	337	17	557	244	7
800	2	15	255	8	43	52	116	93	31	76	472	707	89	45	129	163	88	84	217	70	120	350	133	77	134	746	329	13	553	286	5
809	0	12	259	3	59	75	109	136	51	107	440	675	109	60	207	156	66	97	213	71	167	323	108	82	159	654	344	22	501	233	3
710	0	20	220	5	59	62	99	117	37	97	430	653	73	41	140	141	86	75	183	69	152	309	101	69	130	625	331	17	518	210	10
778	0	15	307	2	58	76	105	124	31	98	459	727	93	53	160	163	83	97	219	82	147	315	127	64	161	707	333	19	572	249	3
795	0	19	324	5	53	72	114	151	48	130	451	740	145	74	227	175	65	96	203	74	220	323	138	93	203	691	333	26	570	250	7
729	0	17	240	7	66	54	105	105	40	98	431	668	84	27	161	137	79	93	186	63	211	304	110	82	138	695	286	19	532	225	8
605	0	25	224	10	56	51	70	84	33	79	443	761	96	41	159	141	80	94	202	59	197	320	113	74	163	759	311	25	609	236	9
675	0	13	218	8	49	63	89	86	34	94	449	708	105	49	140	148	83	89	202	69	205	303	121	77	141	709	304	15	544	257	6
615	1	11	204	2	56	44	80	104	30	84	402	681	91	46	128	137	76	78	162	52	180	302	87	68	132	641	314	30	514	234	4
738	0	17	222	3	52	64	90	98	48	126	422	714	125	45	168	138	68	88	157	80	229	301	91	96	151	689	317	29	573	218	7
695	0	15	208	5	44	50	90	115	48	112	482	720	117	47	158	161	72	88	162	43	268	302	110	74	155	759	305	17	596	255	6
688	1	20	207	4	59	72	102	116	41	114	449	718	126	61	162	133	70	75	156	79	233	279	137	102	159	735	296	21	596	232	9
776	1	18	258	4	54	67	111	142	23	82	434	619	124	47	152	117	70	60	126	67	247	299	82	79	160	652	308	21	508	215	8
717	2	28	253	4	39	58	95	117	19	78	468	634	89	45	139	135	60	76	111	49	239	293	101	76	127	708	313	16	563	238	5
675	4	31	258	7	50	65	104	147	23	72	442	716	129	42	180	138	64	73	138	60	249	292	115	98	173	762	308	14	651	211	15
685	2	28	283	7	54	67	99	104	26	64	461	761	117	54	168	119	84	84	140	68	236	326	104	84	164	800	318	13	647	249	10
679	0	28	232	6	55	59	124	116	22	76	408	727	118	42	185	119	67	88	124	57	267	270	113	90	168	779	263	18	574	237	15
817	1	35	266	6	41	87	128	127	18	69	410	698	115	53	202	108	76	78	141	61	299	285	96	85	179	776	267	23	546	217	14
715	0	22	278	4	46	62	93	114	23	50	487	776	96	39	156	126	73	88	185	41	325	326	124	68	142	915	309	24	613	259	20
708	0	31	260	9	67	67	89	137	17	55	494	753	140	41	175	114	99	83	160	47	328	344	107	93	155	857	339	19	625	256	13
639	2	35	220	10	61	64	86	115	33	70	470	732	135	35	175	152	55	76	156	52	341	347	94	101	177	821	299	14	616	231	11
707	2	36	222	6	46	60	105	110	22	80	461	738	124	41	190	146	78	82	145	46	369	316	119	103	152	844	287	19	579	255	18
721	0	35	243	8	78	68	97	126	20	68	458	698	129	39	199	145	61	80	138	44	326	307	99	114	162	775	313	21	526	255	15
661	2	20	239	11	72	78	101	145	26	76	463	790	161	46	216	169	54	76	153	44	269	324	118	94	234	853	298	37	604	248	15
652	0	22	228	7	67	72	82	145	19	40	492	788	151	49	204	154	96	80	168	38	266	355	100	111	193	935	315	32	656	238	10
735	1	19	248	7	67	75	124	129	19	61	443	789	152	46	185	177	64	69	161	53	244	328	94	85	203	860	330	43	585	246	12
783	2	11	272	5	79	86	132	132	21	47	487	766	171	59	243	173	97	71	145	56	214	335	121	102	198	906	318	41	693	252	6
727	0	21	231	6	62	89	97	151	31	60	585	819	163	56	214	193	77	90	160	51	229	409	128	95	218	975	326	36	713	285	7
700	1	11	196	9	54	68	90	116	27	64	515	777	133	38	189	167	78	90	137	34	207	355	125	81	179	868	298	39	653	278	6
648	2	18	226	9	63	76	89	110	16	70	561	808	148	41	203	172	87	82	178	45	177	374	123	91	196	915	311	45	689	301	3
674	1	17	182	9	55	92	113	117	18	79	577	809	142	40	226	171	88	85	162	40	223	391	127	87	194	896	337	36	702	328	10
613	0	24	190	16	64	54	77	105	11	39	511	780	100	40	154	180	79	75	151	37	233	386	116	61	116	914	332	33	687	248	11
782	2	43	212	7	59	93	113	125	16	49	545	731	152	62	210	158	103	68	156	61	321	376	117	66	177	888	315	34	649	241	22
803	0	10	257	14	66	67	95	128	19	36	550	846	133	53	187	188	85	82	153	51	155	397	142	70	208	1027	292	39	733	261	6
832	1	10	297	11	66	91	121	139	21	62	553	757	187	46	265	180	91	74	146	53	227	380	119	102	217	876	331	34	679	253	5
796	0	22	273	10	65	85	100	122	15	38	569	858	145	63	213	179	104	82	167	40	188	380	112	83	185	986	344	41	758	244	7
752	1	15	278	15	62	76	98	118	18	79	498	682	183	51	208	162	94	70	136	49	130	375	88	75	201	819	321	31	600	222	4
761	2	13	292	8	67	87	115	124	13	44	532	731	182	48	239	158	104	90	147	44	181	370	129	80	209	906	302	34	667	228	8
747	1	12	264	12	70	71	115	106	12	42	521	756	173	46	224	185	107	75	138	24	208	382	121	68	189	903	311	29	667	271	3
674	5	16	239	15	66	56	78	84	11	39	582	769	131	34	175	193	91	90	152	44	223	392	110	71	161	937	348	27	748	260	6
606	0	25	229	10	64	74	91	122	13	36	538	754	203	62	238	174	97	77	133	33	206	416	134	86	225	852	327	33	713	246	4
577	0	14	216	13	72	90	101	126	9	24	538	806	202	53	257	177	108	94	162	35	176	401	125	89	263	948	331	21	732	261	1
453	0	24	200	14	77	66	94	110	16	36	576	793	150	46	187	199	109	99	146	21	240	441	136	65	198	945	379	13	671	287	4
681	2	15	216	16	70	67	92	106	11	40	550	745	136	49	215	199	100	81	188	25	167	395	127	64	185	916	310	13	664	255	8
703	2	22	245	14	74	90	109	145	9	26	562	717	215	53	244	194	90	88	175	29	165	386	122	98	230	888	321	22	700	214	6
647	2	5	175	12	68	79	94	139	18	48	546	781	183	34	233	184	100	87	168	29	133	421	107	64	199	935	310	17	697	256	6
636	2	20	175	14	64	84	81	112	21	46	566	757	153	58	196	177	129	70	178	17	262	354	130	66	160	929	312	24	740	260	11
553	2	20	164	9	48	55	87	105	10	40	637	860	133	40	169	222	108	96	197	19	219	393	146	60	158	1027	363	9	788	320	5
826	0	12	225	8	66	93	105	123	18	56	537	824	178	59	243	186	102	97	193	18	229	389	134	92	197	997	341	16	742	298	7
600	2	12	202	9	74	83	78	109	15	53	547	822	181	37	222	198	115	94	183	14	238	395	136	75	182	1078	333	21	718	327	7
584	0	16	206	14	66	80	95	140	18	47	582	795	163	38	193	201	113	104	171	14	169	405	164	61	193	1012	353	26	760	289	1
482	2	25	202	16	68	69	67	116	15	53	684	852	157	42	193	217	141	82	183	11	226	432	163	61	191	1139	345	18	840	335	4
458	4	17	200	18	63	90	74	125	21	41	600	820	184	45	212	193	139	107	176	22	234	414	156	85	200	994	373	23	774	284	9
393	1	34	162	32	71	69	61	114	13	55	592	773	156	32	182	198	129	94	206	17	229	403	133	53	155	1028	339	12	760	275	6
485	0	16	173	32	77	69	93	97	12	50	573	850	148	47	172	201	130	105	195	20	213	394	161	61	173	1017	358	16	736	276	8
364	3	34	157	28	65	71	64	78	10	37	528	783	127	35	159	192	117	79	167	24	259	367	127	38	162	903	333	10	726	266	6
468	1	23	169	29	46	82	75	93	9	19	583	775	153	43	221	190	104	83	138	21	239	365	110	63	175	931	314	13	731	268	8
451	3	23	177	28	52	80	82	76	4	30	596	779	135	38	211	224	108	82	173	24	285	390	146	59	165	981	307	16	781	256	9
530	0	22	210	27	63	69	61	74	5	18	624	876	142	31	187	209	147	118	210	26	257	433	136	50	155	1052	362	13	796	305	14
539	1	31	149	29	45	75	79	99	13	27	604	800	160	46	222	223	128	101	197	15	318	422	139	63	200	1003	326	22	785	283	12
589	1	28	168	32	49	73	77	85	9	28	618	783	146	33	222	218	121	100	182	18	234	380	128	65	173	1049	295	11	801	312	9
546	0	31	169	27	35	73	93	66	6	14	602	859	171	38	231	224	102	102	188	18	273	382	139	72	231	1044	285	17	770	304	10
502	0	35	175	36	52	69	78	61	7	32	648	846	151	30	231	220	109	105	193	13	290	411	129	70	193	1077	340	17	872	303	7
486	1	52	182	41	40	94	73	44	11	15	628	860	177	39	240	210	108	98	179	27	315	413	155	77	222	1178	314	20	873	298	8
464	2	43	158	40	46	84	62	51	1	20	567	786	150	32	202	197	97	107	195	21	232	408	129	56	216	971	323	17	769	278	7
496	2	43	134	27	58	71	57	54	1	10	632	781	115	33	209	220	106	92	209	19	280	405	146	53	184	1053	325	16	834	322	8
375	1	55	126	30	59	52	38	32	3	10	621	759	114	39	132	211	101	96	192	10	254	392	155	44	127	1033	307	14	821	286	7
413	1	42	128	35	57	63	50	44	1	14	668	825	150	29	209	235	96	101	176	13	257	411	125	74	180	1074	325	17	859	294	9
422	1	64	122	30	55	76	52	53	0	9	637	918	142	36	173	239	119	116	188	16	269	467	125	58	195	1122	333	15	845	306	8
424	3	44	117	36	66	64	50	53	0	10	644	855	135	33	190	237	108	104	186	10	280	404	130	58	187	1119	306	15	861	308	7
363	0	44	114	18	50	58	42	46	2	8	650	885	111	28	173	224	124	77	167	6	285	377	134	54	160	1123	306	10	862	277	14
503	1	61	129	21	54	82	56	53	1	15	661	911	145	34	205	217	104	92	172	15	281	418	143	68	209	1171	313	16	872	290	8
542	0	53	186	27	55	79	56	55	3	6	638	776	174	33	236	220	117	88	160	10	256	397	139	76	220	1043	321	20	808	299	12
510	0	43	164	22	46	62	53	49	3	15	635	868	168	43	210	238	109	88	168	18	235	383	108	87	237	1120	366	21	892	259	2
570	1	62	172	31	40	81	83	80	4	16	649	919	170	44	222	238	115	98	205	18	351	385	132	89	266	1147	296	18	921	272	10
389	0	41	134	18	37	55	60	42	3	9	624	858	113	32	166	223	120	91	190	5	255	379	145	65	184	1101	318	12	845	304	9
410	3	42	144	18	40	60	44	60	3	9	604	835	140	38	202	219	109	96	180	8	273	358	151	59	191	1062	316	9	831	316	13
289	0	56	177	38	53	73	62	57	0	8	610	926	182	34	217	232	126	121	191	10	297	422	139	76	217	1135	301	19	881	289	12
307	0	40	150	23	56	68	64	47	3	20	588	895	150	38	177	242	105	118	174	9	283	435	159	45	151	1075	325	11	845	279	12
381	0	46	152	15	56	78	53	46	6	15	588	884	165	34	200	208	124	119	157	11	301	385	132	51	167	1132	273	18	851	290	18
348	0	51	133	15	47	61	53	51	0	9	552	816	147	37	172	220	90	108	151	9	330	368	128	46	160	1028	285	19	749	259	3
380	0	50	116	11	58	61	42	25	2	13	579	834	131	30	155	207	106	97	177	9	303	395	114	56	121	1060	302	18	842	251	8
411	4	46	124	18	58	69	57	35	1	16	631	897	179	42	214	216	113	101	163	16	307	369	114	47	195	1130	305	19	833	292	16
448	1	39	135	20	41	78	47	46	4	42	663	898	159	49	206	207	118	116	187	9	290	407	131	49	174	1187	273	19	840	307	17
354	0	32	107	15	44	48	53	36	4	12	610	908	134	44	180	220	103	99	185	13	271	370	129	75	170	1124	270	22	864	287	19
389	2	39	123	8	48	58	56	51	4	17	637	912	154	41	190	225	93	116	157	16	293	408	120	55	178	1209	300	14	831	310	19
213	2	38	74	20	58	38	43	22	5	24	657	953	74	15	105	243	122	103	177	8	307	406	122	21	101	1220	298	8	827	315	15
233	0	48	87	19	57	52	52	30	5	13	633	927	113	26	170	247	114	115	184	5	285	384	134	50	130	1137	292	12	855	265	15
244	1	55	118	12	62	63	68	47	4	19	601	950	170	36	195	218	121	112	184	9	304	376	146	73	161	1158	289	20	825	287	22
125	2	52	40	17	60	20	15	23	1	4	601	865	59	18	90	224	107	107	171	3	289	403	117	29	66	1122	309	10	811	288	9
250	1	31	94	20	44	46	54	36	2	21	745	906	147	34	195	217	97	120	162	18	270	382	130	56	176	1093	304	23	812	301	11
260	2	62	77	18	60	53	44	37	4	19	761	869	134	26	169	226	123	115	152	6	408	384	117	50	140	1097	293	8	787	253	11
207	3	50	92	31	59	40	40	36	4	36	770	853	126	23	162	220	90	106	165	6	312	398	143	44	122	1073	297	10	881	268	15
263	2	62	85	37	44	49	43	34	2	17	721	926	118	36	162	224	102	109	154	7	296	364	134	56	131	1160	247	14	846	285	15
386	1	54	107	45	51	65	56	42	6	30	616	835	154	27	211	213	83	103	142	5	320	356	124	58	146	1002	273	15	789	221	11
453	1	49	119	22	50	84	65	58	5	49	677	816	198	46	256	204	93	115	151	13	313	351	133	69	180	1050	285	22	860	255	11
467	2	57	112	34	47	71	43	43	6	38	607	711	184	32	233	177	80	94	140	6	312	325	115	58	170	975	251	12	735	229	11
461	0	50	120	26	60	84	57	52	5	20	688	787	236	56	274	184	96	85	161	12	316	339	113	80	206	1079	272	22	912	260	16
408	1	68	105	16	44	69	58	37	7	59	674	766	208	41	266	179	84	112	136	10	275	329	116	80	200	1074	287	21	822	256	21
472	0	67	115	19	63	71	39	43	11	47	638	808	174	43	217	192	96	98	164	8	335	354	113	54	157	1065	274	22	847	296	25
306	1	54	82	38	42	54	35	33	10	35	680	775	159	35	221	187	97	105	147	8	356	284	119	59	148	1075	266	12	874	287	16
309	4	51	99	50	46	60	56	45	7	56	551	752	189	46	226	177	83	96	136	12	335	280	115	56	170	981	241	19	747	246	19
297	2	63	91	66	30	56	38	30	10	50	592	661	167	36	193	139	77	79	117	6	379	281	92	38	124	1009	213	19	812	289	19
189	1	53	56	86	52	31	20	13	2	21	589	746	92	21	130	166	93	93	126	1	361	304	98	31	77	1030	218	13	797	292	13
324	2	55	74	99	40	39	27	24	8	45	603	752	136	31	184	166	70	81	152	11	327	270	99	37	113	1019	223	22	870	294	16
287	0	52	60	56	42	35	29	12	12	46	657	878	133	29	144	211	92	121	136	8	360	330	112	36	97	1133	263	18	955	293	30
225	1	36	70	50	50	35	19	13	9	40	641	862	111	27	143	207	124	96	140	3	326	315	108	35	90	1155	230	14	923	310	14
250	2	56	75	49	52	44	33	14	6	61	635	709	126	18	162	162	115	81	144	5	386	281	121	26	100	1006	243	12	883	271	23
234	2	34	50	25	48	31	31	13	15	46	653	831	107	18	144	205	118	97	162	3	344	303	118	28	98	1088	268	10	974	348	15
398	3	44	135	20	58	64	29	25	9	70	593	807	175	38	243	172	110	73	126	7	382	282	115	47	158	1044	226	19	809	328	17
284	3	47	67	30	49	30	21	22	10	60	691	928	112	27	153	206	118	102	132	7	344	297	120	32	93	1236	285	18	1017	377	11
322	2	54	89	29	66	53	36	33	11	59	647	814	163	28	201	192	114	80	108	7	368	275	123	54	132	1108	249	13	923	357	15
313	1	50	100	20	55	39	33	29	8	58	586	818	163	34	179	156	108	75	111	8	349	252	100	45	121	1105	228	22	877	340	18
228	0	54	68	43	38	32	39	27	12	60	581	775	143	25	179	162	108	88	112	3	335	265	117	38	123	1105	263	9	935	284	17
213	0	54	53	39	58	38	36	27	12	43	625	834	136	36	171	195	127	82	115	5	344	290	115	36	124	1150	293	13	971	323	7
83	1	39	41	46	57	15	14	11	1	17	656	825	57	13	63	185	108	73	105	1	293	275	115	26	53	1138	271	6	1000	349	15
145	0	38	55	66	49	24	23	20	3	31	641	827	104	13	151	169	108	74	98	3	329	250	129	36	115	1166	258	20	1018	359	14
184	0	47	119	54	62	56	46	43	13	49	611	824	229	33	259	176	110	75	95	11	394	270	102	66	182	1146	263	22	934	342	13
102	2	41	62	62	47	32	23	19	11	60	601	754	117	19	179	163	75	62	93	10	342	259	110	34	104	1041	241	12	942	340	7
52	1	39	23	51	57	12	9	4	2	17	653	825	31	5	38	177	114	82	101	0	414	291	122	21	37	1144	256	0	939	335	11
192	1	27	122	30	50	45	33	21	5	40	614	841	204	42	262	173	129	76	87	10	314	283	144	80	165	1119	260	13	880	328	10
109	1	39	70	35	56	33	24	9	2	29	585	791	146	34	187	179	108	63	95	8	382	253	114	47	119	1098	227	8	948	343	30
135	3	41	108	33	61	44	31	18	7	37	652	773	172	24	225	171	113	79	98	10	356	240	115	63	136	1056	240	17	990	354	14
215	2	42	92	28	54	52	28	18	7	55	613	801	242	41	294	186	91	77	86	10	412	255	124	74	199	1090	232	17	984	375	19
92	2	23	63	34	42	18	19	10	9	21	658	805	92	24	136	172	123	60	68	9	334	250	98	33	81	1175	211	12	973	387	16
114	1	32	101	32	52	40	24	5	5	32	689	829	153	32	198	189	101	71	89	8	337	269	130	48	135	1122	231	17	996	389	15
105	0	27	111	58	57	34	29	7	11	59	641	916	146	44	214	200	118	87	96	5	370	285	118	56	127	1187	255	13	999	375	17
59	0	36	51	50	58	24	17	7	10	28	633	808	131	12	148	193	106	70	81	6	347	245	121	35	100	1126	242	6	1062	345	20
143	1	31	139	122	67	42	33	18	12	66	672	847	232	60	316	196	118	67	89	12	384	264	110	86	237	1130	248	21	969	397	12
143	0	24	104	100	63	45	32	11	10	69	652	837	199	39	259	181	112	72	67	14	369	261	94	64	201	1121	220	23	908	358	26
88	2	11	83	90	50	26	19	9	4	45	699	902	105	20	148	229	98	70	76	10	410	279	121	44	104	1175	233	6	1038	396	17
71	1	24	88	59	60	37	13	6	11	50	652	786	141	26	183	190	109	52	70	7	354	243	102	59	133	1147	220	12	1101	461	17
108	0	21	108	44	59	39	16	15	9	64	632	813	143	23	217	160	123	52	74	18	361	247	95	47	135	1058	233	13	952	378	19
148	1	17	114	51	68	47	20	13	9	69	697	860	176	36	258	196	115	67	76	17	417	250	104	62	159	1150	258	14	995	398	16
12	1	29	13	53	70	15	7	2	4	18	788	941	51	15	69	213	140	80	64	6	365	287	117	22	56	1280	244	3	1060	490	23
116	1	22	87	35	51	35	13	8	12	40	675	886	136	32	195	192	122	61	78	10	380	278	105	48	144	1081	237	8	1057	420	12
131	2	29	57	33	57	25	12	13	8	62	684	779	133	34	196	163	109	62	65	18	393	281	106	50	133	1087	248	6	956	447	11
175	2	31	100	43	59	39	22	5	9	52	700	834	138	30	194	190	108	65	78	8	368	263	104	67	147	1146	262	5	991	421	16
210	0	28	97	36	63	31	13	12	10	36	644	861	149	30	243	182	102	59	69	8	406	259	110	61	161	1107	250	5	996	427	20
122	2	37	68	48	54	28	8	7	10	31	744	898	114	25	156	181	138	84	86	6	466	275	116	41	109	1187	268	3	1069	480	17
265	0	30	133	58	54	36	16	14	16	54	731	1027	168	43	224	219	113	68	87	8	337	302	129	64	161	1253	295	7	1223	484	22
133	1	26	57	70	55	18	13	2	5	27	656	885	71	16	114	178	119	82	85	2	395	283	109	39	91	1157	247	4	1043	392	21
251	2	20	84	110	63	32	27	9	7	40	689	824	134	42	208	167	142	77	65	10	411	266	122	70	165	1077	256	6	1097	391	17
70	0	29	35	129	69	11	3	6	6	29	704	871	44	12	90	206	116	84	85	6	399	296	119	20	68	1112	260	4	1072	386	12
168	1	27	76	99	61	34	32	10	9	60	656	928	177	37	266	176	116	73	96	6	476	263	126	67	192	1119	246	16	1052	402	15
77	0	31	51	67	57	22	17	7	3	29	872	928	101	16	114	206	130	101	99	10	369	306	114	56	110	1311	305	5	1240	512	8
176	0	30	116	57	66	46	27	20	21	53	738	841	160	35	244	170	137	65	84	7	399	274	119	73	174	1138	274	14	1037	436	14
40	2	17	18	58	67	12	17	6	3	16	833	917	49	14	70	195	113	77	73	4	392	305	116	32	42	1280	262	5	1221	461	18
155	0	22	112	63	67	40	30	21	11	67	799	887	180	45	272	178	135	60	72	13	393	264	124	66	204	1198	239	11	1082	444	14
34	0	26	27	64	81	12	10	1	1	12	838	929	25	3	41	186	126	90	82	2	404	299	131	9	37	1225	259	2	1112	429	18
61	0	17	79	83	75	34	31	18	16	75	803	898	174	33	274	175	119	82	84	14	428	309	106	61	174	1191	251	14	1171	484	14
54	3	28	33	61	80	14	14	3	6	27	760	853	62	22	104	169	114	76	69	6	463	294	112	22	67	1103	243	10	1111	438	25
117	1	16	85	92	56	30	24	17	16	83	718	762	169	47	226	155	105	72	79	19	380	271	101	66	154	1053	213	8	1106	418	17
116	2	23	66	202	79	23	24	9	11	60	751	914	107	29	169	214	131	70	89	12	328	319	133	55	99	1178	241	16	1146	443	10
58	4	14	58	212	58	16	11	3	9	26	721	843	76	17	106	199	104	66	69	7	452	284	125	39	79	1091	228	6	1013	483	17
64	1	22	73	261	73	22	16	7	10	28	723	763	102	24	162	185	114	71	77	7	385	279	116	39	103	1073	222	16	1024	475	10
71	4	21	67	229	69	29	16	12	9	60	671	868	141	37	265	196	112	74	66	22	438	268	121	81	180	1060	239	23	1039	450	19
68	4	21	57	223	75	12	16	7	6	20	747	938	86	23	139	206	142	75	97	7	412	315	143	34	79	1141	263	10	1138	491	7
147	1	14	106	199	60	27	17	13	5	52	681	808	178	40	232	188	112	75	71	12	460	263	101	79	200	1062	209	23	1032	444	10
43	2	16	34	178	67	7	5	6	5	14	589	670	56	9	80	150	96	77	68	7	360	226	109	27	47	920	202	5	815	324	12
112	0	13	138	154	67	29	23	14	9	77	676	764	175	41	282	155	112	64	76	13	362	264	118	69	214	1045	186	17	1041	406	11
71	1	12	60	174	61	12	13	6	6	33	622	695	76	11	115	168	96	71	69	6	488	268	118	33	84	956	199	9	947	376	13
108	1	9	92	209	58	19	26	8	8	43	649	690	148	24	207	176	79	64	66	11	354	264	101	60	165	970	212	15	979	399	14
72	0	14	44	180	63	16	15	9	5	41	663	885	134	17	182	165	101	69	76	5	388	297	115	56	145	1254	227	12	1023	418	9
30	0	19	15	117	74	3	5	1	0	2	760	821	17	3	39	171	107	69	70	1	429	272	113	12	21	1134	230	3	1079	532	8
129	2	18	80	98	77	23	19	9	6	51	752	845	149	22	255	176	113	60	57	12	430	281	116	52	167	1141	227	12	1304	538	19
126	3	13	85	75	76	19	19	9	8	50	686	822	119	20	184	162	103	67	76	8	519	275	109	69	139	1107	232	19	1016	450	12
95	2	11	61	79	57	17	18	12	5	28	704	992	100	22	166	172	102	66	82	7	347	291	116	48	125	1221	263	16	1115	541	11
34	3	7	12	56	50	5	4	3	2	10	604	788	28	8	36	145	77	58	54	3	448	252	98	8	31	1023	220	4	944	404	9
149	1	8	73	82	66	24	12	8	8	50	808	935	104	13	150	161	116	69	58	11	378	310	106	40	128	1280	251	13	1242	534	7
128	3	10	67	77	63	17	16	9	0	34	750	887	98	17	155	163	115	71	56	9	481	278	102	37	120	1205	199	20	1079	489	18
118	2	6	64	77	83	13	13	7	1	45	800	924	93	27	160	180	113	85	63	13	433	305	120	30	110	1255	259	15	1041	529	11
129	4	5	82	92	76	19	12	8	11	42	790	900	151	39	234	170	129	59	65	11	413	312	116	70	159	1209	240	16	1129	518	8
85	3	8	43	83	75	15	16	6	12	58	735	824	157	42	212	157	97	58	44	18	407	269	105	61	182	1161	211	33	1227	506	10
77	0	17	33	87	80	6	11	7	5	29	712	901	79	26	120	172	132	74	53	3	389	293	133	33	96	1204	231	7	1153	454	6
196	3	12	83	85	78	31	19	9	7	61	797	837	181	54	233	152	116	61	52	15	398	320	116	73	196	1177	246	20	1212	555	11
107	1	11	64	79	57	12	7	7	5	53	686	831	93	32	148	126	87	49	55	17	382	283	104	55	104	1109	216	9	1036	439	10
148	0	14	58	86	75	15	2	10	10	67	676	790	127	37	162	139	110	58	47	17	369	250	123	41	130	1100	192	16	934	432	8
170	1	9	54	197	62	15	13	8	8	43	640	806	141	33	202	136	89	44	56	18	403	258	116	69	170	1092	219	13	990	421	2
63	3	19	14	229	69	11	6	5	3	23	754	798	62	20	72	139	92	58	54	6	469	288	124	26	89	1239	246	11	1183	513	8
203	1	13	132	255	75	33	28	6	7	96	673	804	210	61	324	128	93	53	57	37	397	290	100	113	236	1207	239	21	1052	466	5
105	4	16	42	251	79	13	8	11	3	37	785	819	89	22	140	119	95	51	71	12	421	292	133	36	106	1255	212	5	1195	586	9
187	0	13	96	181	66	28	21	11	20	66	696	831	213	44	295	136	99	71	60	32	402	279	161	89	221	1265	222	25	1118	500	9
212	2	15	72	139	70	22	19	6	11	76	748	911	183	41	229	165	101	66	61	21	386	277	144	65	216	1347	259	21	1245	550	6
149	3	19	73	267	61	17	13	5	12	62	702	861	141	36	174	125	78	71	60	17	435	298	109	61	158	1237	242	12	1085	500	5
40	3	11	13	137	66	2	2	0	2	1	732	849	14	4	23	143	102	56	45	4	353	288	124	5	14	1307	225	1	1208	529	3
289	0	11	166	198	67	34	31	8	10	64	736	854	233	64	306	146	108	65	56	38	447	300	120	101	276	1214	247	25	1107	432	11
158	2	14	95	153	72	23	21	9	8	41	753	861	182	40	205	154	104	68	63	23	319	300	129	68	186	1312	250	27	1178	541	2
135	3	16	52	206	100	12	13	7	4	31	705	815	118	19	144	146	108	67	52	15	388	274	131	42	123	1277	233	12	1072	497	1
184	0	9	98	231	100	14	14	6	5	19	770	889	148	36	197	153	108	86	61	31	381	308	152	47	158	1301	244	33	1215	520	5
193	1	6	116	141	89	18	19	7	6	24	751	759	160	46	190	155	97	71	53	26	334	289	120	60	152	1228	210	26	1076	483	7
153	4	12	83	74	79	20	15	8	3	21	727	853	127	24	173	148	84	68	63	14	441	295	120	46	133	1269	220	21	1092	502	10
160	1	11	100	67	69	19	23	9	9	52	696	803	139	26	158	142	104	68	60	19	366	291	107	33	131	1144	214	28	1082	501	1
201	2	4	116	65	69	21	25	12	11	65	676	688	170	48	182	146	84	69	49	37	367	240	112	70	159	1208	188	27	1018	535	3
127	3	12	55	105	70	18	22	3	10	22	681	758	117	38	145	166	74	85	65	18	366	253	119	48	157	1208	213	19	1013	405	6
130	3	10	71	103	68	19	21	9	3	47	653	751	125	27	162	137	70	76	51	32	432	272	114	45	134	1216	212	18	972	436	4
213	2	11	111	242	96	18	22	6	4	39	728	884	136	39	172	151	93	87	83	37	405	287	143	66	154	1333	208	33	1192	507	5
181	3	12	86	110	56	15	17	7	5	44	649	751	124	29	136	121	84	65	54	26	355	258	118	39	103	1211	211	24	1095	496	6
203	1	7	124	46	76	25	23	12	7	48	702	751	181	40	253	143	84	66	51	33	431	281	116	71	206	1307	185	25	1187	499	5
179	3	20	78	62	76	19	12	13	9	52	724	829	122	27	183	152	77	76	71	40	411	297	118	46	135	1675	193	15	1190	526	5
93	0	5	60	43	73	9	10	5	8	34	653	847	54	14	70	133	82	76	68	19	375	317	124	23	59	1316	233	14	1155	482	5
269	0	9	143	41	75	25	34	15	19	145	636	787	181	36	234	117	78	73	82	51	396	248	108	66	194	1256	196	34	1204	472	6
212	1	9	122	40	85	16	21	18	23	113	722	789	148	36	198	154	84	79	87	37	314	283	130	56	165	1322	246	27	1209	510	4
189	1	4	102	128	67	17	19	14	10	101	664	658	120	30	143	123	95	71	63	28	357	261	103	44	121	1263	206	25	1107	505	8
131	0	13	67	99	61	8	14	9	8	57	592	694	85	25	99	127	72	60	67	13	229	258	86	31	110	1167	166	11	1055	416	2
250	1	7	98	232	57	17	22	9	12	58	607	737	119	24	170	122	93	65	66	29	266	283	90	55	153	1171	224	13	1080	483	5
169	0	17	79	238	76	15	11	15	11	66	628	789	101	26	142	138	69	67	59	21	276	290	113	69	150	1265	223	17	1122	456	4
179	1	10	98	192	69	11	23	8	12	60	644	827	86	28	131	140	75	81	69	30	394	283	104	85	169	1346	231	21	1080	492	4
167	1	16	73	198	63	12	21	5	11	41	649	850	75	22	98	146	83	78	73	21	366	301	119	47	139	1409	212	12	1210	516	8
199	0	8	105	72	68	13	23	8	14	85	541	700	79	23	132	112	82	59	69	35	262	255	91	38	164	1197	183	13	1002	398	7
258	0	4	133	150	60	15	20	11	16	84	617	732	77	22	125	114	86	56	61	27	196	269	112	60	164	1322	241	17	1096	521	4
154	0	9	65	43	67	9	19	9	6	66	468	637	90	20	123	110	48	65	64	21	327	230	74	44	107	1014	167	22	862	350	12
216	0	4	89	49	58	19	29	23	22	105	628	716	147	42	216	132	77	65	59	47	205	305	95	49	164	1324	219	32	1073	456	2
94	0	5	46	47	84	8	10	8	10	60	629	781	61	19	88	133	78	62	85	18	308	290	126	28	65	1330	222	11	1171	473	6
250	1	7	98	50	97	21	32	8	19	96	669	772	152	37	222	124	69	85	65	39	366	294	118	46	182	1297	217	32	1118	492	11
164	0	5	107	38	69	18	27	17	18	71	554	671	111	24	131	113	65	64	57	31	349	246	91	43	104	1266	199	11	1003	401	5
318	2	5	166	58	89	36	33	19	28	131	677	813	228	54	313	142	89	85	72	47	385	328	146	65	226	1405	262	43	1090	471	8
64	0	7	40	58	77	4	11	5	7	29	666	808	48	12	51	120	84	83	85	5	291	324	112	14	46	1383	220	9	1164	481	4
215	0	7	106	60	88	23	25	13	16	98	638	747	160	45	201	123	66	82	60	23	358	313	138	52	166	1351	228	36	1057	450	11
55	0	13	13	63	74	3	7	1	7	11	596	757	26	9	44	110	61	79	69	10	290	306	105	10	31	1269	235	8	1078	447	7
232	2	11	124	44	76	23	31	16	25	135	612	756	193	40	252	125	87	75	64	38	223	319	127	59	172	1311	254	33	1065	452	8
99	0	3	67	21	70	10	13	5	16	96	574	712	112	18	141	91	59	83	73	16	205	284	103	33	107	1353	204	28	1059	454	5
172	0	18	99	32	99	13	23	22	20	116	688	839	167	30	205	125	66	89	81	25	393	360	134	58	167	1455	222	41	1227	514	11
97	0	6	85	31	65	16	21	14	18	101	659	745	131	33	178	105	66	98	109	32	217	330	112	42	134	1426	219	34	1182	439	6
132	0	12	174	34	104	38	49	26	43	201	663	764	267	63	360	115	80	76	93	39	345	340	113	88	265	1440	219	61	1177	469	11
114	0	1	117	28	87	17	42	24	16	179	663	724	172	41	218	115	50	80	94	28	26	324	116	67	145	1353	225	23	1083	426	0
141	0	12	145	25	92	25	53	28	47	255	666	833	248	61	270	127	78	85	99	31	345	357	133	91	214	1447	234	40	1223	492	13
77	0	11	65	35	101	17	40	19	27	130	633	743	132	32	148	124	68	79	109	15	274	330	90	83	144	1339	211	24	1139	461	11
75	0	13	104	60	84	12	37	21	26	139	631	789	141	31	182	122	72	76	107	21	242	322	115	76	144	1397	239	31	1099	409	8
74	0	12	90	51	80	15	34	9	15	121	580	735	132	32	175	108	60	90	68	14	214	337	111	72	115	1356	237	13	1036	403	13
62	1	18	53	62	97	8	22	16	16	81	669	849	117	19	117	127	70	80	108	7	324	382	115	56	83	1428	236	10	1104	385	11
124	2	20	117	37	127	11	34	25	24	114	721	996	163	46	175	139	107	111	101	14	264	419	157	89	116	1545	302	30	1077	381	9
79	0	10	48	38	115	7	21	10	15	69	605	774	80	16	90	131	78	89	85	10	178	338	125	83	55	1421	254	23	1155	384	6
95	1	12	128	30	136	21	35	21	23	167	874	1173	183	55	203	197	125	138	111	17	273	468	180	184	139	1850	328	24	1422	477	10
73	1	7	69	15	70	9	26	15	15	97	628	816	154	32	157	142	85	81	89	12	269	354	115	164	122	1272	275	13	1009	411	10
97	0	4	95	11	67	13	30	23	19	77	536	704	140	34	154	104	74	83	81	13	65	292	128	107	95	1250	216	24	1012	369	2
83	1	10	88	11	80	20	33	29	22	111	633	794	188	40	195	110	83	89	97	14	198	353	118	154	159	1398	243	24	1026	365	9
75	2	16	114	13	88	16	33	27	27	140	653	856	199	35	189	135	86	90	95	16	248	338	129	177	182	1441	239	29	1102	412	7
78	0	17	65	42	79	17	30	21	20	107	568	787	168	35	175	134	78	92	76	13	210	333	131	161	131	1323	215	32	1012	339	5
97	2	26	116	69	75	17	43	37	18	135	651	779	210	51	210	153	83	94	87	18	381	383	127	213	161	1381	238	37	977	402	14
41	1	6	17	41	90	3	12	9	9	50	590	819	51	12	51	147	78	83	87	1	169	361	120	111	40	1310	270	9	985	354	6
52	0	13	56	18	87	12	14	25	17	140	565	828	123	20	117	131	113	79	78	15	285	354	96	156	92	1479	225	19	1096	369	8
131	0	24	123	27	84	19	45	32	26	195	567	800	198	39	214	153	91	86	76	19	333	347	102	336	170	1385	238	35	1025	400	9
104	1	35	92	55	104	15	35	18	28	165	619	815	177	37	174	157	86	100	85	14	479	342	117	316	130	1433	239	31	1035	385	13
78	0	37	94	52	95	14	31	24	22	145	642	783	157	31	174	146	95	95	79	15	526	341	123	182	118	1366	257	17	1046	342	25
84	2	18	100	39	93	20	40	47	14	133	612	811	158	34	198	139	94	96	86	13	329	353	118	251	166	1490	231	24	974	391	18
85	0	21	69	34	79	15	22	21	5	85	508	638	130	18	155	121	73	73	72	18	327	280	123	205	125	1126	204	21	821	272	15
66	1	10	66	45	90	13	32	20	11	56	591	759	100	21	121	130	67	81	74	10	345	331	113	265	114	1403	201	17	1070	410	20
105	1	18	104	43	115	21	37	33	11	142	648	895	191	48	228	176	95	94	98	13	363	352	147	282	181	1497	238	26	1150	429	17
74	0	10	65	45	105	8	27	36	18	130	554	829	145	28	153	145	85	83	92	10	294	323	130	105	101	1374	250	22	1142	378	13
75	1	17	65	36	122	13	36	24	17	129	658	874	121	30	154	154	103	84	106	12	298	337	144	232	106	1463	261	28	1137	409	15
122	0	19	129	42	113	22	39	35	18	154	612	761	177	56	223	169	79	84	90	8	336	350	126	294	180	1384	212	40	1047	401	15
44	1	5	46	37	142	11	26	11	18	84	602	822	85	17	118	145	106	91	104	6	193	358	119	124	60	1408	232	17	1061	390	10
36	1	14	40	59	118	7	23	8	13	69	566	699	77	18	77	134	83	86	85	5	346	355	108	411	75	1251	243	15	1019	322	16
129	1	7	148	68	94	21	59	47	41	159	585	731	210	46	248	135	83	82	80	20	255	342	134	471	208	1326	205	45	979	345	7
64	0	9	43	52	91	8	18	10	8	52	468	653	79	17	111	119	72	64	78	5	272	298	90	240	100	1136	171	15	814	289	14
67	3	16	85	61	110	11	31	31	9	52	558	743	115	26	143	128	70	79	82	10	294	331	124	231	121	1262	208	33	1031	318	7
64	3	19	77	39	97	13	31	35	15	63	542	747	133	23	130	157	89	79	75	10	254	347	125	299	111	1271	214	29	1027	268	18
43	3	11	58	51	132	12	26	17	12	39	591	782	82	19	123	174	83	89	80	5	286	389	153	299	86	1348	246	17	1043	297	21
75	2	3	125	47	123	21	52	49	15	85	542	788	181	51	243	142	101	88	81	14	54	317	135	628	194	1286	245	50	984	275	0
68	2	18	86	35	117	20	45	57	15	88	530	716	170	41	187	136	86	76	86	8	278	303	146	315	146	1271	183	43	1002	281	14
89	2	13	139	26	116	24	73	66	23	101	639	772	209	74	262	185	96	73	84	26	192	349	131	573	208	1433	259	56	1057	336	13
126	1	17	169	48	99	26	84	81	25	132	545	760	249	57	254	171	79	74	90	14	168	316	130	533	262	1270	230	68	1032	295	9
148	2	43	120	72	89	28	107	94	29	152	534	786	265	75	263	161	95	77	97	18	396	328	138	523	379	1271	226	70	973	312	12
140	0	7	91	76	122	25	98	89	27	130	586	698	217	63	228	148	105	82	88	23	79	355	136	517	295	1345	211	58	991	311	6
139	1	10	102	64	125	34	92	83	34	160	475	684	217	73	260	124	97	80	71	19	221	321	112	601	351	1197	209	65	861	251	10
69	0	3	59	48	118	14	39	38	17	64	573	733	129	29	138	152	86	87	95	11	91	316	120	315	117	1305	235	32	982	334	5
108	2	12	90	58	129	23	62	42	25	96	537	734	190	52	228	141	102	81	108	13	315	302	115	517	212	1246	214	57	950	279	23
129	1	6	120	34	116	19	67	41	24	110	531	697	201	40	307	146	79	63	99	16	101	309	119	70	178	1225	206	65	959	251	9
50	2	21	39	29	109	8	20	16	16	41	541	719	62	17	93	154	86	76	83	5	270	348	121	337	89	1228	236	17	870	271	18
94	2	19	52	25	115	18	35	27	12	75	488	720	156	34	179	129	76	81	104	11	278	307	101	661	158	1240	191	35	981	286	16
68	1	24	78	38	131	20	43	38	12	48	542	767	121	46	152	147	87	66	118	12	298	350	112	555	126	1272	233	24	977	308	19
64	0	15	46	56	123	14	38	37	14	45	539	668	93	43	132	146	94	84	96	9	305	315	121	772	100	1114	239	36	849	254	21
89	2	32	67	44	136	23	44	39	14	84	546	707	139	37	201	150	71	82	101	6	371	315	121	607	160	1213	230	40	927	282	19
113	0	10	86	46	119	18	59	32	14	91	548	707	170	55	223	161	69	82	97	7	166	344	107	682	182	1210	229	50	948	261	8
68	1	31	17	37	144	2	7	14	7	14	497	711	29	9	38	153	58	68	107	4	356	318	99	577	47	1188	193	10	960	276	16
237	1	16	139	33	114	46	70	54	26	167	525	710	299	89	371	148	69	67	91	17	224	311	123	405	232	1246	203	91	959	296	15
208	0	12	136	41	97	24	81	78	25	163	529	756	283	86	325	158	56	63	101	10	185	310	131	179	185	1206	203	71	1003	253	2
140	3	30	116	13	126	22	74	61	20	117	531	748	205	75	226	134	76	85	106	10	375	327	105	67	182	1179	207	54	1024	279	21
149	0	7	80	17	109	15	47	45	23	64	511	716	139	37	164	161	75	65	132	8	136	341	117	37	147	1210	220	39	957	284	3
80	1	31	71	15	115	18	32	39	19	90	528	721	119	44	163	185	70	65	101	9	472	319	124	56	121	1255	192	34	1009	257	20
77	0	16	62	27	106	12	26	34	9	52	487	647	87	38	137	141	65	71	81	3	212	303	93	60	76	1013	206	37	841	219	6
105	1	42	71	23	139	24	45	31	9	47	521	752	127	39	177	175	87	74	119	11	389	348	111	76	122	1223	223	60	1045	257	19
98	0	6	70	14	136	21	37	36	5	37	542	805	128	36	164	173	82	78	114	6	67	356	113	57	105	1338	197	62	1105	276	4
111	0	17	88	18	115	26	48	32	11	62	477	664	145	61	177	167	64	61	103	5	285	310	90	49	117	1161	191	51	903	249	15
93	1	11	71	14	146	16	35	32	8	60	483	636	121	38	187	151	78	71	105	8	108	289	84	69	88	1124	199	57	887	248	3
88	0	1	83	15	123	18	48	31	16	61	452	561	137	46	160	144	68	51	78	10	69	246	88	46	131	1018	174	49	830	211	4
73	0	13	50	14	151	13	24	16	10	54	595	704	59	16	107	195	84	96	76	8	348	325	130	27	68	1338	233	35	1024	267	7
144	1	16	109	22	149	22	48	32	26	141	528	653	179	58	250	171	77	74	70	7	285	336	114	76	134	1222	216	62	931	235	11
190	0	16	153	16	175	28	61	50	38	146	549	653	266	78	332	191	74	66	64	6	332	321	96	183	193	1235	215	102	954	261	12
153	0	6	113	32	157	20	59	54	35	138	485	675	196	46	229	168	79	95	82	12	214	308	111	69	155	1157	230	92	843	203	10
133	0	9	86	23	156	23	56	40	31	142	508	669	202	57	224	205	72	76	93	9	255	324	83	81	192	1260	201	81	862	250	11
135	4	17	86	20	168	23	55	46	33	172	559	742	161	74	234	193	92	91	92	7	428	331	117	82	150	1376	232	72	935	296	28
132	0	0	79	18	119	18	60	49	20	128	527	732	136	45	158	191	93	90	88	6	23	333	116	55	93	1301	211	64	901	293	2
143	0	6	147	22	134	32	32	50	27	135	538	695	197	72	271	182	85	96	102	5	266	324	119	104	140	1264	228	116	820	260	10
45	0	7	48	14	142	12	25	14	18	68	473	636	53	28	77	188	77	66	89	0	176	289	100	47	46	1189	207	35	746	248	5
65	0	2	78	42	143	19	27	24	14	107	466	617	112	39	154	151	57	72	73	2	55	287	96	46	81	1110	190	52	753	223	2
109	1	13	104	35	113	25	40	24	25	190	444	551	154	60	227	153	64	73	97	3	270	270	123	68	98	1035	185	60	687	193	9
76	0	0	87	42	117	27	40	29	31	174	514	701	181	57	214	200	71	76	126	5	0	313	115	89	123	1297	220	69	850	310	0
54	0	9	53	24	146	15	24	21	11	86	546	633	94	29	101	184	62	85	85	3	333	320	141	35	67	1250	218	30	781	246	23
82	0	2	88	20	73	22	33	26	16	143	283	392	99	33	189	86	38	38	76	6	55	175	52	49	83	708	117	52	472	164	0
71	0	9	65	38	124	14	19	11	18	118	378	530	90	34	108	110	43	66	86	3	247	234	86	52	59	968	182	29	630	197	7
123	1	11	118	13	115	22	38	31	39	217	426	619	189	60	264	136	59	60	114	5	264	267	92	105	200	1049	192	65	682	236	12
127	0	2	111	28	112	28	48	48	52	267	393	546	256	83	282	123	40	55	102	2	32	237	89	95	286	929	160	72	659	191	4
114	0	14	104	32	150	26	40	36	49	203	525	637	203	54	250	150	50	60	105	6	260	293	105	91	211	1127	199	85	805	265	11
103	1	6	105	37	142	28	61	46	57	276	465	642	268	62	280	152	52	78	94	9	70	270	101	128	325	1144	173	102	775	235	1
126	0	12	108	48	157	23	44	34	47	187	514	640	204	69	218	166	64	69	112	5	265	301	104	122	284	1235	204	102	879	229	15
195	0	2	116	64	151	37	49	40	65	205	511	601	264	83	243	164	73	74	84	6	94	271	122	145	349	1202	203	130	778	238	6
198	1	4	139	58	159	17	46	39	47	187	462	597	176	69	218	160	62	63	82	3	180	280	113	96	235	1181	205	112	820	231	11
135	0	12	90	50	146	22	39	32	32	130	496	604	155	37	188	149	70	84	112	2	323	284	94	61	139	1153	191	87	745	230	19
116	0	9	83	34	166	17	30	15	25	111	521	675	131	32	156	162	66	72	93	5	223	295	108	49	95	1267	221	82	853	269	11
123	0	1	93	37	157	18	36	20	31	147	558	692	124	48	148	200	81	113	79	7	27	397	133	46	113	1330	266	77	829	239	2
145	2	23	106	37	165	27	33	31	39	191	481	607	210	51	231	147	59	62	97	1	382	277	105	81	141	1185	224	109	788	245	17
110	0	4	98	24	131	18	31	27	31	172	468	611	160	37	214	137	72	82	102	6	32	276	101	74	149	1094	211	109	712	198	2
110	0	17	74	20	127	9	27	21	40	103	464	644	111	35	156	166	78	83	99	0	281	274	100	50	103	1159	215	70	775	238	13
150	0	5	90	19	126	26	45	37	25	157	492	625	189	55	243	164	87	81	82	3	127	272	101	72	140	1157	215	131	770	230	14
114	1	9	90	19	132	24	39	27	13	131	454	612	183	60	216	156	64	74	87	2	221	275	100	75	129	1163	215	106	697	232	7
167	0	0	124	11	128	30	63	27	46	218	430	553	220	68	260	132	74	76	82	6	0	246	105	87	203	1012	208	134	639	207	0
153	1	24	142	26	153	26	56	56	24	185	514	637	244	75	258	151	76	72	92	5	362	299	107	104	247	1123	231	116	825	236	17
87	0	2	78	28	91	22	42	25	17	110	267	366	153	49	144	97	46	34	51	4	90	165	62	48	135	677	126	70	464	139	5
124	0	8	79	55	109	21	38	36	27	170	431	558	190	57	203	142	72	73	83	2	271	276	90	71	202	1014	185	93	620	218	13
131	3	7	101	39	130	19	60	26	28	181	436	663	198	66	243	159	86	84	118	4	140	283	106	80	216	1176	199	101	731	205	10
119	0	7	82	30	146	18	36	32	28	162	478	515	139	37	187	134	68	73	79	3	212	254	92	65	138	1057	174	84	649	199	9
162	0	0	106	28	149	22	53	22	35	197	492	604	154	47	228	152	68	90	90	5	0	292	90	53	143	1193	223	92	757	241	0
141	0	24	92	27	167	20	52	38	17	138	476	645	163	56	213	165	73	70	102	8	317	299	95	53	151	1183	207	92	737	225	15
120	0	9	96	27	152	25	34	34	29	150	465	613	133	51	180	167	67	50	80	3	176	268	99	52	114	1223	188	76	721	210	7
97	0	8	96	46	152	19	49	45	21	156	489	628	118	40	147	172	80	87	86	1	157	297	109	39	72	1159	204	66	691	200	10
152	0	29	107	36	178	20	52	42	34	200	506	647	174	65	252	175	90	74	111	2	321	292	126	49	127	1142	218	96	761	236	16
125	0	1	112	37	168	24	39	41	29	214	506	607	123	45	140	175	66	72	101	1	53	273	118	45	109	1152	222	73	743	236	1
108	0	11	98	15	131	21	42	43	25	203	464	597	137	46	168	168	55	75	92	1	201	262	102	50	97	1095	188	56	741	223	10
139	1	7	116	15	142	18	41	47	24	266	492	632	184	66	244	207	65	86	90	3	149	272	110	49	133	1203	210	90	761	265	6
92	1	3	74	18	119	20	40	36	20	156	445	658	98	47	122	172	79	69	104	2	59	270	123	23	76	1146	265	51	717	249	1
170	1	20	140	10	98	27	61	50	42	317	481	577	254	87	303	170	58	70	86	5	284	277	97	67	160	1196	196	122	781	233	15
123	0	10	97	15	125	11	32	37	24	200	499	631	165	39	194	180	99	98	103	3	244	366	142	38	98	1254	228	67	729	192	19
98	0	0	91	15	160	23	37	29	35	178	481	673	122	37	148	153	83	80	95	3	0	305	95	32	101	1160	227	67	772	231	0
163	1	16	172	13	141	31	69	43	36	311	443	601	227	67	255	176	87	80	95	4	208	288	98	50	199	1062	236	128	695	249	7
203	0	12	177	21	155	33	59	49	24	281	420	589	251	81	275	179	67	76	94	1	150	271	113	92	259	1089	205	128	690	206	7
102	0	2	70	16	83	14	28	25	27	158	271	328	139	29	141	100	28	40	65	0	66	165	59	37	130	676	117	66	375	137	0
0	0	0	0	0	0	0	0	0	0	0	0	0	0	0	0	0	0	0	0	0	0	0	0	0	0	0	0	0	0	0	0
62	0	0	31	4	82	12	19	9	10	69	297	381	41	13	83	87	30	38	59	3	0	179	64	16	48	794	136	24	476	135	0
125	1	12	78	12	127	24	29	34	19	142	466	617	107	50	131	161	62	75	124	4	225	289	97	40	100	1141	227	62	704	231	14
150	1	15	78	8	136	41	35	31	21	148	429	572	125	55	192	152	76	73	116	4	251	289	102	46	124	1121	218	65	681	217	13
116	0	8	38	8	132	11	20	6	11	95	503	617	84	31	103	189	63	79	125	1	117	289	110	36	56	1169	215	36	778	246	9
167	1	23	93	8	118	28	31	15	15	164	400	621	116	41	155	169	67	66	102	1	288	263	88	45	114	1056	200	67	631	203	13
104	1	6	68	12	128	18	25	13	5	100	483	609	60	29	109	187	63	71	128	1	104	314	102	25	74	1249	192	56	743	238	6
81	1	14	47	10	118	9	18	13	7	103	457	646	45	18	77	184	72	73	100	2	162	298	105	27	55	1230	220	48	728	242	5
107	0	1	74	13	146	26	27	30	10	180	411	616	94	36	121	155	67	85	120	1	17	301	95	48	88	1128	205	84	702	184	2
106	1	16	77	9	135	31	20	20	12	139	515	619	81	39	135	177	73	88	134	3	190	287	109	25	75	1217	224	69	809	243	11
119	2	18	89	22	104	31	18	29	10	141	442	577	62	21	111	165	65	85	118	2	216	277	84	25	92	1138	221	68	682	199	17

## Sheet: cont PTX rep 3
A8111	A8112	B8111	B8112	C8111	C8112	A7211	A7212	A7213	A8211	A8212	B8211	B8212	C8211	C8212	C8213	C7311	C7312	B8311	B7411	B7412	B7413	C7411	C7412	A8411	A8412	B8412	A7122	C7121	A8121	A8122	B8121	B8122	A7221	A7222	B7221	B7222	C7221	C7222	A8222	B8221	B8222	A7321	B7321	B7322	C7321	C7322	B8321	B8322	C8321
23	45	160	24	5	2	52	78	7	321	88	186	118	49	81	79	153	43	682	585	69	239	131	146	238	412	933	0	26	183	130	291	94	18	8	160	149	84	173	32	616	182	90	267	95	6	3	774	147	269
30	52	142	26	23	4	66	69	18	286	100	184	136	33	86	55	148	43	636	505	56	247	142	159	205	370	864	1	17	198	144	280	99	28	7	186	130	68	155	39	596	181	111	270	63	8	6	772	203	310
26	51	131	21	12	1	65	66	18	286	88	198	122	42	85	56	133	46	579	577	63	210	131	134	222	392	877	0	15	177	153	300	82	15	8	165	162	54	182	25	567	177	100	268	64	6	3	791	195	295
18	43	149	15	15	6	70	60	27	315	89	227	154	57	88	49	123	46	687	531	50	197	120	145	215	375	863	2	24	204	125	292	121	33	8	160	180	69	168	46	555	154	79	258	79	3	4	769	196	313
19	45	146	24	22	4	73	54	8	316	76	181	140	57	111	71	128	43	700	585	60	221	142	159	240	426	796	1	24	214	139	285	110	23	7	163	197	47	187	47	612	179	81	262	89	7	2	763	192	305
17	46	143	19	15	4	74	60	19	338	105	206	135	46	75	58	119	51	715	599	77	255	153	163	273	467	761	1	24	224	177	301	127	33	10	140	226	65	182	45	588	193	97	244	82	5	6	800	210	296
25	51	150	16	19	4	90	66	21	332	112	199	144	40	80	50	126	47	798	586	71	254	159	157	224	397	713	0	20	196	179	331	106	40	10	172	197	50	178	60	632	151	72	239	81	9	7	759	173	311
20	46	137	25	27	2	58	76	17	349	105	188	131	53	84	67	130	41	785	563	69	252	144	144	220	423	676	0	28	180	145	306	91	24	9	151	197	67	160	40	538	173	79	233	78	7	3	785	193	270
22	66	150	25	7	1	59	62	24	351	97	234	131	45	87	78	130	38	830	570	60	225	147	133	249	413	784	1	24	215	140	331	115	20	12	187	198	63	148	34	568	175	122	248	80	11	8	813	164	346
30	50	157	32	15	1	66	64	17	354	108	224	126	53	96	63	125	50	802	646	63	228	153	153	218	477	778	1	19	189	162	309	122	37	9	167	167	60	173	35	551	166	87	247	89	9	8	737	153	291
26	50	133	24	11	0	63	57	12	365	92	201	105	54	81	62	122	53	813	690	65	266	172	154	237	416	754	1	22	199	150	261	108	23	6	141	202	80	178	43	562	147	96	236	65	7	11	772	146	309
26	43	162	29	10	2	67	53	17	296	100	238	121	65	71	66	132	42	845	678	54	279	164	163	200	424	757	1	18	192	130	302	129	38	13	146	196	62	164	34	539	172	97	239	81	7	5	797	155	308
27	50	150	21	16	0	73	50	14	305	92	231	115	61	82	74	123	44	832	602	60	252	161	169	187	380	727	0	23	194	156	299	141	21	9	155	195	57	181	28	520	166	94	268	65	10	11	819	157	353
24	65	141	21	6	0	69	62	21	379	86	177	103	63	69	60	114	34	805	566	53	266	153	157	209	443	617	0	22	213	169	245	113	21	3	172	199	70	161	32	529	163	88	251	62	10	8	708	151	319
31	40	140	29	4	0	63	67	13	338	82	227	147	55	78	56	108	44	865	584	69	264	151	140	213	339	589	1	17	204	141	288	140	19	3	174	216	62	154	37	623	191	87	242	65	6	15	844	183	325
32	48	169	17	8	5	73	56	18	426	99	222	112	52	77	63	93	43	920	557	49	253	168	159	259	458	656	0	26	207	143	297	96	20	10	157	199	68	144	38	610	212	91	268	82	13	8	848	205	310
35	60	148	29	7	4	99	54	16	357	86	221	141	49	81	58	102	33	906	615	43	268	176	124	228	362	620	0	23	207	160	312	121	21	12	145	178	58	155	34	600	168	89	245	76	11	11	810	166	343
26	44	141	17	5	1	82	61	27	327	107	181	105	31	84	85	116	32	882	531	63	226	156	148	250	370	626	1	20	210	122	259	105	30	9	128	201	62	165	50	590	183	96	248	68	7	7	781	194	337
31	43	157	24	10	1	83	63	23	311	63	215	129	38	66	61	114	32	871	548	55	240	162	174	201	361	598	1	21	208	140	281	129	29	7	169	245	57	174	51	633	189	91	277	97	11	7	763	186	352
21	55	115	21	4	1	67	77	16	352	76	203	127	48	67	47	102	30	900	620	58	265	140	158	231	427	645	0	13	237	134	277	129	24	8	153	225	75	165	47	599	164	85	255	97	10	6	779	178	337
25	53	128	27	3	1	73	54	17	323	74	235	144	48	70	65	102	40	934	609	42	259	180	183	209	364	653	0	18	188	127	339	120	16	13	148	203	68	158	59	611	191	93	244	104	11	9	850	211	320
29	53	137	27	5	1	73	67	18	334	77	268	128	44	81	70	115	34	984	656	51	283	179	160	230	364	708	2	19	185	148	320	152	34	9	170	194	67	178	57	623	205	97	295	84	8	10	820	222	392
23	51	127	21	5	1	79	70	18	376	115	261	138	54	84	77	101	33	1027	631	55	289	180	170	205	334	715	2	24	176	147	282	128	23	10	151	193	68	153	61	620	170	99	256	88	8	6	828	186	397
37	54	147	21	2	1	69	49	15	362	101	258	142	55	75	67	112	37	1020	685	60	310	173	169	213	350	771	3	14	177	130	312	137	19	8	171	220	50	153	46	644	180	105	265	101	3	10	840	196	375
24	49	139	19	2	1	81	69	19	369	106	229	121	38	90	61	115	43	962	680	61	236	174	158	226	384	636	0	29	207	147	297	111	23	3	177	206	67	155	35	527	190	92	251	105	4	5	748	173	416
32	54	134	22	2	0	88	58	18	379	101	273	147	44	67	78	115	33	1018	709	62	262	173	180	210	436	705	1	30	219	150	295	120	24	8	141	191	61	163	45	530	174	94	240	106	4	5	857	201	435
29	55	142	23	2	0	102	53	29	391	118	237	143	39	70	44	114	33	973	729	70	326	185	159	241	521	749	1	23	245	146	305	127	18	8	166	164	69	172	36	550	157	101	271	96	8	7	841	164	507
31	60	143	18	4	0	88	45	18	378	120	245	125	46	61	55	115	29	871	696	77	323	143	166	173	402	735	2	20	192	118	298	147	20	3	172	202	47	117	39	510	171	80	268	95	3	8	806	155	504
28	43	148	21	9	1	76	68	15	335	100	269	144	38	77	63	110	29	930	629	79	261	162	192	221	434	698	0	20	192	136	314	122	26	4	161	232	66	153	24	501	158	92	252	95	13	6	838	143	502
30	60	137	25	8	0	78	66	11	360	107	236	137	29	64	67	92	36	946	687	76	240	187	152	212	450	716	1	26	199	150	281	125	22	9	157	189	54	130	35	488	172	93	259	92	5	5	775	182	459
26	42	144	33	4	0	80	58	16	355	99	267	140	40	78	48	94	38	940	647	57	238	163	150	203	356	729	0	27	173	129	338	128	26	4	160	210	60	154	29	549	183	97	247	129	4	4	903	173	502
33	58	174	29	7	1	91	65	19	341	103	261	155	32	65	59	101	38	909	697	45	265	172	161	173	466	744	2	26	188	129	311	134	18	5	151	189	61	152	32	578	200	90	251	107	8	5	838	170	414
32	56	149	32	3	2	77	78	22	374	134	235	126	36	84	55	104	26	942	750	61	248	178	154	212	389	716	2	15	182	152	289	100	24	6	160	186	45	123	43	568	152	79	245	123	3	5	712	150	530
36	61	148	31	6	6	69	74	17	354	108	290	147	53	72	66	86	38	937	697	84	280	180	189	197	432	748	1	25	191	143	297	119	26	3	165	208	64	144	43	527	183	87	271	92	5	4	780	143	537
16	38	90	18	2	1	36	40	11	216	66	143	98	22	52	40	58	11	594	392	50	150	92	103	128	264	428	1	12	134	92	183	73	9	5	87	100	28	83	21	300	118	51	168	50	3	1	465	95	349
20	28	58	12	1	0	29	28	7	192	51	82	58	20	19	32	36	18	373	226	41	98	69	77	80	175	325	0	10	87	44	137	48	8	3	72	57	32	59	20	192	61	50	89	39	4	0	282	49	220
28	82	150	31	8	2	98	95	34	585	162	260	155	43	90	89	134	52	1066	760	83	318	191	198	193	355	705	2	33	212	132	321	124	45	6	154	220	61	188	63	504	185	108	314	66	7	8	865	153	639
38	68	155	25	11	3	91	90	64	452	123	266	143	76	107	104	122	44	942	720	83	309	201	168	189	434	646	5	31	212	117	294	137	80	36	175	229	82	168	72	592	168	130	324	71	5	7	793	99	693
59	69	140	20	8	2	78	84	62	449	116	307	158	75	79	100	127	56	1046	778	72	310	189	212	257	561	678	3	34	216	139	328	115	71	40	161	204	71	173	77	599	168	111	332	70	7	6	761	166	697
57	87	137	20	12	0	59	78	62	409	133	289	193	63	90	109	138	51	1121	707	94	279	222	215	215	409	657	2	49	252	154	288	128	77	32	222	249	72	190	71	585	187	104	383	83	5	10	818	121	622
70	99	150	36	7	0	52	72	53	512	127	302	194	78	113	124	136	42	1121	651	80	301	254	228	254	579	746	1	47	293	230	311	117	63	27	217	233	67	191	70	575	195	82	324	86	8	4	835	134	645
40	104	160	19	12	2	55	63	65	473	142	350	164	71	102	105	133	43	1175	605	85	273	226	241	235	471	878	2	36	272	195	337	132	68	23	202	273	72	199	62	581	166	112	340	101	2	5	820	129	628
56	111	154	26	10	0	65	67	42	550	161	401	207	80	134	124	139	63	1306	626	78	254	189	200	281	500	870	0	38	316	255	384	142	63	28	206	286	107	209	66	618	208	106	321	132	9	7	944	159	616
51	101	177	41	10	1	65	72	50	459	155	341	209	112	172	133	167	63	1283	645	122	267	221	203	264	588	879	2	32	356	267	401	170	69	29	247	258	104	207	74	651	220	118	355	132	5	4	1003	159	688
51	91	217	53	23	1	73	95	65	434	161	381	253	130	182	181	170	78	1329	471	113	256	203	236	229	543	850	1	60	330	265	481	208	73	29	218	245	105	244	58	654	216	142	390	138	7	11	1190	226	773
52	101	213	61	29	3	67	79	53	491	162	376	249	132	177	223	176	84	1394	520	129	208	232	197	275	729	941	4	55	377	298	459	215	63	37	221	226	109	231	86	754	230	123	328	168	18	8	1208	181	835
66	107	255	55	35	7	58	66	52	438	188	445	237	144	138	228	177	78	1398	538	142	272	235	184	249	628	915	1	52	358	297	516	217	85	22	225	210	125	246	106	748	244	107	345	161	10	16	1237	208	841
63	105	257	42	35	9	38	80	44	432	164	432	275	144	148	258	164	69	1369	516	133	223	203	184	253	664	858	2	51	387	271	515	254	81	32	214	213	107	210	108	763	258	95	342	168	17	15	1301	223	799
70	106	276	39	34	14	37	69	55	387	179	448	297	182	131	247	180	77	1374	563	152	273	236	258	244	555	829	5	68	361	244	600	268	80	34	217	261	115	233	108	741	242	118	326	216	17	13	1349	188	847
67	102	261	47	32	12	45	69	58	389	188	451	287	154	141	257	150	67	1380	528	158	269	195	225	227	553	852	1	60	379	233	609	279	62	46	268	338	119	214	96	731	266	110	394	232	19	15	1320	245	787
72	116	284	49	37	10	47	61	54	366	153	387	274	181	140	284	164	80	1433	589	120	262	209	238	215	552	885	2	59	410	227	657	306	76	34	231	265	146	227	99	738	252	118	318	223	12	19	1276	284	780
64	122	289	55	42	14	47	61	56	420	191	380	267	192	141	262	166	73	1491	581	119	234	210	235	300	654	885	4	76	419	295	712	328	71	39	269	319	125	218	117	810	305	116	331	246	9	18	1398	254	810
79	112	254	69	47	8	57	60	47	382	166	320	289	160	122	276	170	66	1342	583	153	274	191	188	257	611	881	1	50	375	311	574	310	71	33	270	308	130	189	93	648	258	112	300	204	12	17	1145	366	785
66	121	222	80	62	21	44	53	59	386	144	325	287	182	124	280	149	68	1220	626	133	250	206	205	254	644	936	7	75	398	298	478	272	82	32	259	290	110	221	95	568	211	101	278	144	11	13	956	371	953
65	117	264	69	51	24	44	66	68	357	172	316	266	163	130	263	189	73	1327	616	158	249	209	255	250	580	993	6	61	395	256	562	340	85	35	272	263	140	198	87	594	213	113	248	119	16	15	1085	387	1048
57	112	248	86	52	15	46	80	60	321	172	311	263	158	129	278	182	88	1300	589	168	265	233	244	233	542	1036	2	59	381	241	562	292	91	50	246	201	136	214	87	547	201	156	217	118	14	21	1034	395	1121
87	119	245	92	60	12	55	78	63	371	154	299	298	145	131	289	184	75	1253	589	154	288	210	231	254	563	1070	1	69	380	239	553	330	89	43	215	235	132	223	97	536	225	127	239	113	9	7	1049	429	1069
61	109	270	84	46	16	55	87	75	349	155	294	265	174	129	264	198	73	1354	593	145	287	227	247	268	595	1180	4	65	374	236	586	343	107	35	261	234	103	183	118	553	231	128	244	95	12	11	1038	436	1018
60	100	266	69	27	17	68	85	63	322	151	286	297	162	116	252	173	74	1259	678	150	213	230	239	234	534	1141	10	61	393	192	562	375	82	34	235	229	111	197	113	542	254	111	233	101	14	22	1053	363	1007
66	115	245	80	39	8	57	87	76	348	135	318	253	157	122	263	163	91	1257	662	146	294	225	241	257	646	1220	2	65	395	254	549	347	78	34	268	209	100	194	118	535	235	136	240	94	13	16	988	418	1011
58	91	257	104	37	15	57	88	63	302	116	290	283	164	126	250	185	70	1228	598	146	283	184	227	269	507	1204	5	52	337	226	554	341	87	40	232	211	99	188	100	556	207	127	237	82	17	17	976	394	983
59	97	273	67	49	15	65	72	64	303	134	298	248	164	121	275	171	69	1228	650	166	259	205	201	243	554	1152	2	68	367	230	563	329	97	33	264	250	101	192	108	521	222	117	232	95	12	14	934	382	1004
62	92	265	74	57	24	62	84	69	303	137	306	310	170	122	245	172	70	1298	667	152	248	241	228	239	491	1128	3	66	371	237	621	317	83	35	258	263	112	233	85	581	223	125	239	91	15	19	1001	365	1003
48	102	236	93	112	32	68	87	63	313	147	277	251	168	127	243	174	60	1183	573	129	241	224	241	249	559	1073	5	51	373	240	505	330	82	24	259	210	119	233	106	538	217	119	224	83	19	20	879	371	931
57	111	288	83	115	30	75	91	78	255	124	304	240	137	120	258	154	51	1263	574	145	237	231	240	211	455	1143	5	53	361	217	615	329	65	35	205	198	142	215	103	559	241	113	176	90	18	16	976	345	924
66	108	267	88	74	31	77	95	66	300	126	332	240	158	122	241	171	72	1225	600	155	244	266	225	245	580	1074	10	47	399	270	574	325	71	37	263	223	145	237	99	570	228	137	218	90	23	22	985	329	940
71	111	265	64	77	26	73	92	81	286	119	313	244	147	131	240	147	65	1269	641	130	239	206	223	193	508	1032	3	58	366	233	563	359	77	28	259	233	130	231	97	611	234	111	240	103	12	21	986	303	911
77	116	261	83	108	19	76	90	59	274	137	276	200	134	120	251	170	69	1190	713	151	310	258	252	261	511	1032	2	69	403	247	550	312	68	30	274	274	132	212	107	584	261	121	265	95	11	7	942	313	832
77	110	239	78	106	34	74	100	57	267	117	295	225	167	131	254	149	61	1195	608	136	224	238	213	222	469	984	2	53	415	251	542	321	76	29	248	239	121	218	84	622	227	121	237	83	16	14	926	319	855
82	101	235	77	100	36	85	92	70	288	138	278	249	150	133	229	138	64	1183	607	145	245	221	234	251	575	1055	7	48	434	294	541	350	80	28	241	279	113	202	104	601	242	118	257	104	8	11	917	319	834
66	127	240	87	113	39	83	82	63	302	145	290	256	163	118	239	155	63	1126	587	162	236	240	242	262	535	953	3	57	423	293	545	351	77	30	245	259	121	233	120	598	229	128	255	94	9	13	850	396	893
85	138	261	62	103	45	108	119	86	276	131	283	228	138	131	229	129	54	1210	500	135	189	237	250	231	483	958	5	56	421	266	598	365	82	30	267	267	101	259	96	614	270	157	269	104	17	13	912	364	851
94	129	237	71	132	67	67	112	57	290	146	275	260	155	131	222	139	61	1162	638	165	262	248	247	242	542	954	2	37	441	298	639	326	85	27	276	251	114	194	106	538	249	118	276	108	7	14	959	307	850
86	142	237	72	116	33	82	80	68	301	134	289	204	123	116	223	126	54	1119	654	135	271	221	241	239	540	928	1	41	443	287	580	331	93	26	255	239	105	184	80	521	243	140	251	109	12	7	876	316	769
69	123	253	72	105	31	89	96	67	276	130	338	202	140	125	223	122	49	1168	523	164	227	227	254	239	532	972	3	36	396	292	597	381	88	31	268	234	106	193	59	564	209	127	275	121	9	8	935	367	796
77	109	249	74	81	36	82	83	76	276	129	315	238	132	142	230	132	47	1153	558	167	223	230	241	246	575	932	0	24	391	241	637	337	107	34	239	212	98	218	51	536	207	119	238	136	5	11	920	328	719
74	120	238	79	67	25	76	85	63	270	132	287	220	130	131	254	133	51	1075	481	132	196	230	225	233	570	963	1	35	376	254	615	354	78	35	246	173	105	198	63	524	210	113	255	109	7	12	876	332	645
65	105	256	82	45	15	75	83	87	240	101	303	248	151	140	233	131	48	1202	521	130	153	227	256	227	590	1044	2	28	386	248	692	374	91	30	252	198	116	192	62	547	239	113	266	103	12	4	974	318	520
76	122	243	64	25	9	91	105	63	221	88	271	207	157	127	202	127	52	1210	536	161	160	228	233	248	572	979	7	25	368	243	658	340	87	33	239	221	89	202	68	552	191	148	250	97	8	4	995	273	480
75	108	241	74	24	10	100	77	72	228	98	280	251	192	139	238	118	59	1169	433	155	196	204	214	230	503	993	1	36	341	259	638	363	103	25	251	221	90	195	60	569	231	109	280	94	5	11	952	348	693
63	122	225	75	26	6	82	95	65	249	93	300	235	153	142	226	123	45	1213	511	149	194	189	198	238	520	996	1	36	392	214	595	361	81	40	273	216	110	186	42	572	221	95	271	107	6	9	950	288	697
71	93	246	61	21	11	88	87	72	194	75	292	237	157	135	220	100	58	1265	473	148	173	197	202	218	476	989	2	29	346	249	635	336	73	48	260	213	115	213	44	568	229	120	250	99	19	13	979	279	646
65	85	215	66	20	9	94	101	70	225	111	316	279	153	144	244	141	31	1236	425	145	189	205	202	189	451	970	3	32	348	218	629	387	91	30	246	207	110	209	62	501	194	109	235	103	9	10	1001	293	581
56	70	210	72	16	14	107	96	65	216	103	310	263	161	135	249	106	48	1178	455	168	157	232	217	209	486	950	1	37	338	235	637	355	88	22	235	218	107	212	54	532	179	102	236	120	15	9	946	255	645
65	90	230	61	22	9	102	100	67	245	93	325	225	139	133	238	117	52	1220	445	146	178	236	191	212	517	988	2	48	330	233	662	333	80	32	262	195	116	217	46	496	208	112	275	117	11	6	1065	239	605
61	88	253	56	24	5	88	95	70	240	104	320	235	157	146	224	99	47	1346	407	121	198	224	217	216	527	968	2	43	327	249	687	331	79	31	249	187	117	212	52	543	213	88	290	131	13	12	1094	225	676
67	103	246	53	22	6	94	105	64	231	103	302	230	147	152	217	103	49	1193	472	122	211	219	247	234	510	883	5	30	332	230	591	358	74	30	263	207	117	204	49	537	213	113	263	150	8	13	1070	179	657
59	107	233	62	26	7	93	105	81	261	85	293	252	180	170	217	101	47	1276	419	132	178	207	206	220	496	964	5	21	312	209	619	378	87	26	244	210	95	200	34	524	187	102	252	131	8	11	1042	229	686
63	82	223	60	25	12	111	105	64	239	103	303	259	151	145	228	65	26	1227	452	157	176	244	208	205	536	909	5	31	318	231	678	318	85	35	225	236	103	232	40	537	209	100	219	116	12	10	1079	225	506
52	80	247	67	40	9	111	73	76	239	105	322	226	144	144	244	84	49	1276	447	160	196	235	204	216	507	1000	2	38	338	192	633	349	83	24	241	195	110	219	50	542	211	115	241	126	8	11	1036	240	581
70	86	239	64	32	10	97	92	85	241	109	314	268	168	169	213	98	41	1262	365	116	172	223	191	237	501	962	0	36	298	241	689	334	75	24	222	231	101	213	42	526	197	108	243	124	10	16	1023	258	582
59	79	247	51	46	19	113	99	88	226	92	308	240	133	164	225	112	46	1274	504	141	197	223	187	219	521	968	3	27	303	215	661	306	73	21	265	233	89	226	44	518	183	129	304	137	12	7	1026	234	628
58	90	210	58	51	14	133	118	81	198	91	264	232	141	180	239	104	46	1215	509	151	174	232	188	197	445	872	1	34	273	208	607	336	82	24	249	238	106	220	32	512	157	124	304	134	11	13	980	224	614
48	90	192	53	44	25	104	122	96	245	111	287	229	153	179	232	74	43	1192	359	102	130	226	177	224	503	925	0	28	287	238	578	338	77	19	211	234	104	207	47	504	199	126	300	115	13	6	963	243	621
70	82	216	68	77	19	86	105	85	249	126	312	235	169	176	248	84	33	1212	404	152	187	223	188	224	462	888	4	33	291	214	652	346	57	25	249	241	92	218	44	558	228	88	297	152	13	13	953	258	652
76	77	238	54	65	14	115	113	76	247	95	287	218	183	169	213	118	42	1223	420	149	163	226	224	244	477	913	2	21	298	216	680	343	50	21	244	241	120	218	56	595	236	106	258	148	9	12	1021	254	671
62	85	223	40	51	17	88	92	78	270	116	277	223	164	191	217	105	67	1186	423	157	200	231	207	231	508	920	0	30	277	231	668	332	71	29	223	220	103	224	34	595	238	109	235	122	8	17	1033	229	679
60	73	221	46	49	13	109	90	69	236	114	259	179	164	202	214	100	49	1279	363	113	160	205	223	204	459	902	2	36	280	200	702	373	54	15	249	197	101	213	44	640	246	114	261	124	14	6	1103	192	689
62	90	203	52	43	18	96	82	70	260	101	241	171	145	173	228	136	35	1173	406	157	211	260	187	238	575	773	1	32	310	239	638	343	60	15	236	229	112	211	42	564	179	107	246	132	11	9	1036	176	580
64	84	219	42	45	10	93	83	65	247	91	247	186	154	166	231	95	41	1274	383	146	204	246	209	246	481	869	0	35	274	260	697	303	73	19	271	267	106	229	37	601	209	94	305	154	9	7	1060	165	600
52	75	215	53	37	14	89	87	55	191	79	231	167	156	194	220	119	44	1350	396	117	165	261	215	204	471	876	0	29	257	187	715	349	56	19	238	232	116	227	32	632	212	98	286	126	9	18	1076	188	567
54	74	214	37	41	10	110	88	58	222	93	233	190	136	193	218	77	35	1363	376	153	178	243	177	231	496	896	1	28	276	220	749	308	50	29	264	201	111	213	47	577	202	104	306	147	6	8	1021	175	520
43	76	198	52	40	9	117	90	64	217	75	244	175	140	190	198	122	34	1386	406	103	158	205	195	241	456	825	2	23	269	194	720	343	58	18	265	199	105	216	22	549	220	109	358	131	7	11	991	178	578
72	88	195	26	38	20	100	73	68	248	82	243	152	148	189	184	96	45	1289	414	114	183	203	200	249	515	815	6	37	308	223	766	326	66	19	253	207	111	182	32	548	170	114	314	138	10	12	919	130	520
39	84	213	46	58	18	100	73	58	203	70	215	198	151	185	193	98	48	1290	426	134	193	228	220	215	484	770	2	32	254	179	710	342	47	28	249	238	109	219	26	499	171	105	272	144	17	14	977	164	510
42	72	207	41	49	11	107	68	63	207	84	266	194	134	195	207	105	32	1397	336	141	149	243	208	211	443	836	1	31	244	168	731	333	61	16	256	215	104	216	27	594	191	108	327	142	5	7	956	151	514
43	64	201	45	53	17	97	75	66	259	111	265	170	142	179	178	86	32	1355	317	113	134	249	193	248	491	833	7	28	238	216	764	339	48	16	233	198	125	216	43	569	200	113	297	135	11	9	983	176	502
38	69	196	37	46	12	88	67	58	237	70	253	202	123	189	192	89	37	1293	401	145	164	237	228	213	454	872	0	24	245	166	787	371	63	12	218	202	119	230	48	591	190	110	264	119	8	16	876	119	457
44	50	188	32	64	8	93	85	53	230	83	201	147	153	188	184	84	32	1295	366	147	152	242	202	221	435	808	2	22	237	181	803	330	51	12	237	218	110	225	43	545	208	97	315	130	7	12	940	114	493
56	70	185	29	56	9	85	80	61	240	81	199	155	134	189	165	95	44	1287	344	103	150	252	261	223	477	768	1	35	273	207	773	319	50	14	209	212	129	212	55	541	174	95	283	123	13	13	913	136	538
31	63	194	37	63	15	85	76	59	226	68	224	153	125	169	185	114	37	1288	297	112	131	253	252	233	455	821	2	25	256	208	686	334	47	17	232	191	139	254	53	579	219	92	351	99	15	16	956	179	527
33	73	184	29	67	4	97	79	58	250	71	201	141	108	198	170	102	35	1278	312	102	134	251	222	231	549	817	5	31	239	229	781	293	48	15	192	185	112	211	51	612	224	91	313	101	11	12	980	146	518
46	65	186	24	46	11	81	75	59	247	86	201	142	111	171	178	90	47	1298	384	98	156	251	228	214	468	754	1	32	265	190	728	308	52	16	201	170	113	227	48	604	238	95	304	115	17	12	1002	147	477
50	54	174	31	40	8	99	68	47	219	90	204	143	116	164	163	96	45	1236	343	95	137	241	212	197	421	773	0	31	266	138	713	282	39	18	188	220	112	182	50	588	199	85	294	109	7	22	949	141	501
40	54	160	26	41	10	83	71	61	272	84	206	148	128	177	167	83	32	1275	343	95	158	252	253	199	531	744	1	33	268	192	721	289	46	16	182	236	111	241	56	608	209	99	279	113	11	14	901	129	509
28	59	169	19	41	10	82	63	62	198	93	190	140	133	157	168	80	35	1267	441	126	208	224	226	161	419	702	3	23	221	168	749	283	43	18	221	208	121	193	44	663	220	105	313	110	11	14	880	118	514
50	68	143	21	61	5	87	69	64	247	96	202	126	131	149	159	84	35	1174	408	141	193	285	202	196	472	781	1	20	254	182	705	262	44	9	214	214	112	212	49	627	212	89	323	103	11	9	843	93	503
37	69	169	26	45	13	78	78	45	282	86	233	153	113	162	168	82	32	1261	339	111	141	254	183	173	519	762	5	29	281	210	700	290	38	12	223	195	108	222	43	643	207	112	332	97	17	12	889	108	463
34	55	173	24	36	7	94	70	69	266	88	245	157	131	164	148	77	34	1283	385	119	167	220	231	227	536	807	1	30	263	210	691	300	43	13	235	209	123	262	54	632	199	110	329	108	12	8	873	102	518
35	57	171	19	28	12	109	68	72	245	72	230	152	126	159	180	88	35	1288	391	128	171	245	225	198	443	801	2	28	243	176	696	291	45	12	203	215	115	253	62	589	196	118	287	93	16	19	908	108	414
35	53	150	20	38	7	97	88	58	238	64	199	170	114	151	175	76	32	1278	328	94	139	237	209	184	472	798	2	25	229	179	725	302	55	17	207	187	111	265	69	621	203	104	311	81	15	13	869	118	500
46	47	159	24	27	10	94	82	64	219	69	226	148	116	157	156	56	29	1287	372	118	173	246	210	192	403	778	1	22	216	162	666	287	44	10	197	167	112	246	55	592	207	100	329	78	15	21	791	112	442
47	55	159	18	25	9	103	63	50	208	77	231	191	124	155	155	51	23	1307	324	111	147	267	224	188	392	818	4	15	214	152	668	309	40	11	201	154	109	231	59	665	206	96	307	66	18	17	809	93	491
47	72	165	22	33	7	90	52	41	235	98	222	167	107	142	151	62	25	1261	330	109	154	258	212	215	444	723	0	31	236	190	689	293	39	14	179	159	114	256	73	666	198	89	295	77	15	9	905	115	441
43	61	155	19	37	4	83	61	46	215	96	239	196	117	152	137	69	19	1220	341	87	147	263	229	173	451	687	1	37	218	167	719	304	35	17	198	147	117	229	47	703	245	104	304	76	19	27	799	94	515
40	64	158	17	16	3	97	75	58	214	102	249	183	100	129	149	54	19	1243	323	97	143	266	237	163	435	724	1	32	224	154	666	281	39	9	188	134	141	249	38	682	214	108	249	79	20	10	838	130	449
37	74	116	13	14	5	94	77	57	226	81	256	183	106	152	161	47	12	1280	339	119	154	244	224	212	460	781	1	26	205	188	629	220	39	6	194	133	92	170	49	696	212	98	303	58	21	18	793	86	485
41	56	143	20	15	2	98	61	49	203	63	253	140	106	152	180	53	15	1266	321	106	146	246	239	168	431	734	2	39	199	156	604	273	36	8	207	146	111	235	47	706	240	93	338	51	18	22	866	94	470
44	55	146	20	29	6	95	72	53	212	64	250	164	101	162	185	46	17	1221	281	94	130	232	214	186	471	735	0	43	201	191	623	273	31	10	195	153	106	235	64	696	221	116	320	71	16	25	857	71	528
46	51	136	25	22	5	92	72	46	252	82	228	169	109	145	186	52	14	1229	303	112	160	228	274	183	483	719	2	49	232	182	596	260	31	8	199	215	133	266	42	717	234	107	321	55	21	21	836	92	517
45	69	150	20	27	6	87	67	40	260	88	231	172	103	154	176	36	13	1198	337	129	151	247	233	173	521	769	0	35	237	185	557	252	54	15	193	173	147	242	40	688	228	81	334	57	24	19	898	103	493
39	56	133	24	25	5	91	71	53	244	87	262	208	87	149	160	49	8	1144	337	132	179	246	247	186	511	723	2	43	216	186	571	256	39	11	174	159	141	243	46	706	253	97	284	54	22	28	849	106	451
33	47	133	20	26	7	89	70	52	242	76	257	184	91	155	166	44	12	1202	311	134	157	263	193	163	449	691	1	37	192	167	585	255	42	8	190	160	111	237	36	693	217	106	292	69	27	17	896	87	502
29	40	145	17	20	3	93	71	38	229	80	242	159	87	145	137	50	11	1104	276	112	138	243	231	147	457	674	2	39	178	147	548	234	37	12	174	172	131	260	32	657	238	77	295	51	29	18	823	113	513
42	46	133	17	16	6	87	63	47	231	92	221	166	85	124	168	49	14	1080	298	90	136	220	215	180	421	603	2	29	208	138	559	199	29	12	176	150	123	257	50	607	226	79	280	59	22	22	851	124	489
40	65	138	19	18	9	88	57	46	258	76	309	176	87	134	153	28	14	1115	296	115	167	256	206	165	495	733	1	41	213	156	549	197	41	16	198	135	129	222	37	616	170	88	304	65	26	15	791	104	482
37	69	156	22	21	3	93	70	49	239	92	270	187	66	133	160	29	14	1163	325	120	152	241	205	171	523	716	2	30	202	164	528	230	31	12	187	142	109	220	34	628	171	95	261	65	17	27	769	91	448
35	79	186	33	25	9	102	63	64	244	74	262	196	78	134	151	36	11	1188	317	115	151	242	197	174	510	732	0	38	207	145	540	194	43	11	177	143	110	225	37	619	185	74	276	40	9	30	761	67	464
45	65	147	20	32	4	99	58	45	248	77	198	180	72	131	139	44	11	1138	352	86	150	260	221	181	524	599	5	28	211	154	531	204	43	17	181	153	86	167	53	603	191	86	277	25	23	11	824	110	431
28	61	133	30	31	3	104	69	62	179	68	238	165	79	145	147	43	14	1128	318	81	154	231	211	148	320	644	1	29	148	105	467	209	41	18	169	187	102	191	40	593	204	97	280	47	25	18	921	107	466
46	61	165	22	29	9	85	61	61	213	63	254	176	84	145	155	44	12	1136	359	132	230	233	194	134	423	685	1	25	187	127	506	210	35	16	164	153	97	216	48	631	187	83	249	30	18	19	864	121	489
41	47	155	21	25	8	94	68	47	216	59	283	171	86	147	131	48	13	1112	240	77	128	235	230	118	431	744	0	20	204	104	462	203	43	16	158	161	107	205	44	621	187	87	257	24	31	17	856	65	488
30	51	166	25	35	7	100	59	46	204	57	272	158	67	162	142	43	13	1131	312	99	125	236	201	149	403	727	0	22	168	141	477	194	36	20	137	195	103	207	56	690	187	89	245	24	19	15	821	75	490
33	77	144	18	33	9	98	70	60	229	59	226	147	82	141	140	36	10	1062	286	65	111	226	219	163	498	669	1	23	197	140	409	174	35	5	152	160	103	181	61	644	192	98	218	31	20	24	768	101	468
41	55	141	18	40	5	98	68	47	209	74	223	143	64	142	152	40	9	1077	307	96	133	247	209	135	458	712	0	22	180	120	465	172	28	13	165	158	107	222	56	694	202	105	234	30	22	23	778	105	465
46	55	125	20	35	14	91	73	55	263	69	209	140	77	135	159	35	12	1093	331	108	147	240	197	157	546	689	0	23	193	138	435	190	41	9	167	161	128	232	68	661	215	103	266	35	25	9	791	106	491
25	41	139	17	47	8	105	54	60	203	56	188	134	89	134	147	30	7	1069	300	95	130	234	192	136	395	686	0	26	141	89	423	198	28	11	157	164	126	200	61	608	213	97	252	33	24	15	763	117	424
35	35	116	18	28	6	87	58	40	178	55	199	125	74	143	123	33	10	1203	316	87	151	236	195	130	356	698	1	26	131	88	428	171	29	13	163	169	110	226	51	627	182	90	245	23	21	20	828	116	508
38	44	119	25	35	7	88	49	36	204	44	185	137	74	155	121	38	19	1175	314	110	150	236	222	110	427	722	1	34	154	98	463	175	32	12	168	159	143	233	58	608	185	88	234	33	21	22	785	98	503
42	60	137	18	28	6	84	41	56	185	59	216	151	70	144	138	40	14	1217	360	111	153	238	229	160	402	681	0	15	169	111	433	193	32	8	160	155	123	227	71	635	216	79	245	28	14	13	729	103	443
37	77	121	10	29	4	87	51	35	185	51	201	154	71	155	117	35	13	1175	327	106	150	253	193	166	505	743	1	20	195	136	406	182	26	10	158	171	113	207	49	637	214	89	236	33	17	18	759	96	464
30	70	144	18	36	10	105	42	41	163	53	178	139	59	144	116	45	16	1216	313	103	125	226	209	157	437	732	1	26	166	138	450	217	26	9	166	160	123	203	53	682	234	101	225	22	22	18	806	90	422
28	48	119	20	28	10	90	53	43	168	50	202	127	75	138	142	51	15	1183	263	72	113	209	203	136	383	650	2	15	167	101	420	162	33	6	177	145	123	211	52	680	211	85	256	25	17	15	791	93	462
34	64	131	15	26	13	93	46	38	160	68	216	162	68	153	128	41	9	1213	380	138	181	219	185	172	439	724	1	20	187	148	409	191	23	9	168	182	162	227	73	669	260	86	241	27	20	24	831	105	472
40	68	131	23	26	9	89	47	35	143	52	204	166	56	141	132	37	10	1087	287	123	155	247	218	154	435	777	2	13	191	140	408	151	26	6	195	173	139	220	75	672	221	83	226	27	13	22	775	97	405
40	65	145	12	33	18	89	46	38	183	50	173	147	60	141	105	29	17	1091	341	115	166	200	191	182	499	736	0	23	244	168	427	159	28	7	180	161	134	184	88	652	212	69	205	21	18	13	834	82	443
28	61	113	21	34	13	89	35	41	175	43	187	146	64	122	105	48	18	1143	333	85	153	191	160	162	431	712	2	24	216	142	414	149	21	6	189	173	139	169	79	656	218	80	221	23	26	20	910	114	429
36	58	119	15	35	11	84	42	35	147	45	209	170	60	154	96	39	13	1163	265	83	160	223	185	156	424	852	1	21	222	161	402	145	21	10	167	162	111	204	76	673	209	64	209	34	28	26	757	108	439
37	56	128	24	30	11	84	58	45	200	72	201	166	57	126	97	48	14	1172	321	104	174	227	221	143	452	702	0	14	227	148	409	182	27	9	178	169	113	206	73	670	207	90	248	24	18	24	795	116	438
28	37	106	19	42	20	92	56	37	161	58	202	152	57	128	106	42	12	1127	326	89	135	227	189	144	351	643	0	17	176	138	425	153	18	5	167	178	99	230	68	611	211	81	223	28	25	11	800	91	362
31	66	144	11	44	14	84	57	41	197	76	214	195	53	143	104	41	22	1196	291	80	152	204	191	199	521	705	0	18	229	185	444	168	34	14	161	153	129	214	103	648	216	74	200	15	23	26	764	103	474
37	63	102	15	35	23	67	64	50	201	58	210	168	69	135	114	47	23	1120	300	111	141	216	204	161	501	658	2	18	216	194	400	138	32	3	152	157	95	205	68	603	214	63	229	14	28	31	807	96	413
38	61	116	14	37	20	89	55	41	209	63	186	129	48	161	100	53	22	1136	362	146	181	233	173	172	473	699	0	12	219	168	424	159	34	3	177	190	103	175	83	587	216	88	216	24	23	36	811	126	423
33	54	99	14	51	15	77	54	48	176	43	187	161	63	150	109	45	16	1249	316	136	165	192	193	152	415	718	2	20	156	176	433	131	33	13	148	194	91	195	60	644	260	64	212	33	22	26	847	82	411
41	42	97	7	37	18	68	63	37	164	63	199	153	65	161	104	47	22	1113	340	101	163	197	187	139	438	722	1	17	188	169	408	151	31	7	167	152	117	201	64	633	242	84	202	28	18	28	724	109	486
29	52	88	9	37	13	74	53	43	148	34	186	147	53	155	96	54	12	1137	341	139	174	230	199	128	429	671	3	12	195	148	400	156	39	6	174	182	103	225	55	659	226	68	235	25	25	33	798	90	417
45	43	97	12	46	12	80	57	48	204	73	198	154	59	164	108	47	13	1054	259	117	144	200	210	166	473	628	0	17	196	161	411	188	20	4	189	119	115	212	65	651	216	79	217	29	26	33	835	88	448
38	55	105	15	30	10	80	49	34	190	67	231	192	67	156	91	49	15	1153	322	83	149	213	198	174	423	711	2	20	196	158	407	160	32	9	156	162	149	242	60	600	192	82	207	28	21	19	781	85	432
19	40	89	11	38	8	73	67	52	165	58	255	151	57	145	104	55	17	1032	340	81	137	208	190	168	400	699	1	9	175	152	445	161	22	4	146	184	112	210	48	605	203	73	210	24	31	25	813	96	399
31	38	110	7	25	7	82	62	41	137	47	226	162	65	153	99	51	19	1011	292	87	136	220	182	123	306	665	1	12	149	101	412	168	34	6	155	164	128	247	48	631	222	81	214	23	28	27	810	121	475
38	44	107	13	28	10	77	49	36	167	64	219	166	58	136	129	43	21	1084	333	88	165	199	178	154	415	669	1	24	181	130	425	169	27	6	161	179	123	184	61	686	252	75	209	17	26	31	918	97	419
24	57	85	20	26	7	61	72	43	163	59	226	178	51	129	89	47	20	996	281	77	145	217	190	139	428	650	2	11	171	122	445	151	26	12	154	148	113	179	41	680	238	76	204	21	25	28	876	117	472
37	40	87	18	15	9	71	63	47	169	52	221	165	59	125	123	52	17	969	321	83	180	214	172	137	375	616	1	12	147	130	391	140	38	5	173	152	106	203	21	632	215	67	211	13	23	36	857	131	388
36	42	111	13	28	6	74	68	39	174	58	204	171	56	134	134	44	8	1036	292	90	160	202	198	162	377	651	1	14	152	164	365	173	36	8	158	176	112	161	16	625	247	75	228	21	21	23	910	134	427
27	45	98	13	24	3	61	70	42	135	44	255	182	67	135	135	37	21	1089	304	70	141	230	183	151	399	658	2	5	157	127	403	157	25	4	166	134	97	191	20	589	258	83	209	20	24	27	942	124	413
14	27	89	20	16	4	78	66	43	118	35	222	177	61	144	142	38	14	1085	364	85	161	213	200	120	308	601	1	15	115	102	399	143	29	3	173	127	84	199	14	603	182	71	232	24	27	24	878	142	434
22	43	75	15	23	11	59	71	39	152	35	193	174	63	133	152	36	16	1028	288	115	183	239	197	179	437	563	1	9	181	153	370	138	30	10	163	144	93	186	25	546	220	69	187	22	22	22	886	126	394
31	33	112	15	13	6	63	68	43	140	40	234	206	51	154	125	51	22	1075	337	84	182	226	189	145	386	683	0	18	142	153	324	140	24	7	166	158	94	232	19	627	192	73	214	18	24	29	844	123	461
24	39	116	18	17	7	63	68	49	125	36	257	205	53	144	142	39	20	1118	298	101	169	236	153	142	351	695	3	11	148	132	339	141	26	5	181	138	91	194	16	606	223	73	229	28	34	26	851	122	403
31	40	96	13	12	3	56	76	38	130	40	195	201	72	133	153	29	16	1037	265	51	143	212	161	175	407	629	1	9	172	131	352	138	20	7	172	150	90	185	22	594	225	70	226	29	31	23	866	121	476
17	44	105	17	12	8	60	61	29	136	21	268	200	41	127	155	38	17	1114	370	82	166	224	184	156	480	777	1	16	182	159	357	157	19	8	168	136	80	171	17	641	248	78	192	22	31	29	887	106	416
22	47	85	15	17	8	67	69	53	112	35	187	193	62	143	159	35	15	1016	299	86	150	204	191	127	329	619	0	17	132	150	406	143	18	4	158	155	85	160	23	630	237	94	188	31	24	32	922	144	437
38	39	76	19	16	6	73	55	40	114	33	189	184	56	138	170	41	8	989	317	93	125	208	178	160	328	594	2	16	169	143	387	150	22	3	166	151	79	159	13	626	251	89	218	25	25	22	893	171	404
31	53	73	23	24	8	71	66	32	140	42	217	161	85	158	158	29	15	931	339	103	209	218	182	201	390	524	0	14	161	156	375	138	16	6	178	121	66	169	15	582	251	83	205	16	16	18	939	161	379
31	49	80	20	13	9	71	59	42	130	34	229	190	71	127	153	31	12	991	347	95	209	223	186	139	354	655	1	7	152	140	342	129	15	5	179	141	97	159	24	586	240	79	217	18	22	16	965	146	421
31	41	80	15	17	5	70	51	37	130	36	186	183	64	131	134	30	13	1000	309	76	148	229	167	152	391	628	1	14	152	159	357	142	25	7	163	138	105	171	23	576	220	65	183	30	16	22	939	151	346
26	39	89	19	24	7	78	46	36	148	37	218	183	44	144	139	39	18	989	297	103	156	206	167	178	381	623	1	14	154	134	347	146	23	7	158	110	87	170	12	537	237	85	231	17	17	16	922	148	441
27	37	82	13	18	6	53	68	50	124	24	233	204	55	130	131	35	14	1076	197	38	91	221	192	154	406	698	0	19	165	146	367	126	13	4	160	100	97	152	14	615	222	81	174	23	13	20	936	130	448
29	37	82	15	34	6	69	48	40	112	36	250	213	53	148	134	36	15	1067	240	71	145	219	176	143	383	665	0	7	141	143	345	129	25	9	183	116	93	124	28	612	245	65	211	16	20	22	887	120	430
21	19	85	13	25	17	71	60	37	80	25	234	211	48	125	121	27	12	1038	303	77	158	193	192	114	297	605	0	6	122	109	346	141	39	9	189	106	75	131	31	590	223	68	198	14	24	26	908	137	373
19	37	78	14	27	9	70	52	48	106	27	216	184	61	138	128	37	15	942	272	95	131	210	183	146	364	514	0	13	156	137	331	143	12	5	177	136	79	133	44	606	216	65	215	18	23	17	861	144	416
26	58	102	18	17	5	55	61	34	147	37	187	172	58	135	120	36	17	932	305	72	156	209	186	136	356	549	2	8	159	157	332	155	23	6	166	132	69	122	52	556	235	81	219	17	19	23	922	145	442
29	47	109	13	23	3	65	49	27	153	20	210	215	58	118	128	41	13	932	368	108	171	182	182	161	379	633	1	8	182	123	321	125	29	4	161	154	77	115	43	590	241	70	187	24	17	14	842	113	415
35	27	94	14	17	3	64	69	46	134	32	205	195	47	117	140	42	15	909	400	81	170	212	171	132	376	663	0	14	158	131	348	110	24	5	163	146	65	131	30	620	235	83	193	18	26	17	819	128	438
36	43	66	23	25	7	62	61	33	114	29	179	184	59	109	138	36	16	833	411	107	186	182	178	132	379	647	2	18	161	124	339	124	27	9	185	135	81	102	21	585	219	70	211	17	30	28	772	91	404
32	49	106	18	25	3	71	54	39	122	18	222	192	61	124	160	23	12	1002	352	85	177	211	172	163	453	922	0	13	216	133	379	147	21	8	167	148	59	93	24	676	252	79	200	17	20	25	770	72	434
23	49	79	3	19	4	66	65	25	104	23	186	190	61	126	150	30	11	888	322	96	163	209	168	121	353	646	1	13	185	136	342	167	22	10	180	163	65	113	18	545	237	76	217	16	25	19	838	130	457
28	47	88	14	19	4	77	51	42	109	23	192	185	55	126	136	31	8	836	331	112	187	196	170	144	340	591	2	16	160	121	351	141	26	5	152	138	69	109	30	565	204	82	213	18	27	29	885	141	486
36	42	82	14	24	8	59	62	28	99	30	204	223	80	140	144	35	16	909	366	113	183	171	143	118	326	691	2	11	167	115	361	133	35	13	156	134	68	108	21	576	208	66	172	16	33	19	895	129	423
25	34	82	13	27	5	68	60	57	84	19	190	197	81	124	151	25	13	868	373	111	163	189	142	94	322	695	3	9	151	94	380	134	26	7	165	121	50	85	20	529	207	72	199	21	27	31	914	138	423
32	39	106	25	10	5	63	70	33	99	16	206	207	71	109	140	27	22	810	375	122	180	183	147	136	407	636	0	10	170	112	348	158	28	5	172	155	52	105	24	530	204	83	217	12	39	30	912	122	457
34	40	104	17	18	7	64	51	28	100	17	203	193	73	129	144	36	9	787	301	93	153	181	174	116	338	620	0	8	136	117	367	114	25	7	176	152	56	106	14	501	199	80	198	16	39	28	854	102	417
26	54	89	18	14	2	67	64	41	97	21	205	178	71	124	137	30	14	769	329	72	126	181	158	141	407	559	2	8	170	134	335	127	27	10	164	140	54	113	17	520	212	76	226	10	39	33	881	135	460
34	55	93	17	16	4	60	66	32	81	18	186	171	66	108	125	23	23	751	326	72	170	177	165	152	393	588	1	8	190	127	368	136	24	7	160	135	53	137	14	510	214	77	204	19	41	41	885	124	465
27	37	81	12	9	1	62	61	32	74	10	192	191	74	116	122	37	20	784	275	79	140	174	169	139	298	628	0	5	112	97	299	132	25	10	166	152	56	108	14	537	183	52	234	16	39	42	888	123	437
25	51	110	14	14	3	59	61	38	106	21	196	212	67	127	128	24	10	834	428	113	162	192	168	120	358	681	1	1	158	122	330	147	21	3	161	142	56	100	15	529	203	95	219	11	35	49	805	102	464
21	38	114	17	31	2	57	48	32	61	16	240	184	61	121	144	28	12	874	366	99	182	197	165	107	289	720	1	5	121	92	370	121	22	7	169	133	45	98	7	550	217	67	213	14	37	43	797	87	459
29	41	120	16	18	4	66	58	32	66	21	212	174	62	107	163	36	10	784	393	100	161	193	137	97	304	558	3	6	131	100	323	142	29	8	184	112	44	105	11	532	211	74	187	17	50	34	907	94	453
28	43	111	19	17	4	62	53	31	61	22	210	202	67	109	165	23	10	794	345	83	158	167	166	112	307	523	0	3	129	104	342	165	19	6	170	126	66	120	11	513	208	81	213	23	42	45	868	111	426
26	42	98	17	24	7	60	56	27	78	10	200	217	72	109	150	25	15	753	303	92	170	167	167	115	358	509	1	14	138	114	366	136	23	8	137	163	73	165	11	532	207	74	179	15	32	57	889	149	400
26	34	113	20	20	3	51	67	30	76	11	233	170	64	116	151	25	6	810	283	122	128	175	152	92	265	549	0	8	116	74	362	143	27	8	144	169	58	143	6	558	239	75	224	23	47	45	841	145	409
32	35	115	29	22	4	68	46	30	77	18	225	184	87	125	143	12	6	776	261	79	99	191	139	118	328	575	1	5	142	114	328	157	19	7	159	134	44	105	14	580	196	61	187	22	50	40	884	131	418
32	30	95	15	21	4	66	39	25	76	31	232	185	54	120	145	15	7	758	230	79	121	169	126	89	309	614	0	13	113	106	326	143	22	7	163	129	73	128	8	624	216	72	209	22	45	36	927	125	436
29	32	95	15	18	4	74	42	38	69	15	215	229	53	101	149	23	8	830	192	68	85	197	136	151	373	582	0	13	133	108	299	119	23	14	146	140	85	134	13	596	221	79	209	21	58	34	849	90	435
14	32	102	23	19	5	68	48	21	71	17	212	181	78	123	187	17	7	793	268	96	135	176	143	105	308	545	0	15	129	89	321	124	25	9	165	135	75	149	9	568	224	65	233	21	34	44	918	134	445
35	38	106	22	20	3	56	50	24	59	7	245	197	73	128	158	21	15	828	323	83	183	164	159	111	296	705	3	11	127	103	342	167	32	9	154	142	68	138	13	611	235	78	238	18	41	37	843	142	431
30	45	118	28	13	5	57	48	29	54	5	242	193	60	82	140	36	7	841	331	98	163	178	166	126	373	707	0	13	120	120	359	152	30	13	170	157	69	125	10	632	233	59	235	20	40	35	787	81	435
36	47	133	18	20	3	65	52	33	54	16	209	144	53	111	155	18	8	856	313	97	153	186	152	121	295	701	1	10	142	99	307	152	31	11	169	123	79	128	10	618	229	67	208	19	38	32	880	87	440
35	61	144	28	12	2	72	39	21	69	15	212	190	53	114	147	25	7	924	430	107	197	177	148	142	355	741	0	10	136	112	316	146	30	8	163	120	82	157	17	624	232	72	185	14	57	36	876	87	446
40	57	108	21	13	4	78	44	25	85	11	228	206	58	124	126	14	2	928	393	93	141	183	163	110	337	643	0	6	144	112	319	141	18	9	183	134	77	135	12	589	225	74	213	22	58	29	831	84	385
30	44	121	21	15	1	84	41	26	53	8	216	186	67	111	152	13	4	875	334	79	160	177	151	129	326	537	0	16	125	105	319	122	12	4	168	135	65	104	13	603	227	66	208	24	39	36	916	153	411
26	42	103	18	20	5	82	51	38	63	15	223	181	83	117	133	20	8	849	369	98	155	178	141	126	310	695	0	10	126	106	283	125	26	11	156	153	53	123	20	559	202	70	211	21	37	28	858	138	432
26	35	98	17	14	2	85	34	25	49	18	255	173	53	97	131	18	4	814	325	85	122	196	141	117	274	610	0	10	128	92	299	130	23	12	171	124	55	122	23	543	200	99	189	29	40	44	845	115	434
33	49	107	12	15	4	78	31	31	87	13	215	167	60	93	174	15	5	828	361	91	158	201	175	108	299	644	1	11	128	93	309	130	26	4	146	136	57	138	23	549	201	68	198	21	39	31	816	99	446
33	52	118	17	24	8	68	40	32	84	21	247	188	82	124	148	8	7	900	329	79	172	207	160	127	376	695	0	7	149	109	323	144	20	7	149	137	55	106	35	632	219	73	220	20	33	38	794	107	424
36	54	113	20	24	9	71	45	35	112	18	230	166	69	124	168	21	4	847	334	100	149	186	142	120	326	573	0	16	130	91	343	148	32	5	150	135	79	113	22	575	209	77	218	32	19	39	808	125	435
34	45	111	22	16	6	64	41	21	77	26	208	175	57	103	166	11	6	840	364	101	189	169	163	143	264	539	1	10	114	77	321	125	39	12	174	130	55	119	10	545	199	66	234	20	38	33	858	165	415
31	46	119	12	13	1	68	41	22	83	19	222	189	71	84	148	15	7	789	421	94	214	164	150	126	316	557	1	11	133	82	294	126	36	14	155	126	80	127	14	517	187	70	194	27	44	30	863	134	377
35	42	125	20	15	4	63	46	31	94	12	236	193	69	91	147	20	6	843	299	84	139	162	137	138	302	574	1	8	117	63	295	153	34	11	153	112	77	134	15	548	224	77	230	17	37	35	842	129	463
31	42	121	17	21	6	68	53	28	81	19	243	170	62	105	158	14	11	796	325	73	162	153	127	112	299	520	0	4	127	80	324	117	44	14	157	118	42	107	10	576	196	61	240	13	32	20	785	98	438
47	63	136	25	17	4	78	40	37	89	21	242	180	56	122	156	14	7	800	277	59	122	147	130	157	360	622	0	1	152	112	328	146	47	16	139	116	58	128	10	593	186	71	203	19	28	43	839	96	445
30	58	124	20	13	3	67	41	31	111	27	211	197	66	98	145	17	4	796	256	65	89	146	117	126	318	528	3	10	116	90	300	138	36	14	141	134	47	137	5	503	186	80	237	25	30	34	794	122	486
38	52	104	26	9	4	79	44	29	61	14	216	175	74	92	144	18	5	743	276	70	126	151	111	84	327	501	0	2	116	89	315	145	26	10	160	136	56	98	6	479	185	89	233	23	35	25	802	133	462
36	55	114	18	12	0	64	40	34	68	20	210	178	73	114	148	12	7	788	259	74	144	153	106	129	264	496	1	5	129	88	321	151	35	8	161	159	45	76	8	492	181	66	222	25	21	20	826	122	437
44	50	119	23	13	6	68	41	27	59	18	208	190	86	114	175	18	5	755	297	75	147	133	113	94	305	485	0	4	118	85	343	126	31	5	171	151	50	120	5	517	197	87	210	17	27	19	896	139	440
38	64	144	29	13	3	50	38	27	61	9	267	183	78	111	127	18	7	813	238	59	132	152	125	162	357	710	1	2	129	94	349	155	33	15	164	129	47	84	6	613	203	61	249	18	21	26	816	92	469
30	57	127	24	6	1	51	35	28	58	14	245	184	50	98	119	17	8	712	300	74	118	154	110	105	300	557	0	12	114	73	346	166	33	19	182	147	42	122	14	556	194	73	236	24	25	35	747	82	461
36	59	124	23	7	0	62	50	29	54	8	281	152	70	107	145	13	8	670	348	90	150	139	120	136	284	586	0	10	118	50	344	168	39	15	206	140	56	93	13	605	192	71	276	18	21	22	799	117	429
32	48	162	31	8	0	50	43	24	69	13	243	179	77	115	166	19	8	699	390	85	178	133	107	112	274	595	1	9	91	85	323	165	26	10	185	136	61	97	7	557	176	69	242	28	24	21	858	130	473
32	51	147	29	7	4	54	47	22	62	17	211	167	83	134	166	20	4	727	311	71	137	144	110	90	305	560	2	7	100	60	310	126	34	11	185	142	54	93	14	475	180	77	246	33	30	22	834	104	433
47	47	139	21	5	1	60	37	24	76	11	231	169	77	116	132	14	3	754	353	105	160	129	113	106	294	533	2	10	127	65	313	112	35	9	162	173	35	80	9	483	177	66	228	26	15	21	844	115	466
31	46	190	27	4	3	59	48	22	50	14	216	181	68	107	155	13	5	834	393	94	162	143	107	90	210	619	1	7	104	71	307	128	33	10	173	143	44	80	12	509	170	81	225	28	28	20	781	105	422
28	56	173	23	15	0	78	48	26	63	18	220	153	63	91	158	18	6	820	562	125	216	142	116	104	232	556	1	6	112	90	285	121	34	8	196	166	42	99	10	469	161	85	273	29	25	25	828	86	432
41	61	152	29	9	1	56	47	19	67	19	218	171	76	90	150	17	7	879	492	99	199	147	98	138	265	588	1	7	131	95	282	113	37	11	188	169	49	98	10	478	165	72	234	30	27	30	824	98	433
42	51	161	25	9	2	58	59	36	67	11	244	161	59	93	151	19	8	891	372	89	161	153	104	117	303	614	0	8	125	90	292	140	29	18	175	156	53	105	11	486	171	85	253	30	23	23	754	99	403
42	60	182	32	10	2	71	52	24	68	10	249	166	63	90	139	21	11	949	401	87	144	136	118	116	272	717	0	4	128	93	275	123	49	9	161	156	32	82	0	465	160	82	244	24	28	32	815	115	392
61	67	173	21	12	2	65	44	34	81	25	251	163	71	99	102	15	7	912	529	123	215	163	105	133	359	640	1	7	154	84	336	135	27	4	172	172	38	85	2	514	158	64	270	32	26	23	714	78	411
53	63	168	25	7	3	75	49	28	79	17	244	170	75	109	101	13	4	930	412	97	174	145	105	131	323	658	1	6	135	92	292	117	22	13	166	159	37	82	8	514	198	98	255	31	27	26	762	102	411
39	63	187	34	7	3	60	58	30	47	11	229	138	68	104	112	13	5	849	414	86	152	157	106	166	388	639	4	10	175	111	261	122	19	11	173	153	42	82	6	513	192	82	241	34	28	31	818	120	434
33	31	150	26	7	2	63	58	18	31	10	251	159	50	98	116	19	6	809	431	110	174	130	106	100	208	654	1	12	87	80	306	106	11	4	183	155	39	94	1	517	206	70	250	35	27	28	837	122	400
45	55	164	27	7	3	55	51	22	68	17	260	146	41	101	78	12	5	806	512	118	229	137	118	112	326	631	1	7	155	73	277	121	33	4	176	144	37	87	0	490	202	93	266	29	31	29	831	122	417
37	52	145	26	8	3	64	52	34	39	8	208	155	58	123	89	7	4	857	420	113	194	147	122	137	287	648	1	7	141	92	281	120	23	6	173	151	32	80	3	468	188	95	242	41	27	20	823	126	415
36	64	150	19	4	1	56	49	15	35	7	252	137	46	119	77	23	4	871	348	101	158	119	110	110	272	585	2	11	149	87	296	107	32	11	151	152	33	90	3	504	190	88	243	39	22	30	843	119	446
34	43	137	26	10	3	62	50	26	42	4	247	137	57	132	110	14	6	875	433	119	172	140	109	99	269	622	0	10	122	95	295	93	33	5	150	156	40	79	5	463	160	82	239	30	18	15	817	97	436
39	43	163	38	8	2	80	50	25	34	5	233	169	49	108	71	21	7	869	401	75	150	136	112	110	256	600	0	6	129	74	332	113	44	14	150	175	47	78	3	524	180	83	240	35	24	27	841	104	392
39	57	163	25	9	3	59	72	26	37	8	255	146	56	130	74	30	4	912	471	116	159	146	103	127	335	623	2	7	126	115	304	124	47	7	153	171	38	105	2	496	198	77	276	36	30	23	839	122	447
23	33	164	20	3	1	59	39	16	47	10	230	142	52	92	83	13	12	883	489	87	120	147	99	111	225	619	0	7	114	89	315	139	42	7	152	161	34	79	1	478	192	80	244	40	29	29	745	94	429
26	36	172	26	6	1	71	51	16	50	9	255	141	57	116	116	24	3	924	528	101	195	143	111	114	208	625	0	4	90	62	295	131	37	4	156	161	32	87	1	470	174	79	251	29	23	21	771	103	406
29	53	187	25	10	2	72	38	26	83	20	244	166	69	114	92	12	2	948	428	101	158	140	106	121	269	625	0	7	118	88	306	124	27	8	147	146	39	89	0	465	180	83	230	32	30	27	753	101	403
28	37	173	27	6	1	67	40	27	49	13	252	143	49	119	90	16	8	1038	448	93	143	129	105	114	206	646	1	2	100	86	279	133	29	8	166	175	32	89	1	480	189	74	283	35	34	35	770	122	410
31	45	175	29	2	3	67	45	26	73	13	262	136	54	113	78	14	6	983	494	116	193	117	108	137	264	646	1	11	118	62	311	153	29	6	163	163	40	82	2	552	190	108	274	36	26	35	777	108	378
27	39	181	20	4	2	49	51	24	89	34	259	149	55	138	76	17	9	943	439	87	155	144	106	122	278	645	2	6	120	88	292	109	23	8	157	164	32	94	1	544	180	95	250	40	36	42	750	81	404
27	35	165	28	6	0	45	47	24	63	20	294	136	65	147	82	18	10	922	536	120	231	160	114	103	272	629	1	5	105	82	283	134	29	4	137	142	47	104	1	515	214	74	228	46	29	31	801	109	407
22	24	173	18	2	0	47	47	23	77	20	259	149	49	129	79	23	6	933	521	142	201	145	112	127	247	668	2	12	103	95	282	109	38	10	149	167	45	115	0	527	192	74	265	44	30	27	694	93	430
25	42	184	27	6	1	64	40	17	57	17	240	168	54	101	80	21	10	999	485	110	179	133	102	91	228	745	3	4	121	79	246	99	26	9	141	188	50	107	3	555	239	100	257	42	18	35	713	68	368
29	41	187	29	4	2	59	43	18	66	11	245	126	46	124	73	32	10	957	475	124	171	139	109	139	299	657	0	7	129	85	274	107	23	7	143	193	45	106	6	584	204	101	244	37	34	27	722	84	405
36	43	170	34	0	3	58	55	24	80	22	214	145	54	116	98	17	5	932	507	135	179	120	99	126	278	598	0	10	130	97	290	110	30	5	146	183	47	87	3	527	217	98	252	22	21	20	755	106	447
30	53	164	23	4	0	56	45	26	86	8	250	121	42	95	72	21	4	911	475	135	154	143	104	146	274	546	0	5	122	74	255	101	29	8	145	164	32	92	7	516	207	71	250	34	22	25	741	133	393
26	34	166	35	4	1	51	41	27	52	14	239	134	34	126	89	19	6	912	508	139	177	137	107	114	247	586	1	7	124	65	291	93	38	5	126	181	41	117	4	578	211	70	225	19	21	30	741	114	429
22	33	150	33	7	3	45	49	26	51	11	249	132	43	119	77	32	7	876	493	150	189	156	108	110	238	540	1	7	118	62	287	97	24	7	134	156	52	118	3	571	208	75	225	25	31	25	779	117	408
26	44	145	25	6	1	52	59	23	63	17	228	147	37	109	93	26	11	866	531	129	213	135	129	138	281	524	0	6	153	87	290	107	14	11	159	185	52	95	3	549	237	79	249	29	21	26	702	137	432
15	32	174	22	8	5	55	45	23	35	11	224	150	53	144	81	28	8	879	600	146	197	145	113	120	236	583	0	9	103	80	268	108	27	8	157	197	48	109	2	618	253	84	289	19	33	20	738	91	432
33	36	140	26	7	1	45	44	27	56	11	250	141	46	124	76	31	17	949	572	124	197	135	125	129	275	637	1	7	122	93	287	116	30	2	141	189	28	63	4	682	249	72	254	18	24	28	732	95	424
32	35	129	31	5	1	51	47	29	103	15	228	151	42	112	61	26	10	827	532	116	146	132	109	161	269	570	1	5	116	113	270	100	32	5	119	189	34	78	3	616	255	76	231	21	23	21	702	92	407
42	49	124	21	3	0	50	42	32	93	20	194	152	36	124	65	27	11	878	617	129	243	126	106	166	328	510	2	11	151	69	248	101	22	9	132	179	42	79	7	589	249	87	260	20	23	15	702	122	401
38	72	172	18	1	1	52	48	27	122	20	238	139	61	113	69	12	6	947	563	137	246	126	135	162	347	626	1	6	144	129	290	116	20	6	177	180	30	65	6	660	283	77	291	21	30	16	693	126	411
29	35	168	19	0	1	48	42	21	99	22	223	154	42	148	78	9	9	917	430	87	164	136	117	139	254	523	0	10	112	91	296	101	22	7	146	197	36	93	3	603	226	93	275	32	21	15	699	105	445
22	58	145	33	1	0	61	46	25	60	12	227	133	47	116	63	14	8	923	656	157	250	122	80	140	289	541	1	6	102	74	260	91	22	8	183	205	46	94	3	558	226	84	265	30	15	15	684	73	403
38	50	165	25	0	0	44	42	22	85	27	193	139	45	124	89	23	10	992	566	123	251	140	115	177	345	566	0	1	154	129	273	104	20	5	153	175	46	85	8	617	240	87	244	36	19	28	696	114	382
44	51	167	25	1	0	49	47	22	83	20	177	119	54	122	94	16	6	1014	516	120	227	130	111	146	280	524	0	5	141	87	254	103	27	8	163	207	40	83	4	645	238	81	294	37	30	20	734	115	431
36	41	175	26	0	0	54	48	25	81	24	227	148	40	131	57	14	9	1039	378	127	152	149	97	132	247	628	1	9	127	89	269	112	25	7	139	197	31	82	1	645	252	86	261	34	33	24	765	121	449
20	35	202	39	0	0	45	50	30	58	12	207	140	49	123	77	21	3	1010	441	121	198	141	96	164	262	598	1	13	104	76	291	99	22	8	127	183	36	100	3	645	283	75	240	30	11	19	741	102	453
19	30	178	39	0	0	60	36	26	65	15	182	134	68	127	94	17	9	956	515	137	215	148	125	116	254	561	0	3	118	65	285	98	29	5	144	198	36	84	4	585	266	92	235	30	11	15	692	113	390
32	41	152	29	0	0	37	54	21	59	18	210	130	52	139	75	16	4	1005	503	128	190	132	101	107	296	654	1	8	121	112	286	80	29	8	118	189	38	87	4	651	261	79	221	39	15	16	756	95	424
38	50	121	27	0	0	43	53	27	83	32	172	143	37	127	73	19	11	892	731	140	270	167	103	135	283	491	0	7	154	81	263	96	13	3	136	213	44	85	1	607	257	74	280	33	13	17	715	138	412
30	61	161	27	0	0	37	56	17	87	17	209	114	41	121	69	17	10	955	760	153	257	156	105	158	294	539	0	4	150	92	273	110	21	10	141	236	47	94	2	617	260	69	293	39	21	24	728	110	392
33	34	152	29	2	0	49	56	20	58	20	183	129	39	115	88	18	9	952	789	131	269	159	109	136	241	502	1	7	101	96	262	91	34	4	136	212	49	98	4	586	271	70	249	28	14	16	717	92	410
31	37	183	34	2	1	48	46	21	66	17	175	137	41	127	83	20	15	954	710	128	261	141	115	116	218	560	1	3	99	88	285	116	30	5	135	212	37	92	8	627	292	66	272	37	26	11	681	98	427
21	39	191	31	0	0	41	61	26	126	29	189	140	43	108	70	17	8	1050	658	137	231	134	130	132	214	618	2	14	136	75	262	105	36	6	159	199	61	101	2	647	280	65	287	30	18	25	691	105	409
28	36	177	21	0	0	33	54	16	83	20	185	121	35	125	66	24	7	1036	778	138	277	138	111	154	247	546	0	10	147	90	259	102	32	10	168	218	52	105	3	617	297	67	259	34	19	21	741	97	433
20	44	143	35	1	0	39	50	30	49	27	153	129	34	109	76	19	5	1021	684	135	277	138	111	136	234	519	1	8	129	91	282	102	35	8	138	231	52	96	0	584	282	70	282	39	22	18	684	130	437
27	33	163	28	0	0	42	52	25	56	20	176	122	37	107	71	16	9	1046	608	121	251	135	129	146	251	591	0	11	143	80	255	106	29	7	139	215	28	82	3	616	271	74	259	40	11	17	687	113	399
28	38	162	35	1	0	44	48	20	63	16	174	133	38	136	91	20	9	1142	591	153	263	161	95	138	281	641	1	6	128	100	266	92	28	6	108	215	38	105	2	709	280	75	253	21	18	11	707	98	406
22	37	138	39	3	0	45	53	22	54	10	160	106	48	115	84	16	10	979	590	131	254	141	110	97	247	535	0	5	98	54	241	90	24	3	111	221	45	96	3	615	262	90	293	31	14	16	656	114	417
29	34	125	25	1	1	43	51	17	48	11	171	117	58	147	85	22	10	978	582	141	232	147	122	158	285	535	2	6	154	103	285	96	21	7	121	247	47	100	1	576	286	78	285	36	15	13	675	117	424
22	39	118	17	1	0	54	31	30	47	11	158	121	41	125	54	16	6	919	548	141	256	140	114	111	238	515	0	6	139	56	251	90	22	2	131	214	44	87	2	554	263	75	264	51	21	12	655	104	386
30	42	134	26	1	0	47	40	32	38	16	182	121	37	114	69	20	13	1030	533	129	195	134	118	125	224	547	0	9	155	95	287	118	25	5	132	230	49	107	2	575	309	89	295	29	21	19	674	96	401
36	31	129	23	1	1	62	44	16	48	9	187	110	50	133	85	26	8	966	537	143	218	138	118	94	249	478	0	7	133	89	288	109	23	1	140	198	37	86	3	622	301	69	253	33	17	20	703	88	411
32	49	125	28	1	1	42	50	24	51	12	176	137	47	153	89	12	7	959	432	126	142	134	125	125	287	545	1	10	134	101	272	124	21	6	117	179	52	78	3	606	265	66	198	27	14	10	654	94	436
20	38	128	14	2	1	54	45	25	51	12	188	142	47	143	58	27	9	1003	530	149	239	138	105	95	220	579	1	12	111	67	262	135	24	9	118	230	53	105	2	595	277	55	229	38	12	17	668	111	392
24	32	138	23	0	0	58	61	23	33	10	211	107	30	150	55	21	8	958	473	133	215	116	110	130	212	482	1	11	113	65	268	121	21	8	159	212	34	114	3	579	266	63	231	52	12	15	726	120	465
23	44	126	13	1	2	43	46	28	45	11	219	131	33	135	56	9	6	1031	624	128	239	154	117	97	223	587	1	12	132	74	275	121	18	3	110	199	39	117	5	617	275	59	236	26	12	15	678	111	448
19	24	163	25	1	1	55	42	21	23	8	193	133	36	136	75	22	10	1179	614	182	254	138	114	67	171	739	2	7	86	74	277	129	25	6	134	202	47	85	3	691	281	58	254	28	13	10	628	61	441
21	32	142	27	3	1	37	47	24	27	8	201	125	49	160	77	13	4	1080	616	159	246	126	86	122	219	591	1	7	103	55	252	108	28	4	126	192	38	96	0	590	270	60	272	26	14	10	683	71	425
28	49	171	17	2	0	50	54	18	45	7	197	120	47	114	64	15	7	974	663	176	264	118	107	150	265	526	0	11	145	102	271	112	30	9	133	223	49	97	3	565	263	59	313	31	18	16	601	101	411
33	42	151	25	2	0	34	59	24	44	14	205	138	40	118	65	5	9	1003	690	145	274	140	118	146	238	573	1	9	151	110	298	99	24	6	118	226	48	114	2	606	274	55	269	40	17	12	730	105	409
39	40	125	32	0	2	44	43	8	55	7	203	120	51	121	93	7	5	1097	872	140	275	137	103	148	244	594	1	2	153	84	251	123	25	8	131	246	42	89	3	579	281	71	290	30	13	12	688	107	366
29	41	132	23	6	0	40	60	16	38	10	179	131	30	133	67	11	4	981	987	128	393	126	104	147	269	578	1	7	129	83	283	100	25	8	131	299	40	88	4	523	265	73	320	51	14	8	709	99	445
26	28	120	17	2	1	41	56	15	35	7	212	131	45	117	54	16	7	1054	1025	150	355	143	94	118	199	686	0	7	103	67	262	139	20	5	126	238	46	91	1	608	263	55	262	32	18	14	732	74	406
19	35	127	29	4	0	48	46	24	27	6	184	130	37	138	67	11	0	993	962	128	279	131	100	160	246	597	0	9	122	75	286	132	18	7	116	257	52	80	5	579	274	78	302	37	9	12	662	86	425
22	27	162	24	2	0	53	56	22	41	9	223	139	35	109	69	17	2	1046	1094	141	363	130	108	125	213	656	0	7	109	59	257	120	31	5	136	229	40	91	3	591	266	72	293	30	19	12	647	78	418
31	38	142	30	4	0	41	53	15	49	18	188	130	31	142	61	4	8	947	1201	151	355	107	94	143	255	569	0	6	136	118	266	112	37	11	120	237	38	77	4	515	244	72	269	31	10	13	618	106	423
19	28	150	30	5	0	55	58	17	21	11	169	137	42	131	53	3	3	968	1248	145	360	134	101	121	152	535	3	4	98	50	240	126	29	4	155	238	42	89	5	549	232	58	259	39	6	7	641	83	441
18	26	175	16	2	0	57	62	18	23	2	212	120	27	103	59	10	6	1065	1203	159	346	105	100	83	198	550	1	11	105	69	268	113	26	5	150	243	45	99	4	603	239	67	281	45	12	6	691	65	423
25	31	134	24	1	0	40	53	19	32	10	199	97	38	116	65	10	7	975	1177	168	314	128	117	124	237	506	0	9	126	94	249	89	33	8	137	233	58	92	4	538	225	65	284	35	19	13	691	69	428
14	30	139	24	2	0	50	55	19	38	8	176	129	36	128	63	9	6	1124	1142	130	288	113	119	131	195	537	3	7	102	66	245	88	29	11	140	235	43	80	5	603	286	63	288	38	12	12	673	83	434
17	19	138	38	3	0	56	57	27	31	5	189	121	44	137	69	11	1	1085	1123	139	328	143	92	112	164	534	0	8	95	41	272	99	31	9	155	212	36	43	2	564	262	69	292	40	14	15	695	116	434
18	22	138	18	4	0	39	52	27	33	11	176	138	34	127	68	12	9	1105	1108	145	375	116	112	95	198	530	1	10	95	71	249	103	34	3	143	251	35	67	0	559	268	59	280	48	13	16	701	134	442
11	28	152	31	2	2	38	61	24	23	11	170	140	35	120	47	12	1	1116	995	112	317	135	121	142	198	525	3	11	111	62	280	110	37	6	140	261	38	74	2	588	307	62	299	58	14	11	733	110	442
21	25	134	30	3	0	56	52	22	33	7	206	128	42	117	69	11	4	1123	1040	149	302	143	136	146	207	539	2	8	123	69	285	114	30	10	175	238	33	93	4	633	256	67	328	46	8	13	689	108	447
26	24	123	29	2	1	49	69	26	31	7	202	162	47	136	57	11	3	1055	1051	126	364	124	125	122	168	509	3	10	108	65	269	100	29	4	140	192	40	84	5	610	271	64	272	38	10	13	736	97	417
18	37	140	22	5	0	61	50	21	28	9	184	120	37	136	48	6	1	995	1089	145	359	141	119	125	221	471	2	5	102	76	264	111	28	8	143	184	31	68	6	565	280	69	275	29	6	11	710	112	410
20	27	128	31	4	1	47	54	26	31	9	185	146	35	126	67	0	1	984	1224	136	339	124	100	122	184	457	3	10	103	73	270	94	20	1	148	231	45	93	4	596	278	70	294	42	8	17	689	104	391
16	32	143	23	1	0	53	47	26	17	9	173	140	28	115	65	2	0	1011	1150	108	345	117	97	118	179	475	3	7	101	80	251	97	38	10	123	223	31	87	5	605	303	61	266	32	16	7	719	116	415
16	26	140	25	4	0	53	45	30	13	7	197	149	42	152	70	6	5	1013	1045	124	294	134	140	142	223	439	3	13	111	92	281	121	34	4	151	216	27	61	2	598	304	67	302	44	5	17	724	93	455
15	17	162	31	5	2	44	48	25	24	7	207	144	35	122	84	0	3	1077	1071	135	378	137	107	95	174	485	3	9	79	55	256	102	31	9	184	196	41	81	1	614	319	73	327	48	13	6	643	94	470
12	16	154	13	5	0	50	45	32	19	4	231	137	41	120	55	13	3	1094	1002	123	372	135	117	111	178	471	0	7	88	61	259	97	40	8	164	220	45	99	4	575	309	58	298	38	18	7	687	103	450
13	31	142	32	5	0	41	43	35	30	5	182	146	35	125	71	9	5	1084	1057	146	407	119	114	106	148	442	3	11	86	32	267	113	35	8	140	233	39	95	4	618	316	58	310	30	10	12	649	103	431
14	21	133	35	3	0	44	53	20	40	3	162	146	40	133	78	9	1	1035	944	98	385	115	142	122	193	439	3	8	95	58	249	100	32	12	161	228	38	87	1	574	295	67	321	48	14	14	697	126	401
15	30	172	33	1	1	38	48	24	18	6	218	159	41	127	47	4	3	1233	996	124	489	129	120	156	235	487	1	8	118	92	291	113	43	4	167	186	38	86	6	652	282	57	275	33	10	19	690	110	419
26	32	165	21	2	0	39	45	19	31	11	204	144	31	113	80	9	4	1166	882	106	345	132	127	121	252	480	3	10	125	90	259	104	40	11	137	203	50	89	2	566	280	49	259	38	14	7	607	111	422
6	31	161	23	3	0	38	52	23	35	7	158	131	28	119	53	1	4	1152	1011	120	390	165	118	119	250	466	2	17	112	104	293	110	38	19	160	206	28	77	1	653	245	56	301	44	11	18	572	109	436
10	26	148	17	7	1	38	48	30	18	9	171	160	45	133	74	3	3	1103	1059	116	345	136	110	113	186	437	0	8	90	53	272	103	36	8	157	209	49	87	2	605	269	67	256	39	8	11	658	73	432
16	24	136	29	2	0	41	45	23	21	6	162	165	35	119	65	9	5	1140	1071	106	402	126	113	93	180	472	3	12	100	65	262	116	33	11	171	196	31	90	4	588	286	62	272	45	7	18	585	88	422
11	21	148	30	7	0	46	40	26	9	6	170	136	36	119	63	7	3	1153	970	148	364	132	113	77	134	487	1	10	62	39	286	107	40	9	190	235	29	90	0	590	275	59	313	52	15	14	635	78	400
24	26	159	29	1	0	46	42	22	23	12	198	146	24	112	55	7	5	1265	945	107	343	139	108	99	191	528	1	12	95	80	286	115	38	15	167	207	43	92	3	707	277	53	289	44	11	7	615	95	479
15	13	132	28	6	0	37	39	26	10	2	178	130	43	135	65	6	6	1134	1128	157	461	150	117	86	193	373	2	6	115	76	266	130	38	6	168	215	27	55	3	667	299	50	325	43	10	13	672	60	487
18	29	137	29	5	1	47	42	27	21	3	192	174	32	126	44	10	0	1148	1131	152	445	150	130	128	236	408	3	6	125	85	229	128	39	13	169	219	23	55	3	596	297	63	297	56	3	13	703	98	441
16	18	119	23	3	0	36	32	30	33	8	161	138	25	105	55	6	6	1147	1042	124	413	135	130	144	236	434	1	2	121	80	231	117	44	7	171	227	25	63	5	636	280	47	312	40	17	8	618	120	376
23	25	106	27	6	0	36	44	30	22	2	205	138	21	119	58	5	0	1037	1066	141	431	136	105	119	201	374	3	7	105	52	267	106	48	7	145	233	23	55	5	586	261	44	297	60	12	7	641	105	444
7	23	115	26	3	0	42	36	18	15	6	171	166	25	128	68	2	1	1058	1098	128	451	128	126	88	157	430	1	17	116	56	292	104	25	13	149	204	28	70	1	590	277	45	242	58	8	8	675	87	426
28	19	114	26	5	0	39	52	38	11	3	167	155	24	126	56	4	1	1034	1238	160	491	133	129	124	206	441	2	8	100	70	314	128	50	14	142	185	23	69	3	611	300	55	276	42	15	10	642	128	447
18	19	112	18	3	0	53	47	28	31	6	178	166	26	117	57	3	1	1137	1158	143	420	125	99	138	260	513	2	10	126	100	286	108	31	7	143	216	36	71	3	603	302	48	294	56	15	19	638	93	465
17	27	129	26	6	1	40	41	26	9	1	199	170	36	105	56	1	4	1125	1007	161	428	138	120	105	195	482	3	10	116	69	269	141	30	7	168	250	23	70	2	642	301	56	311	53	11	16	664	110	442
21	18	112	22	4	0	38	43	16	15	6	203	146	21	100	56	1	1	1127	1119	142	422	137	129	132	246	537	0	11	161	83	290	113	21	8	160	221	41	86	3	676	301	51	327	55	19	16	691	117	461
14	35	99	19	10	1	41	45	26	11	3	189	143	26	105	53	1	1	1083	1075	128	409	130	130	118	237	534	0	12	130	107	259	131	30	7	153	209	45	79	5	675	281	56	310	56	7	15	659	95	408
19	18	100	18	5	1	55	49	21	7	0	197	150	24	119	41	2	1	1092	1030	139	391	119	108	120	236	516	1	9	128	98	265	105	30	12	196	250	35	87	6	663	308	48	333	65	12	15	652	108	413
16	21	106	17	8	1	36	54	23	15	4	209	163	28	133	56	2	1	1214	1096	161	460	138	110	137	267	543	2	9	152	114	271	114	26	5	156	239	31	86	2	704	314	47	308	60	9	8	592	108	437
8	13	111	13	6	1	39	43	17	8	0	197	182	26	118	53	7	3	1171	1188	143	460	133	117	96	213	531	3	9	100	69	274	124	26	8	164	213	31	73	6	684	333	51	298	58	10	17	675	121	405
18	16	110	27	10	0	43	33	14	4	1	210	137	36	125	51	11	5	1091	1273	143	435	138	123	98	230	482	1	10	118	66	244	126	15	6	131	223	30	85	4	641	306	49	287	62	14	16	650	112	412
[truncated: 47 more rows]
[truncated: 63 more columns]

## Sheet: comt PTX rep 4
A5111	A5112	C5111	C5112	B6111	B6112	C7111	B8111	B8112	C8111	B7211	B7212	B8212	C8211	C8212	C5311	C5312	B8311	B8312	C8311	A5412	B6411	B6412	B7411	B7412	C7411	B8411	B8412	B7121	B7122	C7121	B8121	B8122	C8121	A5221	A5222	C5221	C5222	C8221	C8222	A5422	B5421	B5422	C5421	C7421	C7422	B8421	B8422	A5131	B6132
[truncated: 397 more rows]
[truncated: 48 more columns]

[truncated: 8 more sheets: KO DMSO rep 1, KO DMSO rep 2, KO DMSO rep 3, KO DMSO rep 4, cont DMSO rep1, cont DMSO rep 2, cont DMSO rep 3, cont DMSO rep 4]
